# Supplementary material for: Telomere Maintenance Mechanisms in Cancer
Source: Genes (Basel). 2018 May 3;9(5):241. doi: 10.3390/genes9050241 (PMC5977181; doi:10.3390/genes9050241)
Supplement: Supplementary file 1 [file genes-09-00241-s001.xlsx]

## Sheet: 1-breast
Tumours of the breast
TABLE 3 - Prevalence of TERT promoter mutations		Prev(n)	Total(n)	Total(%)	p1	t1	%	ref1	p2	t2	%	ref2					p4	t4	%	ref4	p5	t5	%	ref5	p6	t6	%	ref6	p7	t7	%	ref7	p8	t8	%	ref8	p9	t9	%	ref9	p10	t10	%	ref10	p11	t11	%	ref11	p12
Fibroepithelial tumours	Fibroadenoma	4	58	0.0689655	4	58	0.0689655	Yoshida2015											#DIV/0!				#DIV/0!				#DIV/0!				#DIV/0!				#DIV/0!				#DIV/0!				#DIV/0!				#DIV/0!
Fibroepithelial tumours	Phyllodes tumour	41	70	0.585714	30	46	0.652174	Yoshida2015	11	24	0.458333	Nozad2017							#DIV/0!				#DIV/0!				#DIV/0!				#DIV/0!				#DIV/0!				#DIV/0!				#DIV/0!				#DIV/0!
n/a	Breast carcinoma, NOS	0	88	0	0	88	0	Killela2013											#DIV/0!				#DIV/0!				#DIV/0!				#DIV/0!				#DIV/0!				#DIV/0!				#DIV/0!				#DIV/0!
n/a	Breast cancer, NOS	0	122	0	0	122	0	Gay-Bellile2017											#DIV/0!				#DIV/0!				#DIV/0!				#DIV/0!				#DIV/0!				#DIV/0!				#DIV/0!				#DIV/0!
			338
TABLE 4A - Prevalence of TERT amplifications		Prev(n)	Total(n)	Total(%)	p1	t1	%	ref1									p4	t4	%	ref4	p5	t5	%	ref5	p6	t6	%	ref6	p7	t7	%	ref7	p8	t8	%	ref8	p9	t9	%	ref9	p10	t10	%	ref10	p11	t11	%	ref11	p12
n/a	Breast cancer, NOS	5	19	0.263158	5	19	0.263158	Zhang2000											#DIV/0!				#DIV/0!				#DIV/0!				#DIV/0!				#DIV/0!				#DIV/0!				#DIV/0!				#DIV/0!
Fibroepithelial tumours	Phyllodes tumour	3	73	0.0410959	3	73	0.0410959	Piscuoglio16											#DIV/0!				#DIV/0!				#DIV/0!				#DIV/0!				#DIV/0!				#DIV/0!				#DIV/0!				#DIV/0!
			92
TABLE 4B - Prevalence of TERC amplifications																	p4	t4	%	ref4	p5	t5	%	ref5	p6	t6	%	ref6	p7	t7	%	ref7	p8	t8	%	ref8	p9	t9	%	ref9	p10	t10	%	ref10	p11	t11	%	ref11	p12
Absence of studies.
TABLE 6 - Prevalence of ALT		Prev(n)	Total(n)	Total(%)	p1	t1	%	ref1	p2	t2	%	ref2	p3	t3	%	ref3	p4	t4	%	ref4	p5	t5	%	ref5	p6	t6	%	ref6	p7	t7	%	ref7	p8	t8	%	ref8	p9	t9	%	ref9	p10	t10	%	ref10	p11	t11	%	ref11	p12
Absence of histotypes with a frequency of ALT equal or higher than 5%.
Special subtypes	Invasive lobular carcinoma	1	27	0.037037	1	27	0.037037	Heaphy2011							#DIV/0!				#DIV/0!				#DIV/0!				#DIV/0!				#DIV/0!				#DIV/0!				#DIV/0!				#DIV/0!				#DIV/0!
Special subtypes	Tubular carcinoma	0	9	0	0	9	0	Heaphy2011							#DIV/0!				#DIV/0!				#DIV/0!				#DIV/0!				#DIV/0!				#DIV/0!				#DIV/0!				#DIV/0!				#DIV/0!
Special subtypes	Carcinoma with medullary features	1	55	0.0181818	1	55	0.0181818	Heaphy2011							#DIV/0!				#DIV/0!				#DIV/0!				#DIV/0!				#DIV/0!				#DIV/0!				#DIV/0!				#DIV/0!				#DIV/0!
Special subtypes	Mucinous carcinoma	0	15	0	0	15	0	Heaphy2011							#DIV/0!				#DIV/0!				#DIV/0!				#DIV/0!				#DIV/0!				#DIV/0!				#DIV/0!				#DIV/0!				#DIV/0!
Intraductal proliferative lesions	Ductal carcinoma	5	271	0.0184502	5	251	0.0199203	Heaphy2011	0	20	0	Heaphy2011			#DIV/0!				#DIV/0!				#DIV/0!				#DIV/0!				#DIV/0!				#DIV/0!				#DIV/0!				#DIV/0!				#DIV/0!
			377
NOS non otherwise specified
[truncated: 115 more columns]

## Sheet: 2-CNS
Tumours of the central nervous system
TABLE 3 - Prevalence of TERT promoter mutations		Prev(n)	Total(n)	Total(%)	p1	t1	%	ref1	p2	t2	%	ref2	p3	t3	%	ref3	p4	t4	%	ref4	p5	t5	%	ref5	p6	t6	%	ref6	p7	t7	%	ref7	p8	t8	%	ref8	p9	t9	%	ref9	p10	t10	%	ref10	p11	t11	%	ref11	p12
Diffuse astrocytic and oligodendrogial tumours	Astrocytoma (grades II-III), NOS	160	699	0.228898	16	88	0.181818	Killela2014	22	56	0.392857	Heidenreich2015	122	555	0.21982	Pekmezeci2017
Diffuse astrocytic and oligodendrogial tumours	Primary glioblastoma, NOS	1216	1800	0.675556	179	256	0.699219	Arita2013	78	147	0.530612	Koelsche2013	62	74	0.837838	Liu2013	79	92	0.858696	Mosrati2015	143	178	0.803371	Simon2015	492	651	0.75576	Nencha2016	94	203	0.463054	Fan2016	89	199	0.447236	You2017
Diffuse astrocytic and oligodendrogial tumours	Secondary glioblastoma, NOS	25	99	0.252525	5	14	0.357143	Arita2013	1	20	0.05	Koelsche2013	4	14	0.285714	Simon2015	15	51	0.294118	You2017
Diffuse astrocytic and oligodendrogial tumours	Paediatric glioblastoma, NOS	3	51	0.0588235	2	19	0.105263	Killela2013	1	32	0.03125	Koelsche2013
Diffuse astrocytic and oligodendrogial tumours	Diffuse astrocytoma, IDH-mutant	38	242	0.157025	1	13	0.0769231	Koelsche2013	7	29	0.241379	Arita2013	10	60	0.166667	Eckel-Passow2015	12	38	0.315789	Arita2016	8	102	0.0784314	Yang2016
Diffuse astrocytic and oligodendrogial tumours	Diffuse astrocytoma, IDH-wildtype	23	87	0.264368	7	12	0.583333	Koelsche2013	1	14	0.0714286	Arita2013	7	14	0.5	Eckel-Passow2015	6	22	0.272727	Arita2016	2	25	0.08	Yang2016
Diffuse astrocytic and oligodendrogial tumours	Diffuse astrocytoma, NOS	104	549	0.189435	1	13	0.0769231	Labussierre2014	8	40	0.2	Huang2015	7	46	0.152174	Batista2016	66	247	0.267206	Gao2016	22	203	0.108374	You2017
Diffuse astrocytic and oligodendrogial tumours	Anaplastic astrocytoma, IDH-mutant	28	248	0.112903	7	69	0.101449	Koelsche2013	6	34	0.176471	Arita2013	6	77	0.0779221	Eckel-Passow2015	7	40	0.175	Arita2016	1	5	0.2	Yang2016	1	23	0.0434783	Lee2017
Diffuse astrocytic and oligodendrogial tumours	Anaplastic astroctyoma, IDH-wildtype	104	220	0.472727	22	48	0.458333	Koelsche2013	14	36	0.388889	Arita2013	32	40	0.8	Eckel-Passow2015	28	66	0.424242	Arita2016	5	15	0.333333	Yang2016	3	15	0.2	Lee2017
Diffuse astrocytic and oligodendrogial tumours	Anaplastic astrocytoma, NOS	29	89	0.325843	12	30	0.4	Labussierre2014	4	12	0.333333	Huang2015	1	10	0.1	Batista2016	12	37	0.324324	You2017
Diffuse astrocytic and oligodendrogial tumours	Glioblastoma, IDH-wildtype	2082	2899	0.718179	156	200	0.78	Arita2013	187	322	0.580745	Nonoguchi2013	290	361	0.803324	Labussierre2014	176	216	0.814815	Killela2014	347	428	0.810748	Eckel-Passow2015	129	157	0.821656	Heidenreich2015	92	120	0.766667	Spiegl-Kreinecker2015	79	87	0.908046	Mosrati2015	185	321	0.576324	Arita2016	58	210	0.27619	Gao2016	41	52	0.788462	Lee2017	92
Diffuse astrocytic and oligodendrogial tumours	Giant cell glioblastoma	6	17	0.352941	6	17	0.352941	Koelsche2013
Diffuse astrocytic and oligodendrogial tumours	Gliosarcoma	21	26	0.807692	21	26	0.807692	Koelsche2013
Diffuse astrocytic and oligodendrogial tumours	Glioblastoma, IDH-mutant	114	470	0.242553	4	10	0.4	Arita2013	10	36	0.277778	Nonoguchi2013	2	24	0.0833333	Killela2014	8	33	0.242424	Labussierre14	1	5	0.2	Mosrati2015	12	44	0.272727	Eckel-Passow2015	3	8	0.375	Heidenreich2015	0	6	0	Speigl-Kreinecker2015	9	16	0.5625	Arita2016	34	120	0.283333	Gao2016	10	13	0.769231	Lee2017	12
Diffuse astrocytic and oligodendrogial tumours	Glioblastoma, NOS	328	523	0.627151	21	25	0.84	Brenna2013	47	56	0.839286	Huang2015	94	203	0.463054	Fan2016	141	211	0.668246	Batista2016	25	28	0.892857	Barthel2017
Diffuse astrocytic and oligodendrogial tumours	Oligodendroglioma, IDH-mutant and 1p/19q-codeleted	296	311	0.951768	18	20	0.9	Koelsche2013	278	291	0.955326	Pekmezci2017
Diffuse astrocytic and oligodendrogial tumours	Oligodendroglioma, NOS	251	469	0.535181	12	19	0.631579	Killela2013	25	34	0.735294	Arita2013	70	119	0.588235	Labussierre2014	19	27	0.703704	Heidenreich2015	34	63	0.539683	Mosrati2015	25	54	0.462963	Batista2016	3	39	0.0769231	Yang2016	10	44	0.227273	Gao2016	53	70	0.757143	You2017
Diffuse astrocytic and oligodendrogial tumours	Anaplastic oligodendroglioma, IDH-mutant and 1p/19q-codeleted	8	38	0.210526	8	38	0.210526	Koelsche2013
Diffuse astrocytic and oligodendrogial tumours	Anaplastic oligodendroglioma, NOS	171	273	0.626374	23	31	0.741935	Arita2013	29	38	0.763158	Koelsche2013	23	26	0.884615	Killela2013	52	81	0.641975	Labussierre14	34	66	0.515152	Batista2016	0	12	0	Yang2016	10	19	0.526316	You2017
Diffuse astrocytic and oligodendrogial tumours	Oligodendroglioma (grades II-III), NOS	132	152	0.868421	69	87	0.793103	Killela2014	63	65	0.969231	Lee2017
Diffuse astrocytic and oligodendrogial tumours	Oligoastrocytoma, NOS	222	618	0.359223	2	9	0.222222	Killela2013	14	35	0.4	Arita2013	11	19	0.578947	Koelsche2013	18	58	0.310345	Killela2014	20	74	0.27027	Labussierre2014	26	55	0.472727	Heidenreich2015	4	10	0.4	Batista2016	5	133	0.037594	Yang2016	122	225	0.542222	You2017
Diffuse astrocytic and oligodendrogial tumours	Anaplastic oligoastrocytoma, NOS	170	415	0.409639	4	15	0.266667	Killela2013	22	45	0.488889	Arita2013	45	86	0.523256	Koelsche2013	34	95	0.357895	Labussierre14	19	46	0.413043	Gao2016	12	45	0.266667	Yang2016	34	83	0.409639	You2017
Ependymal tumours	Ependymoma	6	118	0.0508475	1	36	0.0277778	Killela2013	5	73	0.0684932	Koelsche2013	0	9	0	Killela2013
Choroid plexus tumours	Choroid plexus carcinoma	1	6	0.166667	1	6	0.166667	Koelsche2013
Neuronal and mixed neuronal-glial tumours	Dysembryoplastic neuroepithelial tumour	1	15	0.0666667	0	12	0	Koelsche2013	1	3	0.333333	LKillela2013
Neuronal and mixed neuronal-glial tumours	Desmoplastic infantile astrocytoma and ganglioglioma	1	8	0.125	1	8	0.125	Koelsche2013
Neuronal and mixed neuronal-glial tumours	Paraganglioma	1	12	0.0833333	1	12	0.0833333	Koelsche2013
Embryonal tumours	Medulloblastoma, adult (>18 y) WNT-activated	5	15	0.333333	1	2	0.5	Koelsche2013	4	13	0.307692	Remke2013
Embryonal tumours	Medulloblastoma, adult (>18 y) SHH-MB	119	134	0.88806	13	13	1	Koelsche2013	55	66	0.833333	Remke2013	43	44	0.977273	Kool2014	8	11	0.727273	Lindsey2014
Embryonal tumours	Medulloblastoma, adult (>18 y), NOS	15	23	0.652174	15	23	0.652174	Koelsche2013
Embryonal tumours	Medulloblastoma, paediatric SHH-MB	49	146	0.335616	2	10	0.2	Koelsche2013	25	67	0.373134	Remke2013	22	69	0.318841	Lindsey2014
Embryonal tumours	Medulloblastoma, paediatric, NOS	22	121	0.181818	2	58	0.0344828	Koelsche2013	14	25	0.56	Lindsey2014	6	38	0.157895	Kool2014
Embryonal tumours	Medulloblastoma, NOS	40	166	0.240964	19	91	0.208791	Killela2013	2	6	0.333333	Huang2015	19	69	0.275362	Viana-Pereira2017
Meningiomas	Meningioma with malignant histology	5	18	0.277778	5	18	0.277778	Goutagny2014
Other astrocytic tumours	Pilocytic astrocytoma	4	167	0.0239521	0	111	0	Koelsche2013	0	1	0	Huang2015	4	55	0.0727273	Batista2016
Other astrocytic tumours	Pilomyxoid astrocytoma	0	3	0	0	3	0	Koelsche2013
Other astrocytic tumours	Subependymal giant cell astrocytoma	0	11	0	0	10	0	Koelsche2013	0	1	0	Huang2015
Other astrocytic tumours	Pleomorphic xanthoastrocytoma	1	26	0.0384615	1	25	0.04	Koelsche2013	0	1	0	Huang2015
Ependymal tumours	Mixopapillary ependymoma	0	14	0	0	14	0	Koelsche2013
Ependymal tumours	Subependymoma	0	12	0	0	12	0	Koelsche2013
Ependymal tumours	Anaplastic ependymoma	2	48	0.0416667	2	48	0.0416667	Koelsche2013
Other gliomas	Angiocentric glioma	0	9	0	0	9	0	Koelsche2013
Choroid plexus tumours	Choroid plexus papiloma	0	13	0	0	13	0	Koelsche2013
Neuronal and mixed neuronal-glial tumours	Gangliocytoma	0	2	0	0	2	0	Koelsche2013
Neuronal and mixed neuronal-glial tumours	Ganglioglioma	1	40	0.025	1	40	0.025	Koelsche2013
Neuronal and mixed neuronal-glial tumours	Anaplastic ganglioglioma	0	3	0	0	3	0	Koelsche2013
Neuronal and mixed neuronal-glial tumours	Papillary glioneuronal tumour	0	1	0	0	1	0	Koelsche2013
Neuronal and mixed neuronal-glial tumours	Rosette-forming glioneuronal tumour	0	6	0	0	6	0	Koelsche2013
Neuronal and mixed neuronal-glial tumours	Central neurocytoma	1	28	0.0357143	1	28	0.0357143	Koelsche2013
Tumours of the pineal region	Pineocytoma	0	2	0	0	2	0	Koelsche2013
Tumours of the pineal region	Pineal parenchymal tumours of intermediate differentiation	0	9	0	0	9	0	Koelsche2013
Tumours of the pineal region	Pineoblastoma	0	5	0	0	5	0	Koelsche2013
Tumours of the pineal region	Papillary tumours of the pineal region	0	2	0	0	2	0	Koelsche2013
Embryonal tumours	Medulloblastoma, paediatric WNT-activated	2	66	0.030303	0	10	0	Koelsche2013	2	40	0.05	Remke2013	0	16	0	Lindsey2014
Meningiomas	Meningioma	16	349	0.0458453	0	20	0	Killela2013	0	77	0	Huang2015	16	252	0.0634921	Sahm2016
			11893
TABLE 4A - Prevalence of TERT amplifications		Prev(n)	Total(n)	Total(%)	p1	t1	%	ref1
Tumours of the pineal region	Pineoblastoma	1	1	1	1	1	1	Fan2003
Embryonal tumours	Classic medulloblastoma	5	13	0.384615	5	13	0.384615	Fan2003
Embryonal tumours	Nodular medulloblastoma	1	10	0.1	1	10	0.1	Fan2003
Embryonal tumours	Anaplastic medulloblastoma	2	5	0.4	2	5	0.4	Fan2003
Embryonal tumours	Medulloepithelyoma	2	2	1	2	2	1	Fan2003
Mesenchymal, non-meningothelial tumours	Ewing sarcoma/peripheral primitive neuroectodermal tumour	4	8	0.5	4	8	0.5	Fan2003
Embryonal tumours	Medullomyoblastoma	0	1	0	0	1	0	Fan2003
			40
TABLE 4B - Prevalence of TERC amplifications
Absence of studies.
TABLE 6 - Prevalence of ALT		Prev(n)	Total(n)	Total(%)	p1	t1	%	ref1	p2	t2	%	ref2	p3	t3	%	ref3	p4	t4	%	ref4	p5	t5	%	ref5	p6	t6	%	ref6	p7	t7	%	ref7
Diffuse astrocytic and oligodendrogial tumours	Diffuse astrocytoma, NOS	22	42	0.52381	17	27	0.62963	Heaphy2011	3	11	0.272727	Abedalthagafi2013	2	4	0.5	Rodriguez2016
Diffuse astrocytic and oligodendrogial tumours	Anaplastic astrocytoma, NOS	63	143	0.440559	19	30	0.633333	Heaphy2011	24	91	0.263736	Abedalthagafi2013	17	19	0.894737	Nguyen2013	3	3	1	Rodriguez2016
Diffuse astrocytic and oligodendrogial tumours	Astrocytoma, NOS	17	50	0.34	17	50	0.34	Henson2005
Diffuse astrocytic and oligodendrogial tumours	Anaplastic paediatric astrocytoma, NOS	26	88	0.295455	26	88	0.295455	Abedalthagafi2013
Diffuse astrocytic and oligodendrogial tumours	Paediatric glioblastoma, NOS	31	89	0.348315	14	32	0.4375	Heaphy2011	14	32	0.4375	Nguyen2013	3	25	0.12	Mangerel2014
Diffuse astrocytic and oligodendrogial tumours	Glioblastoma, NOS	147	953	0.15425	19	77	0.246753	Hakin-Smith2003	17	108	0.157407	Chen2006	86	573	0.150087	McDonald2010	12	105	0.114286	Heaphy2011	9	65	0.138462	Nguyen2013	1	2	0.5	Rodriguez2016	3	23	0.130435	Fogli2017
Diffuse astrocytic and oligodendrogial tumours	Oligodendroglioma, NOS	8	40	0.2	8	40	0.2	Heaphy2011
Other astrocytic tumours	Anaplastic pleomorphic xanthoastrocytoma	2	2	1	2	2	1	Rodriguez2016
Choroid plexus tumours	Choroid plexus carcinoma	7	31	0.225806	7	31	0.225806	Mangerel2014
Mesenchimal, non-meningothelial tumours	Ewing sarcoma/peripheral primitive neuroectodermal tumour	5	43	0.116279	5	43	0.116279	Mangerel2014
Diffuse astrocytic and oligodendrogial tumours	Paediatric anaplastic astrocytoma	0	24	0	0	24	0	Abedalthagafi2013
Other astrocytic tumours	Pilocytic astrocytoma	2	45	0.0444444	1	35	0.0285714	Mangerel2014	1	10	0.1	Rodriguez2016
Other astrocytic tumours	Pleomorphic xanthoastrocytoma	0	8	0	0	8	0	Mangerel2014
Ependymal tumours	Ependymoma	0	95	0	0	95	0	Mangerel2014
Choroid plexus tumours	Choroid plexus papilloma	0	24	0	0	24	0	Mangerel2014
Neuronal and mixed neuronal-glial tumours	Ganglioglioma	0	8	0	0	8	0	Mangerel2014
Embryonal tumours	Medulloblastoma, NOS	7	192	0.0364583	1	38	0.0263158	Heaphy2011	3	17	0.176471	Heaphy2011	3	137	0.0218978	Mangerel2014
Embryonal tumours	Atypical teratoid/rhabdoid tumour	0	38	0	0	38	0	Mangerel2014
Tumours of the cranial and paraspinal nerves	Schwannoma	1	44	0.0227273	1	44	0.0227273	Heaphy2011
Meningiomas	Meningioma	1	46	0.0217391	1	46	0.0217391	Heaphy2011
			2005
NOS non otherwise specified
		0	0	#DIV/0!	0	0	#DIV/0!		0	0	#DIV/0!				#DIV/0!				#DIV/0!				#DIV/0!				#DIV/0!				#DIV/0!				#DIV/0!								#DIV/0!				#DIV/0!
		0	0	#DIV/0!	0	0	#DIV/0!		0	0	#DIV/0!				#DIV/0!				#DIV/0!				#DIV/0!				#DIV/0!				#DIV/0!				#DIV/0!								#DIV/0!				#DIV/0!
		0	0	#DIV/0!	0	0	#DIV/0!		0	0	#DIV/0!				#DIV/0!				#DIV/0!				#DIV/0!				#DIV/0!				#DIV/0!				#DIV/0!								#DIV/0!				#DIV/0!
		0	0	#DIV/0!	0	0	#DIV/0!		0	0	#DIV/0!				#DIV/0!				#DIV/0!				#DIV/0!				#DIV/0!				#DIV/0!				#DIV/0!								#DIV/0!				#DIV/0!
		0	0	#DIV/0!	0	0	#DIV/0!		0	0	#DIV/0!				#DIV/0!				#DIV/0!				#DIV/0!				#DIV/0!				#DIV/0!				#DIV/0!								#DIV/0!				#DIV/0!
		0	0	#DIV/0!	0	0	#DIV/0!		0	0	#DIV/0!				#DIV/0!				#DIV/0!				#DIV/0!				#DIV/0!				#DIV/0!				#DIV/0!								#DIV/0!				#DIV/0!
		0	0	#DIV/0!	0	0	#DIV/0!		0	0	#DIV/0!				#DIV/0!				#DIV/0!				#DIV/0!				#DIV/0!				#DIV/0!				#DIV/0!								#DIV/0!				#DIV/0!
		0	0	#DIV/0!	0	0	#DIV/0!		0	0	#DIV/0!				#DIV/0!				#DIV/0!				#DIV/0!				#DIV/0!				#DIV/0!				#DIV/0!								#DIV/0!				#DIV/0!
		0	0	#DIV/0!	0	0	#DIV/0!		0	0	#DIV/0!				#DIV/0!				#DIV/0!				#DIV/0!				#DIV/0!				#DIV/0!				#DIV/0!								#DIV/0!				#DIV/0!
		0	0	#DIV/0!	0	0	#DIV/0!		0	0	#DIV/0!				#DIV/0!				#DIV/0!				#DIV/0!				#DIV/0!				#DIV/0!				#DIV/0!								#DIV/0!				#DIV/0!
		0	0	#DIV/0!	0	0	#DIV/0!		0	0	#DIV/0!				#DIV/0!				#DIV/0!				#DIV/0!				#DIV/0!				#DIV/0!				#DIV/0!								#DIV/0!				#DIV/0!
		0	0	#DIV/0!	0	0	#DIV/0!		0	0	#DIV/0!				#DIV/0!				#DIV/0!				#DIV/0!				#DIV/0!				#DIV/0!				#DIV/0!								#DIV/0!				#DIV/0!
		0	0	#DIV/0!	0	0	#DIV/0!		0	0	#DIV/0!				#DIV/0!				#DIV/0!				#DIV/0!				#DIV/0!				#DIV/0!				#DIV/0!								#DIV/0!				#DIV/0!
		0	0	#DIV/0!	0	0	#DIV/0!		0	0	#DIV/0!				#DIV/0!				#DIV/0!				#DIV/0!				#DIV/0!				#DIV/0!				#DIV/0!								#DIV/0!				#DIV/0!
		0	0	#DIV/0!	0	0	#DIV/0!		0	0	#DIV/0!				#DIV/0!				#DIV/0!				#DIV/0!				#DIV/0!				#DIV/0!				#DIV/0!								#DIV/0!				#DIV/0!
		0	0	#DIV/0!	0	0	#DIV/0!		0	0	#DIV/0!				#DIV/0!				#DIV/0!				#DIV/0!				#DIV/0!				#DIV/0!				#DIV/0!								#DIV/0!				#DIV/0!
		0	0	#DIV/0!	0	0	#DIV/0!		0	0	#DIV/0!				#DIV/0!				#DIV/0!				#DIV/0!				#DIV/0!				#DIV/0!				#DIV/0!								#DIV/0!				#DIV/0!
		0	0	#DIV/0!	0	0	#DIV/0!		0	0	#DIV/0!				#DIV/0!				#DIV/0!				#DIV/0!				#DIV/0!				#DIV/0!				#DIV/0!								#DIV/0!				#DIV/0!
		0	0	#DIV/0!	0	0	#DIV/0!		0	0	#DIV/0!				#DIV/0!				#DIV/0!				#DIV/0!				#DIV/0!				#DIV/0!				#DIV/0!								#DIV/0!				#DIV/0!
		0	0	#DIV/0!	0	0	#DIV/0!		0	0	#DIV/0!				#DIV/0!				#DIV/0!				#DIV/0!				#DIV/0!				#DIV/0!				#DIV/0!								#DIV/0!				#DIV/0!
		0	0	#DIV/0!	0	0	#DIV/0!		0	0	#DIV/0!				#DIV/0!				#DIV/0!				#DIV/0!				#DIV/0!				#DIV/0!				#DIV/0!								#DIV/0!				#DIV/0!
		0	0	#DIV/0!	0	0	#DIV/0!		0	0	#DIV/0!				#DIV/0!				#DIV/0!				#DIV/0!				#DIV/0!				#DIV/0!				#DIV/0!								#DIV/0!				#DIV/0!
		0	0	#DIV/0!	0	0	#DIV/0!		0	0	#DIV/0!				#DIV/0!				#DIV/0!				#DIV/0!				#DIV/0!				#DIV/0!				#DIV/0!								#DIV/0!				#DIV/0!
		0	0	#DIV/0!	0	0	#DIV/0!		0	0	#DIV/0!				#DIV/0!				#DIV/0!				#DIV/0!				#DIV/0!				#DIV/0!				#DIV/0!								#DIV/0!				#DIV/0!
		0	0	#DIV/0!	0	0	#DIV/0!		0	0	#DIV/0!				#DIV/0!				#DIV/0!				#DIV/0!				#DIV/0!				#DIV/0!				#DIV/0!								#DIV/0!				#DIV/0!
		0	0	#DIV/0!	0	0	#DIV/0!		0	0	#DIV/0!				#DIV/0!				#DIV/0!				#DIV/0!				#DIV/0!				#DIV/0!				#DIV/0!								#DIV/0!				#DIV/0!
		0	0	#DIV/0!	0	0	#DIV/0!		0	0	#DIV/0!				#DIV/0!				#DIV/0!				#DIV/0!				#DIV/0!				#DIV/0!				#DIV/0!								#DIV/0!				#DIV/0!
		0	0	#DIV/0!	0	0	#DIV/0!		0	0	#DIV/0!				#DIV/0!				#DIV/0!				#DIV/0!				#DIV/0!				#DIV/0!				#DIV/0!								#DIV/0!				#DIV/0!
		0	0	#DIV/0!	0	0	#DIV/0!		0	0	#DIV/0!				#DIV/0!				#DIV/0!				#DIV/0!				#DIV/0!				#DIV/0!				#DIV/0!								#DIV/0!				#DIV/0!
		0	0	#DIV/0!	0	0	#DIV/0!		0	0	#DIV/0!				#DIV/0!				#DIV/0!				#DIV/0!				#DIV/0!				#DIV/0!				#DIV/0!								#DIV/0!				#DIV/0!
		0	0	#DIV/0!	0	0	#DIV/0!		0	0	#DIV/0!				#DIV/0!				#DIV/0!				#DIV/0!				#DIV/0!				#DIV/0!				#DIV/0!								#DIV/0!				#DIV/0!
		0	0	#DIV/0!	0	0	#DIV/0!		0	0	#DIV/0!				#DIV/0!				#DIV/0!				#DIV/0!				#DIV/0!				#DIV/0!				#DIV/0!								#DIV/0!				#DIV/0!
		0	0	#DIV/0!	0	0	#DIV/0!		0	0	#DIV/0!				#DIV/0!				#DIV/0!				#DIV/0!				#DIV/0!				#DIV/0!				#DIV/0!								#DIV/0!				#DIV/0!
		0	0	#DIV/0!	0	0	#DIV/0!		0	0	#DIV/0!				#DIV/0!				#DIV/0!				#DIV/0!				#DIV/0!				#DIV/0!				#DIV/0!								#DIV/0!				#DIV/0!
		0	0	#DIV/0!	0	0	#DIV/0!		0	0	#DIV/0!				#DIV/0!				#DIV/0!				#DIV/0!				#DIV/0!				#DIV/0!				#DIV/0!								#DIV/0!				#DIV/0!
		0	0	#DIV/0!	0	0	#DIV/0!		0	0	#DIV/0!				#DIV/0!				#DIV/0!				#DIV/0!				#DIV/0!				#DIV/0!				#DIV/0!								#DIV/0!				#DIV/0!
		0	0	#DIV/0!	0	0	#DIV/0!		0	0	#DIV/0!				#DIV/0!				#DIV/0!				#DIV/0!				#DIV/0!				#DIV/0!				#DIV/0!								#DIV/0!				#DIV/0!
		0	0	#DIV/0!	0	0	#DIV/0!		0	0	#DIV/0!				#DIV/0!				#DIV/0!				#DIV/0!				#DIV/0!				#DIV/0!				#DIV/0!								#DIV/0!				#DIV/0!
		0	0	#DIV/0!	0	0	#DIV/0!		0	0	#DIV/0!				#DIV/0!				#DIV/0!				#DIV/0!				#DIV/0!				#DIV/0!				#DIV/0!								#DIV/0!				#DIV/0!
		0	0	#DIV/0!	0	0	#DIV/0!		0	0	#DIV/0!				#DIV/0!				#DIV/0!				#DIV/0!				#DIV/0!				#DIV/0!				#DIV/0!								#DIV/0!				#DIV/0!
		0	0	#DIV/0!	0	0	#DIV/0!		0	0	#DIV/0!				#DIV/0!				#DIV/0!				#DIV/0!				#DIV/0!				#DIV/0!				#DIV/0!								#DIV/0!				#DIV/0!
		0	0	#DIV/0!	0	0	#DIV/0!		0	0	#DIV/0!				#DIV/0!				#DIV/0!				#DIV/0!				#DIV/0!				#DIV/0!				#DIV/0!								#DIV/0!				#DIV/0!
		0	0	#DIV/0!	0	0	#DIV/0!		0	0	#DIV/0!				#DIV/0!				#DIV/0!				#DIV/0!				#DIV/0!				#DIV/0!				#DIV/0!								#DIV/0!				#DIV/0!
		0	0	#DIV/0!	0	0	#DIV/0!		0	0	#DIV/0!				#DIV/0!				#DIV/0!				#DIV/0!				#DIV/0!				#DIV/0!				#DIV/0!								#DIV/0!				#DIV/0!
		0	0	#DIV/0!	0	0	#DIV/0!		0	0	#DIV/0!				#DIV/0!				#DIV/0!				#DIV/0!				#DIV/0!				#DIV/0!				#DIV/0!								#DIV/0!				#DIV/0!
		0	0	#DIV/0!	0	0	#DIV/0!		0	0	#DIV/0!				#DIV/0!				#DIV/0!				#DIV/0!				#DIV/0!				#DIV/0!				#DIV/0!								#DIV/0!				#DIV/0!
		0	0	#DIV/0!	0	0	#DIV/0!		0	0	#DIV/0!				#DIV/0!				#DIV/0!				#DIV/0!				#DIV/0!				#DIV/0!				#DIV/0!								#DIV/0!				#DIV/0!
		0	0	#DIV/0!	0	0	#DIV/0!		0	0	#DIV/0!				#DIV/0!				#DIV/0!				#DIV/0!				#DIV/0!				#DIV/0!				#DIV/0!								#DIV/0!				#DIV/0!
		0	0	#DIV/0!	0	0	#DIV/0!		0	0	#DIV/0!				#DIV/0!				#DIV/0!				#DIV/0!				#DIV/0!				#DIV/0!				#DIV/0!								#DIV/0!				#DIV/0!
		0	0	#DIV/0!	0	0	#DIV/0!		0	0	#DIV/0!				#DIV/0!				#DIV/0!				#DIV/0!				#DIV/0!				#DIV/0!				#DIV/0!								#DIV/0!				#DIV/0!
		0	0	#DIV/0!	0	0	#DIV/0!		0	0	#DIV/0!				#DIV/0!				#DIV/0!				#DIV/0!				#DIV/0!				#DIV/0!				#DIV/0!								#DIV/0!				#DIV/0!
		0	0	#DIV/0!	0	0	#DIV/0!		0	0	#DIV/0!				#DIV/0!				#DIV/0!				#DIV/0!				#DIV/0!				#DIV/0!				#DIV/0!								#DIV/0!				#DIV/0!
		0	0	#DIV/0!	0	0	#DIV/0!		0	0	#DIV/0!				#DIV/0!				#DIV/0!				#DIV/0!				#DIV/0!				#DIV/0!				#DIV/0!								#DIV/0!				#DIV/0!
		0	0	#DIV/0!	0	0	#DIV/0!		0	0	#DIV/0!				#DIV/0!				#DIV/0!				#DIV/0!				#DIV/0!				#DIV/0!				#DIV/0!								#DIV/0!				#DIV/0!
		0	0	#DIV/0!	0	0	#DIV/0!		0	0	#DIV/0!				#DIV/0!				#DIV/0!				#DIV/0!				#DIV/0!				#DIV/0!				#DIV/0!								#DIV/0!				#DIV/0!
		0	0	#DIV/0!	0	0	#DIV/0!		0	0	#DIV/0!				#DIV/0!				#DIV/0!				#DIV/0!				#DIV/0!				#DIV/0!				#DIV/0!								#DIV/0!				#DIV/0!
		0	0	#DIV/0!	0	0	#DIV/0!		0	0	#DIV/0!				#DIV/0!				#DIV/0!				#DIV/0!				#DIV/0!				#DIV/0!				#DIV/0!								#DIV/0!				#DIV/0!
		0	0	#DIV/0!	0	0	#DIV/0!		0	0	#DIV/0!				#DIV/0!				#DIV/0!				#DIV/0!				#DIV/0!				#DIV/0!				#DIV/0!								#DIV/0!				#DIV/0!
		0	0	#DIV/0!	0	0	#DIV/0!		0	0	#DIV/0!				#DIV/0!				#DIV/0!				#DIV/0!				#DIV/0!				#DIV/0!				#DIV/0!								#DIV/0!				#DIV/0!
		0	0	#DIV/0!	0	0	#DIV/0!		0	0	#DIV/0!				#DIV/0!				#DIV/0!				#DIV/0!				#DIV/0!				#DIV/0!				#DIV/0!								#DIV/0!				#DIV/0!
		0	0	#DIV/0!	0	0	#DIV/0!		0	0	#DIV/0!				#DIV/0!				#DIV/0!				#DIV/0!				#DIV/0!				#DIV/0!				#DIV/0!								#DIV/0!				#DIV/0!
		0	0	#DIV/0!	0	0	#DIV/0!		0	0	#DIV/0!				#DIV/0!				#DIV/0!				#DIV/0!				#DIV/0!				#DIV/0!				#DIV/0!								#DIV/0!				#DIV/0!
		0	0	#DIV/0!	0	0	#DIV/0!		0	0	#DIV/0!				#DIV/0!				#DIV/0!				#DIV/0!				#DIV/0!				#DIV/0!				#DIV/0!								#DIV/0!				#DIV/0!
		0	0	#DIV/0!	0	0	#DIV/0!		0	0	#DIV/0!				#DIV/0!				#DIV/0!				#DIV/0!				#DIV/0!				#DIV/0!				#DIV/0!								#DIV/0!				#DIV/0!
		0	0	#DIV/0!	0	0	#DIV/0!		0	0	#DIV/0!				#DIV/0!				#DIV/0!				#DIV/0!				#DIV/0!				#DIV/0!				#DIV/0!								#DIV/0!				#DIV/0!
		0	0	#DIV/0!	0	0	#DIV/0!		0	0	#DIV/0!				#DIV/0!				#DIV/0!				#DIV/0!				#DIV/0!				#DIV/0!				#DIV/0!								#DIV/0!				#DIV/0!
		0	0	#DIV/0!	0	0	#DIV/0!		0	0	#DIV/0!				#DIV/0!				#DIV/0!				#DIV/0!				#DIV/0!				#DIV/0!				#DIV/0!								#DIV/0!				#DIV/0!
		0	0	#DIV/0!	0	0	#DIV/0!		0	0	#DIV/0!				#DIV/0!				#DIV/0!				#DIV/0!				#DIV/0!				#DIV/0!				#DIV/0!								#DIV/0!				#DIV/0!
		0	0	#DIV/0!	0	0	#DIV/0!		0	0	#DIV/0!				#DIV/0!				#DIV/0!				#DIV/0!				#DIV/0!				#DIV/0!				#DIV/0!								#DIV/0!				#DIV/0!
		0	0	#DIV/0!	0	0	#DIV/0!		0	0	#DIV/0!				#DIV/0!				#DIV/0!				#DIV/0!				#DIV/0!				#DIV/0!				#DIV/0!								#DIV/0!				#DIV/0!
		0	0	#DIV/0!	0	0	#DIV/0!		0	0	#DIV/0!				#DIV/0!				#DIV/0!				#DIV/0!				#DIV/0!				#DIV/0!				#DIV/0!								#DIV/0!				#DIV/0!
		0	0	#DIV/0!	0	0	#DIV/0!		0	0	#DIV/0!				#DIV/0!				#DIV/0!				#DIV/0!				#DIV/0!				#DIV/0!				#DIV/0!								#DIV/0!				#DIV/0!
		0	0	#DIV/0!	0	0	#DIV/0!		0	0	#DIV/0!				#DIV/0!				#DIV/0!				#DIV/0!				#DIV/0!				#DIV/0!				#DIV/0!								#DIV/0!				#DIV/0!
		0	0	#DIV/0!	0	0	#DIV/0!		0	0	#DIV/0!				#DIV/0!				#DIV/0!				#DIV/0!				#DIV/0!				#DIV/0!				#DIV/0!								#DIV/0!				#DIV/0!
		0	0	#DIV/0!	0	0	#DIV/0!		0	0	#DIV/0!				#DIV/0!				#DIV/0!				#DIV/0!				#DIV/0!				#DIV/0!				#DIV/0!								#DIV/0!				#DIV/0!
		0	0	#DIV/0!	0	0	#DIV/0!		0	0	#DIV/0!				#DIV/0!				#DIV/0!				#DIV/0!				#DIV/0!				#DIV/0!				#DIV/0!								#DIV/0!				#DIV/0!
		0	0	#DIV/0!	0	0	#DIV/0!		0	0	#DIV/0!				#DIV/0!				#DIV/0!				#DIV/0!				#DIV/0!				#DIV/0!				#DIV/0!								#DIV/0!				#DIV/0!
		0	0	#DIV/0!	0	0	#DIV/0!		0	0	#DIV/0!				#DIV/0!				#DIV/0!				#DIV/0!				#DIV/0!				#DIV/0!				#DIV/0!								#DIV/0!				#DIV/0!
		0	0	#DIV/0!	0	0	#DIV/0!		0	0	#DIV/0!				#DIV/0!				#DIV/0!				#DIV/0!				#DIV/0!				#DIV/0!				#DIV/0!								#DIV/0!				#DIV/0!
		0	0	#DIV/0!	0	0	#DIV/0!		0	0	#DIV/0!				#DIV/0!				#DIV/0!				#DIV/0!				#DIV/0!				#DIV/0!				#DIV/0!								#DIV/0!				#DIV/0!
		0	0	#DIV/0!	0	0	#DIV/0!		0	0	#DIV/0!				#DIV/0!				#DIV/0!				#DIV/0!				#DIV/0!				#DIV/0!				#DIV/0!								#DIV/0!				#DIV/0!
		0	0	#DIV/0!	0	0	#DIV/0!		0	0	#DIV/0!				#DIV/0!				#DIV/0!				#DIV/0!				#DIV/0!				#DIV/0!				#DIV/0!								#DIV/0!				#DIV/0!
		0	0	#DIV/0!	0	0	#DIV/0!		0	0	#DIV/0!				#DIV/0!				#DIV/0!				#DIV/0!				#DIV/0!				#DIV/0!				#DIV/0!								#DIV/0!				#DIV/0!
		0	0	#DIV/0!	0	0	#DIV/0!		0	0	#DIV/0!				#DIV/0!				#DIV/0!				#DIV/0!				#DIV/0!				#DIV/0!				#DIV/0!								#DIV/0!				#DIV/0!
		0	0	#DIV/0!	0	0	#DIV/0!		0	0	#DIV/0!				#DIV/0!				#DIV/0!				#DIV/0!				#DIV/0!				#DIV/0!				#DIV/0!								#DIV/0!				#DIV/0!
		0	0	#DIV/0!	0	0	#DIV/0!		0	0	#DIV/0!				#DIV/0!				#DIV/0!				#DIV/0!				#DIV/0!				#DIV/0!				#DIV/0!								#DIV/0!				#DIV/0!
		0	0	#DIV/0!	0	0	#DIV/0!		0	0	#DIV/0!				#DIV/0!				#DIV/0!				#DIV/0!				#DIV/0!				#DIV/0!				#DIV/0!								#DIV/0!				#DIV/0!
		0	0	#DIV/0!	0	0	#DIV/0!		0	0	#DIV/0!				#DIV/0!				#DIV/0!				#DIV/0!				#DIV/0!				#DIV/0!				#DIV/0!								#DIV/0!				#DIV/0!
		0	0	#DIV/0!	0	0	#DIV/0!		0	0	#DIV/0!				#DIV/0!				#DIV/0!				#DIV/0!				#DIV/0!				#DIV/0!				#DIV/0!								#DIV/0!				#DIV/0!
		0	0	#DIV/0!	0	0	#DIV/0!		0	0	#DIV/0!				#DIV/0!				#DIV/0!				#DIV/0!				#DIV/0!				#DIV/0!				#DIV/0!								#DIV/0!				#DIV/0!
		0	0	#DIV/0!	0	0	#DIV/0!		0	0	#DIV/0!				#DIV/0!				#DIV/0!				#DIV/0!				#DIV/0!				#DIV/0!				#DIV/0!								#DIV/0!				#DIV/0!
		0	0	#DIV/0!	0	0	#DIV/0!		0	0	#DIV/0!				#DIV/0!				#DIV/0!				#DIV/0!				#DIV/0!				#DIV/0!				#DIV/0!								#DIV/0!				#DIV/0!
		0	0	#DIV/0!	0	0	#DIV/0!		0	0	#DIV/0!				#DIV/0!				#DIV/0!				#DIV/0!				#DIV/0!				#DIV/0!				#DIV/0!								#DIV/0!				#DIV/0!
		0	0	#DIV/0!	0	0	#DIV/0!		0	0	#DIV/0!				#DIV/0!				#DIV/0!				#DIV/0!				#DIV/0!				#DIV/0!				#DIV/0!								#DIV/0!				#DIV/0!
		0	0	#DIV/0!	0	0	#DIV/0!		0	0	#DIV/0!				#DIV/0!				#DIV/0!				#DIV/0!				#DIV/0!				#DIV/0!				#DIV/0!								#DIV/0!				#DIV/0!
		0	0	#DIV/0!	0	0	#DIV/0!		0	0	#DIV/0!				#DIV/0!				#DIV/0!				#DIV/0!				#DIV/0!				#DIV/0!				#DIV/0!								#DIV/0!				#DIV/0!
		0	0	#DIV/0!	0	0	#DIV/0!		0	0	#DIV/0!				#DIV/0!				#DIV/0!				#DIV/0!				#DIV/0!				#DIV/0!				#DIV/0!								#DIV/0!				#DIV/0!
		0	0	#DIV/0!	0	0	#DIV/0!		0	0	#DIV/0!				#DIV/0!				#DIV/0!				#DIV/0!				#DIV/0!				#DIV/0!				#DIV/0!								#DIV/0!				#DIV/0!
		0	0	#DIV/0!	0	0	#DIV/0!		0	0	#DIV/0!				#DIV/0!				#DIV/0!				#DIV/0!				#DIV/0!				#DIV/0!				#DIV/0!								#DIV/0!				#DIV/0!
		0	0	#DIV/0!	0	0	#DIV/0!		0	0	#DIV/0!				#DIV/0!				#DIV/0!				#DIV/0!				#DIV/0!				#DIV/0!				#DIV/0!								#DIV/0!				#DIV/0!
		0	0	#DIV/0!	0	0	#DIV/0!		0	0	#DIV/0!				#DIV/0!				#DIV/0!				#DIV/0!				#DIV/0!				#DIV/0!				#DIV/0!								#DIV/0!				#DIV/0!
		0	0	#DIV/0!	0	0	#DIV/0!		0	0	#DIV/0!				#DIV/0!				#DIV/0!				#DIV/0!				#DIV/0!				#DIV/0!				#DIV/0!								#DIV/0!				#DIV/0!
		0	0	#DIV/0!	0	0	#DIV/0!		0	0	#DIV/0!				#DIV/0!				#DIV/0!				#DIV/0!				#DIV/0!				#DIV/0!				#DIV/0!								#DIV/0!				#DIV/0!
		0	0	#DIV/0!	0	0	#DIV/0!		0	0	#DIV/0!				#DIV/0!				#DIV/0!				#DIV/0!				#DIV/0!				#DIV/0!				#DIV/0!								#DIV/0!				#DIV/0!
		0	0	#DIV/0!	0	0	#DIV/0!		0	0	#DIV/0!				#DIV/0!				#DIV/0!				#DIV/0!				#DIV/0!				#DIV/0!				#DIV/0!								#DIV/0!				#DIV/0!
		0	0	#DIV/0!	0	0	#DIV/0!		0	0	#DIV/0!				#DIV/0!				#DIV/0!				#DIV/0!				#DIV/0!				#DIV/0!				#DIV/0!								#DIV/0!				#DIV/0!
		0	0	#DIV/0!	0	0	#DIV/0!		0	0	#DIV/0!				#DIV/0!				#DIV/0!				#DIV/0!				#DIV/0!				#DIV/0!				#DIV/0!								#DIV/0!				#DIV/0!
		0	0	#DIV/0!	0	0	#DIV/0!		0	0	#DIV/0!				#DIV/0!				#DIV/0!				#DIV/0!				#DIV/0!				#DIV/0!				#DIV/0!								#DIV/0!				#DIV/0!
		0	0	#DIV/0!	0	0	#DIV/0!		0	0	#DIV/0!				#DIV/0!				#DIV/0!				#DIV/0!				#DIV/0!				#DIV/0!				#DIV/0!								#DIV/0!				#DIV/0!
		0	0	#DIV/0!	0	0	#DIV/0!		0	0	#DIV/0!				#DIV/0!				#DIV/0!				#DIV/0!				#DIV/0!				#DIV/0!				#DIV/0!								#DIV/0!				#DIV/0!
		0	0	#DIV/0!	0	0	#DIV/0!		0	0	#DIV/0!				#DIV/0!				#DIV/0!				#DIV/0!				#DIV/0!				#DIV/0!				#DIV/0!								#DIV/0!				#DIV/0!
		0	0	#DIV/0!	0	0	#DIV/0!		0	0	#DIV/0!				#DIV/0!				#DIV/0!				#DIV/0!				#DIV/0!				#DIV/0!				#DIV/0!								#DIV/0!				#DIV/0!
		0	0	#DIV/0!	0	0	#DIV/0!		0	0	#DIV/0!				#DIV/0!				#DIV/0!				#DIV/0!				#DIV/0!				#DIV/0!				#DIV/0!								#DIV/0!				#DIV/0!
		0	0	#DIV/0!	0	0	#DIV/0!		0	0	#DIV/0!				#DIV/0!				#DIV/0!				#DIV/0!				#DIV/0!				#DIV/0!				#DIV/0!								#DIV/0!				#DIV/0!
		0	0	#DIV/0!	0	0	#DIV/0!		0	0	#DIV/0!				#DIV/0!				#DIV/0!				#DIV/0!				#DIV/0!				#DIV/0!				#DIV/0!								#DIV/0!				#DIV/0!
		0	0	#DIV/0!	0	0	#DIV/0!		0	0	#DIV/0!				#DIV/0!				#DIV/0!				#DIV/0!				#DIV/0!				#DIV/0!				#DIV/0!								#DIV/0!				#DIV/0!
		0	0	#DIV/0!	0	0	#DIV/0!		0	0	#DIV/0!				#DIV/0!				#DIV/0!				#DIV/0!				#DIV/0!				#DIV/0!				#DIV/0!								#DIV/0!				#DIV/0!
		0	0	#DIV/0!	0	0	#DIV/0!		0	0	#DIV/0!				#DIV/0!				#DIV/0!				#DIV/0!				#DIV/0!				#DIV/0!				#DIV/0!								#DIV/0!				#DIV/0!
		0	0	#DIV/0!	0	0	#DIV/0!		0	0	#DIV/0!				#DIV/0!				#DIV/0!				#DIV/0!				#DIV/0!				#DIV/0!				#DIV/0!								#DIV/0!				#DIV/0!
		0	0	#DIV/0!	0	0	#DIV/0!		0	0	#DIV/0!				#DIV/0!				#DIV/0!				#DIV/0!				#DIV/0!				#DIV/0!				#DIV/0!								#DIV/0!				#DIV/0!
		0	0	#DIV/0!	0	0	#DIV/0!		0	0	#DIV/0!				#DIV/0!				#DIV/0!				#DIV/0!				#DIV/0!				#DIV/0!				#DIV/0!								#DIV/0!				#DIV/0!
		0	0	#DIV/0!	0	0	#DIV/0!		0	0	#DIV/0!				#DIV/0!				#DIV/0!				#DIV/0!				#DIV/0!				#DIV/0!				#DIV/0!								#DIV/0!				#DIV/0!
		0	0	#DIV/0!	0	0	#DIV/0!		0	0	#DIV/0!				#DIV/0!				#DIV/0!				#DIV/0!				#DIV/0!				#DIV/0!				#DIV/0!								#DIV/0!				#DIV/0!
		0	0	#DIV/0!	0	0	#DIV/0!		0	0	#DIV/0!				#DIV/0!				#DIV/0!				#DIV/0!				#DIV/0!				#DIV/0!				#DIV/0!								#DIV/0!				#DIV/0!
		0	0	#DIV/0!	0	0	#DIV/0!		0	0	#DIV/0!				#DIV/0!				#DIV/0!				#DIV/0!				#DIV/0!				#DIV/0!				#DIV/0!								#DIV/0!				#DIV/0!
		0	0	#DIV/0!	0	0	#DIV/0!		0	0	#DIV/0!				#DIV/0!				#DIV/0!				#DIV/0!				#DIV/0!				#DIV/0!				#DIV/0!								#DIV/0!				#DIV/0!
		0	0	#DIV/0!	0	0	#DIV/0!		0	0	#DIV/0!				#DIV/0!				#DIV/0!				#DIV/0!				#DIV/0!				#DIV/0!				#DIV/0!								#DIV/0!				#DIV/0!
		0	0	#DIV/0!	0	0	#DIV/0!		0	0	#DIV/0!				#DIV/0!				#DIV/0!				#DIV/0!				#DIV/0!				#DIV/0!				#DIV/0!								#DIV/0!				#DIV/0!
		0	0	#DIV/0!	0	0	#DIV/0!		0	0	#DIV/0!				#DIV/0!				#DIV/0!				#DIV/0!				#DIV/0!				#DIV/0!				#DIV/0!								#DIV/0!				#DIV/0!
		0	0	#DIV/0!	0	0	#DIV/0!		0	0	#DIV/0!				#DIV/0!				#DIV/0!				#DIV/0!				#DIV/0!				#DIV/0!				#DIV/0!								#DIV/0!				#DIV/0!
		0	0	#DIV/0!	0	0	#DIV/0!		0	0	#DIV/0!				#DIV/0!				#DIV/0!				#DIV/0!				#DIV/0!				#DIV/0!				#DIV/0!								#DIV/0!				#DIV/0!
		0	0	#DIV/0!	0	0	#DIV/0!		0	0	#DIV/0!				#DIV/0!				#DIV/0!				#DIV/0!				#DIV/0!				#DIV/0!				#DIV/0!								#DIV/0!				#DIV/0!
		0	0	#DIV/0!	0	0	#DIV/0!		0	0	#DIV/0!				#DIV/0!				#DIV/0!				#DIV/0!				#DIV/0!				#DIV/0!				#DIV/0!								#DIV/0!				#DIV/0!
		0	0	#DIV/0!	0	0	#DIV/0!		0	0	#DIV/0!				#DIV/0!				#DIV/0!				#DIV/0!				#DIV/0!				#DIV/0!				#DIV/0!								#DIV/0!				#DIV/0!
		0	0	#DIV/0!	0	0	#DIV/0!		0	0	#DIV/0!				#DIV/0!				#DIV/0!				#DIV/0!				#DIV/0!				#DIV/0!				#DIV/0!								#DIV/0!				#DIV/0!
		0	0	#DIV/0!	0	0	#DIV/0!		0	0	#DIV/0!				#DIV/0!				#DIV/0!				#DIV/0!				#DIV/0!				#DIV/0!				#DIV/0!								#DIV/0!				#DIV/0!
		0	0	#DIV/0!	0	0	#DIV/0!		0	0	#DIV/0!				#DIV/0!				#DIV/0!				#DIV/0!				#DIV/0!				#DIV/0!				#DIV/0!								#DIV/0!				#DIV/0!
		0	0	#DIV/0!	0	0	#DIV/0!		0	0	#DIV/0!				#DIV/0!				#DIV/0!				#DIV/0!				#DIV/0!				#DIV/0!				#DIV/0!								#DIV/0!				#DIV/0!
		0	0	#DIV/0!	0	0	#DIV/0!		0	0	#DIV/0!				#DIV/0!				#DIV/0!				#DIV/0!				#DIV/0!				#DIV/0!				#DIV/0!								#DIV/0!				#DIV/0!
		0	0	#DIV/0!	0	0	#DIV/0!		0	0	#DIV/0!				#DIV/0!				#DIV/0!				#DIV/0!				#DIV/0!				#DIV/0!				#DIV/0!								#DIV/0!				#DIV/0!
		0	0	#DIV/0!	0	0	#DIV/0!		0	0	#DIV/0!				#DIV/0!				#DIV/0!				#DIV/0!				#DIV/0!				#DIV/0!				#DIV/0!								#DIV/0!				#DIV/0!
		0	0	#DIV/0!	0	0	#DIV/0!		0	0	#DIV/0!				#DIV/0!				#DIV/0!				#DIV/0!				#DIV/0!				#DIV/0!				#DIV/0!								#DIV/0!				#DIV/0!
		0	0	#DIV/0!	0	0	#DIV/0!		0	0	#DIV/0!				#DIV/0!				#DIV/0!				#DIV/0!				#DIV/0!				#DIV/0!				#DIV/0!								#DIV/0!				#DIV/0!
		0	0	#DIV/0!	0	0	#DIV/0!		0	0	#DIV/0!				#DIV/0!				#DIV/0!				#DIV/0!				#DIV/0!				#DIV/0!				#DIV/0!								#DIV/0!				#DIV/0!
		0	0	#DIV/0!	0	0	#DIV/0!		0	0	#DIV/0!				#DIV/0!				#DIV/0!				#DIV/0!				#DIV/0!				#DIV/0!				#DIV/0!								#DIV/0!				#DIV/0!
		0	0	#DIV/0!	0	0	#DIV/0!		0	0	#DIV/0!				#DIV/0!				#DIV/0!				#DIV/0!				#DIV/0!				#DIV/0!				#DIV/0!								#DIV/0!				#DIV/0!
		0	0	#DIV/0!	0	0	#DIV/0!		0	0	#DIV/0!				#DIV/0!				#DIV/0!				#DIV/0!				#DIV/0!				#DIV/0!				#DIV/0!								#DIV/0!				#DIV/0!
		0	0	#DIV/0!	0	0	#DIV/0!		0	0	#DIV/0!				#DIV/0!				#DIV/0!				#DIV/0!				#DIV/0!				#DIV/0!				#DIV/0!								#DIV/0!				#DIV/0!
		0	0	#DIV/0!	0	0	#DIV/0!		0	0	#DIV/0!				#DIV/0!				#DIV/0!				#DIV/0!				#DIV/0!				#DIV/0!				#DIV/0!								#DIV/0!				#DIV/0!
		0	0	#DIV/0!	0	0	#DIV/0!		0	0	#DIV/0!				#DIV/0!				#DIV/0!				#DIV/0!				#DIV/0!				#DIV/0!				#DIV/0!								#DIV/0!				#DIV/0!
		0	0	#DIV/0!	0	0	#DIV/0!		0	0	#DIV/0!				#DIV/0!				#DIV/0!				#DIV/0!				#DIV/0!				#DIV/0!				#DIV/0!								#DIV/0!				#DIV/0!
		0	0	#DIV/0!	0	0	#DIV/0!		0	0	#DIV/0!				#DIV/0!				#DIV/0!				#DIV/0!				#DIV/0!				#DIV/0!				#DIV/0!								#DIV/0!				#DIV/0!
		0	0	#DIV/0!	0	0	#DIV/0!		0	0	#DIV/0!				#DIV/0!				#DIV/0!				#DIV/0!				#DIV/0!				#DIV/0!				#DIV/0!								#DIV/0!				#DIV/0!
		0	0	#DIV/0!	0	0	#DIV/0!		0	0	#DIV/0!				#DIV/0!				#DIV/0!				#DIV/0!				#DIV/0!				#DIV/0!				#DIV/0!								#DIV/0!				#DIV/0!
		0	0	#DIV/0!	0	0	#DIV/0!		0	0	#DIV/0!				#DIV/0!				#DIV/0!				#DIV/0!				#DIV/0!				#DIV/0!				#DIV/0!								#DIV/0!				#DIV/0!
		0	0	#DIV/0!	0	0	#DIV/0!		0	0	#DIV/0!				#DIV/0!				#DIV/0!				#DIV/0!				#DIV/0!				#DIV/0!				#DIV/0!								#DIV/0!				#DIV/0!
		0	0	#DIV/0!	0	0	#DIV/0!		0	0	#DIV/0!				#DIV/0!				#DIV/0!				#DIV/0!				#DIV/0!				#DIV/0!				#DIV/0!								#DIV/0!				#DIV/0!
		0	0	#DIV/0!	0	0	#DIV/0!		0	0	#DIV/0!				#DIV/0!				#DIV/0!				#DIV/0!				#DIV/0!				#DIV/0!				#DIV/0!								#DIV/0!				#DIV/0!
		0	0	#DIV/0!	0	0	#DIV/0!		0	0	#DIV/0!				#DIV/0!				#DIV/0!				#DIV/0!				#DIV/0!				#DIV/0!				#DIV/0!								#DIV/0!				#DIV/0!
		0	0	#DIV/0!	0	0	#DIV/0!		0	0	#DIV/0!				#DIV/0!				#DIV/0!				#DIV/0!				#DIV/0!				#DIV/0!				#DIV/0!								#DIV/0!				#DIV/0!
		0	0	#DIV/0!	0	0	#DIV/0!		0	0	#DIV/0!				#DIV/0!				#DIV/0!				#DIV/0!				#DIV/0!				#DIV/0!				#DIV/0!								#DIV/0!				#DIV/0!
		0	0	#DIV/0!	0	0	#DIV/0!		0	0	#DIV/0!				#DIV/0!				#DIV/0!				#DIV/0!				#DIV/0!				#DIV/0!				#DIV/0!								#DIV/0!				#DIV/0!
		0	0	#DIV/0!	0	0	#DIV/0!		0	0	#DIV/0!				#DIV/0!				#DIV/0!				#DIV/0!				#DIV/0!				#DIV/0!				#DIV/0!								#DIV/0!				#DIV/0!
		0	0	#DIV/0!	0	0	#DIV/0!		0	0	#DIV/0!				#DIV/0!				#DIV/0!				#DIV/0!				#DIV/0!				#DIV/0!				#DIV/0!								#DIV/0!				#DIV/0!
		0	0	#DIV/0!	0	0	#DIV/0!		0	0	#DIV/0!				#DIV/0!				#DIV/0!				#DIV/0!				#DIV/0!				#DIV/0!				#DIV/0!								#DIV/0!				#DIV/0!
		0	0	#DIV/0!	0	0	#DIV/0!		0	0	#DIV/0!				#DIV/0!				#DIV/0!				#DIV/0!				#DIV/0!				#DIV/0!				#DIV/0!								#DIV/0!				#DIV/0!
		0	0	#DIV/0!	0	0	#DIV/0!		0	0	#DIV/0!				#DIV/0!				#DIV/0!				#DIV/0!				#DIV/0!				#DIV/0!				#DIV/0!								#DIV/0!				#DIV/0!
		0	0	#DIV/0!	0	0	#DIV/0!		0	0	#DIV/0!				#DIV/0!				#DIV/0!				#DIV/0!				#DIV/0!				#DIV/0!				#DIV/0!								#DIV/0!				#DIV/0!
		0	0	#DIV/0!	0	0	#DIV/0!		0	0	#DIV/0!				#DIV/0!				#DIV/0!				#DIV/0!				#DIV/0!				#DIV/0!				#DIV/0!								#DIV/0!				#DIV/0!
		0	0	#DIV/0!	0	0	#DIV/0!		0	0	#DIV/0!				#DIV/0!				#DIV/0!				#DIV/0!				#DIV/0!				#DIV/0!				#DIV/0!								#DIV/0!				#DIV/0!
		0	0	#DIV/0!	0	0	#DIV/0!		0	0	#DIV/0!				#DIV/0!				#DIV/0!				#DIV/0!				#DIV/0!				#DIV/0!				#DIV/0!								#DIV/0!				#DIV/0!
		0	0	#DIV/0!	0	0	#DIV/0!		0	0	#DIV/0!				#DIV/0!				#DIV/0!				#DIV/0!				#DIV/0!				#DIV/0!				#DIV/0!								#DIV/0!				#DIV/0!
		0	0	#DIV/0!	0	0	#DIV/0!		0	0	#DIV/0!				#DIV/0!				#DIV/0!				#DIV/0!				#DIV/0!				#DIV/0!				#DIV/0!								#DIV/0!				#DIV/0!
		0	0	#DIV/0!	0	0	#DIV/0!		0	0	#DIV/0!				#DIV/0!				#DIV/0!				#DIV/0!				#DIV/0!				#DIV/0!				#DIV/0!								#DIV/0!				#DIV/0!
		0	0	#DIV/0!	0	0	#DIV/0!		0	0	#DIV/0!				#DIV/0!				#DIV/0!				#DIV/0!				#DIV/0!				#DIV/0!				#DIV/0!								#DIV/0!				#DIV/0!
		0	0	#DIV/0!	0	0	#DIV/0!		0	0	#DIV/0!				#DIV/0!				#DIV/0!				#DIV/0!				#DIV/0!				#DIV/0!				#DIV/0!								#DIV/0!				#DIV/0!
		0	0	#DIV/0!	0	0	#DIV/0!		0	0	#DIV/0!				#DIV/0!				#DIV/0!				#DIV/0!				#DIV/0!				#DIV/0!				#DIV/0!								#DIV/0!				#DIV/0!
		0	0	#DIV/0!	0	0	#DIV/0!		0	0	#DIV/0!				#DIV/0!				#DIV/0!				#DIV/0!				#DIV/0!				#DIV/0!				#DIV/0!								#DIV/0!				#DIV/0!
		0	0	#DIV/0!	0	0	#DIV/0!		0	0	#DIV/0!				#DIV/0!				#DIV/0!				#DIV/0!				#DIV/0!				#DIV/0!				#DIV/0!								#DIV/0!				#DIV/0!
		0	0	#DIV/0!	0	0	#DIV/0!		0	0	#DIV/0!				#DIV/0!				#DIV/0!				#DIV/0!				#DIV/0!				#DIV/0!				#DIV/0!								#DIV/0!				#DIV/0!
		0	0	#DIV/0!	0	0	#DIV/0!		0	0	#DIV/0!				#DIV/0!				#DIV/0!				#DIV/0!				#DIV/0!				#DIV/0!				#DIV/0!								#DIV/0!				#DIV/0!
		0	0	#DIV/0!	0	0	#DIV/0!		0	0	#DIV/0!				#DIV/0!				#DIV/0!				#DIV/0!				#DIV/0!				#DIV/0!				#DIV/0!								#DIV/0!				#DIV/0!
		0	0	#DIV/0!	0	0	#DIV/0!		0	0	#DIV/0!				#DIV/0!				#DIV/0!				#DIV/0!				#DIV/0!				#DIV/0!				#DIV/0!								#DIV/0!				#DIV/0!
		0	0	#DIV/0!	0	0	#DIV/0!		0	0	#DIV/0!				#DIV/0!				#DIV/0!				#DIV/0!				#DIV/0!				#DIV/0!				#DIV/0!								#DIV/0!				#DIV/0!
		0	0	#DIV/0!	0	0	#DIV/0!		0	0	#DIV/0!				#DIV/0!				#DIV/0!				#DIV/0!				#DIV/0!				#DIV/0!				#DIV/0!								#DIV/0!				#DIV/0!
		0	0	#DIV/0!	0	0	#DIV/0!		0	0	#DIV/0!				#DIV/0!				#DIV/0!				#DIV/0!				#DIV/0!				#DIV/0!				#DIV/0!								#DIV/0!				#DIV/0!
		0	0	#DIV/0!	0	0	#DIV/0!		0	0	#DIV/0!				#DIV/0!				#DIV/0!				#DIV/0!				#DIV/0!				#DIV/0!				#DIV/0!								#DIV/0!				#DIV/0!
		0	0	#DIV/0!	0	0	#DIV/0!		0	0	#DIV/0!				#DIV/0!				#DIV/0!				#DIV/0!				#DIV/0!				#DIV/0!				#DIV/0!								#DIV/0!				#DIV/0!
		0	0	#DIV/0!	0	0	#DIV/0!		0	0	#DIV/0!				#DIV/0!				#DIV/0!				#DIV/0!				#DIV/0!				#DIV/0!				#DIV/0!								#DIV/0!				#DIV/0!
		0	0	#DIV/0!	0	0	#DIV/0!		0	0	#DIV/0!				#DIV/0!				#DIV/0!				#DIV/0!				#DIV/0!				#DIV/0!				#DIV/0!								#DIV/0!				#DIV/0!
		0	0	#DIV/0!	0	0	#DIV/0!		0	0	#DIV/0!				#DIV/0!				#DIV/0!				#DIV/0!				#DIV/0!				#DIV/0!				#DIV/0!								#DIV/0!				#DIV/0!
		0	0	#DIV/0!	0	0	#DIV/0!		0	0	#DIV/0!				#DIV/0!				#DIV/0!				#DIV/0!				#DIV/0!				#DIV/0!				#DIV/0!								#DIV/0!				#DIV/0!
		0	0	#DIV/0!	0	0	#DIV/0!		0	0	#DIV/0!				#DIV/0!				#DIV/0!				#DIV/0!				#DIV/0!				#DIV/0!				#DIV/0!								#DIV/0!				#DIV/0!
		0	0	#DIV/0!	0	0	#DIV/0!		0	0	#DIV/0!				#DIV/0!				#DIV/0!				#DIV/0!				#DIV/0!				#DIV/0!				#DIV/0!								#DIV/0!				#DIV/0!
		0	0	#DIV/0!	0	0	#DIV/0!		0	0	#DIV/0!				#DIV/0!				#DIV/0!				#DIV/0!				#DIV/0!				#DIV/0!				#DIV/0!								#DIV/0!				#DIV/0!
		0	0	#DIV/0!	0	0	#DIV/0!		0	0	#DIV/0!				#DIV/0!				#DIV/0!				#DIV/0!				#DIV/0!				#DIV/0!				#DIV/0!								#DIV/0!				#DIV/0!
		0	0	#DIV/0!	0	0	#DIV/0!		0	0	#DIV/0!				#DIV/0!				#DIV/0!				#DIV/0!				#DIV/0!				#DIV/0!				#DIV/0!								#DIV/0!				#DIV/0!
		0	0	#DIV/0!	0	0	#DIV/0!		0	0	#DIV/0!				#DIV/0!				#DIV/0!				#DIV/0!				#DIV/0!				#DIV/0!				#DIV/0!								#DIV/0!				#DIV/0!
		0	0	#DIV/0!	0	0	#DIV/0!		0	0	#DIV/0!				#DIV/0!				#DIV/0!				#DIV/0!				#DIV/0!				#DIV/0!				#DIV/0!								#DIV/0!				#DIV/0!
		0	0	#DIV/0!	0	0	#DIV/0!		0	0	#DIV/0!				#DIV/0!				#DIV/0!				#DIV/0!				#DIV/0!				#DIV/0!				#DIV/0!								#DIV/0!				#DIV/0!
		0	0	#DIV/0!	0	0	#DIV/0!		0	0	#DIV/0!				#DIV/0!				#DIV/0!				#DIV/0!				#DIV/0!				#DIV/0!				#DIV/0!								#DIV/0!				#DIV/0!
		0	0	#DIV/0!	0	0	#DIV/0!		0	0	#DIV/0!				#DIV/0!				#DIV/0!				#DIV/0!				#DIV/0!				#DIV/0!				#DIV/0!								#DIV/0!				#DIV/0!
		0	0	#DIV/0!	0	0	#DIV/0!		0	0	#DIV/0!				#DIV/0!				#DIV/0!				#DIV/0!				#DIV/0!				#DIV/0!				#DIV/0!								#DIV/0!				#DIV/0!
		0	0	#DIV/0!	0	0	#DIV/0!		0	0	#DIV/0!				#DIV/0!				#DIV/0!				#DIV/0!				#DIV/0!				#DIV/0!				#DIV/0!								#DIV/0!				#DIV/0!
		0	0	#DIV/0!	0	0	#DIV/0!		0	0	#DIV/0!				#DIV/0!				#DIV/0!				#DIV/0!				#DIV/0!				#DIV/0!				#DIV/0!								#DIV/0!				#DIV/0!
		0	0	#DIV/0!	0	0	#DIV/0!		0	0	#DIV/0!				#DIV/0!				#DIV/0!				#DIV/0!				#DIV/0!				#DIV/0!				#DIV/0!								#DIV/0!				#DIV/0!
		0	0	#DIV/0!	0	0	#DIV/0!		0	0	#DIV/0!				#DIV/0!				#DIV/0!				#DIV/0!				#DIV/0!				#DIV/0!				#DIV/0!								#DIV/0!				#DIV/0!
		0	0	#DIV/0!	0	0	#DIV/0!		0	0	#DIV/0!				#DIV/0!				#DIV/0!				#DIV/0!				#DIV/0!				#DIV/0!				#DIV/0!								#DIV/0!				#DIV/0!
		0	0	#DIV/0!	0	0	#DIV/0!		0	0	#DIV/0!				#DIV/0!				#DIV/0!				#DIV/0!				#DIV/0!				#DIV/0!				#DIV/0!								#DIV/0!				#DIV/0!
		0	0	#DIV/0!	0	0	#DIV/0!		0	0	#DIV/0!				#DIV/0!				#DIV/0!				#DIV/0!				#DIV/0!				#DIV/0!				#DIV/0!								#DIV/0!				#DIV/0!
		0	0	#DIV/0!	0	0	#DIV/0!		0	0	#DIV/0!				#DIV/0!				#DIV/0!				#DIV/0!				#DIV/0!				#DIV/0!				#DIV/0!								#DIV/0!				#DIV/0!
		0	0	#DIV/0!	0	0	#DIV/0!		0	0	#DIV/0!				#DIV/0!				#DIV/0!				#DIV/0!				#DIV/0!				#DIV/0!				#DIV/0!								#DIV/0!				#DIV/0!
		0	0	#DIV/0!	0	0	#DIV/0!		0	0	#DIV/0!				#DIV/0!				#DIV/0!				#DIV/0!				#DIV/0!				#DIV/0!				#DIV/0!								#DIV/0!				#DIV/0!
		0	0	#DIV/0!	0	0	#DIV/0!		0	0	#DIV/0!				#DIV/0!				#DIV/0!				#DIV/0!				#DIV/0!				#DIV/0!				#DIV/0!								#DIV/0!				#DIV/0!
		0	0	#DIV/0!	0	0	#DIV/0!		0	0	#DIV/0!				#DIV/0!				#DIV/0!				#DIV/0!				#DIV/0!				#DIV/0!				#DIV/0!								#DIV/0!				#DIV/0!
		0	0	#DIV/0!	0	0	#DIV/0!		0	0	#DIV/0!				#DIV/0!				#DIV/0!				#DIV/0!				#DIV/0!				#DIV/0!				#DIV/0!								#DIV/0!				#DIV/0!
		0	0	#DIV/0!	0	0	#DIV/0!		0	0	#DIV/0!				#DIV/0!				#DIV/0!				#DIV/0!				#DIV/0!				#DIV/0!				#DIV/0!								#DIV/0!				#DIV/0!
		0	0	#DIV/0!	0	0	#DIV/0!		0	0	#DIV/0!				#DIV/0!				#DIV/0!				#DIV/0!				#DIV/0!				#DIV/0!				#DIV/0!								#DIV/0!				#DIV/0!
		0	0	#DIV/0!	0	0	#DIV/0!		0	0	#DIV/0!				#DIV/0!				#DIV/0!				#DIV/0!				#DIV/0!				#DIV/0!				#DIV/0!								#DIV/0!				#DIV/0!
		0	0	#DIV/0!	0	0	#DIV/0!		0	0	#DIV/0!				#DIV/0!				#DIV/0!				#DIV/0!				#DIV/0!				#DIV/0!				#DIV/0!								#DIV/0!				#DIV/0!
		0	0	#DIV/0!	0	0	#DIV/0!		0	0	#DIV/0!				#DIV/0!				#DIV/0!				#DIV/0!				#DIV/0!				#DIV/0!				#DIV/0!								#DIV/0!				#DIV/0!
		0	0	#DIV/0!	0	0	#DIV/0!		0	0	#DIV/0!				#DIV/0!				#DIV/0!				#DIV/0!				#DIV/0!				#DIV/0!				#DIV/0!								#DIV/0!				#DIV/0!
		0	0	#DIV/0!	0	0	#DIV/0!		0	0	#DIV/0!				#DIV/0!				#DIV/0!				#DIV/0!				#DIV/0!				#DIV/0!				#DIV/0!								#DIV/0!				#DIV/0!
		0	0	#DIV/0!	0	0	#DIV/0!		0	0	#DIV/0!				#DIV/0!				#DIV/0!				#DIV/0!				#DIV/0!				#DIV/0!				#DIV/0!								#DIV/0!				#DIV/0!
		0	0	#DIV/0!	0	0	#DIV/0!		0	0	#DIV/0!				#DIV/0!				#DIV/0!				#DIV/0!				#DIV/0!				#DIV/0!				#DIV/0!								#DIV/0!				#DIV/0!
		0	0	#DIV/0!	0	0	#DIV/0!		0	0	#DIV/0!				#DIV/0!				#DIV/0!				#DIV/0!				#DIV/0!				#DIV/0!				#DIV/0!								#DIV/0!				#DIV/0!
		0	0	#DIV/0!	0	0	#DIV/0!		0	0	#DIV/0!				#DIV/0!				#DIV/0!				#DIV/0!				#DIV/0!				#DIV/0!				#DIV/0!								#DIV/0!				#DIV/0!
		0	0	#DIV/0!	0	0	#DIV/0!		0	0	#DIV/0!				#DIV/0!				#DIV/0!				#DIV/0!				#DIV/0!				#DIV/0!				#DIV/0!								#DIV/0!				#DIV/0!
		0	0	#DIV/0!	0	0	#DIV/0!		0	0	#DIV/0!				#DIV/0!				#DIV/0!				#DIV/0!				#DIV/0!				#DIV/0!				#DIV/0!								#DIV/0!				#DIV/0!
		0	0	#DIV/0!	0	0	#DIV/0!		0	0	#DIV/0!				#DIV/0!				#DIV/0!				#DIV/0!				#DIV/0!				#DIV/0!				#DIV/0!								#DIV/0!				#DIV/0!
		0	0	#DIV/0!	0	0	#DIV/0!		0	0	#DIV/0!				#DIV/0!				#DIV/0!				#DIV/0!				#DIV/0!				#DIV/0!				#DIV/0!								#DIV/0!				#DIV/0!
		0	0	#DIV/0!	0	0	#DIV/0!		0	0	#DIV/0!				#DIV/0!				#DIV/0!				#DIV/0!				#DIV/0!				#DIV/0!				#DIV/0!								#DIV/0!				#DIV/0!
		0	0	#DIV/0!	0	0	#DIV/0!		0	0	#DIV/0!				#DIV/0!				#DIV/0!				#DIV/0!				#DIV/0!				#DIV/0!				#DIV/0!								#DIV/0!				#DIV/0!
		0	0	#DIV/0!	0	0	#DIV/0!		0	0	#DIV/0!				#DIV/0!				#DIV/0!				#DIV/0!				#DIV/0!				#DIV/0!				#DIV/0!								#DIV/0!				#DIV/0!
		0	0	#DIV/0!	0	0	#DIV/0!		0	0	#DIV/0!				#DIV/0!				#DIV/0!				#DIV/0!				#DIV/0!				#DIV/0!				#DIV/0!								#DIV/0!				#DIV/0!
		0	0	#DIV/0!	0	0	#DIV/0!		0	0	#DIV/0!				#DIV/0!				#DIV/0!				#DIV/0!				#DIV/0!				#DIV/0!				#DIV/0!								#DIV/0!				#DIV/0!
		0	0	#DIV/0!	0	0	#DIV/0!		0	0	#DIV/0!				#DIV/0!				#DIV/0!				#DIV/0!				#DIV/0!				#DIV/0!				#DIV/0!								#DIV/0!				#DIV/0!
		0	0	#DIV/0!	0	0	#DIV/0!		0	0	#DIV/0!				#DIV/0!				#DIV/0!				#DIV/0!				#DIV/0!				#DIV/0!				#DIV/0!								#DIV/0!				#DIV/0!
		0	0	#DIV/0!	0	0	#DIV/0!		0	0	#DIV/0!				#DIV/0!				#DIV/0!				#DIV/0!				#DIV/0!				#DIV/0!				#DIV/0!								#DIV/0!				#DIV/0!
		0	0	#DIV/0!	0	0	#DIV/0!		0	0	#DIV/0!				#DIV/0!				#DIV/0!				#DIV/0!				#DIV/0!				#DIV/0!				#DIV/0!								#DIV/0!				#DIV/0!
		0	0	#DIV/0!	0	0	#DIV/0!		0	0	#DIV/0!				#DIV/0!				#DIV/0!				#DIV/0!				#DIV/0!				#DIV/0!				#DIV/0!								#DIV/0!				#DIV/0!
		0	0	#DIV/0!	0	0	#DIV/0!		0	0	#DIV/0!				#DIV/0!				#DIV/0!				#DIV/0!				#DIV/0!				#DIV/0!				#DIV/0!								#DIV/0!				#DIV/0!
		0	0	#DIV/0!	0	0	#DIV/0!		0	0	#DIV/0!				#DIV/0!				#DIV/0!				#DIV/0!				#DIV/0!				#DIV/0!				#DIV/0!								#DIV/0!				#DIV/0!
		0	0	#DIV/0!	0	0	#DIV/0!		0	0	#DIV/0!				#DIV/0!				#DIV/0!				#DIV/0!				#DIV/0!				#DIV/0!				#DIV/0!								#DIV/0!				#DIV/0!
		0	0	#DIV/0!	0	0	#DIV/0!		0	0	#DIV/0!				#DIV/0!				#DIV/0!				#DIV/0!				#DIV/0!				#DIV/0!				#DIV/0!								#DIV/0!				#DIV/0!
		0	0	#DIV/0!	0	0	#DIV/0!		0	0	#DIV/0!				#DIV/0!				#DIV/0!				#DIV/0!				#DIV/0!				#DIV/0!				#DIV/0!								#DIV/0!				#DIV/0!
		0	0	#DIV/0!	0	0	#DIV/0!		0	0	#DIV/0!				#DIV/0!				#DIV/0!				#DIV/0!				#DIV/0!				#DIV/0!				#DIV/0!								#DIV/0!				#DIV/0!
		0	0	#DIV/0!	0	0	#DIV/0!		0	0	#DIV/0!				#DIV/0!				#DIV/0!				#DIV/0!				#DIV/0!				#DIV/0!				#DIV/0!								#DIV/0!				#DIV/0!
		0	0	#DIV/0!	0	0	#DIV/0!		0	0	#DIV/0!				#DIV/0!				#DIV/0!				#DIV/0!				#DIV/0!				#DIV/0!				#DIV/0!								#DIV/0!				#DIV/0!
		0	0	#DIV/0!	0	0	#DIV/0!		0	0	#DIV/0!				#DIV/0!				#DIV/0!				#DIV/0!				#DIV/0!				#DIV/0!				#DIV/0!								#DIV/0!				#DIV/0!
		0	0	#DIV/0!	0	0	#DIV/0!		0	0	#DIV/0!				#DIV/0!				#DIV/0!				#DIV/0!				#DIV/0!				#DIV/0!				#DIV/0!								#DIV/0!				#DIV/0!
		0	0	#DIV/0!	0	0	#DIV/0!		0	0	#DIV/0!				#DIV/0!				#DIV/0!				#DIV/0!				#DIV/0!				#DIV/0!				#DIV/0!								#DIV/0!				#DIV/0!
		0	0	#DIV/0!	0	0	#DIV/0!		0	0	#DIV/0!				#DIV/0!				#DIV/0!				#DIV/0!				#DIV/0!				#DIV/0!				#DIV/0!								#DIV/0!				#DIV/0!
		0	0	#DIV/0!	0	0	#DIV/0!		0	0	#DIV/0!				#DIV/0!				#DIV/0!				#DIV/0!				#DIV/0!				#DIV/0!				#DIV/0!								#DIV/0!				#DIV/0!
		0	0	#DIV/0!	0	0	#DIV/0!		0	0	#DIV/0!				#DIV/0!				#DIV/0!				#DIV/0!				#DIV/0!				#DIV/0!				#DIV/0!								#DIV/0!				#DIV/0!
		0	0	#DIV/0!	0	0	#DIV/0!		0	0	#DIV/0!				#DIV/0!				#DIV/0!				#DIV/0!				#DIV/0!				#DIV/0!				#DIV/0!								#DIV/0!				#DIV/0!
		0	0	#DIV/0!	0	0	#DIV/0!		0	0	#DIV/0!				#DIV/0!				#DIV/0!				#DIV/0!				#DIV/0!				#DIV/0!				#DIV/0!								#DIV/0!				#DIV/0!
		0	0	#DIV/0!	0	0	#DIV/0!		0	0	#DIV/0!				#DIV/0!				#DIV/0!				#DIV/0!				#DIV/0!				#DIV/0!				#DIV/0!								#DIV/0!				#DIV/0!
		0	0	#DIV/0!	0	0	#DIV/0!		0	0	#DIV/0!				#DIV/0!				#DIV/0!				#DIV/0!				#DIV/0!				#DIV/0!				#DIV/0!								#DIV/0!				#DIV/0!
		0	0	#DIV/0!	0	0	#DIV/0!		0	0	#DIV/0!				#DIV/0!				#DIV/0!				#DIV/0!				#DIV/0!				#DIV/0!				#DIV/0!								#DIV/0!				#DIV/0!
		0	0	#DIV/0!	0	0	#DIV/0!		0	0	#DIV/0!				#DIV/0!				#DIV/0!				#DIV/0!				#DIV/0!				#DIV/0!				#DIV/0!								#DIV/0!				#DIV/0!
		0	0	#DIV/0!	0	0	#DIV/0!		0	0	#DIV/0!				#DIV/0!				#DIV/0!				#DIV/0!				#DIV/0!				#DIV/0!				#DIV/0!								#DIV/0!				#DIV/0!
		0	0	#DIV/0!	0	0	#DIV/0!		0	0	#DIV/0!				#DIV/0!				#DIV/0!				#DIV/0!				#DIV/0!				#DIV/0!				#DIV/0!								#DIV/0!				#DIV/0!
		0	0	#DIV/0!	0	0	#DIV/0!		0	0	#DIV/0!				#DIV/0!				#DIV/0!				#DIV/0!				#DIV/0!				#DIV/0!				#DIV/0!								#DIV/0!				#DIV/0!
		0	0	#DIV/0!	0	0	#DIV/0!		0	0	#DIV/0!				#DIV/0!				#DIV/0!				#DIV/0!				#DIV/0!				#DIV/0!				#DIV/0!								#DIV/0!				#DIV/0!
		0	0	#DIV/0!	0	0	#DIV/0!		0	0	#DIV/0!				#DIV/0!				#DIV/0!				#DIV/0!				#DIV/0!				#DIV/0!				#DIV/0!								#DIV/0!				#DIV/0!
		0	0	#DIV/0!	0	0	#DIV/0!		0	0	#DIV/0!				#DIV/0!				#DIV/0!				#DIV/0!				#DIV/0!				#DIV/0!				#DIV/0!								#DIV/0!				#DIV/0!
		0	0	#DIV/0!	0	0	#DIV/0!		0	0	#DIV/0!				#DIV/0!				#DIV/0!				#DIV/0!				#DIV/0!				#DIV/0!				#DIV/0!								#DIV/0!				#DIV/0!
		0	0	#DIV/0!	0	0	#DIV/0!		0	0	#DIV/0!				#DIV/0!				#DIV/0!				#DIV/0!				#DIV/0!				#DIV/0!				#DIV/0!								#DIV/0!				#DIV/0!
		0	0	#DIV/0!	0	0	#DIV/0!		0	0	#DIV/0!				#DIV/0!				#DIV/0!				#DIV/0!				#DIV/0!				#DIV/0!				#DIV/0!								#DIV/0!				#DIV/0!
		0	0	#DIV/0!	0	0	#DIV/0!		0	0	#DIV/0!				#DIV/0!				#DIV/0!				#DIV/0!				#DIV/0!				#DIV/0!				#DIV/0!								#DIV/0!				#DIV/0!
		0	0	#DIV/0!	0	0	#DIV/0!		0	0	#DIV/0!				#DIV/0!				#DIV/0!				#DIV/0!				#DIV/0!				#DIV/0!				#DIV/0!								#DIV/0!				#DIV/0!
		0	0	#DIV/0!	0	0	#DIV/0!		0	0	#DIV/0!				#DIV/0!				#DIV/0!				#DIV/0!				#DIV/0!				#DIV/0!				#DIV/0!								#DIV/0!				#DIV/0!
		0	0	#DIV/0!	0	0	#DIV/0!		0	0	#DIV/0!				#DIV/0!				#DIV/0!				#DIV/0!				#DIV/0!				#DIV/0!				#DIV/0!								#DIV/0!				#DIV/0!
		0	0	#DIV/0!	0	0	#DIV/0!		0	0	#DIV/0!				#DIV/0!				#DIV/0!				#DIV/0!				#DIV/0!				#DIV/0!				#DIV/0!								#DIV/0!				#DIV/0!
		0	0	#DIV/0!	0	0	#DIV/0!		0	0	#DIV/0!				#DIV/0!				#DIV/0!				#DIV/0!				#DIV/0!				#DIV/0!				#DIV/0!								#DIV/0!				#DIV/0!
		0	0	#DIV/0!	0	0	#DIV/0!		0	0	#DIV/0!				#DIV/0!				#DIV/0!				#DIV/0!				#DIV/0!				#DIV/0!				#DIV/0!								#DIV/0!				#DIV/0!
		0	0	#DIV/0!	0	0	#DIV/0!		0	0	#DIV/0!				#DIV/0!				#DIV/0!				#DIV/0!				#DIV/0!				#DIV/0!				#DIV/0!								#DIV/0!				#DIV/0!
		0	0	#DIV/0!	0	0	#DIV/0!		0	0	#DIV/0!				#DIV/0!				#DIV/0!				#DIV/0!				#DIV/0!				#DIV/0!				#DIV/0!								#DIV/0!				#DIV/0!
		0	0	#DIV/0!	0	0	#DIV/0!		0	0	#DIV/0!				#DIV/0!				#DIV/0!				#DIV/0!				#DIV/0!				#DIV/0!				#DIV/0!								#DIV/0!				#DIV/0!
		0	0	#DIV/0!	0	0	#DIV/0!		0	0	#DIV/0!				#DIV/0!				#DIV/0!				#DIV/0!				#DIV/0!				#DIV/0!				#DIV/0!								#DIV/0!				#DIV/0!
		0	0	#DIV/0!	0	0	#DIV/0!		0	0	#DIV/0!				#DIV/0!				#DIV/0!				#DIV/0!				#DIV/0!				#DIV/0!				#DIV/0!								#DIV/0!				#DIV/0!
		0	0	#DIV/0!	0	0	#DIV/0!		0	0	#DIV/0!				#DIV/0!				#DIV/0!				#DIV/0!				#DIV/0!				#DIV/0!				#DIV/0!								#DIV/0!				#DIV/0!
		0	0	#DIV/0!	0	0	#DIV/0!		0	0	#DIV/0!				#DIV/0!				#DIV/0!				#DIV/0!				#DIV/0!				#DIV/0!				#DIV/0!								#DIV/0!				#DIV/0!
		0	0	#DIV/0!	0	0	#DIV/0!		0	0	#DIV/0!				#DIV/0!				#DIV/0!				#DIV/0!				#DIV/0!				#DIV/0!				#DIV/0!								#DIV/0!				#DIV/0!
		0	0	#DIV/0!	0	0	#DIV/0!		0	0	#DIV/0!				#DIV/0!				#DIV/0!				#DIV/0!				#DIV/0!				#DIV/0!				#DIV/0!								#DIV/0!				#DIV/0!
		0	0	#DIV/0!	0	0	#DIV/0!		0	0	#DIV/0!				#DIV/0!				#DIV/0!				#DIV/0!				#DIV/0!				#DIV/0!				#DIV/0!								#DIV/0!				#DIV/0!
		0	0	#DIV/0!	0	0	#DIV/0!		0	0	#DIV/0!				#DIV/0!				#DIV/0!				#DIV/0!				#DIV/0!				#DIV/0!				#DIV/0!								#DIV/0!				#DIV/0!
		0	0	#DIV/0!	0	0	#DIV/0!		0	0	#DIV/0!				#DIV/0!				#DIV/0!				#DIV/0!				#DIV/0!				#DIV/0!				#DIV/0!								#DIV/0!				#DIV/0!
		0	0	#DIV/0!	0	0	#DIV/0!		0	0	#DIV/0!				#DIV/0!				#DIV/0!				#DIV/0!				#DIV/0!				#DIV/0!				#DIV/0!								#DIV/0!				#DIV/0!
		0	0	#DIV/0!	0	0	#DIV/0!		0	0	#DIV/0!				#DIV/0!				#DIV/0!				#DIV/0!				#DIV/0!				#DIV/0!				#DIV/0!								#DIV/0!				#DIV/0!
		0	0	#DIV/0!	0	0	#DIV/0!		0	0	#DIV/0!				#DIV/0!				#DIV/0!				#DIV/0!				#DIV/0!				#DIV/0!				#DIV/0!								#DIV/0!				#DIV/0!
		0	0	#DIV/0!	0	0	#DIV/0!		0	0	#DIV/0!				#DIV/0!				#DIV/0!				#DIV/0!				#DIV/0!				#DIV/0!				#DIV/0!								#DIV/0!				#DIV/0!
		0	0	#DIV/0!	0	0	#DIV/0!		0	0	#DIV/0!				#DIV/0!				#DIV/0!				#DIV/0!				#DIV/0!				#DIV/0!				#DIV/0!								#DIV/0!				#DIV/0!
		0	0	#DIV/0!	0	0	#DIV/0!		0	0	#DIV/0!				#DIV/0!				#DIV/0!				#DIV/0!				#DIV/0!				#DIV/0!				#DIV/0!								#DIV/0!				#DIV/0!
		0	0	#DIV/0!	0	0	#DIV/0!		0	0	#DIV/0!				#DIV/0!				#DIV/0!				#DIV/0!				#DIV/0!				#DIV/0!				#DIV/0!								#DIV/0!				#DIV/0!
		0	0	#DIV/0!	0	0	#DIV/0!		0	0	#DIV/0!				#DIV/0!				#DIV/0!				#DIV/0!				#DIV/0!				#DIV/0!				#DIV/0!								#DIV/0!				#DIV/0!
		0	0	#DIV/0!	0	0	#DIV/0!		0	0	#DIV/0!				#DIV/0!				#DIV/0!				#DIV/0!				#DIV/0!				#DIV/0!				#DIV/0!								#DIV/0!				#DIV/0!
		0	0	#DIV/0!	0	0	#DIV/0!		0	0	#DIV/0!				#DIV/0!				#DIV/0!				#DIV/0!				#DIV/0!				#DIV/0!				#DIV/0!								#DIV/0!				#DIV/0!
		0	0	#DIV/0!	0	0	#DIV/0!		0	0	#DIV/0!				#DIV/0!				#DIV/0!				#DIV/0!				#DIV/0!				#DIV/0!				#DIV/0!								#DIV/0!				#DIV/0!
		0	0	#DIV/0!	0	0	#DIV/0!		0	0	#DIV/0!				#DIV/0!				#DIV/0!				#DIV/0!				#DIV/0!				#DIV/0!				#DIV/0!								#DIV/0!				#DIV/0!
		0	0	#DIV/0!	0	0	#DIV/0!		0	0	#DIV/0!				#DIV/0!				#DIV/0!				#DIV/0!				#DIV/0!				#DIV/0!				#DIV/0!								#DIV/0!				#DIV/0!
		0	0	#DIV/0!	0	0	#DIV/0!		0	0	#DIV/0!				#DIV/0!				#DIV/0!				#DIV/0!				#DIV/0!				#DIV/0!				#DIV/0!								#DIV/0!				#DIV/0!
		0	0	#DIV/0!	0	0	#DIV/0!		0	0	#DIV/0!				#DIV/0!				#DIV/0!				#DIV/0!				#DIV/0!				#DIV/0!				#DIV/0!								#DIV/0!				#DIV/0!
		0	0	#DIV/0!	0	0	#DIV/0!		0	0	#DIV/0!				#DIV/0!				#DIV/0!				#DIV/0!				#DIV/0!				#DIV/0!				#DIV/0!								#DIV/0!				#DIV/0!
		0	0	#DIV/0!	0	0	#DIV/0!		0	0	#DIV/0!				#DIV/0!				#DIV/0!				#DIV/0!				#DIV/0!				#DIV/0!				#DIV/0!								#DIV/0!				#DIV/0!
		0	0	#DIV/0!	0	0	#DIV/0!		0	0	#DIV/0!				#DIV/0!				#DIV/0!				#DIV/0!				#DIV/0!				#DIV/0!				#DIV/0!								#DIV/0!				#DIV/0!
		0	0	#DIV/0!	0	0	#DIV/0!		0	0	#DIV/0!				#DIV/0!				#DIV/0!				#DIV/0!				#DIV/0!				#DIV/0!				#DIV/0!								#DIV/0!				#DIV/0!
		0	0	#DIV/0!	0	0	#DIV/0!		0	0	#DIV/0!				#DIV/0!				#DIV/0!				#DIV/0!				#DIV/0!				#DIV/0!				#DIV/0!								#DIV/0!				#DIV/0!
		0	0	#DIV/0!	0	0	#DIV/0!		0	0	#DIV/0!				#DIV/0!				#DIV/0!				#DIV/0!				#DIV/0!				#DIV/0!				#DIV/0!								#DIV/0!				#DIV/0!
		0	0	#DIV/0!	0	0	#DIV/0!		0	0	#DIV/0!				#DIV/0!				#DIV/0!				#DIV/0!				#DIV/0!				#DIV/0!				#DIV/0!								#DIV/0!				#DIV/0!
		0	0	#DIV/0!	0	0	#DIV/0!		0	0	#DIV/0!				#DIV/0!				#DIV/0!				#DIV/0!				#DIV/0!				#DIV/0!				#DIV/0!								#DIV/0!				#DIV/0!
		0	0	#DIV/0!	0	0	#DIV/0!		0	0	#DIV/0!				#DIV/0!				#DIV/0!				#DIV/0!				#DIV/0!				#DIV/0!				#DIV/0!								#DIV/0!				#DIV/0!
		0	0	#DIV/0!	0	0	#DIV/0!		0	0	#DIV/0!				#DIV/0!				#DIV/0!				#DIV/0!				#DIV/0!				#DIV/0!				#DIV/0!								#DIV/0!				#DIV/0!
		0	0	#DIV/0!	0	0	#DIV/0!		0	0	#DIV/0!				#DIV/0!				#DIV/0!				#DIV/0!				#DIV/0!				#DIV/0!				#DIV/0!								#DIV/0!				#DIV/0!
		0	0	#DIV/0!	0	0	#DIV/0!		0	0	#DIV/0!				#DIV/0!				#DIV/0!				#DIV/0!				#DIV/0!				#DIV/0!				#DIV/0!								#DIV/0!				#DIV/0!
		0	0	#DIV/0!	0	0	#DIV/0!		0	0	#DIV/0!				#DIV/0!				#DIV/0!				#DIV/0!				#DIV/0!				#DIV/0!				#DIV/0!								#DIV/0!				#DIV/0!
		0	0	#DIV/0!	0	0	#DIV/0!		0	0	#DIV/0!				#DIV/0!				#DIV/0!				#DIV/0!				#DIV/0!				#DIV/0!				#DIV/0!								#DIV/0!				#DIV/0!
		0	0	#DIV/0!	0	0	#DIV/0!		0	0	#DIV/0!				#DIV/0!				#DIV/0!				#DIV/0!				#DIV/0!				#DIV/0!				#DIV/0!								#DIV/0!				#DIV/0!
		0	0	#DIV/0!	0	0	#DIV/0!		0	0	#DIV/0!				#DIV/0!				#DIV/0!				#DIV/0!				#DIV/0!				#DIV/0!				#DIV/0!								#DIV/0!				#DIV/0!
		0	0	#DIV/0!	0	0	#DIV/0!		0	0	#DIV/0!				#DIV/0!				#DIV/0!				#DIV/0!				#DIV/0!				#DIV/0!				#DIV/0!								#DIV/0!				#DIV/0!
		0	0	#DIV/0!	0	0	#DIV/0!		0	0	#DIV/0!				#DIV/0!				#DIV/0!				#DIV/0!				#DIV/0!				#DIV/0!				#DIV/0!								#DIV/0!				#DIV/0!
		0	0	#DIV/0!	0	0	#DIV/0!		0	0	#DIV/0!				#DIV/0!				#DIV/0!				#DIV/0!				#DIV/0!				#DIV/0!				#DIV/0!								#DIV/0!				#DIV/0!
		0	0	#DIV/0!	0	0	#DIV/0!		0	0	#DIV/0!				#DIV/0!				#DIV/0!				#DIV/0!				#DIV/0!				#DIV/0!				#DIV/0!								#DIV/0!				#DIV/0!
		0	0	#DIV/0!	0	0	#DIV/0!		0	0	#DIV/0!				#DIV/0!				#DIV/0!				#DIV/0!				#DIV/0!				#DIV/0!				#DIV/0!								#DIV/0!				#DIV/0!
		0	0	#DIV/0!	0	0	#DIV/0!		0	0	#DIV/0!				#DIV/0!				#DIV/0!				#DIV/0!				#DIV/0!				#DIV/0!				#DIV/0!								#DIV/0!				#DIV/0!
		0	0	#DIV/0!	0	0	#DIV/0!		0	0	#DIV/0!				#DIV/0!				#DIV/0!				#DIV/0!				#DIV/0!				#DIV/0!				#DIV/0!								#DIV/0!				#DIV/0!
		0	0	#DIV/0!	0	0	#DIV/0!		0	0	#DIV/0!				#DIV/0!				#DIV/0!				#DIV/0!				#DIV/0!				#DIV/0!				#DIV/0!								#DIV/0!				#DIV/0!
		0	0	#DIV/0!	0	0	#DIV/0!		0	0	#DIV/0!				#DIV/0!				#DIV/0!				#DIV/0!				#DIV/0!				#DIV/0!				#DIV/0!								#DIV/0!				#DIV/0!
		0	0	#DIV/0!	0	0	#DIV/0!		0	0	#DIV/0!				#DIV/0!				#DIV/0!				#DIV/0!				#DIV/0!				#DIV/0!				#DIV/0!								#DIV/0!				#DIV/0!
		0	0	#DIV/0!	0	0	#DIV/0!		0	0	#DIV/0!				#DIV/0!				#DIV/0!				#DIV/0!				#DIV/0!				#DIV/0!				#DIV/0!								#DIV/0!				#DIV/0!
		0	0	#DIV/0!	0	0	#DIV/0!		0	0	#DIV/0!				#DIV/0!				#DIV/0!				#DIV/0!				#DIV/0!				#DIV/0!				#DIV/0!								#DIV/0!				#DIV/0!
		0	0	#DIV/0!	0	0	#DIV/0!		0	0	#DIV/0!				#DIV/0!				#DIV/0!				#DIV/0!				#DIV/0!				#DIV/0!				#DIV/0!								#DIV/0!				#DIV/0!
		0	0	#DIV/0!	0	0	#DIV/0!		0	0	#DIV/0!				#DIV/0!				#DIV/0!				#DIV/0!				#DIV/0!				#DIV/0!				#DIV/0!								#DIV/0!				#DIV/0!
		0	0	#DIV/0!	0	0	#DIV/0!		0	0	#DIV/0!				#DIV/0!				#DIV/0!				#DIV/0!				#DIV/0!				#DIV/0!				#DIV/0!								#DIV/0!				#DIV/0!
		0	0	#DIV/0!	0	0	#DIV/0!		0	0	#DIV/0!				#DIV/0!				#DIV/0!				#DIV/0!				#DIV/0!				#DIV/0!				#DIV/0!								#DIV/0!				#DIV/0!
		0	0	#DIV/0!	0	0	#DIV/0!		0	0	#DIV/0!				#DIV/0!				#DIV/0!				#DIV/0!				#DIV/0!				#DIV/0!				#DIV/0!								#DIV/0!				#DIV/0!
		0	0	#DIV/0!	0	0	#DIV/0!		0	0	#DIV/0!				#DIV/0!				#DIV/0!				#DIV/0!				#DIV/0!				#DIV/0!				#DIV/0!								#DIV/0!				#DIV/0!
		0	0	#DIV/0!	0	0	#DIV/0!		0	0	#DIV/0!				#DIV/0!				#DIV/0!				#DIV/0!				#DIV/0!				#DIV/0!				#DIV/0!								#DIV/0!				#DIV/0!
		0	0	#DIV/0!	0	0	#DIV/0!		0	0	#DIV/0!				#DIV/0!				#DIV/0!				#DIV/0!				#DIV/0!				#DIV/0!				#DIV/0!								#DIV/0!				#DIV/0!
		0	0	#DIV/0!	0	0	#DIV/0!		0	0	#DIV/0!				#DIV/0!				#DIV/0!				#DIV/0!				#DIV/0!				#DIV/0!				#DIV/0!								#DIV/0!				#DIV/0!
		0	0	#DIV/0!	0	0	#DIV/0!		0	0	#DIV/0!				#DIV/0!				#DIV/0!				#DIV/0!				#DIV/0!				#DIV/0!				#DIV/0!								#DIV/0!				#DIV/0!
		0	0	#DIV/0!	0	0	#DIV/0!		0	0	#DIV/0!				#DIV/0!				#DIV/0!				#DIV/0!				#DIV/0!				#DIV/0!				#DIV/0!								#DIV/0!				#DIV/0!
		0	0	#DIV/0!	0	0	#DIV/0!		0	0	#DIV/0!				#DIV/0!				#DIV/0!				#DIV/0!				#DIV/0!				#DIV/0!				#DIV/0!								#DIV/0!				#DIV/0!
		0	0	#DIV/0!	0	0	#DIV/0!		0	0	#DIV/0!				#DIV/0!				#DIV/0!				#DIV/0!				#DIV/0!				#DIV/0!				#DIV/0!								#DIV/0!				#DIV/0!
		0	0	#DIV/0!	0	0	#DIV/0!		0	0	#DIV/0!				#DIV/0!				#DIV/0!				#DIV/0!				#DIV/0!				#DIV/0!				#DIV/0!								#DIV/0!				#DIV/0!
		0	0	#DIV/0!	0	0	#DIV/0!		0	0	#DIV/0!				#DIV/0!				#DIV/0!				#DIV/0!				#DIV/0!				#DIV/0!				#DIV/0!								#DIV/0!				#DIV/0!
		0	0	#DIV/0!	0	0	#DIV/0!		0	0	#DIV/0!				#DIV/0!				#DIV/0!				#DIV/0!				#DIV/0!				#DIV/0!				#DIV/0!								#DIV/0!				#DIV/0!
		0	0	#DIV/0!	0	0	#DIV/0!		0	0	#DIV/0!				#DIV/0!				#DIV/0!				#DIV/0!				#DIV/0!				#DIV/0!				#DIV/0!								#DIV/0!				#DIV/0!
		0	0	#DIV/0!	0	0	#DIV/0!		0	0	#DIV/0!				#DIV/0!				#DIV/0!				#DIV/0!				#DIV/0!				#DIV/0!				#DIV/0!								#DIV/0!				#DIV/0!
		0	0	#DIV/0!	0	0	#DIV/0!		0	0	#DIV/0!				#DIV/0!				#DIV/0!				#DIV/0!				#DIV/0!				#DIV/0!				#DIV/0!								#DIV/0!				#DIV/0!
		0	0	#DIV/0!	0	0	#DIV/0!		0	0	#DIV/0!				#DIV/0!				#DIV/0!				#DIV/0!				#DIV/0!				#DIV/0!				#DIV/0!								#DIV/0!				#DIV/0!
		0	0	#DIV/0!	0	0	#DIV/0!		0	0	#DIV/0!				#DIV/0!				#DIV/0!				#DIV/0!				#DIV/0!				#DIV/0!				#DIV/0!								#DIV/0!				#DIV/0!
		0	0	#DIV/0!	0	0	#DIV/0!		0	0	#DIV/0!				#DIV/0!				#DIV/0!				#DIV/0!				#DIV/0!				#DIV/0!				#DIV/0!								#DIV/0!				#DIV/0!
		0	0	#DIV/0!	0	0	#DIV/0!		0	0	#DIV/0!				#DIV/0!				#DIV/0!				#DIV/0!				#DIV/0!				#DIV/0!				#DIV/0!								#DIV/0!				#DIV/0!
		0	0	#DIV/0!	0	0	#DIV/0!		0	0	#DIV/0!				#DIV/0!				#DIV/0!				#DIV/0!				#DIV/0!				#DIV/0!				#DIV/0!								#DIV/0!				#DIV/0!
		0	0	#DIV/0!	0	0	#DIV/0!		0	0	#DIV/0!				#DIV/0!				#DIV/0!				#DIV/0!				#DIV/0!				#DIV/0!				#DIV/0!								#DIV/0!				#DIV/0!
		0	0	#DIV/0!	0	0	#DIV/0!		0	0	#DIV/0!				#DIV/0!				#DIV/0!				#DIV/0!				#DIV/0!				#DIV/0!				#DIV/0!								#DIV/0!				#DIV/0!
		0	0	#DIV/0!	0	0	#DIV/0!		0	0	#DIV/0!				#DIV/0!				#DIV/0!				#DIV/0!				#DIV/0!				#DIV/0!				#DIV/0!								#DIV/0!				#DIV/0!
		0	0	#DIV/0!	0	0	#DIV/0!		0	0	#DIV/0!				#DIV/0!				#DIV/0!				#DIV/0!				#DIV/0!				#DIV/0!				#DIV/0!								#DIV/0!				#DIV/0!
		0	0	#DIV/0!	0	0	#DIV/0!		0	0	#DIV/0!				#DIV/0!				#DIV/0!				#DIV/0!				#DIV/0!				#DIV/0!				#DIV/0!								#DIV/0!				#DIV/0!
		0	0	#DIV/0!	0	0	#DIV/0!		0	0	#DIV/0!				#DIV/0!				#DIV/0!				#DIV/0!				#DIV/0!				#DIV/0!				#DIV/0!								#DIV/0!				#DIV/0!
		0	0	#DIV/0!	0	0	#DIV/0!		0	0	#DIV/0!				#DIV/0!				#DIV/0!				#DIV/0!				#DIV/0!				#DIV/0!				#DIV/0!								#DIV/0!				#DIV/0!
		0	0	#DIV/0!	0	0	#DIV/0!		0	0	#DIV/0!				#DIV/0!				#DIV/0!				#DIV/0!				#DIV/0!				#DIV/0!				#DIV/0!								#DIV/0!				#DIV/0!
		0	0	#DIV/0!	0	0	#DIV/0!		0	0	#DIV/0!				#DIV/0!				#DIV/0!				#DIV/0!				#DIV/0!				#DIV/0!				#DIV/0!								#DIV/0!				#DIV/0!
		0	0	#DIV/0!	0	0	#DIV/0!		0	0	#DIV/0!				#DIV/0!				#DIV/0!				#DIV/0!				#DIV/0!				#DIV/0!				#DIV/0!								#DIV/0!				#DIV/0!
		0	0	#DIV/0!	0	0	#DIV/0!		0	0	#DIV/0!				#DIV/0!				#DIV/0!				#DIV/0!				#DIV/0!				#DIV/0!				#DIV/0!								#DIV/0!				#DIV/0!
		0	0	#DIV/0!	0	0	#DIV/0!		0	0	#DIV/0!				#DIV/0!				#DIV/0!				#DIV/0!				#DIV/0!				#DIV/0!				#DIV/0!								#DIV/0!				#DIV/0!
		0	0	#DIV/0!	0	0	#DIV/0!		0	0	#DIV/0!				#DIV/0!				#DIV/0!				#DIV/0!				#DIV/0!				#DIV/0!				#DIV/0!								#DIV/0!				#DIV/0!
		0	0	#DIV/0!	0	0	#DIV/0!		0	0	#DIV/0!				#DIV/0!				#DIV/0!				#DIV/0!				#DIV/0!				#DIV/0!				#DIV/0!								#DIV/0!				#DIV/0!
		0	0	#DIV/0!	0	0	#DIV/0!		0	0	#DIV/0!				#DIV/0!				#DIV/0!				#DIV/0!				#DIV/0!				#DIV/0!				#DIV/0!								#DIV/0!				#DIV/0!
		0	0	#DIV/0!	0	0	#DIV/0!		0	0	#DIV/0!				#DIV/0!				#DIV/0!				#DIV/0!				#DIV/0!				#DIV/0!				#DIV/0!								#DIV/0!				#DIV/0!
		0	0	#DIV/0!	0	0	#DIV/0!		0	0	#DIV/0!				#DIV/0!				#DIV/0!				#DIV/0!				#DIV/0!				#DIV/0!				#DIV/0!								#DIV/0!				#DIV/0!
		0	0	#DIV/0!	0	0	#DIV/0!		0	0	#DIV/0!				#DIV/0!				#DIV/0!				#DIV/0!				#DIV/0!				#DIV/0!				#DIV/0!								#DIV/0!				#DIV/0!
		0	0	#DIV/0!	0	0	#DIV/0!		0	0	#DIV/0!				#DIV/0!				#DIV/0!				#DIV/0!				#DIV/0!				#DIV/0!				#DIV/0!								#DIV/0!				#DIV/0!
		0	0	#DIV/0!	0	0	#DIV/0!		0	0	#DIV/0!				#DIV/0!				#DIV/0!				#DIV/0!				#DIV/0!				#DIV/0!				#DIV/0!								#DIV/0!				#DIV/0!
		0	0	#DIV/0!	0	0	#DIV/0!		0	0	#DIV/0!				#DIV/0!				#DIV/0!				#DIV/0!				#DIV/0!				#DIV/0!				#DIV/0!								#DIV/0!				#DIV/0!
		0	0	#DIV/0!	0	0	#DIV/0!		0	0	#DIV/0!				#DIV/0!				#DIV/0!				#DIV/0!				#DIV/0!				#DIV/0!				#DIV/0!								#DIV/0!				#DIV/0!
		0	0	#DIV/0!	0	0	#DIV/0!		0	0	#DIV/0!				#DIV/0!				#DIV/0!				#DIV/0!				#DIV/0!				#DIV/0!				#DIV/0!								#DIV/0!				#DIV/0!
		0	0	#DIV/0!	0	0	#DIV/0!		0	0	#DIV/0!				#DIV/0!				#DIV/0!				#DIV/0!				#DIV/0!				#DIV/0!				#DIV/0!								#DIV/0!				#DIV/0!
		0	0	#DIV/0!	0	0	#DIV/0!		0	0	#DIV/0!				#DIV/0!				#DIV/0!				#DIV/0!				#DIV/0!				#DIV/0!				#DIV/0!								#DIV/0!				#DIV/0!
		0	0	#DIV/0!	0	0	#DIV/0!		0	0	#DIV/0!				#DIV/0!				#DIV/0!				#DIV/0!				#DIV/0!				#DIV/0!				#DIV/0!								#DIV/0!				#DIV/0!
		0	0	#DIV/0!	0	0	#DIV/0!		0	0	#DIV/0!				#DIV/0!				#DIV/0!				#DIV/0!				#DIV/0!				#DIV/0!				#DIV/0!								#DIV/0!				#DIV/0!
		0	0	#DIV/0!	0	0	#DIV/0!		0	0	#DIV/0!				#DIV/0!				#DIV/0!				#DIV/0!				#DIV/0!				#DIV/0!				#DIV/0!								#DIV/0!				#DIV/0!
		0	0	#DIV/0!	0	0	#DIV/0!		0	0	#DIV/0!				#DIV/0!				#DIV/0!				#DIV/0!				#DIV/0!				#DIV/0!				#DIV/0!								#DIV/0!				#DIV/0!
		0	0	#DIV/0!	0	0	#DIV/0!		0	0	#DIV/0!				#DIV/0!				#DIV/0!				#DIV/0!				#DIV/0!				#DIV/0!				#DIV/0!								#DIV/0!				#DIV/0!
		0	0	#DIV/0!	0	0	#DIV/0!		0	0	#DIV/0!				#DIV/0!				#DIV/0!				#DIV/0!				#DIV/0!				#DIV/0!				#DIV/0!								#DIV/0!				#DIV/0!
		0	0	#DIV/0!	0	0	#DIV/0!		0	0	#DIV/0!				#DIV/0!				#DIV/0!				#DIV/0!				#DIV/0!				#DIV/0!				#DIV/0!								#DIV/0!				#DIV/0!
		0	0	#DIV/0!	0	0	#DIV/0!		0	0	#DIV/0!				#DIV/0!				#DIV/0!				#DIV/0!				#DIV/0!				#DIV/0!				#DIV/0!								#DIV/0!				#DIV/0!
		0	0	#DIV/0!	0	0	#DIV/0!		0	0	#DIV/0!				#DIV/0!				#DIV/0!				#DIV/0!				#DIV/0!				#DIV/0!				#DIV/0!								#DIV/0!				#DIV/0!
		0	0	#DIV/0!	0	0	#DIV/0!		0	0	#DIV/0!				#DIV/0!				#DIV/0!				#DIV/0!				#DIV/0!				#DIV/0!				#DIV/0!								#DIV/0!				#DIV/0!
		0	0	#DIV/0!	0	0	#DIV/0!		0	0	#DIV/0!				#DIV/0!				#DIV/0!				#DIV/0!				#DIV/0!				#DIV/0!				#DIV/0!								#DIV/0!				#DIV/0!
		0	0	#DIV/0!	0	0	#DIV/0!		0	0	#DIV/0!				#DIV/0!				#DIV/0!				#DIV/0!				#DIV/0!				#DIV/0!				#DIV/0!								#DIV/0!				#DIV/0!
		0	0	#DIV/0!	0	0	#DIV/0!		0	0	#DIV/0!				#DIV/0!				#DIV/0!				#DIV/0!				#DIV/0!				#DIV/0!				#DIV/0!								#DIV/0!				#DIV/0!
		0	0	#DIV/0!	0	0	#DIV/0!		0	0	#DIV/0!				#DIV/0!				#DIV/0!				#DIV/0!				#DIV/0!				#DIV/0!				#DIV/0!								#DIV/0!				#DIV/0!
		0	0	#DIV/0!	0	0	#DIV/0!		0	0	#DIV/0!				#DIV/0!				#DIV/0!				#DIV/0!				#DIV/0!				#DIV/0!				#DIV/0!								#DIV/0!				#DIV/0!
		0	0	#DIV/0!	0	0	#DIV/0!		0	0	#DIV/0!				#DIV/0!				#DIV/0!				#DIV/0!				#DIV/0!				#DIV/0!				#DIV/0!								#DIV/0!				#DIV/0!
		0	0	#DIV/0!	0	0	#DIV/0!		0	0	#DIV/0!				#DIV/0!				#DIV/0!				#DIV/0!				#DIV/0!				#DIV/0!				#DIV/0!								#DIV/0!				#DIV/0!
		0	0	#DIV/0!	0	0	#DIV/0!		0	0	#DIV/0!				#DIV/0!				#DIV/0!				#DIV/0!				#DIV/0!				#DIV/0!				#DIV/0!								#DIV/0!				#DIV/0!
		0	0	#DIV/0!	0	0	#DIV/0!		0	0	#DIV/0!				#DIV/0!				#DIV/0!				#DIV/0!				#DIV/0!				#DIV/0!				#DIV/0!								#DIV/0!				#DIV/0!
		0	0	#DIV/0!	0	0	#DIV/0!		0	0	#DIV/0!				#DIV/0!				#DIV/0!				#DIV/0!				#DIV/0!				#DIV/0!				#DIV/0!								#DIV/0!				#DIV/0!
		0	0	#DIV/0!	0	0	#DIV/0!		0	0	#DIV/0!				#DIV/0!				#DIV/0!				#DIV/0!				#DIV/0!				#DIV/0!				#DIV/0!								#DIV/0!				#DIV/0!
		0	0	#DIV/0!	0	0	#DIV/0!		0	0	#DIV/0!				#DIV/0!				#DIV/0!				#DIV/0!				#DIV/0!				#DIV/0!				#DIV/0!								#DIV/0!				#DIV/0!
		0	0	#DIV/0!	0	0	#DIV/0!		0	0	#DIV/0!				#DIV/0!				#DIV/0!				#DIV/0!				#DIV/0!				#DIV/0!				#DIV/0!								#DIV/0!				#DIV/0!
		0	0	#DIV/0!	0	0	#DIV/0!		0	0	#DIV/0!				#DIV/0!				#DIV/0!				#DIV/0!				#DIV/0!				#DIV/0!				#DIV/0!								#DIV/0!				#DIV/0!
		0	0	#DIV/0!	0	0	#DIV/0!		0	0	#DIV/0!				#DIV/0!				#DIV/0!				#DIV/0!				#DIV/0!				#DIV/0!				#DIV/0!								#DIV/0!				#DIV/0!
		0	0	#DIV/0!	0	0	#DIV/0!		0	0	#DIV/0!				#DIV/0!				#DIV/0!				#DIV/0!				#DIV/0!				#DIV/0!				#DIV/0!								#DIV/0!				#DIV/0!
		0	0	#DIV/0!	0	0	#DIV/0!		0	0	#DIV/0!				#DIV/0!				#DIV/0!				#DIV/0!				#DIV/0!				#DIV/0!				#DIV/0!								#DIV/0!				#DIV/0!
		0	0	#DIV/0!	0	0	#DIV/0!		0	0	#DIV/0!				#DIV/0!				#DIV/0!				#DIV/0!				#DIV/0!				#DIV/0!				#DIV/0!								#DIV/0!				#DIV/0!
		0	0	#DIV/0!	0	0	#DIV/0!		0	0	#DIV/0!				#DIV/0!				#DIV/0!				#DIV/0!				#DIV/0!				#DIV/0!				#DIV/0!								#DIV/0!				#DIV/0!
		0	0	#DIV/0!	0	0	#DIV/0!		0	0	#DIV/0!				#DIV/0!				#DIV/0!				#DIV/0!				#DIV/0!				#DIV/0!				#DIV/0!								#DIV/0!				#DIV/0!
		0	0	#DIV/0!	0	0	#DIV/0!		0	0	#DIV/0!				#DIV/0!				#DIV/0!				#DIV/0!				#DIV/0!				#DIV/0!				#DIV/0!								#DIV/0!				#DIV/0!
		0	0	#DIV/0!	0	0	#DIV/0!		0	0	#DIV/0!				#DIV/0!				#DIV/0!				#DIV/0!				#DIV/0!				#DIV/0!				#DIV/0!								#DIV/0!				#DIV/0!
		0	0	#DIV/0!	0	0	#DIV/0!		0	0	#DIV/0!				#DIV/0!				#DIV/0!				#DIV/0!				#DIV/0!				#DIV/0!				#DIV/0!								#DIV/0!				#DIV/0!
		0	0	#DIV/0!	0	0	#DIV/0!		0	0	#DIV/0!				#DIV/0!				#DIV/0!				#DIV/0!				#DIV/0!				#DIV/0!				#DIV/0!								#DIV/0!				#DIV/0!
		0	0	#DIV/0!	0	0	#DIV/0!		0	0	#DIV/0!				#DIV/0!				#DIV/0!				#DIV/0!				#DIV/0!				#DIV/0!				#DIV/0!								#DIV/0!				#DIV/0!
		0	0	#DIV/0!	0	0	#DIV/0!		0	0	#DIV/0!				#DIV/0!				#DIV/0!				#DIV/0!				#DIV/0!				#DIV/0!				#DIV/0!								#DIV/0!				#DIV/0!
		0	0	#DIV/0!	0	0	#DIV/0!		0	0	#DIV/0!				#DIV/0!				#DIV/0!				#DIV/0!				#DIV/0!				#DIV/0!				#DIV/0!								#DIV/0!				#DIV/0!
		0	0	#DIV/0!	0	0	#DIV/0!		0	0	#DIV/0!				#DIV/0!				#DIV/0!				#DIV/0!				#DIV/0!				#DIV/0!				#DIV/0!								#DIV/0!				#DIV/0!
		0	0	#DIV/0!	0	0	#DIV/0!		0	0	#DIV/0!				#DIV/0!				#DIV/0!				#DIV/0!				#DIV/0!				#DIV/0!				#DIV/0!								#DIV/0!				#DIV/0!
		0	0	#DIV/0!	0	0	#DIV/0!		0	0	#DIV/0!				#DIV/0!				#DIV/0!				#DIV/0!				#DIV/0!				#DIV/0!				#DIV/0!								#DIV/0!				#DIV/0!
		0	0	#DIV/0!	0	0	#DIV/0!		0	0	#DIV/0!				#DIV/0!				#DIV/0!				#DIV/0!				#DIV/0!				#DIV/0!				#DIV/0!								#DIV/0!				#DIV/0!
		0	0	#DIV/0!	0	0	#DIV/0!		0	0	#DIV/0!				#DIV/0!				#DIV/0!				#DIV/0!				#DIV/0!				#DIV/0!				#DIV/0!								#DIV/0!				#DIV/0!
		0	0	#DIV/0!	0	0	#DIV/0!		0	0	#DIV/0!				#DIV/0!				#DIV/0!				#DIV/0!				#DIV/0!				#DIV/0!				#DIV/0!								#DIV/0!				#DIV/0!
		0	0	#DIV/0!	0	0	#DIV/0!		0	0	#DIV/0!				#DIV/0!				#DIV/0!				#DIV/0!				#DIV/0!				#DIV/0!				#DIV/0!								#DIV/0!				#DIV/0!
		0	0	#DIV/0!	0	0	#DIV/0!		0	0	#DIV/0!				#DIV/0!				#DIV/0!				#DIV/0!				#DIV/0!				#DIV/0!				#DIV/0!								#DIV/0!				#DIV/0!
		0	0	#DIV/0!	0	0	#DIV/0!		0	0	#DIV/0!				#DIV/0!				#DIV/0!				#DIV/0!				#DIV/0!				#DIV/0!				#DIV/0!								#DIV/0!				#DIV/0!
		0	0	#DIV/0!	0	0	#DIV/0!		0	0	#DIV/0!				#DIV/0!				#DIV/0!				#DIV/0!				#DIV/0!				#DIV/0!				#DIV/0!								#DIV/0!				#DIV/0!
		0	0	#DIV/0!	0	0	#DIV/0!		0	0	#DIV/0!				#DIV/0!				#DIV/0!				#DIV/0!				#DIV/0!				#DIV/0!				#DIV/0!								#DIV/0!				#DIV/0!
		0	0	#DIV/0!	0	0	#DIV/0!		0	0	#DIV/0!				#DIV/0!				#DIV/0!				#DIV/0!				#DIV/0!				#DIV/0!				#DIV/0!								#DIV/0!				#DIV/0!
		0	0	#DIV/0!	0	0	#DIV/0!		0	0	#DIV/0!				#DIV/0!				#DIV/0!				#DIV/0!				#DIV/0!				#DIV/0!				#DIV/0!								#DIV/0!				#DIV/0!
		0	0	#DIV/0!	0	0	#DIV/0!		0	0	#DIV/0!				#DIV/0!				#DIV/0!				#DIV/0!				#DIV/0!				#DIV/0!				#DIV/0!								#DIV/0!				#DIV/0!
		0	0	#DIV/0!	0	0	#DIV/0!		0	0	#DIV/0!				#DIV/0!				#DIV/0!				#DIV/0!				#DIV/0!				#DIV/0!				#DIV/0!								#DIV/0!				#DIV/0!
		0	0	#DIV/0!	0	0	#DIV/0!		0	0	#DIV/0!				#DIV/0!				#DIV/0!				#DIV/0!				#DIV/0!				#DIV/0!				#DIV/0!								#DIV/0!				#DIV/0!
		0	0	#DIV/0!	0	0	#DIV/0!		0	0	#DIV/0!				#DIV/0!				#DIV/0!				#DIV/0!				#DIV/0!				#DIV/0!				#DIV/0!								#DIV/0!				#DIV/0!
		0	0	#DIV/0!	0	0	#DIV/0!		0	0	#DIV/0!				#DIV/0!				#DIV/0!				#DIV/0!				#DIV/0!				#DIV/0!				#DIV/0!								#DIV/0!				#DIV/0!
		0	0	#DIV/0!	0	0	#DIV/0!		0	0	#DIV/0!				#DIV/0!				#DIV/0!				#DIV/0!				#DIV/0!				#DIV/0!				#DIV/0!								#DIV/0!				#DIV/0!
		0	0	#DIV/0!	0	0	#DIV/0!		0	0	#DIV/0!				#DIV/0!				#DIV/0!				#DIV/0!				#DIV/0!				#DIV/0!				#DIV/0!								#DIV/0!				#DIV/0!
		0	0	#DIV/0!	0	0	#DIV/0!		0	0	#DIV/0!				#DIV/0!				#DIV/0!				#DIV/0!				#DIV/0!				#DIV/0!				#DIV/0!								#DIV/0!				#DIV/0!
		0	0	#DIV/0!	0	0	#DIV/0!		0	0	#DIV/0!				#DIV/0!				#DIV/0!				#DIV/0!				#DIV/0!				#DIV/0!				#DIV/0!								#DIV/0!				#DIV/0!
		0	0	#DIV/0!	0	0	#DIV/0!		0	0	#DIV/0!				#DIV/0!				#DIV/0!				#DIV/0!				#DIV/0!				#DIV/0!				#DIV/0!								#DIV/0!				#DIV/0!
		0	0	#DIV/0!	0	0	#DIV/0!		0	0	#DIV/0!				#DIV/0!				#DIV/0!				#DIV/0!				#DIV/0!				#DIV/0!				#DIV/0!								#DIV/0!				#DIV/0!
		0	0	#DIV/0!	0	0	#DIV/0!		0	0	#DIV/0!				#DIV/0!				#DIV/0!				#DIV/0!				#DIV/0!				#DIV/0!				#DIV/0!								#DIV/0!				#DIV/0!
		0	0	#DIV/0!	0	0	#DIV/0!		0	0	#DIV/0!				#DIV/0!				#DIV/0!				#DIV/0!				#DIV/0!				#DIV/0!				#DIV/0!								#DIV/0!				#DIV/0!
		0	0	#DIV/0!	0	0	#DIV/0!		0	0	#DIV/0!				#DIV/0!				#DIV/0!				#DIV/0!				#DIV/0!				#DIV/0!				#DIV/0!								#DIV/0!				#DIV/0!
		0	0	#DIV/0!	0	0	#DIV/0!		0	0	#DIV/0!				#DIV/0!				#DIV/0!				#DIV/0!				#DIV/0!				#DIV/0!				#DIV/0!								#DIV/0!				#DIV/0!
		0	0	#DIV/0!	0	0	#DIV/0!		0	0	#DIV/0!				#DIV/0!				#DIV/0!				#DIV/0!				#DIV/0!				#DIV/0!				#DIV/0!								#DIV/0!				#DIV/0!
		0	0	#DIV/0!	0	0	#DIV/0!		0	0	#DIV/0!				#DIV/0!				#DIV/0!				#DIV/0!				#DIV/0!				#DIV/0!				#DIV/0!								#DIV/0!				#DIV/0!
		0	0	#DIV/0!	0	0	#DIV/0!		0	0	#DIV/0!				#DIV/0!				#DIV/0!				#DIV/0!				#DIV/0!				#DIV/0!				#DIV/0!								#DIV/0!				#DIV/0!
		0	0	#DIV/0!	0	0	#DIV/0!		0	0	#DIV/0!				#DIV/0!				#DIV/0!				#DIV/0!				#DIV/0!				#DIV/0!				#DIV/0!								#DIV/0!				#DIV/0!
		0	0	#DIV/0!	0	0	#DIV/0!		0	0	#DIV/0!				#DIV/0!				#DIV/0!				#DIV/0!				#DIV/0!				#DIV/0!				#DIV/0!								#DIV/0!				#DIV/0!
		0	0	#DIV/0!	0	0	#DIV/0!		0	0	#DIV/0!				#DIV/0!				#DIV/0!				#DIV/0!				#DIV/0!				#DIV/0!				#DIV/0!								#DIV/0!				#DIV/0!
		0	0	#DIV/0!	0	0	#DIV/0!		0	0	#DIV/0!				#DIV/0!				#DIV/0!				#DIV/0!				#DIV/0!				#DIV/0!				#DIV/0!								#DIV/0!				#DIV/0!
		0	0	#DIV/0!	0	0	#DIV/0!		0	0	#DIV/0!				#DIV/0!				#DIV/0!				#DIV/0!				#DIV/0!				#DIV/0!				#DIV/0!								#DIV/0!				#DIV/0!
		0	0	#DIV/0!	0	0	#DIV/0!		0	0	#DIV/0!				#DIV/0!				#DIV/0!				#DIV/0!				#DIV/0!				#DIV/0!				#DIV/0!								#DIV/0!				#DIV/0!
		0	0	#DIV/0!	0	0	#DIV/0!		0	0	#DIV/0!				#DIV/0!				#DIV/0!				#DIV/0!				#DIV/0!				#DIV/0!				#DIV/0!								#DIV/0!				#DIV/0!
		0	0	#DIV/0!	0	0	#DIV/0!		0	0	#DIV/0!				#DIV/0!				#DIV/0!				#DIV/0!				#DIV/0!				#DIV/0!				#DIV/0!								#DIV/0!				#DIV/0!
		0	0	#DIV/0!	0	0	#DIV/0!		0	0	#DIV/0!				#DIV/0!				#DIV/0!				#DIV/0!				#DIV/0!				#DIV/0!				#DIV/0!								#DIV/0!				#DIV/0!
		0	0	#DIV/0!	0	0	#DIV/0!		0	0	#DIV/0!				#DIV/0!				#DIV/0!				#DIV/0!				#DIV/0!				#DIV/0!				#DIV/0!								#DIV/0!				#DIV/0!
		0	0	#DIV/0!	0	0	#DIV/0!		0	0	#DIV/0!				#DIV/0!				#DIV/0!				#DIV/0!				#DIV/0!				#DIV/0!				#DIV/0!								#DIV/0!				#DIV/0!
		0	0	#DIV/0!	0	0	#DIV/0!		0	0	#DIV/0!				#DIV/0!				#DIV/0!				#DIV/0!				#DIV/0!				#DIV/0!				#DIV/0!								#DIV/0!				#DIV/0!
		0	0	#DIV/0!	0	0	#DIV/0!		0	0	#DIV/0!				#DIV/0!				#DIV/0!				#DIV/0!				#DIV/0!				#DIV/0!				#DIV/0!								#DIV/0!				#DIV/0!
		0	0	#DIV/0!	0	0	#DIV/0!		0	0	#DIV/0!				#DIV/0!				#DIV/0!				#DIV/0!				#DIV/0!				#DIV/0!				#DIV/0!								#DIV/0!				#DIV/0!
		0	0	#DIV/0!	0	0	#DIV/0!		0	0	#DIV/0!				#DIV/0!				#DIV/0!				#DIV/0!				#DIV/0!				#DIV/0!				#DIV/0!								#DIV/0!				#DIV/0!
		0	0	#DIV/0!	0	0	#DIV/0!		0	0	#DIV/0!				#DIV/0!				#DIV/0!				#DIV/0!				#DIV/0!				#DIV/0!				#DIV/0!								#DIV/0!				#DIV/0!
		0	0	#DIV/0!	0	0	#DIV/0!		0	0	#DIV/0!				#DIV/0!				#DIV/0!				#DIV/0!				#DIV/0!				#DIV/0!				#DIV/0!								#DIV/0!				#DIV/0!
		0	0	#DIV/0!	0	0	#DIV/0!		0	0	#DIV/0!				#DIV/0!				#DIV/0!				#DIV/0!				#DIV/0!				#DIV/0!				#DIV/0!								#DIV/0!				#DIV/0!
		0	0	#DIV/0!	0	0	#DIV/0!		0	0	#DIV/0!				#DIV/0!				#DIV/0!				#DIV/0!				#DIV/0!				#DIV/0!				#DIV/0!								#DIV/0!				#DIV/0!
		0	0	#DIV/0!	0	0	#DIV/0!		0	0	#DIV/0!				#DIV/0!				#DIV/0!				#DIV/0!				#DIV/0!				#DIV/0!				#DIV/0!								#DIV/0!				#DIV/0!
		0	0	#DIV/0!	0	0	#DIV/0!		0	0	#DIV/0!				#DIV/0!				#DIV/0!				#DIV/0!				#DIV/0!				#DIV/0!				#DIV/0!								#DIV/0!				#DIV/0!
		0	0	#DIV/0!	0	0	#DIV/0!		0	0	#DIV/0!				#DIV/0!				#DIV/0!				#DIV/0!				#DIV/0!				#DIV/0!				#DIV/0!								#DIV/0!				#DIV/0!
		0	0	#DIV/0!	0	0	#DIV/0!		0	0	#DIV/0!				#DIV/0!				#DIV/0!				#DIV/0!				#DIV/0!				#DIV/0!				#DIV/0!								#DIV/0!				#DIV/0!
		0	0	#DIV/0!	0	0	#DIV/0!		0	0	#DIV/0!				#DIV/0!				#DIV/0!				#DIV/0!				#DIV/0!				#DIV/0!				#DIV/0!								#DIV/0!				#DIV/0!
		0	0	#DIV/0!	0	0	#DIV/0!		0	0	#DIV/0!				#DIV/0!				#DIV/0!				#DIV/0!				#DIV/0!				#DIV/0!				#DIV/0!								#DIV/0!				#DIV/0!
		0	0	#DIV/0!	0	0	#DIV/0!		0	0	#DIV/0!				#DIV/0!				#DIV/0!				#DIV/0!				#DIV/0!				#DIV/0!				#DIV/0!								#DIV/0!				#DIV/0!
		0	0	#DIV/0!	0	0	#DIV/0!		0	0	#DIV/0!				#DIV/0!				#DIV/0!				#DIV/0!				#DIV/0!				#DIV/0!				#DIV/0!								#DIV/0!				#DIV/0!
		0	0	#DIV/0!	0	0	#DIV/0!		0	0	#DIV/0!				#DIV/0!				#DIV/0!				#DIV/0!				#DIV/0!				#DIV/0!				#DIV/0!								#DIV/0!				#DIV/0!
		0	0	#DIV/0!	0	0	#DIV/0!		0	0	#DIV/0!				#DIV/0!				#DIV/0!				#DIV/0!				#DIV/0!				#DIV/0!				#DIV/0!								#DIV/0!				#DIV/0!
		0	0	#DIV/0!	0	0	#DIV/0!		0	0	#DIV/0!				#DIV/0!				#DIV/0!				#DIV/0!				#DIV/0!				#DIV/0!				#DIV/0!								#DIV/0!				#DIV/0!
		0	0	#DIV/0!	0	0	#DIV/0!		0	0	#DIV/0!				#DIV/0!				#DIV/0!				#DIV/0!				#DIV/0!				#DIV/0!				#DIV/0!								#DIV/0!				#DIV/0!
		0	0	#DIV/0!	0	0	#DIV/0!		0	0	#DIV/0!				#DIV/0!				#DIV/0!				#DIV/0!				#DIV/0!				#DIV/0!				#DIV/0!								#DIV/0!				#DIV/0!
		0	0	#DIV/0!	0	0	#DIV/0!		0	0	#DIV/0!				#DIV/0!				#DIV/0!				#DIV/0!				#DIV/0!				#DIV/0!				#DIV/0!								#DIV/0!				#DIV/0!
		0	0	#DIV/0!	0	0	#DIV/0!		0	0	#DIV/0!				#DIV/0!				#DIV/0!				#DIV/0!				#DIV/0!				#DIV/0!				#DIV/0!								#DIV/0!				#DIV/0!
		0	0	#DIV/0!	0	0	#DIV/0!		0	0	#DIV/0!				#DIV/0!				#DIV/0!				#DIV/0!				#DIV/0!				#DIV/0!				#DIV/0!								#DIV/0!				#DIV/0!
		0	0	#DIV/0!	0	0	#DIV/0!		0	0	#DIV/0!				#DIV/0!				#DIV/0!				#DIV/0!				#DIV/0!				#DIV/0!				#DIV/0!								#DIV/0!				#DIV/0!
		0	0	#DIV/0!	0	0	#DIV/0!		0	0	#DIV/0!				#DIV/0!				#DIV/0!				#DIV/0!				#DIV/0!				#DIV/0!				#DIV/0!								#DIV/0!				#DIV/0!
		0	0	#DIV/0!	0	0	#DIV/0!		0	0	#DIV/0!				#DIV/0!				#DIV/0!				#DIV/0!				#DIV/0!				#DIV/0!				#DIV/0!								#DIV/0!				#DIV/0!
		0	0	#DIV/0!	0	0	#DIV/0!		0	0	#DIV/0!				#DIV/0!				#DIV/0!				#DIV/0!				#DIV/0!				#DIV/0!				#DIV/0!								#DIV/0!				#DIV/0!
		0	0	#DIV/0!	0	0	#DIV/0!		0	0	#DIV/0!				#DIV/0!				#DIV/0!				#DIV/0!				#DIV/0!				#DIV/0!				#DIV/0!								#DIV/0!				#DIV/0!
		0	0	#DIV/0!	0	0	#DIV/0!		0	0	#DIV/0!				#DIV/0!				#DIV/0!				#DIV/0!				#DIV/0!				#DIV/0!				#DIV/0!								#DIV/0!				#DIV/0!
		0	0	#DIV/0!	0	0	#DIV/0!		0	0	#DIV/0!				#DIV/0!				#DIV/0!				#DIV/0!				#DIV/0!				#DIV/0!				#DIV/0!								#DIV/0!				#DIV/0!
		0	0	#DIV/0!	0	0	#DIV/0!		0	0	#DIV/0!				#DIV/0!				#DIV/0!				#DIV/0!				#DIV/0!				#DIV/0!				#DIV/0!								#DIV/0!				#DIV/0!
		0	0	#DIV/0!	0	0	#DIV/0!		0	0	#DIV/0!				#DIV/0!				#DIV/0!				#DIV/0!				#DIV/0!				#DIV/0!				#DIV/0!								#DIV/0!				#DIV/0!
		0	0	#DIV/0!	0	0	#DIV/0!		0	0	#DIV/0!				#DIV/0!				#DIV/0!				#DIV/0!				#DIV/0!				#DIV/0!				#DIV/0!								#DIV/0!				#DIV/0!
		0	0	#DIV/0!	0	0	#DIV/0!		0	0	#DIV/0!				#DIV/0!				#DIV/0!				#DIV/0!				#DIV/0!				#DIV/0!				#DIV/0!								#DIV/0!				#DIV/0!
		0	0	#DIV/0!	0	0	#DIV/0!		0	0	#DIV/0!				#DIV/0!				#DIV/0!				#DIV/0!				#DIV/0!				#DIV/0!				#DIV/0!								#DIV/0!				#DIV/0!
		0	0	#DIV/0!	0	0	#DIV/0!		0	0	#DIV/0!				#DIV/0!				#DIV/0!				#DIV/0!				#DIV/0!				#DIV/0!				#DIV/0!								#DIV/0!				#DIV/0!
		0	0	#DIV/0!	0	0	#DIV/0!		0	0	#DIV/0!				#DIV/0!				#DIV/0!				#DIV/0!				#DIV/0!				#DIV/0!				#DIV/0!								#DIV/0!				#DIV/0!
		0	0	#DIV/0!	0	0	#DIV/0!		0	0	#DIV/0!				#DIV/0!				#DIV/0!				#DIV/0!				#DIV/0!				#DIV/0!				#DIV/0!								#DIV/0!				#DIV/0!
		0	0	#DIV/0!	0	0	#DIV/0!		0	0	#DIV/0!				#DIV/0!				#DIV/0!				#DIV/0!				#DIV/0!				#DIV/0!				#DIV/0!								#DIV/0!				#DIV/0!
		0	0	#DIV/0!	0	0	#DIV/0!		0	0	#DIV/0!				#DIV/0!				#DIV/0!				#DIV/0!				#DIV/0!				#DIV/0!				#DIV/0!								#DIV/0!				#DIV/0!
		0	0	#DIV/0!	0	0	#DIV/0!		0	0	#DIV/0!				#DIV/0!				#DIV/0!				#DIV/0!				#DIV/0!				#DIV/0!				#DIV/0!								#DIV/0!				#DIV/0!
		0	0	#DIV/0!	0	0	#DIV/0!		0	0	#DIV/0!				#DIV/0!				#DIV/0!				#DIV/0!				#DIV/0!				#DIV/0!				#DIV/0!								#DIV/0!				#DIV/0!
		0	0	#DIV/0!	0	0	#DIV/0!		0	0	#DIV/0!				#DIV/0!				#DIV/0!				#DIV/0!				#DIV/0!				#DIV/0!				#DIV/0!								#DIV/0!				#DIV/0!
		0	0	#DIV/0!	0	0	#DIV/0!		0	0	#DIV/0!				#DIV/0!				#DIV/0!				#DIV/0!				#DIV/0!				#DIV/0!				#DIV/0!								#DIV/0!				#DIV/0!
		0	0	#DIV/0!	0	0	#DIV/0!		0	0	#DIV/0!				#DIV/0!				#DIV/0!				#DIV/0!				#DIV/0!				#DIV/0!				#DIV/0!								#DIV/0!				#DIV/0!
		0	0	#DIV/0!	0	0	#DIV/0!		0	0	#DIV/0!				#DIV/0!				#DIV/0!				#DIV/0!				#DIV/0!				#DIV/0!				#DIV/0!								#DIV/0!				#DIV/0!
		0	0	#DIV/0!	0	0	#DIV/0!		0	0	#DIV/0!				#DIV/0!				#DIV/0!				#DIV/0!				#DIV/0!				#DIV/0!				#DIV/0!								#DIV/0!				#DIV/0!
		0	0	#DIV/0!	0	0	#DIV/0!		0	0	#DIV/0!				#DIV/0!				#DIV/0!				#DIV/0!				#DIV/0!				#DIV/0!				#DIV/0!								#DIV/0!				#DIV/0!
		0	0	#DIV/0!	0	0	#DIV/0!		0	0	#DIV/0!				#DIV/0!				#DIV/0!				#DIV/0!				#DIV/0!				#DIV/0!				#DIV/0!								#DIV/0!				#DIV/0!
		0	0	#DIV/0!	0	0	#DIV/0!		0	0	#DIV/0!				#DIV/0!				#DIV/0!				#DIV/0!				#DIV/0!				#DIV/0!				#DIV/0!								#DIV/0!				#DIV/0!
		0	0	#DIV/0!	0	0	#DIV/0!		0	0	#DIV/0!				#DIV/0!				#DIV/0!				#DIV/0!				#DIV/0!				#DIV/0!				#DIV/0!								#DIV/0!				#DIV/0!
		0	0	#DIV/0!	0	0	#DIV/0!		0	0	#DIV/0!				#DIV/0!				#DIV/0!				#DIV/0!				#DIV/0!				#DIV/0!				#DIV/0!								#DIV/0!				#DIV/0!
		0	0	#DIV/0!	0	0	#DIV/0!		0	0	#DIV/0!				#DIV/0!				#DIV/0!				#DIV/0!				#DIV/0!				#DIV/0!				#DIV/0!								#DIV/0!				#DIV/0!
		0	0	#DIV/0!	0	0	#DIV/0!		0	0	#DIV/0!				#DIV/0!				#DIV/0!				#DIV/0!				#DIV/0!				#DIV/0!				#DIV/0!								#DIV/0!				#DIV/0!
		0	0	#DIV/0!	0	0	#DIV/0!		0	0	#DIV/0!				#DIV/0!				#DIV/0!				#DIV/0!				#DIV/0!				#DIV/0!				#DIV/0!								#DIV/0!				#DIV/0!
		0	0	#DIV/0!	0	0	#DIV/0!		0	0	#DIV/0!				#DIV/0!				#DIV/0!				#DIV/0!				#DIV/0!				#DIV/0!				#DIV/0!								#DIV/0!				#DIV/0!
		0	0	#DIV/0!	0	0	#DIV/0!		0	0	#DIV/0!				#DIV/0!				#DIV/0!				#DIV/0!				#DIV/0!				#DIV/0!				#DIV/0!								#DIV/0!				#DIV/0!
		0	0	#DIV/0!	0	0	#DIV/0!		0	0	#DIV/0!				#DIV/0!				#DIV/0!				#DIV/0!				#DIV/0!				#DIV/0!				#DIV/0!								#DIV/0!				#DIV/0!
		0	0	#DIV/0!	0	0	#DIV/0!		0	0	#DIV/0!				#DIV/0!				#DIV/0!				#DIV/0!				#DIV/0!				#DIV/0!				#DIV/0!								#DIV/0!				#DIV/0!
		0	0	#DIV/0!	0	0	#DIV/0!		0	0	#DIV/0!				#DIV/0!				#DIV/0!				#DIV/0!				#DIV/0!				#DIV/0!				#DIV/0!								#DIV/0!				#DIV/0!
		0	0	#DIV/0!	0	0	#DIV/0!		0	0	#DIV/0!				#DIV/0!				#DIV/0!				#DIV/0!				#DIV/0!				#DIV/0!				#DIV/0!								#DIV/0!				#DIV/0!
		0	0	#DIV/0!	0	0	#DIV/0!		0	0	#DIV/0!				#DIV/0!				#DIV/0!				#DIV/0!				#DIV/0!				#DIV/0!				#DIV/0!								#DIV/0!				#DIV/0!
		0	0	#DIV/0!	0	0	#DIV/0!		0	0	#DIV/0!				#DIV/0!				#DIV/0!				#DIV/0!				#DIV/0!				#DIV/0!				#DIV/0!								#DIV/0!				#DIV/0!
		0	0	#DIV/0!	0	0	#DIV/0!		0	0	#DIV/0!				#DIV/0!				#DIV/0!				#DIV/0!				#DIV/0!				#DIV/0!				#DIV/0!								#DIV/0!				#DIV/0!
		0	0	#DIV/0!	0	0	#DIV/0!		0	0	#DIV/0!				#DIV/0!				#DIV/0!				#DIV/0!				#DIV/0!				#DIV/0!				#DIV/0!								#DIV/0!				#DIV/0!
		0	0	#DIV/0!	0	0	#DIV/0!		0	0	#DIV/0!				#DIV/0!				#DIV/0!				#DIV/0!				#DIV/0!				#DIV/0!				#DIV/0!								#DIV/0!				#DIV/0!
		0	0	#DIV/0!	0	0	#DIV/0!		0	0	#DIV/0!				#DIV/0!				#DIV/0!				#DIV/0!				#DIV/0!				#DIV/0!				#DIV/0!								#DIV/0!				#DIV/0!
		0	0	#DIV/0!	0	0	#DIV/0!		0	0	#DIV/0!				#DIV/0!				#DIV/0!				#DIV/0!				#DIV/0!				#DIV/0!				#DIV/0!								#DIV/0!				#DIV/0!
		0	0	#DIV/0!	0	0	#DIV/0!		0	0	#DIV/0!				#DIV/0!				#DIV/0!				#DIV/0!				#DIV/0!				#DIV/0!				#DIV/0!								#DIV/0!				#DIV/0!
		0	0	#DIV/0!	0	0	#DIV/0!		0	0	#DIV/0!				#DIV/0!				#DIV/0!				#DIV/0!				#DIV/0!				#DIV/0!				#DIV/0!								#DIV/0!				#DIV/0!
		0	0	#DIV/0!	0	0	#DIV/0!		0	0	#DIV/0!				#DIV/0!				#DIV/0!				#DIV/0!				#DIV/0!				#DIV/0!				#DIV/0!								#DIV/0!				#DIV/0!
		0	0	#DIV/0!	0	0	#DIV/0!		0	0	#DIV/0!				#DIV/0!				#DIV/0!				#DIV/0!				#DIV/0!				#DIV/0!				#DIV/0!								#DIV/0!				#DIV/0!
		0	0	#DIV/0!	0	0	#DIV/0!		0	0	#DIV/0!				#DIV/0!				#DIV/0!				#DIV/0!				#DIV/0!				#DIV/0!				#DIV/0!								#DIV/0!				#DIV/0!
		0	0	#DIV/0!	0	0	#DIV/0!		0	0	#DIV/0!				#DIV/0!				#DIV/0!				#DIV/0!				#DIV/0!				#DIV/0!				#DIV/0!								#DIV/0!				#DIV/0!
		0	0	#DIV/0!	0	0	#DIV/0!		0	0	#DIV/0!				#DIV/0!				#DIV/0!				#DIV/0!				#DIV/0!				#DIV/0!				#DIV/0!								#DIV/0!				#DIV/0!
		0	0	#DIV/0!	0	0	#DIV/0!		0	0	#DIV/0!				#DIV/0!				#DIV/0!				#DIV/0!				#DIV/0!				#DIV/0!				#DIV/0!								#DIV/0!				#DIV/0!
		0	0	#DIV/0!	0	0	#DIV/0!		0	0	#DIV/0!				#DIV/0!				#DIV/0!				#DIV/0!				#DIV/0!				#DIV/0!				#DIV/0!								#DIV/0!				#DIV/0!
		0	0	#DIV/0!	0	0	#DIV/0!		0	0	#DIV/0!				#DIV/0!				#DIV/0!				#DIV/0!				#DIV/0!				#DIV/0!				#DIV/0!								#DIV/0!				#DIV/0!
		0	0	#DIV/0!	0	0	#DIV/0!		0	0	#DIV/0!				#DIV/0!				#DIV/0!				#DIV/0!				#DIV/0!				#DIV/0!				#DIV/0!								#DIV/0!				#DIV/0!
		0	0	#DIV/0!	0	0	#DIV/0!		0	0	#DIV/0!				#DIV/0!				#DIV/0!				#DIV/0!				#DIV/0!				#DIV/0!				#DIV/0!								#DIV/0!				#DIV/0!
		0	0	#DIV/0!	0	0	#DIV/0!		0	0	#DIV/0!				#DIV/0!				#DIV/0!				#DIV/0!				#DIV/0!				#DIV/0!				#DIV/0!								#DIV/0!				#DIV/0!
		0	0	#DIV/0!	0	0	#DIV/0!		0	0	#DIV/0!				#DIV/0!				#DIV/0!				#DIV/0!				#DIV/0!				#DIV/0!				#DIV/0!								#DIV/0!				#DIV/0!
		0	0	#DIV/0!	0	0	#DIV/0!		0	0	#DIV/0!				#DIV/0!				#DIV/0!				#DIV/0!				#DIV/0!				#DIV/0!				#DIV/0!								#DIV/0!				#DIV/0!
		0	0	#DIV/0!	0	0	#DIV/0!		0	0	#DIV/0!				#DIV/0!				#DIV/0!				#DIV/0!				#DIV/0!				#DIV/0!				#DIV/0!								#DIV/0!				#DIV/0!
		0	0	#DIV/0!	0	0	#DIV/0!		0	0	#DIV/0!				#DIV/0!				#DIV/0!				#DIV/0!				#DIV/0!				#DIV/0!				#DIV/0!								#DIV/0!				#DIV/0!
		0	0	#DIV/0!	0	0	#DIV/0!		0	0	#DIV/0!				#DIV/0!				#DIV/0!				#DIV/0!				#DIV/0!				#DIV/0!				#DIV/0!								#DIV/0!				#DIV/0!
		0	0	#DIV/0!	0	0	#DIV/0!		0	0	#DIV/0!				#DIV/0!				#DIV/0!				#DIV/0!				#DIV/0!				#DIV/0!				#DIV/0!								#DIV/0!				#DIV/0!
		0	0	#DIV/0!	0	0	#DIV/0!		0	0	#DIV/0!				#DIV/0!				#DIV/0!				#DIV/0!				#DIV/0!				#DIV/0!				#DIV/0!								#DIV/0!				#DIV/0!
		0	0	#DIV/0!	0	0	#DIV/0!		0	0	#DIV/0!				#DIV/0!				#DIV/0!				#DIV/0!				#DIV/0!				#DIV/0!				#DIV/0!								#DIV/0!				#DIV/0!
		0	0	#DIV/0!	0	0	#DIV/0!		0	0	#DIV/0!				#DIV/0!				#DIV/0!				#DIV/0!				#DIV/0!				#DIV/0!				#DIV/0!								#DIV/0!				#DIV/0!
		0	0	#DIV/0!	0	0	#DIV/0!		0	0	#DIV/0!				#DIV/0!				#DIV/0!				#DIV/0!				#DIV/0!				#DIV/0!				#DIV/0!								#DIV/0!				#DIV/0!
		0	0	#DIV/0!	0	0	#DIV/0!		0	0	#DIV/0!				#DIV/0!				#DIV/0!				#DIV/0!				#DIV/0!				#DIV/0!				#DIV/0!								#DIV/0!				#DIV/0!
		0	0	#DIV/0!	0	0	#DIV/0!		0	0	#DIV/0!				#DIV/0!				#DIV/0!				#DIV/0!				#DIV/0!				#DIV/0!				#DIV/0!								#DIV/0!				#DIV/0!
		0	0	#DIV/0!	0	0	#DIV/0!		0	0	#DIV/0!				#DIV/0!				#DIV/0!				#DIV/0!				#DIV/0!				#DIV/0!				#DIV/0!								#DIV/0!				#DIV/0!
		0	0	#DIV/0!	0	0	#DIV/0!		0	0	#DIV/0!				#DIV/0!				#DIV/0!				#DIV/0!				#DIV/0!				#DIV/0!				#DIV/0!								#DIV/0!				#DIV/0!
		0	0	#DIV/0!	0	0	#DIV/0!		0	0	#DIV/0!				#DIV/0!				#DIV/0!				#DIV/0!				#DIV/0!				#DIV/0!				#DIV/0!								#DIV/0!				#DIV/0!
		0	0	#DIV/0!	0	0	#DIV/0!		0	0	#DIV/0!				#DIV/0!				#DIV/0!				#DIV/0!				#DIV/0!				#DIV/0!				#DIV/0!								#DIV/0!				#DIV/0!
		0	0	#DIV/0!	0	0	#DIV/0!		0	0	#DIV/0!				#DIV/0!				#DIV/0!				#DIV/0!				#DIV/0!				#DIV/0!				#DIV/0!								#DIV/0!				#DIV/0!
		0	0	#DIV/0!	0	0	#DIV/0!		0	0	#DIV/0!				#DIV/0!				#DIV/0!				#DIV/0!				#DIV/0!				#DIV/0!				#DIV/0!								#DIV/0!				#DIV/0!
		0	0	#DIV/0!	0	0	#DIV/0!		0	0	#DIV/0!				#DIV/0!				#DIV/0!				#DIV/0!				#DIV/0!				#DIV/0!				#DIV/0!								#DIV/0!				#DIV/0!
		0	0	#DIV/0!	0	0	#DIV/0!		0	0	#DIV/0!				#DIV/0!				#DIV/0!				#DIV/0!				#DIV/0!				#DIV/0!				#DIV/0!								#DIV/0!				#DIV/0!
		0	0	#DIV/0!	0	0	#DIV/0!		0	0	#DIV/0!				#DIV/0!				#DIV/0!				#DIV/0!				#DIV/0!				#DIV/0!				#DIV/0!								#DIV/0!				#DIV/0!
		0	0	#DIV/0!	0	0	#DIV/0!		0	0	#DIV/0!				#DIV/0!				#DIV/0!				#DIV/0!				#DIV/0!				#DIV/0!				#DIV/0!								#DIV/0!				#DIV/0!
		0	0	#DIV/0!	0	0	#DIV/0!		0	0	#DIV/0!				#DIV/0!				#DIV/0!				#DIV/0!				#DIV/0!				#DIV/0!				#DIV/0!								#DIV/0!				#DIV/0!
		0	0	#DIV/0!	0	0	#DIV/0!		0	0	#DIV/0!				#DIV/0!				#DIV/0!				#DIV/0!				#DIV/0!				#DIV/0!				#DIV/0!								#DIV/0!				#DIV/0!
		0	0	#DIV/0!	0	0	#DIV/0!		0	0	#DIV/0!				#DIV/0!				#DIV/0!				#DIV/0!				#DIV/0!				#DIV/0!				#DIV/0!								#DIV/0!				#DIV/0!
		0	0	#DIV/0!	0	0	#DIV/0!		0	0	#DIV/0!				#DIV/0!				#DIV/0!				#DIV/0!				#DIV/0!				#DIV/0!				#DIV/0!								#DIV/0!				#DIV/0!
		0	0	#DIV/0!	0	0	#DIV/0!		0	0	#DIV/0!				#DIV/0!				#DIV/0!				#DIV/0!				#DIV/0!				#DIV/0!				#DIV/0!								#DIV/0!				#DIV/0!
		0	0	#DIV/0!	0	0	#DIV/0!		0	0	#DIV/0!				#DIV/0!				#DIV/0!				#DIV/0!				#DIV/0!				#DIV/0!				#DIV/0!								#DIV/0!				#DIV/0!
		0	0	#DIV/0!	0	0	#DIV/0!		0	0	#DIV/0!				#DIV/0!				#DIV/0!				#DIV/0!				#DIV/0!				#DIV/0!				#DIV/0!								#DIV/0!				#DIV/0!
		0	0	#DIV/0!	0	0	#DIV/0!		0	0	#DIV/0!				#DIV/0!				#DIV/0!				#DIV/0!				#DIV/0!				#DIV/0!				#DIV/0!								#DIV/0!				#DIV/0!
		0	0	#DIV/0!	0	0	#DIV/0!		0	0	#DIV/0!				#DIV/0!				#DIV/0!				#DIV/0!				#DIV/0!				#DIV/0!				#DIV/0!								#DIV/0!				#DIV/0!
		0	0	#DIV/0!	0	0	#DIV/0!		0	0	#DIV/0!				#DIV/0!				#DIV/0!				#DIV/0!				#DIV/0!				#DIV/0!				#DIV/0!								#DIV/0!				#DIV/0!
		0	0	#DIV/0!	0	0	#DIV/0!		0	0	#DIV/0!				#DIV/0!				#DIV/0!				#DIV/0!				#DIV/0!				#DIV/0!				#DIV/0!								#DIV/0!				#DIV/0!
		0	0	#DIV/0!	0	0	#DIV/0!		0	0	#DIV/0!				#DIV/0!				#DIV/0!				#DIV/0!				#DIV/0!				#DIV/0!				#DIV/0!								#DIV/0!				#DIV/0!
		0	0	#DIV/0!	0	0	#DIV/0!		0	0	#DIV/0!				#DIV/0!				#DIV/0!				#DIV/0!				#DIV/0!				#DIV/0!				#DIV/0!								#DIV/0!				#DIV/0!
		0	0	#DIV/0!	0	0	#DIV/0!		0	0	#DIV/0!				#DIV/0!				#DIV/0!				#DIV/0!				#DIV/0!				#DIV/0!				#DIV/0!								#DIV/0!				#DIV/0!
		0	0	#DIV/0!	0	0	#DIV/0!		0	0	#DIV/0!				#DIV/0!				#DIV/0!				#DIV/0!				#DIV/0!				#DIV/0!				#DIV/0!								#DIV/0!				#DIV/0!
		0	0	#DIV/0!	0	0	#DIV/0!		0	0	#DIV/0!				#DIV/0!				#DIV/0!				#DIV/0!				#DIV/0!				#DIV/0!				#DIV/0!								#DIV/0!				#DIV/0!
		0	0	#DIV/0!	0	0	#DIV/0!		0	0	#DIV/0!				#DIV/0!				#DIV/0!				#DIV/0!				#DIV/0!				#DIV/0!				#DIV/0!								#DIV/0!				#DIV/0!
		0	0	#DIV/0!	0	0	#DIV/0!		0	0	#DIV/0!				#DIV/0!				#DIV/0!				#DIV/0!				#DIV/0!				#DIV/0!				#DIV/0!								#DIV/0!				#DIV/0!
		0	0	#DIV/0!	0	0	#DIV/0!		0	0	#DIV/0!				#DIV/0!				#DIV/0!				#DIV/0!				#DIV/0!				#DIV/0!				#DIV/0!								#DIV/0!				#DIV/0!
		0	0	#DIV/0!	0	0	#DIV/0!		0	0	#DIV/0!				#DIV/0!				#DIV/0!				#DIV/0!				#DIV/0!				#DIV/0!				#DIV/0!								#DIV/0!				#DIV/0!
		0	0	#DIV/0!	0	0	#DIV/0!		0	0	#DIV/0!				#DIV/0!				#DIV/0!				#DIV/0!				#DIV/0!				#DIV/0!				#DIV/0!								#DIV/0!				#DIV/0!
		0	0	#DIV/0!	0	0	#DIV/0!		0	0	#DIV/0!				#DIV/0!				#DIV/0!				#DIV/0!				#DIV/0!				#DIV/0!				#DIV/0!								#DIV/0!				#DIV/0!
		0	0	#DIV/0!	0	0	#DIV/0!		0	0	#DIV/0!				#DIV/0!				#DIV/0!				#DIV/0!				#DIV/0!				#DIV/0!				#DIV/0!								#DIV/0!				#DIV/0!
		0	0	#DIV/0!	0	0	#DIV/0!		0	0	#DIV/0!				#DIV/0!				#DIV/0!				#DIV/0!				#DIV/0!				#DIV/0!				#DIV/0!								#DIV/0!				#DIV/0!
		0	0	#DIV/0!	0	0	#DIV/0!		0	0	#DIV/0!				#DIV/0!				#DIV/0!				#DIV/0!				#DIV/0!				#DIV/0!				#DIV/0!								#DIV/0!				#DIV/0!
		0	0	#DIV/0!	0	0	#DIV/0!		0	0	#DIV/0!				#DIV/0!				#DIV/0!				#DIV/0!				#DIV/0!				#DIV/0!				#DIV/0!								#DIV/0!				#DIV/0!
		0	0	#DIV/0!	0	0	#DIV/0!		0	0	#DIV/0!				#DIV/0!				#DIV/0!				#DIV/0!				#DIV/0!				#DIV/0!				#DIV/0!								#DIV/0!				#DIV/0!
		0	0	#DIV/0!	0	0	#DIV/0!		0	0	#DIV/0!				#DIV/0!				#DIV/0!				#DIV/0!				#DIV/0!				#DIV/0!				#DIV/0!								#DIV/0!				#DIV/0!
		0	0	#DIV/0!	0	0	#DIV/0!		0	0	#DIV/0!				#DIV/0!				#DIV/0!				#DIV/0!				#DIV/0!				#DIV/0!				#DIV/0!								#DIV/0!				#DIV/0!
		0	0	#DIV/0!	0	0	#DIV/0!		0	0	#DIV/0!				#DIV/0!				#DIV/0!				#DIV/0!				#DIV/0!				#DIV/0!				#DIV/0!								#DIV/0!				#DIV/0!
		0	0	#DIV/0!	0	0	#DIV/0!		0	0	#DIV/0!				#DIV/0!				#DIV/0!				#DIV/0!				#DIV/0!				#DIV/0!				#DIV/0!								#DIV/0!				#DIV/0!
		0	0	#DIV/0!	0	0	#DIV/0!		0	0	#DIV/0!				#DIV/0!				#DIV/0!				#DIV/0!				#DIV/0!				#DIV/0!				#DIV/0!								#DIV/0!				#DIV/0!
		0	0	#DIV/0!	0	0	#DIV/0!		0	0	#DIV/0!				#DIV/0!				#DIV/0!				#DIV/0!				#DIV/0!				#DIV/0!				#DIV/0!								#DIV/0!				#DIV/0!
		0	0	#DIV/0!	0	0	#DIV/0!		0	0	#DIV/0!				#DIV/0!				#DIV/0!				#DIV/0!				#DIV/0!				#DIV/0!				#DIV/0!								#DIV/0!				#DIV/0!
		0	0	#DIV/0!	0	0	#DIV/0!		0	0	#DIV/0!				#DIV/0!				#DIV/0!				#DIV/0!				#DIV/0!				#DIV/0!				#DIV/0!								#DIV/0!				#DIV/0!
		0	0	#DIV/0!	0	0	#DIV/0!		0	0	#DIV/0!				#DIV/0!				#DIV/0!				#DIV/0!				#DIV/0!				#DIV/0!				#DIV/0!								#DIV/0!				#DIV/0!
		0	0	#DIV/0!	0	0	#DIV/0!		0	0	#DIV/0!				#DIV/0!				#DIV/0!				#DIV/0!				#DIV/0!				#DIV/0!				#DIV/0!								#DIV/0!				#DIV/0!
		0	0	#DIV/0!	0	0	#DIV/0!		0	0	#DIV/0!				#DIV/0!				#DIV/0!				#DIV/0!				#DIV/0!				#DIV/0!				#DIV/0!								#DIV/0!				#DIV/0!
		0	0	#DIV/0!	0	0	#DIV/0!		0	0	#DIV/0!				#DIV/0!				#DIV/0!				#DIV/0!				#DIV/0!				#DIV/0!				#DIV/0!								#DIV/0!				#DIV/0!
		0	0	#DIV/0!	0	0	#DIV/0!		0	0	#DIV/0!				#DIV/0!				#DIV/0!				#DIV/0!				#DIV/0!				#DIV/0!				#DIV/0!								#DIV/0!				#DIV/0!
		0	0	#DIV/0!	0	0	#DIV/0!		0	0	#DIV/0!				#DIV/0!				#DIV/0!				#DIV/0!				#DIV/0!				#DIV/0!				#DIV/0!								#DIV/0!				#DIV/0!
		0	0	#DIV/0!	0	0	#DIV/0!		0	0	#DIV/0!				#DIV/0!				#DIV/0!				#DIV/0!				#DIV/0!				#DIV/0!				#DIV/0!								#DIV/0!				#DIV/0!
		0	0	#DIV/0!	0	0	#DIV/0!		0	0	#DIV/0!				#DIV/0!				#DIV/0!				#DIV/0!				#DIV/0!				#DIV/0!				#DIV/0!								#DIV/0!				#DIV/0!
		0	0	#DIV/0!	0	0	#DIV/0!		0	0	#DIV/0!				#DIV/0!				#DIV/0!				#DIV/0!				#DIV/0!				#DIV/0!				#DIV/0!								#DIV/0!				#DIV/0!
[truncated: 115 more columns]

## Sheet: 3-conj, uvea
Tumours of the conjuntiva and uvea
TABLE 3 - Prevalence of TERT promoter mutations		Prev(n)	Total(n)	Total(%)	p1	t1	%	ref1	p2	t2	%	ref2	p3	t3	%	ref3	p4	t4	%	ref4	p5	t5	%	ref5	p6	t6	%	ref6	p7	t7	%	ref7	p8	t8	%	ref8	p9	t9	%	ref9	p10	t10	%	ref10	p11	t11	%	ref11	p12
Conjunctival tumours	Primary acquired melanosis with atypia	2	25	0.08	2	25	0.08	Koopmans2014															#DIV/0!				#DIV/0!				#DIV/0!				#DIV/0!				#DIV/0!				#DIV/0!				#DIV/0!
Conjunctival tumours	Conjunctival melanoma	32	84	0.380952	12	38	0.315789	Griewank2013	4	7	0.571429	Griewank2014	16	39	0.410256	Koopmans2014							#DIV/0!				#DIV/0!				#DIV/0!				#DIV/0!				#DIV/0!				#DIV/0!				#DIV/0!
Conjunctival tumours	Perilimbal squamous cell carcinoma	21	48	0.4375	21	48	0.4375	Scholz2015															#DIV/0!				#DIV/0!				#DIV/0!				#DIV/0!				#DIV/0!				#DIV/0!				#DIV/0!
Conjunctival tumours	Primary acquired melanosis without atypia	0	13	0	0	13	0	Koopmans2014
Conjunctival tumours	Conjunctival naevi	0	56	0	0	56	0	Koopmans2014
Uveal tumours	Uveal melanoma	2	202	0.00990099	0	47	0	Griewank2013	0	3	0	Griewank2014	1	102	0.00980392	Koopmans2014	1	50	0.02	Dono2014
			428
TABLE 4A - Prevalence of TERT amplifications																					p5	t5	%	ref5	p6	t6	%	ref6	p7	t7	%	ref7	p8	t8	%	ref8	p9	t9	%	ref9	p10	t10	%	ref10	p11	t11	%	ref11	p12
Absence of studies.
TABLE 4B - Prevalence of TERC amplifications																					p5	t5	%	ref5	p6	t6	%	ref6	p7	t7	%	ref7	p8	t8	%	ref8	p9	t9	%	ref9	p10	t10	%	ref10	p11	t11	%	ref11	p12
Absence of studies.
TABLE 6 - Prevalence of ALT																					p5	t5	%	ref5	p6	t6	%	ref6	p7	t7	%	ref7	p8	t8	%	ref8	p9	t9	%	ref9	p10	t10	%	ref10	p11	t11	%	ref11	p12
Absence of studies.
NOS non otherwise specified
		0	0	#DIV/0!	0	0	#DIV/0!		0	0	#DIV/0!				#DIV/0!				#DIV/0!				#DIV/0!				#DIV/0!				#DIV/0!				#DIV/0!				#DIV/0!				#DIV/0!				#DIV/0!
		0	0	#DIV/0!	0	0	#DIV/0!		0	0	#DIV/0!				#DIV/0!				#DIV/0!				#DIV/0!				#DIV/0!				#DIV/0!				#DIV/0!				#DIV/0!				#DIV/0!				#DIV/0!
		0	0	#DIV/0!	0	0	#DIV/0!		0	0	#DIV/0!				#DIV/0!				#DIV/0!				#DIV/0!				#DIV/0!				#DIV/0!				#DIV/0!				#DIV/0!				#DIV/0!				#DIV/0!
		0	0	#DIV/0!	0	0	#DIV/0!		0	0	#DIV/0!				#DIV/0!				#DIV/0!				#DIV/0!				#DIV/0!				#DIV/0!				#DIV/0!				#DIV/0!				#DIV/0!				#DIV/0!
		0	0	#DIV/0!	0	0	#DIV/0!		0	0	#DIV/0!				#DIV/0!				#DIV/0!				#DIV/0!				#DIV/0!				#DIV/0!				#DIV/0!				#DIV/0!				#DIV/0!				#DIV/0!
		0	0	#DIV/0!	0	0	#DIV/0!		0	0	#DIV/0!				#DIV/0!				#DIV/0!				#DIV/0!				#DIV/0!				#DIV/0!				#DIV/0!				#DIV/0!				#DIV/0!				#DIV/0!
		0	0	#DIV/0!	0	0	#DIV/0!		0	0	#DIV/0!				#DIV/0!				#DIV/0!				#DIV/0!				#DIV/0!				#DIV/0!				#DIV/0!				#DIV/0!				#DIV/0!				#DIV/0!
		0	0	#DIV/0!	0	0	#DIV/0!		0	0	#DIV/0!				#DIV/0!				#DIV/0!				#DIV/0!				#DIV/0!				#DIV/0!				#DIV/0!				#DIV/0!				#DIV/0!				#DIV/0!
		0	0	#DIV/0!	0	0	#DIV/0!		0	0	#DIV/0!				#DIV/0!				#DIV/0!				#DIV/0!				#DIV/0!				#DIV/0!				#DIV/0!				#DIV/0!				#DIV/0!				#DIV/0!
		0	0	#DIV/0!	0	0	#DIV/0!		0	0	#DIV/0!				#DIV/0!				#DIV/0!				#DIV/0!				#DIV/0!				#DIV/0!				#DIV/0!				#DIV/0!				#DIV/0!				#DIV/0!
		0	0	#DIV/0!	0	0	#DIV/0!		0	0	#DIV/0!				#DIV/0!				#DIV/0!				#DIV/0!				#DIV/0!				#DIV/0!				#DIV/0!				#DIV/0!				#DIV/0!				#DIV/0!
		0	0	#DIV/0!	0	0	#DIV/0!		0	0	#DIV/0!				#DIV/0!				#DIV/0!				#DIV/0!				#DIV/0!				#DIV/0!				#DIV/0!				#DIV/0!				#DIV/0!				#DIV/0!
		0	0	#DIV/0!	0	0	#DIV/0!		0	0	#DIV/0!				#DIV/0!				#DIV/0!				#DIV/0!				#DIV/0!				#DIV/0!				#DIV/0!				#DIV/0!				#DIV/0!				#DIV/0!
		0	0	#DIV/0!	0	0	#DIV/0!		0	0	#DIV/0!				#DIV/0!				#DIV/0!				#DIV/0!				#DIV/0!				#DIV/0!				#DIV/0!				#DIV/0!				#DIV/0!				#DIV/0!
		0	0	#DIV/0!	0	0	#DIV/0!		0	0	#DIV/0!				#DIV/0!				#DIV/0!				#DIV/0!				#DIV/0!				#DIV/0!				#DIV/0!				#DIV/0!				#DIV/0!				#DIV/0!
		0	0	#DIV/0!	0	0	#DIV/0!		0	0	#DIV/0!				#DIV/0!				#DIV/0!				#DIV/0!				#DIV/0!				#DIV/0!				#DIV/0!				#DIV/0!				#DIV/0!				#DIV/0!
		0	0	#DIV/0!	0	0	#DIV/0!		0	0	#DIV/0!				#DIV/0!				#DIV/0!				#DIV/0!				#DIV/0!				#DIV/0!				#DIV/0!				#DIV/0!				#DIV/0!				#DIV/0!
		0	0	#DIV/0!	0	0	#DIV/0!		0	0	#DIV/0!				#DIV/0!				#DIV/0!				#DIV/0!				#DIV/0!				#DIV/0!				#DIV/0!				#DIV/0!				#DIV/0!				#DIV/0!
		0	0	#DIV/0!	0	0	#DIV/0!		0	0	#DIV/0!				#DIV/0!				#DIV/0!				#DIV/0!				#DIV/0!				#DIV/0!				#DIV/0!				#DIV/0!				#DIV/0!				#DIV/0!
		0	0	#DIV/0!	0	0	#DIV/0!		0	0	#DIV/0!				#DIV/0!				#DIV/0!				#DIV/0!				#DIV/0!				#DIV/0!				#DIV/0!				#DIV/0!				#DIV/0!				#DIV/0!
		0	0	#DIV/0!	0	0	#DIV/0!		0	0	#DIV/0!				#DIV/0!				#DIV/0!				#DIV/0!				#DIV/0!				#DIV/0!				#DIV/0!				#DIV/0!				#DIV/0!				#DIV/0!
		0	0	#DIV/0!	0	0	#DIV/0!		0	0	#DIV/0!				#DIV/0!				#DIV/0!				#DIV/0!				#DIV/0!				#DIV/0!				#DIV/0!				#DIV/0!				#DIV/0!				#DIV/0!
		0	0	#DIV/0!	0	0	#DIV/0!		0	0	#DIV/0!				#DIV/0!				#DIV/0!				#DIV/0!				#DIV/0!				#DIV/0!				#DIV/0!				#DIV/0!				#DIV/0!				#DIV/0!
		0	0	#DIV/0!	0	0	#DIV/0!		0	0	#DIV/0!				#DIV/0!				#DIV/0!				#DIV/0!				#DIV/0!				#DIV/0!				#DIV/0!				#DIV/0!				#DIV/0!				#DIV/0!
		0	0	#DIV/0!	0	0	#DIV/0!		0	0	#DIV/0!				#DIV/0!				#DIV/0!				#DIV/0!				#DIV/0!				#DIV/0!				#DIV/0!				#DIV/0!				#DIV/0!				#DIV/0!
		0	0	#DIV/0!	0	0	#DIV/0!		0	0	#DIV/0!				#DIV/0!				#DIV/0!				#DIV/0!				#DIV/0!				#DIV/0!				#DIV/0!				#DIV/0!				#DIV/0!				#DIV/0!
		0	0	#DIV/0!	0	0	#DIV/0!		0	0	#DIV/0!				#DIV/0!				#DIV/0!				#DIV/0!				#DIV/0!				#DIV/0!				#DIV/0!				#DIV/0!				#DIV/0!				#DIV/0!
		0	0	#DIV/0!	0	0	#DIV/0!		0	0	#DIV/0!				#DIV/0!				#DIV/0!				#DIV/0!				#DIV/0!				#DIV/0!				#DIV/0!				#DIV/0!				#DIV/0!				#DIV/0!
		0	0	#DIV/0!	0	0	#DIV/0!		0	0	#DIV/0!				#DIV/0!				#DIV/0!				#DIV/0!				#DIV/0!				#DIV/0!				#DIV/0!				#DIV/0!				#DIV/0!				#DIV/0!
		0	0	#DIV/0!	0	0	#DIV/0!		0	0	#DIV/0!				#DIV/0!				#DIV/0!				#DIV/0!				#DIV/0!				#DIV/0!				#DIV/0!				#DIV/0!				#DIV/0!				#DIV/0!
		0	0	#DIV/0!	0	0	#DIV/0!		0	0	#DIV/0!				#DIV/0!				#DIV/0!				#DIV/0!				#DIV/0!				#DIV/0!				#DIV/0!				#DIV/0!				#DIV/0!				#DIV/0!
		0	0	#DIV/0!	0	0	#DIV/0!		0	0	#DIV/0!				#DIV/0!				#DIV/0!				#DIV/0!				#DIV/0!				#DIV/0!				#DIV/0!				#DIV/0!				#DIV/0!				#DIV/0!
		0	0	#DIV/0!	0	0	#DIV/0!		0	0	#DIV/0!				#DIV/0!				#DIV/0!				#DIV/0!				#DIV/0!				#DIV/0!				#DIV/0!				#DIV/0!				#DIV/0!				#DIV/0!
		0	0	#DIV/0!	0	0	#DIV/0!		0	0	#DIV/0!				#DIV/0!				#DIV/0!				#DIV/0!				#DIV/0!				#DIV/0!				#DIV/0!				#DIV/0!				#DIV/0!				#DIV/0!
		0	0	#DIV/0!	0	0	#DIV/0!		0	0	#DIV/0!				#DIV/0!				#DIV/0!				#DIV/0!				#DIV/0!				#DIV/0!				#DIV/0!				#DIV/0!				#DIV/0!				#DIV/0!
		0	0	#DIV/0!	0	0	#DIV/0!		0	0	#DIV/0!				#DIV/0!				#DIV/0!				#DIV/0!				#DIV/0!				#DIV/0!				#DIV/0!				#DIV/0!				#DIV/0!				#DIV/0!
		0	0	#DIV/0!	0	0	#DIV/0!		0	0	#DIV/0!				#DIV/0!				#DIV/0!				#DIV/0!				#DIV/0!				#DIV/0!				#DIV/0!				#DIV/0!				#DIV/0!				#DIV/0!
		0	0	#DIV/0!	0	0	#DIV/0!		0	0	#DIV/0!				#DIV/0!				#DIV/0!				#DIV/0!				#DIV/0!				#DIV/0!				#DIV/0!				#DIV/0!				#DIV/0!				#DIV/0!
		0	0	#DIV/0!	0	0	#DIV/0!		0	0	#DIV/0!				#DIV/0!				#DIV/0!				#DIV/0!				#DIV/0!				#DIV/0!				#DIV/0!				#DIV/0!				#DIV/0!				#DIV/0!
		0	0	#DIV/0!	0	0	#DIV/0!		0	0	#DIV/0!				#DIV/0!				#DIV/0!				#DIV/0!				#DIV/0!				#DIV/0!				#DIV/0!				#DIV/0!				#DIV/0!				#DIV/0!
		0	0	#DIV/0!	0	0	#DIV/0!		0	0	#DIV/0!				#DIV/0!				#DIV/0!				#DIV/0!				#DIV/0!				#DIV/0!				#DIV/0!				#DIV/0!				#DIV/0!				#DIV/0!
		0	0	#DIV/0!	0	0	#DIV/0!		0	0	#DIV/0!				#DIV/0!				#DIV/0!				#DIV/0!				#DIV/0!				#DIV/0!				#DIV/0!				#DIV/0!				#DIV/0!				#DIV/0!
		0	0	#DIV/0!	0	0	#DIV/0!		0	0	#DIV/0!				#DIV/0!				#DIV/0!				#DIV/0!				#DIV/0!				#DIV/0!				#DIV/0!				#DIV/0!				#DIV/0!				#DIV/0!
		0	0	#DIV/0!	0	0	#DIV/0!		0	0	#DIV/0!				#DIV/0!				#DIV/0!				#DIV/0!				#DIV/0!				#DIV/0!				#DIV/0!				#DIV/0!				#DIV/0!				#DIV/0!
		0	0	#DIV/0!	0	0	#DIV/0!		0	0	#DIV/0!				#DIV/0!				#DIV/0!				#DIV/0!				#DIV/0!				#DIV/0!				#DIV/0!				#DIV/0!				#DIV/0!				#DIV/0!
		0	0	#DIV/0!	0	0	#DIV/0!		0	0	#DIV/0!				#DIV/0!				#DIV/0!				#DIV/0!				#DIV/0!				#DIV/0!				#DIV/0!				#DIV/0!				#DIV/0!				#DIV/0!
		0	0	#DIV/0!	0	0	#DIV/0!		0	0	#DIV/0!				#DIV/0!				#DIV/0!				#DIV/0!				#DIV/0!				#DIV/0!				#DIV/0!				#DIV/0!				#DIV/0!				#DIV/0!
		0	0	#DIV/0!	0	0	#DIV/0!		0	0	#DIV/0!				#DIV/0!				#DIV/0!				#DIV/0!				#DIV/0!				#DIV/0!				#DIV/0!				#DIV/0!				#DIV/0!				#DIV/0!
		0	0	#DIV/0!	0	0	#DIV/0!		0	0	#DIV/0!				#DIV/0!				#DIV/0!				#DIV/0!				#DIV/0!				#DIV/0!				#DIV/0!				#DIV/0!				#DIV/0!				#DIV/0!
		0	0	#DIV/0!	0	0	#DIV/0!		0	0	#DIV/0!				#DIV/0!				#DIV/0!				#DIV/0!				#DIV/0!				#DIV/0!				#DIV/0!				#DIV/0!				#DIV/0!				#DIV/0!
		0	0	#DIV/0!	0	0	#DIV/0!		0	0	#DIV/0!				#DIV/0!				#DIV/0!				#DIV/0!				#DIV/0!				#DIV/0!				#DIV/0!				#DIV/0!				#DIV/0!				#DIV/0!
		0	0	#DIV/0!	0	0	#DIV/0!		0	0	#DIV/0!				#DIV/0!				#DIV/0!				#DIV/0!				#DIV/0!				#DIV/0!				#DIV/0!				#DIV/0!				#DIV/0!				#DIV/0!
		0	0	#DIV/0!	0	0	#DIV/0!		0	0	#DIV/0!				#DIV/0!				#DIV/0!				#DIV/0!				#DIV/0!				#DIV/0!				#DIV/0!				#DIV/0!				#DIV/0!				#DIV/0!
		0	0	#DIV/0!	0	0	#DIV/0!		0	0	#DIV/0!				#DIV/0!				#DIV/0!				#DIV/0!				#DIV/0!				#DIV/0!				#DIV/0!				#DIV/0!				#DIV/0!				#DIV/0!
		0	0	#DIV/0!	0	0	#DIV/0!		0	0	#DIV/0!				#DIV/0!				#DIV/0!				#DIV/0!				#DIV/0!				#DIV/0!				#DIV/0!				#DIV/0!				#DIV/0!				#DIV/0!
		0	0	#DIV/0!	0	0	#DIV/0!		0	0	#DIV/0!				#DIV/0!				#DIV/0!				#DIV/0!				#DIV/0!				#DIV/0!				#DIV/0!				#DIV/0!				#DIV/0!				#DIV/0!
		0	0	#DIV/0!	0	0	#DIV/0!		0	0	#DIV/0!				#DIV/0!				#DIV/0!				#DIV/0!				#DIV/0!				#DIV/0!				#DIV/0!				#DIV/0!				#DIV/0!				#DIV/0!
		0	0	#DIV/0!	0	0	#DIV/0!		0	0	#DIV/0!				#DIV/0!				#DIV/0!				#DIV/0!				#DIV/0!				#DIV/0!				#DIV/0!				#DIV/0!				#DIV/0!				#DIV/0!
		0	0	#DIV/0!	0	0	#DIV/0!		0	0	#DIV/0!				#DIV/0!				#DIV/0!				#DIV/0!				#DIV/0!				#DIV/0!				#DIV/0!				#DIV/0!				#DIV/0!				#DIV/0!
		0	0	#DIV/0!	0	0	#DIV/0!		0	0	#DIV/0!				#DIV/0!				#DIV/0!				#DIV/0!				#DIV/0!				#DIV/0!				#DIV/0!				#DIV/0!				#DIV/0!				#DIV/0!
		0	0	#DIV/0!	0	0	#DIV/0!		0	0	#DIV/0!				#DIV/0!				#DIV/0!				#DIV/0!				#DIV/0!				#DIV/0!				#DIV/0!				#DIV/0!				#DIV/0!				#DIV/0!
		0	0	#DIV/0!	0	0	#DIV/0!		0	0	#DIV/0!				#DIV/0!				#DIV/0!				#DIV/0!				#DIV/0!				#DIV/0!				#DIV/0!				#DIV/0!				#DIV/0!				#DIV/0!
		0	0	#DIV/0!	0	0	#DIV/0!		0	0	#DIV/0!				#DIV/0!				#DIV/0!				#DIV/0!				#DIV/0!				#DIV/0!				#DIV/0!				#DIV/0!				#DIV/0!				#DIV/0!
		0	0	#DIV/0!	0	0	#DIV/0!		0	0	#DIV/0!				#DIV/0!				#DIV/0!				#DIV/0!				#DIV/0!				#DIV/0!				#DIV/0!				#DIV/0!				#DIV/0!				#DIV/0!
		0	0	#DIV/0!	0	0	#DIV/0!		0	0	#DIV/0!				#DIV/0!				#DIV/0!				#DIV/0!				#DIV/0!				#DIV/0!				#DIV/0!				#DIV/0!				#DIV/0!				#DIV/0!
		0	0	#DIV/0!	0	0	#DIV/0!		0	0	#DIV/0!				#DIV/0!				#DIV/0!				#DIV/0!				#DIV/0!				#DIV/0!				#DIV/0!				#DIV/0!				#DIV/0!				#DIV/0!
		0	0	#DIV/0!	0	0	#DIV/0!		0	0	#DIV/0!				#DIV/0!				#DIV/0!				#DIV/0!				#DIV/0!				#DIV/0!				#DIV/0!				#DIV/0!				#DIV/0!				#DIV/0!
		0	0	#DIV/0!	0	0	#DIV/0!		0	0	#DIV/0!				#DIV/0!				#DIV/0!				#DIV/0!				#DIV/0!				#DIV/0!				#DIV/0!				#DIV/0!				#DIV/0!				#DIV/0!
		0	0	#DIV/0!	0	0	#DIV/0!		0	0	#DIV/0!				#DIV/0!				#DIV/0!				#DIV/0!				#DIV/0!				#DIV/0!				#DIV/0!				#DIV/0!				#DIV/0!				#DIV/0!
		0	0	#DIV/0!	0	0	#DIV/0!		0	0	#DIV/0!				#DIV/0!				#DIV/0!				#DIV/0!				#DIV/0!				#DIV/0!				#DIV/0!				#DIV/0!				#DIV/0!				#DIV/0!
		0	0	#DIV/0!	0	0	#DIV/0!		0	0	#DIV/0!				#DIV/0!				#DIV/0!				#DIV/0!				#DIV/0!				#DIV/0!				#DIV/0!				#DIV/0!				#DIV/0!				#DIV/0!
		0	0	#DIV/0!	0	0	#DIV/0!		0	0	#DIV/0!				#DIV/0!				#DIV/0!				#DIV/0!				#DIV/0!				#DIV/0!				#DIV/0!				#DIV/0!				#DIV/0!				#DIV/0!
		0	0	#DIV/0!	0	0	#DIV/0!		0	0	#DIV/0!				#DIV/0!				#DIV/0!				#DIV/0!				#DIV/0!				#DIV/0!				#DIV/0!				#DIV/0!				#DIV/0!				#DIV/0!
		0	0	#DIV/0!	0	0	#DIV/0!		0	0	#DIV/0!				#DIV/0!				#DIV/0!				#DIV/0!				#DIV/0!				#DIV/0!				#DIV/0!				#DIV/0!				#DIV/0!				#DIV/0!
		0	0	#DIV/0!	0	0	#DIV/0!		0	0	#DIV/0!				#DIV/0!				#DIV/0!				#DIV/0!				#DIV/0!				#DIV/0!				#DIV/0!				#DIV/0!				#DIV/0!				#DIV/0!
		0	0	#DIV/0!	0	0	#DIV/0!		0	0	#DIV/0!				#DIV/0!				#DIV/0!				#DIV/0!				#DIV/0!				#DIV/0!				#DIV/0!				#DIV/0!				#DIV/0!				#DIV/0!
		0	0	#DIV/0!	0	0	#DIV/0!		0	0	#DIV/0!				#DIV/0!				#DIV/0!				#DIV/0!				#DIV/0!				#DIV/0!				#DIV/0!				#DIV/0!				#DIV/0!				#DIV/0!
		0	0	#DIV/0!	0	0	#DIV/0!		0	0	#DIV/0!				#DIV/0!				#DIV/0!				#DIV/0!				#DIV/0!				#DIV/0!				#DIV/0!				#DIV/0!				#DIV/0!				#DIV/0!
		0	0	#DIV/0!	0	0	#DIV/0!		0	0	#DIV/0!				#DIV/0!				#DIV/0!				#DIV/0!				#DIV/0!				#DIV/0!				#DIV/0!				#DIV/0!				#DIV/0!				#DIV/0!
		0	0	#DIV/0!	0	0	#DIV/0!		0	0	#DIV/0!				#DIV/0!				#DIV/0!				#DIV/0!				#DIV/0!				#DIV/0!				#DIV/0!				#DIV/0!				#DIV/0!				#DIV/0!
		0	0	#DIV/0!	0	0	#DIV/0!		0	0	#DIV/0!				#DIV/0!				#DIV/0!				#DIV/0!				#DIV/0!				#DIV/0!				#DIV/0!				#DIV/0!				#DIV/0!				#DIV/0!
		0	0	#DIV/0!	0	0	#DIV/0!		0	0	#DIV/0!				#DIV/0!				#DIV/0!				#DIV/0!				#DIV/0!				#DIV/0!				#DIV/0!				#DIV/0!				#DIV/0!				#DIV/0!
		0	0	#DIV/0!	0	0	#DIV/0!		0	0	#DIV/0!				#DIV/0!				#DIV/0!				#DIV/0!				#DIV/0!				#DIV/0!				#DIV/0!				#DIV/0!				#DIV/0!				#DIV/0!
		0	0	#DIV/0!	0	0	#DIV/0!		0	0	#DIV/0!				#DIV/0!				#DIV/0!				#DIV/0!				#DIV/0!				#DIV/0!				#DIV/0!				#DIV/0!				#DIV/0!				#DIV/0!
		0	0	#DIV/0!	0	0	#DIV/0!		0	0	#DIV/0!				#DIV/0!				#DIV/0!				#DIV/0!				#DIV/0!				#DIV/0!				#DIV/0!				#DIV/0!				#DIV/0!				#DIV/0!
		0	0	#DIV/0!	0	0	#DIV/0!		0	0	#DIV/0!				#DIV/0!				#DIV/0!				#DIV/0!				#DIV/0!				#DIV/0!				#DIV/0!				#DIV/0!				#DIV/0!				#DIV/0!
		0	0	#DIV/0!	0	0	#DIV/0!		0	0	#DIV/0!				#DIV/0!				#DIV/0!				#DIV/0!				#DIV/0!				#DIV/0!				#DIV/0!				#DIV/0!				#DIV/0!				#DIV/0!
		0	0	#DIV/0!	0	0	#DIV/0!		0	0	#DIV/0!				#DIV/0!				#DIV/0!				#DIV/0!				#DIV/0!				#DIV/0!				#DIV/0!				#DIV/0!				#DIV/0!				#DIV/0!
		0	0	#DIV/0!	0	0	#DIV/0!		0	0	#DIV/0!				#DIV/0!				#DIV/0!				#DIV/0!				#DIV/0!				#DIV/0!				#DIV/0!				#DIV/0!				#DIV/0!				#DIV/0!
		0	0	#DIV/0!	0	0	#DIV/0!		0	0	#DIV/0!				#DIV/0!				#DIV/0!				#DIV/0!				#DIV/0!				#DIV/0!				#DIV/0!				#DIV/0!				#DIV/0!				#DIV/0!
		0	0	#DIV/0!	0	0	#DIV/0!		0	0	#DIV/0!				#DIV/0!				#DIV/0!				#DIV/0!				#DIV/0!				#DIV/0!				#DIV/0!				#DIV/0!				#DIV/0!				#DIV/0!
		0	0	#DIV/0!	0	0	#DIV/0!		0	0	#DIV/0!				#DIV/0!				#DIV/0!				#DIV/0!				#DIV/0!				#DIV/0!				#DIV/0!				#DIV/0!				#DIV/0!				#DIV/0!
		0	0	#DIV/0!	0	0	#DIV/0!		0	0	#DIV/0!				#DIV/0!				#DIV/0!				#DIV/0!				#DIV/0!				#DIV/0!				#DIV/0!				#DIV/0!				#DIV/0!				#DIV/0!
		0	0	#DIV/0!	0	0	#DIV/0!		0	0	#DIV/0!				#DIV/0!				#DIV/0!				#DIV/0!				#DIV/0!				#DIV/0!				#DIV/0!				#DIV/0!				#DIV/0!				#DIV/0!
		0	0	#DIV/0!	0	0	#DIV/0!		0	0	#DIV/0!				#DIV/0!				#DIV/0!				#DIV/0!				#DIV/0!				#DIV/0!				#DIV/0!				#DIV/0!				#DIV/0!				#DIV/0!
		0	0	#DIV/0!	0	0	#DIV/0!		0	0	#DIV/0!				#DIV/0!				#DIV/0!				#DIV/0!				#DIV/0!				#DIV/0!				#DIV/0!				#DIV/0!				#DIV/0!				#DIV/0!
		0	0	#DIV/0!	0	0	#DIV/0!		0	0	#DIV/0!				#DIV/0!				#DIV/0!				#DIV/0!				#DIV/0!				#DIV/0!				#DIV/0!				#DIV/0!				#DIV/0!				#DIV/0!
		0	0	#DIV/0!	0	0	#DIV/0!		0	0	#DIV/0!				#DIV/0!				#DIV/0!				#DIV/0!				#DIV/0!				#DIV/0!				#DIV/0!				#DIV/0!				#DIV/0!				#DIV/0!
		0	0	#DIV/0!	0	0	#DIV/0!		0	0	#DIV/0!				#DIV/0!				#DIV/0!				#DIV/0!				#DIV/0!				#DIV/0!				#DIV/0!				#DIV/0!				#DIV/0!				#DIV/0!
		0	0	#DIV/0!	0	0	#DIV/0!		0	0	#DIV/0!				#DIV/0!				#DIV/0!				#DIV/0!				#DIV/0!				#DIV/0!				#DIV/0!				#DIV/0!				#DIV/0!				#DIV/0!
		0	0	#DIV/0!	0	0	#DIV/0!		0	0	#DIV/0!				#DIV/0!				#DIV/0!				#DIV/0!				#DIV/0!				#DIV/0!				#DIV/0!				#DIV/0!				#DIV/0!				#DIV/0!
		0	0	#DIV/0!	0	0	#DIV/0!		0	0	#DIV/0!				#DIV/0!				#DIV/0!				#DIV/0!				#DIV/0!				#DIV/0!				#DIV/0!				#DIV/0!				#DIV/0!				#DIV/0!
		0	0	#DIV/0!	0	0	#DIV/0!		0	0	#DIV/0!				#DIV/0!				#DIV/0!				#DIV/0!				#DIV/0!				#DIV/0!				#DIV/0!				#DIV/0!				#DIV/0!				#DIV/0!
		0	0	#DIV/0!	0	0	#DIV/0!		0	0	#DIV/0!				#DIV/0!				#DIV/0!				#DIV/0!				#DIV/0!				#DIV/0!				#DIV/0!				#DIV/0!				#DIV/0!				#DIV/0!
		0	0	#DIV/0!	0	0	#DIV/0!		0	0	#DIV/0!				#DIV/0!				#DIV/0!				#DIV/0!				#DIV/0!				#DIV/0!				#DIV/0!				#DIV/0!				#DIV/0!				#DIV/0!
		0	0	#DIV/0!	0	0	#DIV/0!		0	0	#DIV/0!				#DIV/0!				#DIV/0!				#DIV/0!				#DIV/0!				#DIV/0!				#DIV/0!				#DIV/0!				#DIV/0!				#DIV/0!
		0	0	#DIV/0!	0	0	#DIV/0!		0	0	#DIV/0!				#DIV/0!				#DIV/0!				#DIV/0!				#DIV/0!				#DIV/0!				#DIV/0!				#DIV/0!				#DIV/0!				#DIV/0!
		0	0	#DIV/0!	0	0	#DIV/0!		0	0	#DIV/0!				#DIV/0!				#DIV/0!				#DIV/0!				#DIV/0!				#DIV/0!				#DIV/0!				#DIV/0!				#DIV/0!				#DIV/0!
		0	0	#DIV/0!	0	0	#DIV/0!		0	0	#DIV/0!				#DIV/0!				#DIV/0!				#DIV/0!				#DIV/0!				#DIV/0!				#DIV/0!				#DIV/0!				#DIV/0!				#DIV/0!
		0	0	#DIV/0!	0	0	#DIV/0!		0	0	#DIV/0!				#DIV/0!				#DIV/0!				#DIV/0!				#DIV/0!				#DIV/0!				#DIV/0!				#DIV/0!				#DIV/0!				#DIV/0!
		0	0	#DIV/0!	0	0	#DIV/0!		0	0	#DIV/0!				#DIV/0!				#DIV/0!				#DIV/0!				#DIV/0!				#DIV/0!				#DIV/0!				#DIV/0!				#DIV/0!				#DIV/0!
		0	0	#DIV/0!	0	0	#DIV/0!		0	0	#DIV/0!				#DIV/0!				#DIV/0!				#DIV/0!				#DIV/0!				#DIV/0!				#DIV/0!				#DIV/0!				#DIV/0!				#DIV/0!
		0	0	#DIV/0!	0	0	#DIV/0!		0	0	#DIV/0!				#DIV/0!				#DIV/0!				#DIV/0!				#DIV/0!				#DIV/0!				#DIV/0!				#DIV/0!				#DIV/0!				#DIV/0!
		0	0	#DIV/0!	0	0	#DIV/0!		0	0	#DIV/0!				#DIV/0!				#DIV/0!				#DIV/0!				#DIV/0!				#DIV/0!				#DIV/0!				#DIV/0!				#DIV/0!				#DIV/0!
		0	0	#DIV/0!	0	0	#DIV/0!		0	0	#DIV/0!				#DIV/0!				#DIV/0!				#DIV/0!				#DIV/0!				#DIV/0!				#DIV/0!				#DIV/0!				#DIV/0!				#DIV/0!
		0	0	#DIV/0!	0	0	#DIV/0!		0	0	#DIV/0!				#DIV/0!				#DIV/0!				#DIV/0!				#DIV/0!				#DIV/0!				#DIV/0!				#DIV/0!				#DIV/0!				#DIV/0!
		0	0	#DIV/0!	0	0	#DIV/0!		0	0	#DIV/0!				#DIV/0!				#DIV/0!				#DIV/0!				#DIV/0!				#DIV/0!				#DIV/0!				#DIV/0!				#DIV/0!				#DIV/0!
		0	0	#DIV/0!	0	0	#DIV/0!		0	0	#DIV/0!				#DIV/0!				#DIV/0!				#DIV/0!				#DIV/0!				#DIV/0!				#DIV/0!				#DIV/0!				#DIV/0!				#DIV/0!
		0	0	#DIV/0!	0	0	#DIV/0!		0	0	#DIV/0!				#DIV/0!				#DIV/0!				#DIV/0!				#DIV/0!				#DIV/0!				#DIV/0!				#DIV/0!				#DIV/0!				#DIV/0!
		0	0	#DIV/0!	0	0	#DIV/0!		0	0	#DIV/0!				#DIV/0!				#DIV/0!				#DIV/0!				#DIV/0!				#DIV/0!				#DIV/0!				#DIV/0!				#DIV/0!				#DIV/0!
		0	0	#DIV/0!	0	0	#DIV/0!		0	0	#DIV/0!				#DIV/0!				#DIV/0!				#DIV/0!				#DIV/0!				#DIV/0!				#DIV/0!				#DIV/0!				#DIV/0!				#DIV/0!
		0	0	#DIV/0!	0	0	#DIV/0!		0	0	#DIV/0!				#DIV/0!				#DIV/0!				#DIV/0!				#DIV/0!				#DIV/0!				#DIV/0!				#DIV/0!				#DIV/0!				#DIV/0!
		0	0	#DIV/0!	0	0	#DIV/0!		0	0	#DIV/0!				#DIV/0!				#DIV/0!				#DIV/0!				#DIV/0!				#DIV/0!				#DIV/0!				#DIV/0!				#DIV/0!				#DIV/0!
		0	0	#DIV/0!	0	0	#DIV/0!		0	0	#DIV/0!				#DIV/0!				#DIV/0!				#DIV/0!				#DIV/0!				#DIV/0!				#DIV/0!				#DIV/0!				#DIV/0!				#DIV/0!
		0	0	#DIV/0!	0	0	#DIV/0!		0	0	#DIV/0!				#DIV/0!				#DIV/0!				#DIV/0!				#DIV/0!				#DIV/0!				#DIV/0!				#DIV/0!				#DIV/0!				#DIV/0!
		0	0	#DIV/0!	0	0	#DIV/0!		0	0	#DIV/0!				#DIV/0!				#DIV/0!				#DIV/0!				#DIV/0!				#DIV/0!				#DIV/0!				#DIV/0!				#DIV/0!				#DIV/0!
		0	0	#DIV/0!	0	0	#DIV/0!		0	0	#DIV/0!				#DIV/0!				#DIV/0!				#DIV/0!				#DIV/0!				#DIV/0!				#DIV/0!				#DIV/0!				#DIV/0!				#DIV/0!
		0	0	#DIV/0!	0	0	#DIV/0!		0	0	#DIV/0!				#DIV/0!				#DIV/0!				#DIV/0!				#DIV/0!				#DIV/0!				#DIV/0!				#DIV/0!				#DIV/0!				#DIV/0!
		0	0	#DIV/0!	0	0	#DIV/0!		0	0	#DIV/0!				#DIV/0!				#DIV/0!				#DIV/0!				#DIV/0!				#DIV/0!				#DIV/0!				#DIV/0!				#DIV/0!				#DIV/0!
		0	0	#DIV/0!	0	0	#DIV/0!		0	0	#DIV/0!				#DIV/0!				#DIV/0!				#DIV/0!				#DIV/0!				#DIV/0!				#DIV/0!				#DIV/0!				#DIV/0!				#DIV/0!
		0	0	#DIV/0!	0	0	#DIV/0!		0	0	#DIV/0!				#DIV/0!				#DIV/0!				#DIV/0!				#DIV/0!				#DIV/0!				#DIV/0!				#DIV/0!				#DIV/0!				#DIV/0!
		0	0	#DIV/0!	0	0	#DIV/0!		0	0	#DIV/0!				#DIV/0!				#DIV/0!				#DIV/0!				#DIV/0!				#DIV/0!				#DIV/0!				#DIV/0!				#DIV/0!				#DIV/0!
		0	0	#DIV/0!	0	0	#DIV/0!		0	0	#DIV/0!				#DIV/0!				#DIV/0!				#DIV/0!				#DIV/0!				#DIV/0!				#DIV/0!				#DIV/0!				#DIV/0!				#DIV/0!
		0	0	#DIV/0!	0	0	#DIV/0!		0	0	#DIV/0!				#DIV/0!				#DIV/0!				#DIV/0!				#DIV/0!				#DIV/0!				#DIV/0!				#DIV/0!				#DIV/0!				#DIV/0!
		0	0	#DIV/0!	0	0	#DIV/0!		0	0	#DIV/0!				#DIV/0!				#DIV/0!				#DIV/0!				#DIV/0!				#DIV/0!				#DIV/0!				#DIV/0!				#DIV/0!				#DIV/0!
		0	0	#DIV/0!	0	0	#DIV/0!		0	0	#DIV/0!				#DIV/0!				#DIV/0!				#DIV/0!				#DIV/0!				#DIV/0!				#DIV/0!				#DIV/0!				#DIV/0!				#DIV/0!
		0	0	#DIV/0!	0	0	#DIV/0!		0	0	#DIV/0!				#DIV/0!				#DIV/0!				#DIV/0!				#DIV/0!				#DIV/0!				#DIV/0!				#DIV/0!				#DIV/0!				#DIV/0!
		0	0	#DIV/0!	0	0	#DIV/0!		0	0	#DIV/0!				#DIV/0!				#DIV/0!				#DIV/0!				#DIV/0!				#DIV/0!				#DIV/0!				#DIV/0!				#DIV/0!				#DIV/0!
		0	0	#DIV/0!	0	0	#DIV/0!		0	0	#DIV/0!				#DIV/0!				#DIV/0!				#DIV/0!				#DIV/0!				#DIV/0!				#DIV/0!				#DIV/0!				#DIV/0!				#DIV/0!
		0	0	#DIV/0!	0	0	#DIV/0!		0	0	#DIV/0!				#DIV/0!				#DIV/0!				#DIV/0!				#DIV/0!				#DIV/0!				#DIV/0!				#DIV/0!				#DIV/0!				#DIV/0!
		0	0	#DIV/0!	0	0	#DIV/0!		0	0	#DIV/0!				#DIV/0!				#DIV/0!				#DIV/0!				#DIV/0!				#DIV/0!				#DIV/0!				#DIV/0!				#DIV/0!				#DIV/0!
		0	0	#DIV/0!	0	0	#DIV/0!		0	0	#DIV/0!				#DIV/0!				#DIV/0!				#DIV/0!				#DIV/0!				#DIV/0!				#DIV/0!				#DIV/0!				#DIV/0!				#DIV/0!
		0	0	#DIV/0!	0	0	#DIV/0!		0	0	#DIV/0!				#DIV/0!				#DIV/0!				#DIV/0!				#DIV/0!				#DIV/0!				#DIV/0!				#DIV/0!				#DIV/0!				#DIV/0!
		0	0	#DIV/0!	0	0	#DIV/0!		0	0	#DIV/0!				#DIV/0!				#DIV/0!				#DIV/0!				#DIV/0!				#DIV/0!				#DIV/0!				#DIV/0!				#DIV/0!				#DIV/0!
		0	0	#DIV/0!	0	0	#DIV/0!		0	0	#DIV/0!				#DIV/0!				#DIV/0!				#DIV/0!				#DIV/0!				#DIV/0!				#DIV/0!				#DIV/0!				#DIV/0!				#DIV/0!
		0	0	#DIV/0!	0	0	#DIV/0!		0	0	#DIV/0!				#DIV/0!				#DIV/0!				#DIV/0!				#DIV/0!				#DIV/0!				#DIV/0!				#DIV/0!				#DIV/0!				#DIV/0!
		0	0	#DIV/0!	0	0	#DIV/0!		0	0	#DIV/0!				#DIV/0!				#DIV/0!				#DIV/0!				#DIV/0!				#DIV/0!				#DIV/0!				#DIV/0!				#DIV/0!				#DIV/0!
		0	0	#DIV/0!	0	0	#DIV/0!		0	0	#DIV/0!				#DIV/0!				#DIV/0!				#DIV/0!				#DIV/0!				#DIV/0!				#DIV/0!				#DIV/0!				#DIV/0!				#DIV/0!
		0	0	#DIV/0!	0	0	#DIV/0!		0	0	#DIV/0!				#DIV/0!				#DIV/0!				#DIV/0!				#DIV/0!				#DIV/0!				#DIV/0!				#DIV/0!				#DIV/0!				#DIV/0!
		0	0	#DIV/0!	0	0	#DIV/0!		0	0	#DIV/0!				#DIV/0!				#DIV/0!				#DIV/0!				#DIV/0!				#DIV/0!				#DIV/0!				#DIV/0!				#DIV/0!				#DIV/0!
		0	0	#DIV/0!	0	0	#DIV/0!		0	0	#DIV/0!				#DIV/0!				#DIV/0!				#DIV/0!				#DIV/0!				#DIV/0!				#DIV/0!				#DIV/0!				#DIV/0!				#DIV/0!
		0	0	#DIV/0!	0	0	#DIV/0!		0	0	#DIV/0!				#DIV/0!				#DIV/0!				#DIV/0!				#DIV/0!				#DIV/0!				#DIV/0!				#DIV/0!				#DIV/0!				#DIV/0!
		0	0	#DIV/0!	0	0	#DIV/0!		0	0	#DIV/0!				#DIV/0!				#DIV/0!				#DIV/0!				#DIV/0!				#DIV/0!				#DIV/0!				#DIV/0!				#DIV/0!				#DIV/0!
		0	0	#DIV/0!	0	0	#DIV/0!		0	0	#DIV/0!				#DIV/0!				#DIV/0!				#DIV/0!				#DIV/0!				#DIV/0!				#DIV/0!				#DIV/0!				#DIV/0!				#DIV/0!
		0	0	#DIV/0!	0	0	#DIV/0!		0	0	#DIV/0!				#DIV/0!				#DIV/0!				#DIV/0!				#DIV/0!				#DIV/0!				#DIV/0!				#DIV/0!				#DIV/0!				#DIV/0!
		0	0	#DIV/0!	0	0	#DIV/0!		0	0	#DIV/0!				#DIV/0!				#DIV/0!				#DIV/0!				#DIV/0!				#DIV/0!				#DIV/0!				#DIV/0!				#DIV/0!				#DIV/0!
		0	0	#DIV/0!	0	0	#DIV/0!		0	0	#DIV/0!				#DIV/0!				#DIV/0!				#DIV/0!				#DIV/0!				#DIV/0!				#DIV/0!				#DIV/0!				#DIV/0!				#DIV/0!
		0	0	#DIV/0!	0	0	#DIV/0!		0	0	#DIV/0!				#DIV/0!				#DIV/0!				#DIV/0!				#DIV/0!				#DIV/0!				#DIV/0!				#DIV/0!				#DIV/0!				#DIV/0!
		0	0	#DIV/0!	0	0	#DIV/0!		0	0	#DIV/0!				#DIV/0!				#DIV/0!				#DIV/0!				#DIV/0!				#DIV/0!				#DIV/0!				#DIV/0!				#DIV/0!				#DIV/0!
		0	0	#DIV/0!	0	0	#DIV/0!		0	0	#DIV/0!				#DIV/0!				#DIV/0!				#DIV/0!				#DIV/0!				#DIV/0!				#DIV/0!				#DIV/0!				#DIV/0!				#DIV/0!
		0	0	#DIV/0!	0	0	#DIV/0!		0	0	#DIV/0!				#DIV/0!				#DIV/0!				#DIV/0!				#DIV/0!				#DIV/0!				#DIV/0!				#DIV/0!				#DIV/0!				#DIV/0!
		0	0	#DIV/0!	0	0	#DIV/0!		0	0	#DIV/0!				#DIV/0!				#DIV/0!				#DIV/0!				#DIV/0!				#DIV/0!				#DIV/0!				#DIV/0!				#DIV/0!				#DIV/0!
		0	0	#DIV/0!	0	0	#DIV/0!		0	0	#DIV/0!				#DIV/0!				#DIV/0!				#DIV/0!				#DIV/0!				#DIV/0!				#DIV/0!				#DIV/0!				#DIV/0!				#DIV/0!
		0	0	#DIV/0!	0	0	#DIV/0!		0	0	#DIV/0!				#DIV/0!				#DIV/0!				#DIV/0!				#DIV/0!				#DIV/0!				#DIV/0!				#DIV/0!				#DIV/0!				#DIV/0!
		0	0	#DIV/0!	0	0	#DIV/0!		0	0	#DIV/0!				#DIV/0!				#DIV/0!				#DIV/0!				#DIV/0!				#DIV/0!				#DIV/0!				#DIV/0!				#DIV/0!				#DIV/0!
		0	0	#DIV/0!	0	0	#DIV/0!		0	0	#DIV/0!				#DIV/0!				#DIV/0!				#DIV/0!				#DIV/0!				#DIV/0!				#DIV/0!				#DIV/0!				#DIV/0!				#DIV/0!
		0	0	#DIV/0!	0	0	#DIV/0!		0	0	#DIV/0!				#DIV/0!				#DIV/0!				#DIV/0!				#DIV/0!				#DIV/0!				#DIV/0!				#DIV/0!				#DIV/0!				#DIV/0!
		0	0	#DIV/0!	0	0	#DIV/0!		0	0	#DIV/0!				#DIV/0!				#DIV/0!				#DIV/0!				#DIV/0!				#DIV/0!				#DIV/0!				#DIV/0!				#DIV/0!				#DIV/0!
		0	0	#DIV/0!	0	0	#DIV/0!		0	0	#DIV/0!				#DIV/0!				#DIV/0!				#DIV/0!				#DIV/0!				#DIV/0!				#DIV/0!				#DIV/0!				#DIV/0!				#DIV/0!
		0	0	#DIV/0!	0	0	#DIV/0!		0	0	#DIV/0!				#DIV/0!				#DIV/0!				#DIV/0!				#DIV/0!				#DIV/0!				#DIV/0!				#DIV/0!				#DIV/0!				#DIV/0!
		0	0	#DIV/0!	0	0	#DIV/0!		0	0	#DIV/0!				#DIV/0!				#DIV/0!				#DIV/0!				#DIV/0!				#DIV/0!				#DIV/0!				#DIV/0!				#DIV/0!				#DIV/0!
		0	0	#DIV/0!	0	0	#DIV/0!		0	0	#DIV/0!				#DIV/0!				#DIV/0!				#DIV/0!				#DIV/0!				#DIV/0!				#DIV/0!				#DIV/0!				#DIV/0!				#DIV/0!
		0	0	#DIV/0!	0	0	#DIV/0!		0	0	#DIV/0!				#DIV/0!				#DIV/0!				#DIV/0!				#DIV/0!				#DIV/0!				#DIV/0!				#DIV/0!				#DIV/0!				#DIV/0!
		0	0	#DIV/0!	0	0	#DIV/0!		0	0	#DIV/0!				#DIV/0!				#DIV/0!				#DIV/0!				#DIV/0!				#DIV/0!				#DIV/0!				#DIV/0!				#DIV/0!				#DIV/0!
		0	0	#DIV/0!	0	0	#DIV/0!		0	0	#DIV/0!				#DIV/0!				#DIV/0!				#DIV/0!				#DIV/0!				#DIV/0!				#DIV/0!				#DIV/0!				#DIV/0!				#DIV/0!
		0	0	#DIV/0!	0	0	#DIV/0!		0	0	#DIV/0!				#DIV/0!				#DIV/0!				#DIV/0!				#DIV/0!				#DIV/0!				#DIV/0!				#DIV/0!				#DIV/0!				#DIV/0!
		0	0	#DIV/0!	0	0	#DIV/0!		0	0	#DIV/0!				#DIV/0!				#DIV/0!				#DIV/0!				#DIV/0!				#DIV/0!				#DIV/0!				#DIV/0!				#DIV/0!				#DIV/0!
		0	0	#DIV/0!	0	0	#DIV/0!		0	0	#DIV/0!				#DIV/0!				#DIV/0!				#DIV/0!				#DIV/0!				#DIV/0!				#DIV/0!				#DIV/0!				#DIV/0!				#DIV/0!
		0	0	#DIV/0!	0	0	#DIV/0!		0	0	#DIV/0!				#DIV/0!				#DIV/0!				#DIV/0!				#DIV/0!				#DIV/0!				#DIV/0!				#DIV/0!				#DIV/0!				#DIV/0!
		0	0	#DIV/0!	0	0	#DIV/0!		0	0	#DIV/0!				#DIV/0!				#DIV/0!				#DIV/0!				#DIV/0!				#DIV/0!				#DIV/0!				#DIV/0!				#DIV/0!				#DIV/0!
		0	0	#DIV/0!	0	0	#DIV/0!		0	0	#DIV/0!				#DIV/0!				#DIV/0!				#DIV/0!				#DIV/0!				#DIV/0!				#DIV/0!				#DIV/0!				#DIV/0!				#DIV/0!
		0	0	#DIV/0!	0	0	#DIV/0!		0	0	#DIV/0!				#DIV/0!				#DIV/0!				#DIV/0!				#DIV/0!				#DIV/0!				#DIV/0!				#DIV/0!				#DIV/0!				#DIV/0!
		0	0	#DIV/0!	0	0	#DIV/0!		0	0	#DIV/0!				#DIV/0!				#DIV/0!				#DIV/0!				#DIV/0!				#DIV/0!				#DIV/0!				#DIV/0!				#DIV/0!				#DIV/0!
		0	0	#DIV/0!	0	0	#DIV/0!		0	0	#DIV/0!				#DIV/0!				#DIV/0!				#DIV/0!				#DIV/0!				#DIV/0!				#DIV/0!				#DIV/0!				#DIV/0!				#DIV/0!
		0	0	#DIV/0!	0	0	#DIV/0!		0	0	#DIV/0!				#DIV/0!				#DIV/0!				#DIV/0!				#DIV/0!				#DIV/0!				#DIV/0!				#DIV/0!				#DIV/0!				#DIV/0!
		0	0	#DIV/0!	0	0	#DIV/0!		0	0	#DIV/0!				#DIV/0!				#DIV/0!				#DIV/0!				#DIV/0!				#DIV/0!				#DIV/0!				#DIV/0!				#DIV/0!				#DIV/0!
		0	0	#DIV/0!	0	0	#DIV/0!		0	0	#DIV/0!				#DIV/0!				#DIV/0!				#DIV/0!				#DIV/0!				#DIV/0!				#DIV/0!				#DIV/0!				#DIV/0!				#DIV/0!
		0	0	#DIV/0!	0	0	#DIV/0!		0	0	#DIV/0!				#DIV/0!				#DIV/0!				#DIV/0!				#DIV/0!				#DIV/0!				#DIV/0!				#DIV/0!				#DIV/0!				#DIV/0!
		0	0	#DIV/0!	0	0	#DIV/0!		0	0	#DIV/0!				#DIV/0!				#DIV/0!				#DIV/0!				#DIV/0!				#DIV/0!				#DIV/0!				#DIV/0!				#DIV/0!				#DIV/0!
		0	0	#DIV/0!	0	0	#DIV/0!		0	0	#DIV/0!				#DIV/0!				#DIV/0!				#DIV/0!				#DIV/0!				#DIV/0!				#DIV/0!				#DIV/0!				#DIV/0!				#DIV/0!
		0	0	#DIV/0!	0	0	#DIV/0!		0	0	#DIV/0!				#DIV/0!				#DIV/0!				#DIV/0!				#DIV/0!				#DIV/0!				#DIV/0!				#DIV/0!				#DIV/0!				#DIV/0!
		0	0	#DIV/0!	0	0	#DIV/0!		0	0	#DIV/0!				#DIV/0!				#DIV/0!				#DIV/0!				#DIV/0!				#DIV/0!				#DIV/0!				#DIV/0!				#DIV/0!				#DIV/0!
		0	0	#DIV/0!	0	0	#DIV/0!		0	0	#DIV/0!				#DIV/0!				#DIV/0!				#DIV/0!				#DIV/0!				#DIV/0!				#DIV/0!				#DIV/0!				#DIV/0!				#DIV/0!
		0	0	#DIV/0!	0	0	#DIV/0!		0	0	#DIV/0!				#DIV/0!				#DIV/0!				#DIV/0!				#DIV/0!				#DIV/0!				#DIV/0!				#DIV/0!				#DIV/0!				#DIV/0!
		0	0	#DIV/0!	0	0	#DIV/0!		0	0	#DIV/0!				#DIV/0!				#DIV/0!				#DIV/0!				#DIV/0!				#DIV/0!				#DIV/0!				#DIV/0!				#DIV/0!				#DIV/0!
		0	0	#DIV/0!	0	0	#DIV/0!		0	0	#DIV/0!				#DIV/0!				#DIV/0!				#DIV/0!				#DIV/0!				#DIV/0!				#DIV/0!				#DIV/0!				#DIV/0!				#DIV/0!
		0	0	#DIV/0!	0	0	#DIV/0!		0	0	#DIV/0!				#DIV/0!				#DIV/0!				#DIV/0!				#DIV/0!				#DIV/0!				#DIV/0!				#DIV/0!				#DIV/0!				#DIV/0!
		0	0	#DIV/0!	0	0	#DIV/0!		0	0	#DIV/0!				#DIV/0!				#DIV/0!				#DIV/0!				#DIV/0!				#DIV/0!				#DIV/0!				#DIV/0!				#DIV/0!				#DIV/0!
		0	0	#DIV/0!	0	0	#DIV/0!		0	0	#DIV/0!				#DIV/0!				#DIV/0!				#DIV/0!				#DIV/0!				#DIV/0!				#DIV/0!				#DIV/0!				#DIV/0!				#DIV/0!
		0	0	#DIV/0!	0	0	#DIV/0!		0	0	#DIV/0!				#DIV/0!				#DIV/0!				#DIV/0!				#DIV/0!				#DIV/0!				#DIV/0!				#DIV/0!				#DIV/0!				#DIV/0!
		0	0	#DIV/0!	0	0	#DIV/0!		0	0	#DIV/0!				#DIV/0!				#DIV/0!				#DIV/0!				#DIV/0!				#DIV/0!				#DIV/0!				#DIV/0!				#DIV/0!				#DIV/0!
		0	0	#DIV/0!	0	0	#DIV/0!		0	0	#DIV/0!				#DIV/0!				#DIV/0!				#DIV/0!				#DIV/0!				#DIV/0!				#DIV/0!				#DIV/0!				#DIV/0!				#DIV/0!
		0	0	#DIV/0!	0	0	#DIV/0!		0	0	#DIV/0!				#DIV/0!				#DIV/0!				#DIV/0!				#DIV/0!				#DIV/0!				#DIV/0!				#DIV/0!				#DIV/0!				#DIV/0!
		0	0	#DIV/0!	0	0	#DIV/0!		0	0	#DIV/0!				#DIV/0!				#DIV/0!				#DIV/0!				#DIV/0!				#DIV/0!				#DIV/0!				#DIV/0!				#DIV/0!				#DIV/0!
		0	0	#DIV/0!	0	0	#DIV/0!		0	0	#DIV/0!				#DIV/0!				#DIV/0!				#DIV/0!				#DIV/0!				#DIV/0!				#DIV/0!				#DIV/0!				#DIV/0!				#DIV/0!
		0	0	#DIV/0!	0	0	#DIV/0!		0	0	#DIV/0!				#DIV/0!				#DIV/0!				#DIV/0!				#DIV/0!				#DIV/0!				#DIV/0!				#DIV/0!				#DIV/0!				#DIV/0!
		0	0	#DIV/0!	0	0	#DIV/0!		0	0	#DIV/0!				#DIV/0!				#DIV/0!				#DIV/0!				#DIV/0!				#DIV/0!				#DIV/0!				#DIV/0!				#DIV/0!				#DIV/0!
		0	0	#DIV/0!	0	0	#DIV/0!		0	0	#DIV/0!				#DIV/0!				#DIV/0!				#DIV/0!				#DIV/0!				#DIV/0!				#DIV/0!				#DIV/0!				#DIV/0!				#DIV/0!
		0	0	#DIV/0!	0	0	#DIV/0!		0	0	#DIV/0!				#DIV/0!				#DIV/0!				#DIV/0!				#DIV/0!				#DIV/0!				#DIV/0!				#DIV/0!				#DIV/0!				#DIV/0!
		0	0	#DIV/0!	0	0	#DIV/0!		0	0	#DIV/0!				#DIV/0!				#DIV/0!				#DIV/0!				#DIV/0!				#DIV/0!				#DIV/0!				#DIV/0!				#DIV/0!				#DIV/0!
		0	0	#DIV/0!	0	0	#DIV/0!		0	0	#DIV/0!				#DIV/0!				#DIV/0!				#DIV/0!				#DIV/0!				#DIV/0!				#DIV/0!				#DIV/0!				#DIV/0!				#DIV/0!
		0	0	#DIV/0!	0	0	#DIV/0!		0	0	#DIV/0!				#DIV/0!				#DIV/0!				#DIV/0!				#DIV/0!				#DIV/0!				#DIV/0!				#DIV/0!				#DIV/0!				#DIV/0!
		0	0	#DIV/0!	0	0	#DIV/0!		0	0	#DIV/0!				#DIV/0!				#DIV/0!				#DIV/0!				#DIV/0!				#DIV/0!				#DIV/0!				#DIV/0!				#DIV/0!				#DIV/0!
		0	0	#DIV/0!	0	0	#DIV/0!		0	0	#DIV/0!				#DIV/0!				#DIV/0!				#DIV/0!				#DIV/0!				#DIV/0!				#DIV/0!				#DIV/0!				#DIV/0!				#DIV/0!
		0	0	#DIV/0!	0	0	#DIV/0!		0	0	#DIV/0!				#DIV/0!				#DIV/0!				#DIV/0!				#DIV/0!				#DIV/0!				#DIV/0!				#DIV/0!				#DIV/0!				#DIV/0!
		0	0	#DIV/0!	0	0	#DIV/0!		0	0	#DIV/0!				#DIV/0!				#DIV/0!				#DIV/0!				#DIV/0!				#DIV/0!				#DIV/0!				#DIV/0!				#DIV/0!				#DIV/0!
		0	0	#DIV/0!	0	0	#DIV/0!		0	0	#DIV/0!				#DIV/0!				#DIV/0!				#DIV/0!				#DIV/0!				#DIV/0!				#DIV/0!				#DIV/0!				#DIV/0!				#DIV/0!
		0	0	#DIV/0!	0	0	#DIV/0!		0	0	#DIV/0!				#DIV/0!				#DIV/0!				#DIV/0!				#DIV/0!				#DIV/0!				#DIV/0!				#DIV/0!				#DIV/0!				#DIV/0!
		0	0	#DIV/0!	0	0	#DIV/0!		0	0	#DIV/0!				#DIV/0!				#DIV/0!				#DIV/0!				#DIV/0!				#DIV/0!				#DIV/0!				#DIV/0!				#DIV/0!				#DIV/0!
		0	0	#DIV/0!	0	0	#DIV/0!		0	0	#DIV/0!				#DIV/0!				#DIV/0!				#DIV/0!				#DIV/0!				#DIV/0!				#DIV/0!				#DIV/0!				#DIV/0!				#DIV/0!
		0	0	#DIV/0!	0	0	#DIV/0!		0	0	#DIV/0!				#DIV/0!				#DIV/0!				#DIV/0!				#DIV/0!				#DIV/0!				#DIV/0!				#DIV/0!				#DIV/0!				#DIV/0!
		0	0	#DIV/0!	0	0	#DIV/0!		0	0	#DIV/0!				#DIV/0!				#DIV/0!				#DIV/0!				#DIV/0!				#DIV/0!				#DIV/0!				#DIV/0!				#DIV/0!				#DIV/0!
		0	0	#DIV/0!	0	0	#DIV/0!		0	0	#DIV/0!				#DIV/0!				#DIV/0!				#DIV/0!				#DIV/0!				#DIV/0!				#DIV/0!				#DIV/0!				#DIV/0!				#DIV/0!
		0	0	#DIV/0!	0	0	#DIV/0!		0	0	#DIV/0!				#DIV/0!				#DIV/0!				#DIV/0!				#DIV/0!				#DIV/0!				#DIV/0!				#DIV/0!				#DIV/0!				#DIV/0!
		0	0	#DIV/0!	0	0	#DIV/0!		0	0	#DIV/0!				#DIV/0!				#DIV/0!				#DIV/0!				#DIV/0!				#DIV/0!				#DIV/0!				#DIV/0!				#DIV/0!				#DIV/0!
		0	0	#DIV/0!	0	0	#DIV/0!		0	0	#DIV/0!				#DIV/0!				#DIV/0!				#DIV/0!				#DIV/0!				#DIV/0!				#DIV/0!				#DIV/0!				#DIV/0!				#DIV/0!
		0	0	#DIV/0!	0	0	#DIV/0!		0	0	#DIV/0!				#DIV/0!				#DIV/0!				#DIV/0!				#DIV/0!				#DIV/0!				#DIV/0!				#DIV/0!				#DIV/0!				#DIV/0!
		0	0	#DIV/0!	0	0	#DIV/0!		0	0	#DIV/0!				#DIV/0!				#DIV/0!				#DIV/0!				#DIV/0!				#DIV/0!				#DIV/0!				#DIV/0!				#DIV/0!				#DIV/0!
		0	0	#DIV/0!	0	0	#DIV/0!		0	0	#DIV/0!				#DIV/0!				#DIV/0!				#DIV/0!				#DIV/0!				#DIV/0!				#DIV/0!				#DIV/0!				#DIV/0!				#DIV/0!
		0	0	#DIV/0!	0	0	#DIV/0!		0	0	#DIV/0!				#DIV/0!				#DIV/0!				#DIV/0!				#DIV/0!				#DIV/0!				#DIV/0!				#DIV/0!				#DIV/0!				#DIV/0!
		0	0	#DIV/0!	0	0	#DIV/0!		0	0	#DIV/0!				#DIV/0!				#DIV/0!				#DIV/0!				#DIV/0!				#DIV/0!				#DIV/0!				#DIV/0!				#DIV/0!				#DIV/0!
		0	0	#DIV/0!	0	0	#DIV/0!		0	0	#DIV/0!				#DIV/0!				#DIV/0!				#DIV/0!				#DIV/0!				#DIV/0!				#DIV/0!				#DIV/0!				#DIV/0!				#DIV/0!
		0	0	#DIV/0!	0	0	#DIV/0!		0	0	#DIV/0!				#DIV/0!				#DIV/0!				#DIV/0!				#DIV/0!				#DIV/0!				#DIV/0!				#DIV/0!				#DIV/0!				#DIV/0!
		0	0	#DIV/0!	0	0	#DIV/0!		0	0	#DIV/0!				#DIV/0!				#DIV/0!				#DIV/0!				#DIV/0!				#DIV/0!				#DIV/0!				#DIV/0!				#DIV/0!				#DIV/0!
		0	0	#DIV/0!	0	0	#DIV/0!		0	0	#DIV/0!				#DIV/0!				#DIV/0!				#DIV/0!				#DIV/0!				#DIV/0!				#DIV/0!				#DIV/0!				#DIV/0!				#DIV/0!
		0	0	#DIV/0!	0	0	#DIV/0!		0	0	#DIV/0!				#DIV/0!				#DIV/0!				#DIV/0!				#DIV/0!				#DIV/0!				#DIV/0!				#DIV/0!				#DIV/0!				#DIV/0!
		0	0	#DIV/0!	0	0	#DIV/0!		0	0	#DIV/0!				#DIV/0!				#DIV/0!				#DIV/0!				#DIV/0!				#DIV/0!				#DIV/0!				#DIV/0!				#DIV/0!				#DIV/0!
		0	0	#DIV/0!	0	0	#DIV/0!		0	0	#DIV/0!				#DIV/0!				#DIV/0!				#DIV/0!				#DIV/0!				#DIV/0!				#DIV/0!				#DIV/0!				#DIV/0!				#DIV/0!
		0	0	#DIV/0!	0	0	#DIV/0!		0	0	#DIV/0!				#DIV/0!				#DIV/0!				#DIV/0!				#DIV/0!				#DIV/0!				#DIV/0!				#DIV/0!				#DIV/0!				#DIV/0!
		0	0	#DIV/0!	0	0	#DIV/0!		0	0	#DIV/0!				#DIV/0!				#DIV/0!				#DIV/0!				#DIV/0!				#DIV/0!				#DIV/0!				#DIV/0!				#DIV/0!				#DIV/0!
		0	0	#DIV/0!	0	0	#DIV/0!		0	0	#DIV/0!				#DIV/0!				#DIV/0!				#DIV/0!				#DIV/0!				#DIV/0!				#DIV/0!				#DIV/0!				#DIV/0!				#DIV/0!
		0	0	#DIV/0!	0	0	#DIV/0!		0	0	#DIV/0!				#DIV/0!				#DIV/0!				#DIV/0!				#DIV/0!				#DIV/0!				#DIV/0!				#DIV/0!				#DIV/0!				#DIV/0!
		0	0	#DIV/0!	0	0	#DIV/0!		0	0	#DIV/0!				#DIV/0!				#DIV/0!				#DIV/0!				#DIV/0!				#DIV/0!				#DIV/0!				#DIV/0!				#DIV/0!				#DIV/0!
		0	0	#DIV/0!	0	0	#DIV/0!		0	0	#DIV/0!				#DIV/0!				#DIV/0!				#DIV/0!				#DIV/0!				#DIV/0!				#DIV/0!				#DIV/0!				#DIV/0!				#DIV/0!
		0	0	#DIV/0!	0	0	#DIV/0!		0	0	#DIV/0!				#DIV/0!				#DIV/0!				#DIV/0!				#DIV/0!				#DIV/0!				#DIV/0!				#DIV/0!				#DIV/0!				#DIV/0!
		0	0	#DIV/0!	0	0	#DIV/0!		0	0	#DIV/0!				#DIV/0!				#DIV/0!				#DIV/0!				#DIV/0!				#DIV/0!				#DIV/0!				#DIV/0!				#DIV/0!				#DIV/0!
		0	0	#DIV/0!	0	0	#DIV/0!		0	0	#DIV/0!				#DIV/0!				#DIV/0!				#DIV/0!				#DIV/0!				#DIV/0!				#DIV/0!				#DIV/0!				#DIV/0!				#DIV/0!
		0	0	#DIV/0!	0	0	#DIV/0!		0	0	#DIV/0!				#DIV/0!				#DIV/0!				#DIV/0!				#DIV/0!				#DIV/0!				#DIV/0!				#DIV/0!				#DIV/0!				#DIV/0!
		0	0	#DIV/0!	0	0	#DIV/0!		0	0	#DIV/0!				#DIV/0!				#DIV/0!				#DIV/0!				#DIV/0!				#DIV/0!				#DIV/0!				#DIV/0!				#DIV/0!				#DIV/0!
		0	0	#DIV/0!	0	0	#DIV/0!		0	0	#DIV/0!				#DIV/0!				#DIV/0!				#DIV/0!				#DIV/0!				#DIV/0!				#DIV/0!				#DIV/0!				#DIV/0!				#DIV/0!
		0	0	#DIV/0!	0	0	#DIV/0!		0	0	#DIV/0!				#DIV/0!				#DIV/0!				#DIV/0!				#DIV/0!				#DIV/0!				#DIV/0!				#DIV/0!				#DIV/0!				#DIV/0!
		0	0	#DIV/0!	0	0	#DIV/0!		0	0	#DIV/0!				#DIV/0!				#DIV/0!				#DIV/0!				#DIV/0!				#DIV/0!				#DIV/0!				#DIV/0!				#DIV/0!				#DIV/0!
		0	0	#DIV/0!	0	0	#DIV/0!		0	0	#DIV/0!				#DIV/0!				#DIV/0!				#DIV/0!				#DIV/0!				#DIV/0!				#DIV/0!				#DIV/0!				#DIV/0!				#DIV/0!
		0	0	#DIV/0!	0	0	#DIV/0!		0	0	#DIV/0!				#DIV/0!				#DIV/0!				#DIV/0!				#DIV/0!				#DIV/0!				#DIV/0!				#DIV/0!				#DIV/0!				#DIV/0!
		0	0	#DIV/0!	0	0	#DIV/0!		0	0	#DIV/0!				#DIV/0!				#DIV/0!				#DIV/0!				#DIV/0!				#DIV/0!				#DIV/0!				#DIV/0!				#DIV/0!				#DIV/0!
		0	0	#DIV/0!	0	0	#DIV/0!		0	0	#DIV/0!				#DIV/0!				#DIV/0!				#DIV/0!				#DIV/0!				#DIV/0!				#DIV/0!				#DIV/0!				#DIV/0!				#DIV/0!
		0	0	#DIV/0!	0	0	#DIV/0!		0	0	#DIV/0!				#DIV/0!				#DIV/0!				#DIV/0!				#DIV/0!				#DIV/0!				#DIV/0!				#DIV/0!				#DIV/0!				#DIV/0!
		0	0	#DIV/0!	0	0	#DIV/0!		0	0	#DIV/0!				#DIV/0!				#DIV/0!				#DIV/0!				#DIV/0!				#DIV/0!				#DIV/0!				#DIV/0!				#DIV/0!				#DIV/0!
		0	0	#DIV/0!	0	0	#DIV/0!		0	0	#DIV/0!				#DIV/0!				#DIV/0!				#DIV/0!				#DIV/0!				#DIV/0!				#DIV/0!				#DIV/0!				#DIV/0!				#DIV/0!
		0	0	#DIV/0!	0	0	#DIV/0!		0	0	#DIV/0!				#DIV/0!				#DIV/0!				#DIV/0!				#DIV/0!				#DIV/0!				#DIV/0!				#DIV/0!				#DIV/0!				#DIV/0!
		0	0	#DIV/0!	0	0	#DIV/0!		0	0	#DIV/0!				#DIV/0!				#DIV/0!				#DIV/0!				#DIV/0!				#DIV/0!				#DIV/0!				#DIV/0!				#DIV/0!				#DIV/0!
		0	0	#DIV/0!	0	0	#DIV/0!		0	0	#DIV/0!				#DIV/0!				#DIV/0!				#DIV/0!				#DIV/0!				#DIV/0!				#DIV/0!				#DIV/0!				#DIV/0!				#DIV/0!
		0	0	#DIV/0!	0	0	#DIV/0!		0	0	#DIV/0!				#DIV/0!				#DIV/0!				#DIV/0!				#DIV/0!				#DIV/0!				#DIV/0!				#DIV/0!				#DIV/0!				#DIV/0!
		0	0	#DIV/0!	0	0	#DIV/0!		0	0	#DIV/0!				#DIV/0!				#DIV/0!				#DIV/0!				#DIV/0!				#DIV/0!				#DIV/0!				#DIV/0!				#DIV/0!				#DIV/0!
		0	0	#DIV/0!	0	0	#DIV/0!		0	0	#DIV/0!				#DIV/0!				#DIV/0!				#DIV/0!				#DIV/0!				#DIV/0!				#DIV/0!				#DIV/0!				#DIV/0!				#DIV/0!
		0	0	#DIV/0!	0	0	#DIV/0!		0	0	#DIV/0!				#DIV/0!				#DIV/0!				#DIV/0!				#DIV/0!				#DIV/0!				#DIV/0!				#DIV/0!				#DIV/0!				#DIV/0!
		0	0	#DIV/0!	0	0	#DIV/0!		0	0	#DIV/0!				#DIV/0!				#DIV/0!				#DIV/0!				#DIV/0!				#DIV/0!				#DIV/0!				#DIV/0!				#DIV/0!				#DIV/0!
		0	0	#DIV/0!	0	0	#DIV/0!		0	0	#DIV/0!				#DIV/0!				#DIV/0!				#DIV/0!				#DIV/0!				#DIV/0!				#DIV/0!				#DIV/0!				#DIV/0!				#DIV/0!
		0	0	#DIV/0!	0	0	#DIV/0!		0	0	#DIV/0!				#DIV/0!				#DIV/0!				#DIV/0!				#DIV/0!				#DIV/0!				#DIV/0!				#DIV/0!				#DIV/0!				#DIV/0!
		0	0	#DIV/0!	0	0	#DIV/0!		0	0	#DIV/0!				#DIV/0!				#DIV/0!				#DIV/0!				#DIV/0!				#DIV/0!				#DIV/0!				#DIV/0!				#DIV/0!				#DIV/0!
		0	0	#DIV/0!	0	0	#DIV/0!		0	0	#DIV/0!				#DIV/0!				#DIV/0!				#DIV/0!				#DIV/0!				#DIV/0!				#DIV/0!				#DIV/0!				#DIV/0!				#DIV/0!
		0	0	#DIV/0!	0	0	#DIV/0!		0	0	#DIV/0!				#DIV/0!				#DIV/0!				#DIV/0!				#DIV/0!				#DIV/0!				#DIV/0!				#DIV/0!				#DIV/0!				#DIV/0!
		0	0	#DIV/0!	0	0	#DIV/0!		0	0	#DIV/0!				#DIV/0!				#DIV/0!				#DIV/0!				#DIV/0!				#DIV/0!				#DIV/0!				#DIV/0!				#DIV/0!				#DIV/0!
		0	0	#DIV/0!	0	0	#DIV/0!		0	0	#DIV/0!				#DIV/0!				#DIV/0!				#DIV/0!				#DIV/0!				#DIV/0!				#DIV/0!				#DIV/0!				#DIV/0!				#DIV/0!
		0	0	#DIV/0!	0	0	#DIV/0!		0	0	#DIV/0!				#DIV/0!				#DIV/0!				#DIV/0!				#DIV/0!				#DIV/0!				#DIV/0!				#DIV/0!				#DIV/0!				#DIV/0!
		0	0	#DIV/0!	0	0	#DIV/0!		0	0	#DIV/0!				#DIV/0!				#DIV/0!				#DIV/0!				#DIV/0!				#DIV/0!				#DIV/0!				#DIV/0!				#DIV/0!				#DIV/0!
		0	0	#DIV/0!	0	0	#DIV/0!		0	0	#DIV/0!				#DIV/0!				#DIV/0!				#DIV/0!				#DIV/0!				#DIV/0!				#DIV/0!				#DIV/0!				#DIV/0!				#DIV/0!
		0	0	#DIV/0!	0	0	#DIV/0!		0	0	#DIV/0!				#DIV/0!				#DIV/0!				#DIV/0!				#DIV/0!				#DIV/0!				#DIV/0!				#DIV/0!				#DIV/0!				#DIV/0!
		0	0	#DIV/0!	0	0	#DIV/0!		0	0	#DIV/0!				#DIV/0!				#DIV/0!				#DIV/0!				#DIV/0!				#DIV/0!				#DIV/0!				#DIV/0!				#DIV/0!				#DIV/0!
		0	0	#DIV/0!	0	0	#DIV/0!		0	0	#DIV/0!				#DIV/0!				#DIV/0!				#DIV/0!				#DIV/0!				#DIV/0!				#DIV/0!				#DIV/0!				#DIV/0!				#DIV/0!
		0	0	#DIV/0!	0	0	#DIV/0!		0	0	#DIV/0!				#DIV/0!				#DIV/0!				#DIV/0!				#DIV/0!				#DIV/0!				#DIV/0!				#DIV/0!				#DIV/0!				#DIV/0!
		0	0	#DIV/0!	0	0	#DIV/0!		0	0	#DIV/0!				#DIV/0!				#DIV/0!				#DIV/0!				#DIV/0!				#DIV/0!				#DIV/0!				#DIV/0!				#DIV/0!				#DIV/0!
		0	0	#DIV/0!	0	0	#DIV/0!		0	0	#DIV/0!				#DIV/0!				#DIV/0!				#DIV/0!				#DIV/0!				#DIV/0!				#DIV/0!				#DIV/0!				#DIV/0!				#DIV/0!
		0	0	#DIV/0!	0	0	#DIV/0!		0	0	#DIV/0!				#DIV/0!				#DIV/0!				#DIV/0!				#DIV/0!				#DIV/0!				#DIV/0!				#DIV/0!				#DIV/0!				#DIV/0!
		0	0	#DIV/0!	0	0	#DIV/0!		0	0	#DIV/0!				#DIV/0!				#DIV/0!				#DIV/0!				#DIV/0!				#DIV/0!				#DIV/0!				#DIV/0!				#DIV/0!				#DIV/0!
		0	0	#DIV/0!	0	0	#DIV/0!		0	0	#DIV/0!				#DIV/0!				#DIV/0!				#DIV/0!				#DIV/0!				#DIV/0!				#DIV/0!				#DIV/0!				#DIV/0!				#DIV/0!
		0	0	#DIV/0!	0	0	#DIV/0!		0	0	#DIV/0!				#DIV/0!				#DIV/0!				#DIV/0!				#DIV/0!				#DIV/0!				#DIV/0!				#DIV/0!				#DIV/0!				#DIV/0!
		0	0	#DIV/0!	0	0	#DIV/0!		0	0	#DIV/0!				#DIV/0!				#DIV/0!				#DIV/0!				#DIV/0!				#DIV/0!				#DIV/0!				#DIV/0!				#DIV/0!				#DIV/0!
		0	0	#DIV/0!	0	0	#DIV/0!		0	0	#DIV/0!				#DIV/0!				#DIV/0!				#DIV/0!				#DIV/0!				#DIV/0!				#DIV/0!				#DIV/0!				#DIV/0!				#DIV/0!
		0	0	#DIV/0!	0	0	#DIV/0!		0	0	#DIV/0!				#DIV/0!				#DIV/0!				#DIV/0!				#DIV/0!				#DIV/0!				#DIV/0!				#DIV/0!				#DIV/0!				#DIV/0!
		0	0	#DIV/0!	0	0	#DIV/0!		0	0	#DIV/0!				#DIV/0!				#DIV/0!				#DIV/0!				#DIV/0!				#DIV/0!				#DIV/0!				#DIV/0!				#DIV/0!				#DIV/0!
		0	0	#DIV/0!	0	0	#DIV/0!		0	0	#DIV/0!				#DIV/0!				#DIV/0!				#DIV/0!				#DIV/0!				#DIV/0!				#DIV/0!				#DIV/0!				#DIV/0!				#DIV/0!
		0	0	#DIV/0!	0	0	#DIV/0!		0	0	#DIV/0!				#DIV/0!				#DIV/0!				#DIV/0!				#DIV/0!				#DIV/0!				#DIV/0!				#DIV/0!				#DIV/0!				#DIV/0!
		0	0	#DIV/0!	0	0	#DIV/0!		0	0	#DIV/0!				#DIV/0!				#DIV/0!				#DIV/0!				#DIV/0!				#DIV/0!				#DIV/0!				#DIV/0!				#DIV/0!				#DIV/0!
		0	0	#DIV/0!	0	0	#DIV/0!		0	0	#DIV/0!				#DIV/0!				#DIV/0!				#DIV/0!				#DIV/0!				#DIV/0!				#DIV/0!				#DIV/0!				#DIV/0!				#DIV/0!
		0	0	#DIV/0!	0	0	#DIV/0!		0	0	#DIV/0!				#DIV/0!				#DIV/0!				#DIV/0!				#DIV/0!				#DIV/0!				#DIV/0!				#DIV/0!				#DIV/0!				#DIV/0!
		0	0	#DIV/0!	0	0	#DIV/0!		0	0	#DIV/0!				#DIV/0!				#DIV/0!				#DIV/0!				#DIV/0!				#DIV/0!				#DIV/0!				#DIV/0!				#DIV/0!				#DIV/0!
		0	0	#DIV/0!	0	0	#DIV/0!		0	0	#DIV/0!				#DIV/0!				#DIV/0!				#DIV/0!				#DIV/0!				#DIV/0!				#DIV/0!				#DIV/0!				#DIV/0!				#DIV/0!
		0	0	#DIV/0!	0	0	#DIV/0!		0	0	#DIV/0!				#DIV/0!				#DIV/0!				#DIV/0!				#DIV/0!				#DIV/0!				#DIV/0!				#DIV/0!				#DIV/0!				#DIV/0!
		0	0	#DIV/0!	0	0	#DIV/0!		0	0	#DIV/0!				#DIV/0!				#DIV/0!				#DIV/0!				#DIV/0!				#DIV/0!				#DIV/0!				#DIV/0!				#DIV/0!				#DIV/0!
		0	0	#DIV/0!	0	0	#DIV/0!		0	0	#DIV/0!				#DIV/0!				#DIV/0!				#DIV/0!				#DIV/0!				#DIV/0!				#DIV/0!				#DIV/0!				#DIV/0!				#DIV/0!
		0	0	#DIV/0!	0	0	#DIV/0!		0	0	#DIV/0!				#DIV/0!				#DIV/0!				#DIV/0!				#DIV/0!				#DIV/0!				#DIV/0!				#DIV/0!				#DIV/0!				#DIV/0!
		0	0	#DIV/0!	0	0	#DIV/0!		0	0	#DIV/0!				#DIV/0!				#DIV/0!				#DIV/0!				#DIV/0!				#DIV/0!				#DIV/0!				#DIV/0!				#DIV/0!				#DIV/0!
		0	0	#DIV/0!	0	0	#DIV/0!		0	0	#DIV/0!				#DIV/0!				#DIV/0!				#DIV/0!				#DIV/0!				#DIV/0!				#DIV/0!				#DIV/0!				#DIV/0!				#DIV/0!
		0	0	#DIV/0!	0	0	#DIV/0!		0	0	#DIV/0!				#DIV/0!				#DIV/0!				#DIV/0!				#DIV/0!				#DIV/0!				#DIV/0!				#DIV/0!				#DIV/0!				#DIV/0!
		0	0	#DIV/0!	0	0	#DIV/0!		0	0	#DIV/0!				#DIV/0!				#DIV/0!				#DIV/0!				#DIV/0!				#DIV/0!				#DIV/0!				#DIV/0!				#DIV/0!				#DIV/0!
		0	0	#DIV/0!	0	0	#DIV/0!		0	0	#DIV/0!				#DIV/0!				#DIV/0!				#DIV/0!				#DIV/0!				#DIV/0!				#DIV/0!				#DIV/0!				#DIV/0!				#DIV/0!
		0	0	#DIV/0!	0	0	#DIV/0!		0	0	#DIV/0!				#DIV/0!				#DIV/0!				#DIV/0!				#DIV/0!				#DIV/0!				#DIV/0!				#DIV/0!				#DIV/0!				#DIV/0!
		0	0	#DIV/0!	0	0	#DIV/0!		0	0	#DIV/0!				#DIV/0!				#DIV/0!				#DIV/0!				#DIV/0!				#DIV/0!				#DIV/0!				#DIV/0!				#DIV/0!				#DIV/0!
		0	0	#DIV/0!	0	0	#DIV/0!		0	0	#DIV/0!				#DIV/0!				#DIV/0!				#DIV/0!				#DIV/0!				#DIV/0!				#DIV/0!				#DIV/0!				#DIV/0!				#DIV/0!
		0	0	#DIV/0!	0	0	#DIV/0!		0	0	#DIV/0!				#DIV/0!				#DIV/0!				#DIV/0!				#DIV/0!				#DIV/0!				#DIV/0!				#DIV/0!				#DIV/0!				#DIV/0!
		0	0	#DIV/0!	0	0	#DIV/0!		0	0	#DIV/0!				#DIV/0!				#DIV/0!				#DIV/0!				#DIV/0!				#DIV/0!				#DIV/0!				#DIV/0!				#DIV/0!				#DIV/0!
		0	0	#DIV/0!	0	0	#DIV/0!		0	0	#DIV/0!				#DIV/0!				#DIV/0!				#DIV/0!				#DIV/0!				#DIV/0!				#DIV/0!				#DIV/0!				#DIV/0!				#DIV/0!
		0	0	#DIV/0!	0	0	#DIV/0!		0	0	#DIV/0!				#DIV/0!				#DIV/0!				#DIV/0!				#DIV/0!				#DIV/0!				#DIV/0!				#DIV/0!				#DIV/0!				#DIV/0!
		0	0	#DIV/0!	0	0	#DIV/0!		0	0	#DIV/0!				#DIV/0!				#DIV/0!				#DIV/0!				#DIV/0!				#DIV/0!				#DIV/0!				#DIV/0!				#DIV/0!				#DIV/0!
		0	0	#DIV/0!	0	0	#DIV/0!		0	0	#DIV/0!				#DIV/0!				#DIV/0!				#DIV/0!				#DIV/0!				#DIV/0!				#DIV/0!				#DIV/0!				#DIV/0!				#DIV/0!
		0	0	#DIV/0!	0	0	#DIV/0!		0	0	#DIV/0!				#DIV/0!				#DIV/0!				#DIV/0!				#DIV/0!				#DIV/0!				#DIV/0!				#DIV/0!				#DIV/0!				#DIV/0!
		0	0	#DIV/0!	0	0	#DIV/0!		0	0	#DIV/0!				#DIV/0!				#DIV/0!				#DIV/0!				#DIV/0!				#DIV/0!				#DIV/0!				#DIV/0!				#DIV/0!				#DIV/0!
		0	0	#DIV/0!	0	0	#DIV/0!		0	0	#DIV/0!				#DIV/0!				#DIV/0!				#DIV/0!				#DIV/0!				#DIV/0!				#DIV/0!				#DIV/0!				#DIV/0!				#DIV/0!
		0	0	#DIV/0!	0	0	#DIV/0!		0	0	#DIV/0!				#DIV/0!				#DIV/0!				#DIV/0!				#DIV/0!				#DIV/0!				#DIV/0!				#DIV/0!				#DIV/0!				#DIV/0!
		0	0	#DIV/0!	0	0	#DIV/0!		0	0	#DIV/0!				#DIV/0!				#DIV/0!				#DIV/0!				#DIV/0!				#DIV/0!				#DIV/0!				#DIV/0!				#DIV/0!				#DIV/0!
		0	0	#DIV/0!	0	0	#DIV/0!		0	0	#DIV/0!				#DIV/0!				#DIV/0!				#DIV/0!				#DIV/0!				#DIV/0!				#DIV/0!				#DIV/0!				#DIV/0!				#DIV/0!
		0	0	#DIV/0!	0	0	#DIV/0!		0	0	#DIV/0!				#DIV/0!				#DIV/0!				#DIV/0!				#DIV/0!				#DIV/0!				#DIV/0!				#DIV/0!				#DIV/0!				#DIV/0!
		0	0	#DIV/0!	0	0	#DIV/0!		0	0	#DIV/0!				#DIV/0!				#DIV/0!				#DIV/0!				#DIV/0!				#DIV/0!				#DIV/0!				#DIV/0!				#DIV/0!				#DIV/0!
		0	0	#DIV/0!	0	0	#DIV/0!		0	0	#DIV/0!				#DIV/0!				#DIV/0!				#DIV/0!				#DIV/0!				#DIV/0!				#DIV/0!				#DIV/0!				#DIV/0!				#DIV/0!
		0	0	#DIV/0!	0	0	#DIV/0!		0	0	#DIV/0!				#DIV/0!				#DIV/0!				#DIV/0!				#DIV/0!				#DIV/0!				#DIV/0!				#DIV/0!				#DIV/0!				#DIV/0!
		0	0	#DIV/0!	0	0	#DIV/0!		0	0	#DIV/0!				#DIV/0!				#DIV/0!				#DIV/0!				#DIV/0!				#DIV/0!				#DIV/0!				#DIV/0!				#DIV/0!				#DIV/0!
		0	0	#DIV/0!	0	0	#DIV/0!		0	0	#DIV/0!				#DIV/0!				#DIV/0!				#DIV/0!				#DIV/0!				#DIV/0!				#DIV/0!				#DIV/0!				#DIV/0!				#DIV/0!
		0	0	#DIV/0!	0	0	#DIV/0!		0	0	#DIV/0!				#DIV/0!				#DIV/0!				#DIV/0!				#DIV/0!				#DIV/0!				#DIV/0!				#DIV/0!				#DIV/0!				#DIV/0!
		0	0	#DIV/0!	0	0	#DIV/0!		0	0	#DIV/0!				#DIV/0!				#DIV/0!				#DIV/0!				#DIV/0!				#DIV/0!				#DIV/0!				#DIV/0!				#DIV/0!				#DIV/0!
		0	0	#DIV/0!	0	0	#DIV/0!		0	0	#DIV/0!				#DIV/0!				#DIV/0!				#DIV/0!				#DIV/0!				#DIV/0!				#DIV/0!				#DIV/0!				#DIV/0!				#DIV/0!
		0	0	#DIV/0!	0	0	#DIV/0!		0	0	#DIV/0!				#DIV/0!				#DIV/0!				#DIV/0!				#DIV/0!				#DIV/0!				#DIV/0!				#DIV/0!				#DIV/0!				#DIV/0!
		0	0	#DIV/0!	0	0	#DIV/0!		0	0	#DIV/0!				#DIV/0!				#DIV/0!				#DIV/0!				#DIV/0!				#DIV/0!				#DIV/0!				#DIV/0!				#DIV/0!				#DIV/0!
		0	0	#DIV/0!	0	0	#DIV/0!		0	0	#DIV/0!				#DIV/0!				#DIV/0!				#DIV/0!				#DIV/0!				#DIV/0!				#DIV/0!				#DIV/0!				#DIV/0!				#DIV/0!
		0	0	#DIV/0!	0	0	#DIV/0!		0	0	#DIV/0!				#DIV/0!				#DIV/0!				#DIV/0!				#DIV/0!				#DIV/0!				#DIV/0!				#DIV/0!				#DIV/0!				#DIV/0!
		0	0	#DIV/0!	0	0	#DIV/0!		0	0	#DIV/0!				#DIV/0!				#DIV/0!				#DIV/0!				#DIV/0!				#DIV/0!				#DIV/0!				#DIV/0!				#DIV/0!				#DIV/0!
		0	0	#DIV/0!	0	0	#DIV/0!		0	0	#DIV/0!				#DIV/0!				#DIV/0!				#DIV/0!				#DIV/0!				#DIV/0!				#DIV/0!				#DIV/0!				#DIV/0!				#DIV/0!
		0	0	#DIV/0!	0	0	#DIV/0!		0	0	#DIV/0!				#DIV/0!				#DIV/0!				#DIV/0!				#DIV/0!				#DIV/0!				#DIV/0!				#DIV/0!				#DIV/0!				#DIV/0!
		0	0	#DIV/0!	0	0	#DIV/0!		0	0	#DIV/0!				#DIV/0!				#DIV/0!				#DIV/0!				#DIV/0!				#DIV/0!				#DIV/0!				#DIV/0!				#DIV/0!				#DIV/0!
		0	0	#DIV/0!	0	0	#DIV/0!		0	0	#DIV/0!				#DIV/0!				#DIV/0!				#DIV/0!				#DIV/0!				#DIV/0!				#DIV/0!				#DIV/0!				#DIV/0!				#DIV/0!
		0	0	#DIV/0!	0	0	#DIV/0!		0	0	#DIV/0!				#DIV/0!				#DIV/0!				#DIV/0!				#DIV/0!				#DIV/0!				#DIV/0!				#DIV/0!				#DIV/0!				#DIV/0!
		0	0	#DIV/0!	0	0	#DIV/0!		0	0	#DIV/0!				#DIV/0!				#DIV/0!				#DIV/0!				#DIV/0!				#DIV/0!				#DIV/0!				#DIV/0!				#DIV/0!				#DIV/0!
		0	0	#DIV/0!	0	0	#DIV/0!		0	0	#DIV/0!				#DIV/0!				#DIV/0!				#DIV/0!				#DIV/0!				#DIV/0!				#DIV/0!				#DIV/0!				#DIV/0!				#DIV/0!
		0	0	#DIV/0!	0	0	#DIV/0!		0	0	#DIV/0!				#DIV/0!				#DIV/0!				#DIV/0!				#DIV/0!				#DIV/0!				#DIV/0!				#DIV/0!				#DIV/0!				#DIV/0!
		0	0	#DIV/0!	0	0	#DIV/0!		0	0	#DIV/0!				#DIV/0!				#DIV/0!				#DIV/0!				#DIV/0!				#DIV/0!				#DIV/0!				#DIV/0!				#DIV/0!				#DIV/0!
		0	0	#DIV/0!	0	0	#DIV/0!		0	0	#DIV/0!				#DIV/0!				#DIV/0!				#DIV/0!				#DIV/0!				#DIV/0!				#DIV/0!				#DIV/0!				#DIV/0!				#DIV/0!
		0	0	#DIV/0!	0	0	#DIV/0!		0	0	#DIV/0!				#DIV/0!				#DIV/0!				#DIV/0!				#DIV/0!				#DIV/0!				#DIV/0!				#DIV/0!				#DIV/0!				#DIV/0!
		0	0	#DIV/0!	0	0	#DIV/0!		0	0	#DIV/0!				#DIV/0!				#DIV/0!				#DIV/0!				#DIV/0!				#DIV/0!				#DIV/0!				#DIV/0!				#DIV/0!				#DIV/0!
		0	0	#DIV/0!	0	0	#DIV/0!		0	0	#DIV/0!				#DIV/0!				#DIV/0!				#DIV/0!				#DIV/0!				#DIV/0!				#DIV/0!				#DIV/0!				#DIV/0!				#DIV/0!
		0	0	#DIV/0!	0	0	#DIV/0!		0	0	#DIV/0!				#DIV/0!				#DIV/0!				#DIV/0!				#DIV/0!				#DIV/0!				#DIV/0!				#DIV/0!				#DIV/0!				#DIV/0!
		0	0	#DIV/0!	0	0	#DIV/0!		0	0	#DIV/0!				#DIV/0!				#DIV/0!				#DIV/0!				#DIV/0!				#DIV/0!				#DIV/0!				#DIV/0!				#DIV/0!				#DIV/0!
		0	0	#DIV/0!	0	0	#DIV/0!		0	0	#DIV/0!				#DIV/0!				#DIV/0!				#DIV/0!				#DIV/0!				#DIV/0!				#DIV/0!				#DIV/0!				#DIV/0!				#DIV/0!
		0	0	#DIV/0!	0	0	#DIV/0!		0	0	#DIV/0!				#DIV/0!				#DIV/0!				#DIV/0!				#DIV/0!				#DIV/0!				#DIV/0!				#DIV/0!				#DIV/0!				#DIV/0!
		0	0	#DIV/0!	0	0	#DIV/0!		0	0	#DIV/0!				#DIV/0!				#DIV/0!				#DIV/0!				#DIV/0!				#DIV/0!				#DIV/0!				#DIV/0!				#DIV/0!				#DIV/0!
		0	0	#DIV/0!	0	0	#DIV/0!		0	0	#DIV/0!				#DIV/0!				#DIV/0!				#DIV/0!				#DIV/0!				#DIV/0!				#DIV/0!				#DIV/0!				#DIV/0!				#DIV/0!
		0	0	#DIV/0!	0	0	#DIV/0!		0	0	#DIV/0!				#DIV/0!				#DIV/0!				#DIV/0!				#DIV/0!				#DIV/0!				#DIV/0!				#DIV/0!				#DIV/0!				#DIV/0!
		0	0	#DIV/0!	0	0	#DIV/0!		0	0	#DIV/0!				#DIV/0!				#DIV/0!				#DIV/0!				#DIV/0!				#DIV/0!				#DIV/0!				#DIV/0!				#DIV/0!				#DIV/0!
		0	0	#DIV/0!	0	0	#DIV/0!		0	0	#DIV/0!				#DIV/0!				#DIV/0!				#DIV/0!				#DIV/0!				#DIV/0!				#DIV/0!				#DIV/0!				#DIV/0!				#DIV/0!
		0	0	#DIV/0!	0	0	#DIV/0!		0	0	#DIV/0!				#DIV/0!				#DIV/0!				#DIV/0!				#DIV/0!				#DIV/0!				#DIV/0!				#DIV/0!				#DIV/0!				#DIV/0!
		0	0	#DIV/0!	0	0	#DIV/0!		0	0	#DIV/0!				#DIV/0!				#DIV/0!				#DIV/0!				#DIV/0!				#DIV/0!				#DIV/0!				#DIV/0!				#DIV/0!				#DIV/0!
		0	0	#DIV/0!	0	0	#DIV/0!		0	0	#DIV/0!				#DIV/0!				#DIV/0!				#DIV/0!				#DIV/0!				#DIV/0!				#DIV/0!				#DIV/0!				#DIV/0!				#DIV/0!
		0	0	#DIV/0!	0	0	#DIV/0!		0	0	#DIV/0!				#DIV/0!				#DIV/0!				#DIV/0!				#DIV/0!				#DIV/0!				#DIV/0!				#DIV/0!				#DIV/0!				#DIV/0!
		0	0	#DIV/0!	0	0	#DIV/0!		0	0	#DIV/0!				#DIV/0!				#DIV/0!				#DIV/0!				#DIV/0!				#DIV/0!				#DIV/0!				#DIV/0!				#DIV/0!				#DIV/0!
		0	0	#DIV/0!	0	0	#DIV/0!		0	0	#DIV/0!				#DIV/0!				#DIV/0!				#DIV/0!				#DIV/0!				#DIV/0!				#DIV/0!				#DIV/0!				#DIV/0!				#DIV/0!
		0	0	#DIV/0!	0	0	#DIV/0!		0	0	#DIV/0!				#DIV/0!				#DIV/0!				#DIV/0!				#DIV/0!				#DIV/0!				#DIV/0!				#DIV/0!				#DIV/0!				#DIV/0!
		0	0	#DIV/0!	0	0	#DIV/0!		0	0	#DIV/0!				#DIV/0!				#DIV/0!				#DIV/0!				#DIV/0!				#DIV/0!				#DIV/0!				#DIV/0!				#DIV/0!				#DIV/0!
		0	0	#DIV/0!	0	0	#DIV/0!		0	0	#DIV/0!				#DIV/0!				#DIV/0!				#DIV/0!				#DIV/0!				#DIV/0!				#DIV/0!				#DIV/0!				#DIV/0!				#DIV/0!
		0	0	#DIV/0!	0	0	#DIV/0!		0	0	#DIV/0!				#DIV/0!				#DIV/0!				#DIV/0!				#DIV/0!				#DIV/0!				#DIV/0!				#DIV/0!				#DIV/0!				#DIV/0!
		0	0	#DIV/0!	0	0	#DIV/0!		0	0	#DIV/0!				#DIV/0!				#DIV/0!				#DIV/0!				#DIV/0!				#DIV/0!				#DIV/0!				#DIV/0!				#DIV/0!				#DIV/0!
		0	0	#DIV/0!	0	0	#DIV/0!		0	0	#DIV/0!				#DIV/0!				#DIV/0!				#DIV/0!				#DIV/0!				#DIV/0!				#DIV/0!				#DIV/0!				#DIV/0!				#DIV/0!
		0	0	#DIV/0!	0	0	#DIV/0!		0	0	#DIV/0!				#DIV/0!				#DIV/0!				#DIV/0!				#DIV/0!				#DIV/0!				#DIV/0!				#DIV/0!				#DIV/0!				#DIV/0!
		0	0	#DIV/0!	0	0	#DIV/0!		0	0	#DIV/0!				#DIV/0!				#DIV/0!				#DIV/0!				#DIV/0!				#DIV/0!				#DIV/0!				#DIV/0!				#DIV/0!				#DIV/0!
		0	0	#DIV/0!	0	0	#DIV/0!		0	0	#DIV/0!				#DIV/0!				#DIV/0!				#DIV/0!				#DIV/0!				#DIV/0!				#DIV/0!				#DIV/0!				#DIV/0!				#DIV/0!
		0	0	#DIV/0!	0	0	#DIV/0!		0	0	#DIV/0!				#DIV/0!				#DIV/0!				#DIV/0!				#DIV/0!				#DIV/0!				#DIV/0!				#DIV/0!				#DIV/0!				#DIV/0!
		0	0	#DIV/0!	0	0	#DIV/0!		0	0	#DIV/0!				#DIV/0!				#DIV/0!				#DIV/0!				#DIV/0!				#DIV/0!				#DIV/0!				#DIV/0!				#DIV/0!				#DIV/0!
		0	0	#DIV/0!	0	0	#DIV/0!		0	0	#DIV/0!				#DIV/0!				#DIV/0!				#DIV/0!				#DIV/0!				#DIV/0!				#DIV/0!				#DIV/0!				#DIV/0!				#DIV/0!
		0	0	#DIV/0!	0	0	#DIV/0!		0	0	#DIV/0!				#DIV/0!				#DIV/0!				#DIV/0!				#DIV/0!				#DIV/0!				#DIV/0!				#DIV/0!				#DIV/0!				#DIV/0!
		0	0	#DIV/0!	0	0	#DIV/0!		0	0	#DIV/0!				#DIV/0!				#DIV/0!				#DIV/0!				#DIV/0!				#DIV/0!				#DIV/0!				#DIV/0!				#DIV/0!				#DIV/0!
		0	0	#DIV/0!	0	0	#DIV/0!		0	0	#DIV/0!				#DIV/0!				#DIV/0!				#DIV/0!				#DIV/0!				#DIV/0!				#DIV/0!				#DIV/0!				#DIV/0!				#DIV/0!
		0	0	#DIV/0!	0	0	#DIV/0!		0	0	#DIV/0!				#DIV/0!				#DIV/0!				#DIV/0!				#DIV/0!				#DIV/0!				#DIV/0!				#DIV/0!				#DIV/0!				#DIV/0!
		0	0	#DIV/0!	0	0	#DIV/0!		0	0	#DIV/0!				#DIV/0!				#DIV/0!				#DIV/0!				#DIV/0!				#DIV/0!				#DIV/0!				#DIV/0!				#DIV/0!				#DIV/0!
		0	0	#DIV/0!	0	0	#DIV/0!		0	0	#DIV/0!				#DIV/0!				#DIV/0!				#DIV/0!				#DIV/0!				#DIV/0!				#DIV/0!				#DIV/0!				#DIV/0!				#DIV/0!
		0	0	#DIV/0!	0	0	#DIV/0!		0	0	#DIV/0!				#DIV/0!				#DIV/0!				#DIV/0!				#DIV/0!				#DIV/0!				#DIV/0!				#DIV/0!				#DIV/0!				#DIV/0!
		0	0	#DIV/0!	0	0	#DIV/0!		0	0	#DIV/0!				#DIV/0!				#DIV/0!				#DIV/0!				#DIV/0!				#DIV/0!				#DIV/0!				#DIV/0!				#DIV/0!				#DIV/0!
		0	0	#DIV/0!	0	0	#DIV/0!		0	0	#DIV/0!				#DIV/0!				#DIV/0!				#DIV/0!				#DIV/0!				#DIV/0!				#DIV/0!				#DIV/0!				#DIV/0!				#DIV/0!
		0	0	#DIV/0!	0	0	#DIV/0!		0	0	#DIV/0!				#DIV/0!				#DIV/0!				#DIV/0!				#DIV/0!				#DIV/0!				#DIV/0!				#DIV/0!				#DIV/0!				#DIV/0!
		0	0	#DIV/0!	0	0	#DIV/0!		0	0	#DIV/0!				#DIV/0!				#DIV/0!				#DIV/0!				#DIV/0!				#DIV/0!				#DIV/0!				#DIV/0!				#DIV/0!				#DIV/0!
		0	0	#DIV/0!	0	0	#DIV/0!		0	0	#DIV/0!				#DIV/0!				#DIV/0!				#DIV/0!				#DIV/0!				#DIV/0!				#DIV/0!				#DIV/0!				#DIV/0!				#DIV/0!
		0	0	#DIV/0!	0	0	#DIV/0!		0	0	#DIV/0!				#DIV/0!				#DIV/0!				#DIV/0!				#DIV/0!				#DIV/0!				#DIV/0!				#DIV/0!				#DIV/0!				#DIV/0!
		0	0	#DIV/0!	0	0	#DIV/0!		0	0	#DIV/0!				#DIV/0!				#DIV/0!				#DIV/0!				#DIV/0!				#DIV/0!				#DIV/0!				#DIV/0!				#DIV/0!				#DIV/0!
		0	0	#DIV/0!	0	0	#DIV/0!		0	0	#DIV/0!				#DIV/0!				#DIV/0!				#DIV/0!				#DIV/0!				#DIV/0!				#DIV/0!				#DIV/0!				#DIV/0!				#DIV/0!
		0	0	#DIV/0!	0	0	#DIV/0!		0	0	#DIV/0!				#DIV/0!				#DIV/0!				#DIV/0!				#DIV/0!				#DIV/0!				#DIV/0!				#DIV/0!				#DIV/0!				#DIV/0!
		0	0	#DIV/0!	0	0	#DIV/0!		0	0	#DIV/0!				#DIV/0!				#DIV/0!				#DIV/0!				#DIV/0!				#DIV/0!				#DIV/0!				#DIV/0!				#DIV/0!				#DIV/0!
		0	0	#DIV/0!	0	0	#DIV/0!		0	0	#DIV/0!				#DIV/0!				#DIV/0!				#DIV/0!				#DIV/0!				#DIV/0!				#DIV/0!				#DIV/0!				#DIV/0!				#DIV/0!
		0	0	#DIV/0!	0	0	#DIV/0!		0	0	#DIV/0!				#DIV/0!				#DIV/0!				#DIV/0!				#DIV/0!				#DIV/0!				#DIV/0!				#DIV/0!				#DIV/0!				#DIV/0!
		0	0	#DIV/0!	0	0	#DIV/0!		0	0	#DIV/0!				#DIV/0!				#DIV/0!				#DIV/0!				#DIV/0!				#DIV/0!				#DIV/0!				#DIV/0!				#DIV/0!				#DIV/0!
		0	0	#DIV/0!	0	0	#DIV/0!		0	0	#DIV/0!				#DIV/0!				#DIV/0!				#DIV/0!				#DIV/0!				#DIV/0!				#DIV/0!				#DIV/0!				#DIV/0!				#DIV/0!
		0	0	#DIV/0!	0	0	#DIV/0!		0	0	#DIV/0!				#DIV/0!				#DIV/0!				#DIV/0!				#DIV/0!				#DIV/0!				#DIV/0!				#DIV/0!				#DIV/0!				#DIV/0!
		0	0	#DIV/0!	0	0	#DIV/0!		0	0	#DIV/0!				#DIV/0!				#DIV/0!				#DIV/0!				#DIV/0!				#DIV/0!				#DIV/0!				#DIV/0!				#DIV/0!				#DIV/0!
		0	0	#DIV/0!	0	0	#DIV/0!		0	0	#DIV/0!				#DIV/0!				#DIV/0!				#DIV/0!				#DIV/0!				#DIV/0!				#DIV/0!				#DIV/0!				#DIV/0!				#DIV/0!
		0	0	#DIV/0!	0	0	#DIV/0!		0	0	#DIV/0!				#DIV/0!				#DIV/0!				#DIV/0!				#DIV/0!				#DIV/0!				#DIV/0!				#DIV/0!				#DIV/0!				#DIV/0!
		0	0	#DIV/0!	0	0	#DIV/0!		0	0	#DIV/0!				#DIV/0!				#DIV/0!				#DIV/0!				#DIV/0!				#DIV/0!				#DIV/0!				#DIV/0!				#DIV/0!				#DIV/0!
		0	0	#DIV/0!	0	0	#DIV/0!		0	0	#DIV/0!				#DIV/0!				#DIV/0!				#DIV/0!				#DIV/0!				#DIV/0!				#DIV/0!				#DIV/0!				#DIV/0!				#DIV/0!
		0	0	#DIV/0!	0	0	#DIV/0!		0	0	#DIV/0!				#DIV/0!				#DIV/0!				#DIV/0!				#DIV/0!				#DIV/0!				#DIV/0!				#DIV/0!				#DIV/0!				#DIV/0!
		0	0	#DIV/0!	0	0	#DIV/0!		0	0	#DIV/0!				#DIV/0!				#DIV/0!				#DIV/0!				#DIV/0!				#DIV/0!				#DIV/0!				#DIV/0!				#DIV/0!				#DIV/0!
		0	0	#DIV/0!	0	0	#DIV/0!		0	0	#DIV/0!				#DIV/0!				#DIV/0!				#DIV/0!				#DIV/0!				#DIV/0!				#DIV/0!				#DIV/0!				#DIV/0!				#DIV/0!
		0	0	#DIV/0!	0	0	#DIV/0!		0	0	#DIV/0!				#DIV/0!				#DIV/0!				#DIV/0!				#DIV/0!				#DIV/0!				#DIV/0!				#DIV/0!				#DIV/0!				#DIV/0!
		0	0	#DIV/0!	0	0	#DIV/0!		0	0	#DIV/0!				#DIV/0!				#DIV/0!				#DIV/0!				#DIV/0!				#DIV/0!				#DIV/0!				#DIV/0!				#DIV/0!				#DIV/0!
		0	0	#DIV/0!	0	0	#DIV/0!		0	0	#DIV/0!				#DIV/0!				#DIV/0!				#DIV/0!				#DIV/0!				#DIV/0!				#DIV/0!				#DIV/0!				#DIV/0!				#DIV/0!
		0	0	#DIV/0!	0	0	#DIV/0!		0	0	#DIV/0!				#DIV/0!				#DIV/0!				#DIV/0!				#DIV/0!				#DIV/0!				#DIV/0!				#DIV/0!				#DIV/0!				#DIV/0!
		0	0	#DIV/0!	0	0	#DIV/0!		0	0	#DIV/0!				#DIV/0!				#DIV/0!				#DIV/0!				#DIV/0!				#DIV/0!				#DIV/0!				#DIV/0!				#DIV/0!				#DIV/0!
		0	0	#DIV/0!	0	0	#DIV/0!		0	0	#DIV/0!				#DIV/0!				#DIV/0!				#DIV/0!				#DIV/0!				#DIV/0!				#DIV/0!				#DIV/0!				#DIV/0!				#DIV/0!
		0	0	#DIV/0!	0	0	#DIV/0!		0	0	#DIV/0!				#DIV/0!				#DIV/0!				#DIV/0!				#DIV/0!				#DIV/0!				#DIV/0!				#DIV/0!				#DIV/0!				#DIV/0!
		0	0	#DIV/0!	0	0	#DIV/0!		0	0	#DIV/0!				#DIV/0!				#DIV/0!				#DIV/0!				#DIV/0!				#DIV/0!				#DIV/0!				#DIV/0!				#DIV/0!				#DIV/0!
		0	0	#DIV/0!	0	0	#DIV/0!		0	0	#DIV/0!				#DIV/0!				#DIV/0!				#DIV/0!				#DIV/0!				#DIV/0!				#DIV/0!				#DIV/0!				#DIV/0!				#DIV/0!
		0	0	#DIV/0!	0	0	#DIV/0!		0	0	#DIV/0!				#DIV/0!				#DIV/0!				#DIV/0!				#DIV/0!				#DIV/0!				#DIV/0!				#DIV/0!				#DIV/0!				#DIV/0!
		0	0	#DIV/0!	0	0	#DIV/0!		0	0	#DIV/0!				#DIV/0!				#DIV/0!				#DIV/0!				#DIV/0!				#DIV/0!				#DIV/0!				#DIV/0!				#DIV/0!				#DIV/0!
		0	0	#DIV/0!	0	0	#DIV/0!		0	0	#DIV/0!				#DIV/0!				#DIV/0!				#DIV/0!				#DIV/0!				#DIV/0!				#DIV/0!				#DIV/0!				#DIV/0!				#DIV/0!
		0	0	#DIV/0!	0	0	#DIV/0!		0	0	#DIV/0!				#DIV/0!				#DIV/0!				#DIV/0!				#DIV/0!				#DIV/0!				#DIV/0!				#DIV/0!				#DIV/0!				#DIV/0!
		0	0	#DIV/0!	0	0	#DIV/0!		0	0	#DIV/0!				#DIV/0!				#DIV/0!				#DIV/0!				#DIV/0!				#DIV/0!				#DIV/0!				#DIV/0!				#DIV/0!				#DIV/0!
		0	0	#DIV/0!	0	0	#DIV/0!		0	0	#DIV/0!				#DIV/0!				#DIV/0!				#DIV/0!				#DIV/0!				#DIV/0!				#DIV/0!				#DIV/0!				#DIV/0!				#DIV/0!
		0	0	#DIV/0!	0	0	#DIV/0!		0	0	#DIV/0!				#DIV/0!				#DIV/0!				#DIV/0!				#DIV/0!				#DIV/0!				#DIV/0!				#DIV/0!				#DIV/0!				#DIV/0!
		0	0	#DIV/0!	0	0	#DIV/0!		0	0	#DIV/0!				#DIV/0!				#DIV/0!				#DIV/0!				#DIV/0!				#DIV/0!				#DIV/0!				#DIV/0!				#DIV/0!				#DIV/0!
		0	0	#DIV/0!	0	0	#DIV/0!		0	0	#DIV/0!				#DIV/0!				#DIV/0!				#DIV/0!				#DIV/0!				#DIV/0!				#DIV/0!				#DIV/0!				#DIV/0!				#DIV/0!
		0	0	#DIV/0!	0	0	#DIV/0!		0	0	#DIV/0!				#DIV/0!				#DIV/0!				#DIV/0!				#DIV/0!				#DIV/0!				#DIV/0!				#DIV/0!				#DIV/0!				#DIV/0!
		0	0	#DIV/0!	0	0	#DIV/0!		0	0	#DIV/0!				#DIV/0!				#DIV/0!				#DIV/0!				#DIV/0!				#DIV/0!				#DIV/0!				#DIV/0!				#DIV/0!				#DIV/0!
		0	0	#DIV/0!	0	0	#DIV/0!		0	0	#DIV/0!				#DIV/0!				#DIV/0!				#DIV/0!				#DIV/0!				#DIV/0!				#DIV/0!				#DIV/0!				#DIV/0!				#DIV/0!
		0	0	#DIV/0!	0	0	#DIV/0!		0	0	#DIV/0!				#DIV/0!				#DIV/0!				#DIV/0!				#DIV/0!				#DIV/0!				#DIV/0!				#DIV/0!				#DIV/0!				#DIV/0!
		0	0	#DIV/0!	0	0	#DIV/0!		0	0	#DIV/0!				#DIV/0!				#DIV/0!				#DIV/0!				#DIV/0!				#DIV/0!				#DIV/0!				#DIV/0!				#DIV/0!				#DIV/0!
		0	0	#DIV/0!	0	0	#DIV/0!		0	0	#DIV/0!				#DIV/0!				#DIV/0!				#DIV/0!				#DIV/0!				#DIV/0!				#DIV/0!				#DIV/0!				#DIV/0!				#DIV/0!
		0	0	#DIV/0!	0	0	#DIV/0!		0	0	#DIV/0!				#DIV/0!				#DIV/0!				#DIV/0!				#DIV/0!				#DIV/0!				#DIV/0!				#DIV/0!				#DIV/0!				#DIV/0!
		0	0	#DIV/0!	0	0	#DIV/0!		0	0	#DIV/0!				#DIV/0!				#DIV/0!				#DIV/0!				#DIV/0!				#DIV/0!				#DIV/0!				#DIV/0!				#DIV/0!				#DIV/0!
		0	0	#DIV/0!	0	0	#DIV/0!		0	0	#DIV/0!				#DIV/0!				#DIV/0!				#DIV/0!				#DIV/0!				#DIV/0!				#DIV/0!				#DIV/0!				#DIV/0!				#DIV/0!
		0	0	#DIV/0!	0	0	#DIV/0!		0	0	#DIV/0!				#DIV/0!				#DIV/0!				#DIV/0!				#DIV/0!				#DIV/0!				#DIV/0!				#DIV/0!				#DIV/0!				#DIV/0!
		0	0	#DIV/0!	0	0	#DIV/0!		0	0	#DIV/0!				#DIV/0!				#DIV/0!				#DIV/0!				#DIV/0!				#DIV/0!				#DIV/0!				#DIV/0!				#DIV/0!				#DIV/0!
		0	0	#DIV/0!	0	0	#DIV/0!		0	0	#DIV/0!				#DIV/0!				#DIV/0!				#DIV/0!				#DIV/0!				#DIV/0!				#DIV/0!				#DIV/0!				#DIV/0!				#DIV/0!
		0	0	#DIV/0!	0	0	#DIV/0!		0	0	#DIV/0!				#DIV/0!				#DIV/0!				#DIV/0!				#DIV/0!				#DIV/0!				#DIV/0!				#DIV/0!				#DIV/0!				#DIV/0!
		0	0	#DIV/0!	0	0	#DIV/0!		0	0	#DIV/0!				#DIV/0!				#DIV/0!				#DIV/0!				#DIV/0!				#DIV/0!				#DIV/0!				#DIV/0!				#DIV/0!				#DIV/0!
		0	0	#DIV/0!	0	0	#DIV/0!		0	0	#DIV/0!				#DIV/0!				#DIV/0!				#DIV/0!				#DIV/0!				#DIV/0!				#DIV/0!				#DIV/0!				#DIV/0!				#DIV/0!
		0	0	#DIV/0!	0	0	#DIV/0!		0	0	#DIV/0!				#DIV/0!				#DIV/0!				#DIV/0!				#DIV/0!				#DIV/0!				#DIV/0!				#DIV/0!				#DIV/0!				#DIV/0!
		0	0	#DIV/0!	0	0	#DIV/0!		0	0	#DIV/0!				#DIV/0!				#DIV/0!				#DIV/0!				#DIV/0!				#DIV/0!				#DIV/0!				#DIV/0!				#DIV/0!				#DIV/0!
		0	0	#DIV/0!	0	0	#DIV/0!		0	0	#DIV/0!				#DIV/0!				#DIV/0!				#DIV/0!				#DIV/0!				#DIV/0!				#DIV/0!				#DIV/0!				#DIV/0!				#DIV/0!
		0	0	#DIV/0!	0	0	#DIV/0!		0	0	#DIV/0!				#DIV/0!				#DIV/0!				#DIV/0!				#DIV/0!				#DIV/0!				#DIV/0!				#DIV/0!				#DIV/0!				#DIV/0!
		0	0	#DIV/0!	0	0	#DIV/0!		0	0	#DIV/0!				#DIV/0!				#DIV/0!				#DIV/0!				#DIV/0!				#DIV/0!				#DIV/0!				#DIV/0!				#DIV/0!				#DIV/0!
		0	0	#DIV/0!	0	0	#DIV/0!		0	0	#DIV/0!				#DIV/0!				#DIV/0!				#DIV/0!				#DIV/0!				#DIV/0!				#DIV/0!				#DIV/0!				#DIV/0!				#DIV/0!
		0	0	#DIV/0!	0	0	#DIV/0!		0	0	#DIV/0!				#DIV/0!				#DIV/0!				#DIV/0!				#DIV/0!				#DIV/0!				#DIV/0!				#DIV/0!				#DIV/0!				#DIV/0!
		0	0	#DIV/0!	0	0	#DIV/0!		0	0	#DIV/0!				#DIV/0!				#DIV/0!				#DIV/0!				#DIV/0!				#DIV/0!				#DIV/0!				#DIV/0!				#DIV/0!				#DIV/0!
		0	0	#DIV/0!	0	0	#DIV/0!		0	0	#DIV/0!				#DIV/0!				#DIV/0!				#DIV/0!				#DIV/0!				#DIV/0!				#DIV/0!				#DIV/0!				#DIV/0!				#DIV/0!
		0	0	#DIV/0!	0	0	#DIV/0!		0	0	#DIV/0!				#DIV/0!				#DIV/0!				#DIV/0!				#DIV/0!				#DIV/0!				#DIV/0!				#DIV/0!				#DIV/0!				#DIV/0!
		0	0	#DIV/0!	0	0	#DIV/0!		0	0	#DIV/0!				#DIV/0!				#DIV/0!				#DIV/0!				#DIV/0!				#DIV/0!				#DIV/0!				#DIV/0!				#DIV/0!				#DIV/0!
		0	0	#DIV/0!	0	0	#DIV/0!		0	0	#DIV/0!				#DIV/0!				#DIV/0!				#DIV/0!				#DIV/0!				#DIV/0!				#DIV/0!				#DIV/0!				#DIV/0!				#DIV/0!
		0	0	#DIV/0!	0	0	#DIV/0!		0	0	#DIV/0!				#DIV/0!				#DIV/0!				#DIV/0!				#DIV/0!				#DIV/0!				#DIV/0!				#DIV/0!				#DIV/0!				#DIV/0!
		0	0	#DIV/0!	0	0	#DIV/0!		0	0	#DIV/0!				#DIV/0!				#DIV/0!				#DIV/0!				#DIV/0!				#DIV/0!				#DIV/0!				#DIV/0!				#DIV/0!				#DIV/0!
		0	0	#DIV/0!	0	0	#DIV/0!		0	0	#DIV/0!				#DIV/0!				#DIV/0!				#DIV/0!				#DIV/0!				#DIV/0!				#DIV/0!				#DIV/0!				#DIV/0!				#DIV/0!
		0	0	#DIV/0!	0	0	#DIV/0!		0	0	#DIV/0!				#DIV/0!				#DIV/0!				#DIV/0!				#DIV/0!				#DIV/0!				#DIV/0!				#DIV/0!				#DIV/0!				#DIV/0!
		0	0	#DIV/0!	0	0	#DIV/0!		0	0	#DIV/0!				#DIV/0!				#DIV/0!				#DIV/0!				#DIV/0!				#DIV/0!				#DIV/0!				#DIV/0!				#DIV/0!				#DIV/0!
		0	0	#DIV/0!	0	0	#DIV/0!		0	0	#DIV/0!				#DIV/0!				#DIV/0!				#DIV/0!				#DIV/0!				#DIV/0!				#DIV/0!				#DIV/0!				#DIV/0!				#DIV/0!
		0	0	#DIV/0!	0	0	#DIV/0!		0	0	#DIV/0!				#DIV/0!				#DIV/0!				#DIV/0!				#DIV/0!				#DIV/0!				#DIV/0!				#DIV/0!				#DIV/0!				#DIV/0!
		0	0	#DIV/0!	0	0	#DIV/0!		0	0	#DIV/0!				#DIV/0!				#DIV/0!				#DIV/0!				#DIV/0!				#DIV/0!				#DIV/0!				#DIV/0!				#DIV/0!				#DIV/0!
		0	0	#DIV/0!	0	0	#DIV/0!		0	0	#DIV/0!				#DIV/0!				#DIV/0!				#DIV/0!				#DIV/0!				#DIV/0!				#DIV/0!				#DIV/0!				#DIV/0!				#DIV/0!
		0	0	#DIV/0!	0	0	#DIV/0!		0	0	#DIV/0!				#DIV/0!				#DIV/0!				#DIV/0!				#DIV/0!				#DIV/0!				#DIV/0!				#DIV/0!				#DIV/0!				#DIV/0!
		0	0	#DIV/0!	0	0	#DIV/0!		0	0	#DIV/0!				#DIV/0!				#DIV/0!				#DIV/0!				#DIV/0!				#DIV/0!				#DIV/0!				#DIV/0!				#DIV/0!				#DIV/0!
		0	0	#DIV/0!	0	0	#DIV/0!		0	0	#DIV/0!				#DIV/0!				#DIV/0!				#DIV/0!				#DIV/0!				#DIV/0!				#DIV/0!				#DIV/0!				#DIV/0!				#DIV/0!
		0	0	#DIV/0!	0	0	#DIV/0!		0	0	#DIV/0!				#DIV/0!				#DIV/0!				#DIV/0!				#DIV/0!				#DIV/0!				#DIV/0!				#DIV/0!				#DIV/0!				#DIV/0!
		0	0	#DIV/0!	0	0	#DIV/0!		0	0	#DIV/0!				#DIV/0!				#DIV/0!				#DIV/0!				#DIV/0!				#DIV/0!				#DIV/0!				#DIV/0!				#DIV/0!				#DIV/0!
		0	0	#DIV/0!	0	0	#DIV/0!		0	0	#DIV/0!				#DIV/0!				#DIV/0!				#DIV/0!				#DIV/0!				#DIV/0!				#DIV/0!				#DIV/0!				#DIV/0!				#DIV/0!
		0	0	#DIV/0!	0	0	#DIV/0!		0	0	#DIV/0!				#DIV/0!				#DIV/0!				#DIV/0!				#DIV/0!				#DIV/0!				#DIV/0!				#DIV/0!				#DIV/0!				#DIV/0!
		0	0	#DIV/0!	0	0	#DIV/0!		0	0	#DIV/0!				#DIV/0!				#DIV/0!				#DIV/0!				#DIV/0!				#DIV/0!				#DIV/0!				#DIV/0!				#DIV/0!				#DIV/0!
		0	0	#DIV/0!	0	0	#DIV/0!		0	0	#DIV/0!				#DIV/0!				#DIV/0!				#DIV/0!				#DIV/0!				#DIV/0!				#DIV/0!				#DIV/0!				#DIV/0!				#DIV/0!
		0	0	#DIV/0!	0	0	#DIV/0!		0	0	#DIV/0!				#DIV/0!				#DIV/0!				#DIV/0!				#DIV/0!				#DIV/0!				#DIV/0!				#DIV/0!				#DIV/0!				#DIV/0!
		0	0	#DIV/0!	0	0	#DIV/0!		0	0	#DIV/0!				#DIV/0!				#DIV/0!				#DIV/0!				#DIV/0!				#DIV/0!				#DIV/0!				#DIV/0!				#DIV/0!				#DIV/0!
		0	0	#DIV/0!	0	0	#DIV/0!		0	0	#DIV/0!				#DIV/0!				#DIV/0!				#DIV/0!				#DIV/0!				#DIV/0!				#DIV/0!				#DIV/0!				#DIV/0!				#DIV/0!
		0	0	#DIV/0!	0	0	#DIV/0!		0	0	#DIV/0!				#DIV/0!				#DIV/0!				#DIV/0!				#DIV/0!				#DIV/0!				#DIV/0!				#DIV/0!				#DIV/0!				#DIV/0!
		0	0	#DIV/0!	0	0	#DIV/0!		0	0	#DIV/0!				#DIV/0!				#DIV/0!				#DIV/0!				#DIV/0!				#DIV/0!				#DIV/0!				#DIV/0!				#DIV/0!				#DIV/0!
		0	0	#DIV/0!	0	0	#DIV/0!		0	0	#DIV/0!				#DIV/0!				#DIV/0!				#DIV/0!				#DIV/0!				#DIV/0!				#DIV/0!				#DIV/0!				#DIV/0!				#DIV/0!
		0	0	#DIV/0!	0	0	#DIV/0!		0	0	#DIV/0!				#DIV/0!				#DIV/0!				#DIV/0!				#DIV/0!				#DIV/0!				#DIV/0!				#DIV/0!				#DIV/0!				#DIV/0!
		0	0	#DIV/0!	0	0	#DIV/0!		0	0	#DIV/0!				#DIV/0!				#DIV/0!				#DIV/0!				#DIV/0!				#DIV/0!				#DIV/0!				#DIV/0!				#DIV/0!				#DIV/0!
		0	0	#DIV/0!	0	0	#DIV/0!		0	0	#DIV/0!				#DIV/0!				#DIV/0!				#DIV/0!				#DIV/0!				#DIV/0!				#DIV/0!				#DIV/0!				#DIV/0!				#DIV/0!
		0	0	#DIV/0!	0	0	#DIV/0!		0	0	#DIV/0!				#DIV/0!				#DIV/0!				#DIV/0!				#DIV/0!				#DIV/0!				#DIV/0!				#DIV/0!				#DIV/0!				#DIV/0!
		0	0	#DIV/0!	0	0	#DIV/0!		0	0	#DIV/0!				#DIV/0!				#DIV/0!				#DIV/0!				#DIV/0!				#DIV/0!				#DIV/0!				#DIV/0!				#DIV/0!				#DIV/0!
		0	0	#DIV/0!	0	0	#DIV/0!		0	0	#DIV/0!				#DIV/0!				#DIV/0!				#DIV/0!				#DIV/0!				#DIV/0!				#DIV/0!				#DIV/0!				#DIV/0!				#DIV/0!
		0	0	#DIV/0!	0	0	#DIV/0!		0	0	#DIV/0!				#DIV/0!				#DIV/0!				#DIV/0!				#DIV/0!				#DIV/0!				#DIV/0!				#DIV/0!				#DIV/0!				#DIV/0!
		0	0	#DIV/0!	0	0	#DIV/0!		0	0	#DIV/0!				#DIV/0!				#DIV/0!				#DIV/0!				#DIV/0!				#DIV/0!				#DIV/0!				#DIV/0!				#DIV/0!				#DIV/0!
		0	0	#DIV/0!	0	0	#DIV/0!		0	0	#DIV/0!				#DIV/0!				#DIV/0!				#DIV/0!				#DIV/0!				#DIV/0!				#DIV/0!				#DIV/0!				#DIV/0!				#DIV/0!
		0	0	#DIV/0!	0	0	#DIV/0!		0	0	#DIV/0!				#DIV/0!				#DIV/0!				#DIV/0!				#DIV/0!				#DIV/0!				#DIV/0!				#DIV/0!				#DIV/0!				#DIV/0!
		0	0	#DIV/0!	0	0	#DIV/0!		0	0	#DIV/0!				#DIV/0!				#DIV/0!				#DIV/0!				#DIV/0!				#DIV/0!				#DIV/0!				#DIV/0!				#DIV/0!				#DIV/0!
		0	0	#DIV/0!	0	0	#DIV/0!		0	0	#DIV/0!				#DIV/0!				#DIV/0!				#DIV/0!				#DIV/0!				#DIV/0!				#DIV/0!				#DIV/0!				#DIV/0!				#DIV/0!
		0	0	#DIV/0!	0	0	#DIV/0!		0	0	#DIV/0!				#DIV/0!				#DIV/0!				#DIV/0!				#DIV/0!				#DIV/0!				#DIV/0!				#DIV/0!				#DIV/0!				#DIV/0!
		0	0	#DIV/0!	0	0	#DIV/0!		0	0	#DIV/0!				#DIV/0!				#DIV/0!				#DIV/0!				#DIV/0!				#DIV/0!				#DIV/0!				#DIV/0!				#DIV/0!				#DIV/0!
		0	0	#DIV/0!	0	0	#DIV/0!		0	0	#DIV/0!				#DIV/0!				#DIV/0!				#DIV/0!				#DIV/0!				#DIV/0!				#DIV/0!				#DIV/0!				#DIV/0!				#DIV/0!
		0	0	#DIV/0!	0	0	#DIV/0!		0	0	#DIV/0!				#DIV/0!				#DIV/0!				#DIV/0!				#DIV/0!				#DIV/0!				#DIV/0!				#DIV/0!				#DIV/0!				#DIV/0!
		0	0	#DIV/0!	0	0	#DIV/0!		0	0	#DIV/0!				#DIV/0!				#DIV/0!				#DIV/0!				#DIV/0!				#DIV/0!				#DIV/0!				#DIV/0!				#DIV/0!				#DIV/0!
		0	0	#DIV/0!	0	0	#DIV/0!		0	0	#DIV/0!				#DIV/0!				#DIV/0!				#DIV/0!				#DIV/0!				#DIV/0!				#DIV/0!				#DIV/0!				#DIV/0!				#DIV/0!
		0	0	#DIV/0!	0	0	#DIV/0!		0	0	#DIV/0!				#DIV/0!				#DIV/0!				#DIV/0!				#DIV/0!				#DIV/0!				#DIV/0!				#DIV/0!				#DIV/0!				#DIV/0!
		0	0	#DIV/0!	0	0	#DIV/0!		0	0	#DIV/0!				#DIV/0!				#DIV/0!				#DIV/0!				#DIV/0!				#DIV/0!				#DIV/0!				#DIV/0!				#DIV/0!				#DIV/0!
		0	0	#DIV/0!	0	0	#DIV/0!		0	0	#DIV/0!				#DIV/0!				#DIV/0!				#DIV/0!				#DIV/0!				#DIV/0!				#DIV/0!				#DIV/0!				#DIV/0!				#DIV/0!
		0	0	#DIV/0!	0	0	#DIV/0!		0	0	#DIV/0!				#DIV/0!				#DIV/0!				#DIV/0!				#DIV/0!				#DIV/0!				#DIV/0!				#DIV/0!				#DIV/0!				#DIV/0!
		0	0	#DIV/0!	0	0	#DIV/0!		0	0	#DIV/0!				#DIV/0!				#DIV/0!				#DIV/0!				#DIV/0!				#DIV/0!				#DIV/0!				#DIV/0!				#DIV/0!				#DIV/0!
		0	0	#DIV/0!	0	0	#DIV/0!		0	0	#DIV/0!				#DIV/0!				#DIV/0!				#DIV/0!				#DIV/0!				#DIV/0!				#DIV/0!				#DIV/0!				#DIV/0!				#DIV/0!
		0	0	#DIV/0!	0	0	#DIV/0!		0	0	#DIV/0!				#DIV/0!				#DIV/0!				#DIV/0!				#DIV/0!				#DIV/0!				#DIV/0!				#DIV/0!				#DIV/0!				#DIV/0!
		0	0	#DIV/0!	0	0	#DIV/0!		0	0	#DIV/0!				#DIV/0!				#DIV/0!				#DIV/0!				#DIV/0!				#DIV/0!				#DIV/0!				#DIV/0!				#DIV/0!				#DIV/0!
		0	0	#DIV/0!	0	0	#DIV/0!		0	0	#DIV/0!				#DIV/0!				#DIV/0!				#DIV/0!				#DIV/0!				#DIV/0!				#DIV/0!				#DIV/0!				#DIV/0!				#DIV/0!
		0	0	#DIV/0!	0	0	#DIV/0!		0	0	#DIV/0!				#DIV/0!				#DIV/0!				#DIV/0!				#DIV/0!				#DIV/0!				#DIV/0!				#DIV/0!				#DIV/0!				#DIV/0!
		0	0	#DIV/0!	0	0	#DIV/0!		0	0	#DIV/0!				#DIV/0!				#DIV/0!				#DIV/0!				#DIV/0!				#DIV/0!				#DIV/0!				#DIV/0!				#DIV/0!				#DIV/0!
		0	0	#DIV/0!	0	0	#DIV/0!		0	0	#DIV/0!				#DIV/0!				#DIV/0!				#DIV/0!				#DIV/0!				#DIV/0!				#DIV/0!				#DIV/0!				#DIV/0!				#DIV/0!
		0	0	#DIV/0!	0	0	#DIV/0!		0	0	#DIV/0!				#DIV/0!				#DIV/0!				#DIV/0!				#DIV/0!				#DIV/0!				#DIV/0!				#DIV/0!				#DIV/0!				#DIV/0!
		0	0	#DIV/0!	0	0	#DIV/0!		0	0	#DIV/0!				#DIV/0!				#DIV/0!				#DIV/0!				#DIV/0!				#DIV/0!				#DIV/0!				#DIV/0!				#DIV/0!				#DIV/0!
		0	0	#DIV/0!	0	0	#DIV/0!		0	0	#DIV/0!				#DIV/0!				#DIV/0!				#DIV/0!				#DIV/0!				#DIV/0!				#DIV/0!				#DIV/0!				#DIV/0!				#DIV/0!
		0	0	#DIV/0!	0	0	#DIV/0!		0	0	#DIV/0!				#DIV/0!				#DIV/0!				#DIV/0!				#DIV/0!				#DIV/0!				#DIV/0!				#DIV/0!				#DIV/0!				#DIV/0!
		0	0	#DIV/0!	0	0	#DIV/0!		0	0	#DIV/0!				#DIV/0!				#DIV/0!				#DIV/0!				#DIV/0!				#DIV/0!				#DIV/0!				#DIV/0!				#DIV/0!				#DIV/0!
		0	0	#DIV/0!	0	0	#DIV/0!		0	0	#DIV/0!				#DIV/0!				#DIV/0!				#DIV/0!				#DIV/0!				#DIV/0!				#DIV/0!				#DIV/0!				#DIV/0!				#DIV/0!
		0	0	#DIV/0!	0	0	#DIV/0!		0	0	#DIV/0!				#DIV/0!				#DIV/0!				#DIV/0!				#DIV/0!				#DIV/0!				#DIV/0!				#DIV/0!				#DIV/0!				#DIV/0!
		0	0	#DIV/0!	0	0	#DIV/0!		0	0	#DIV/0!				#DIV/0!				#DIV/0!				#DIV/0!				#DIV/0!				#DIV/0!				#DIV/0!				#DIV/0!				#DIV/0!				#DIV/0!
		0	0	#DIV/0!	0	0	#DIV/0!		0	0	#DIV/0!				#DIV/0!				#DIV/0!				#DIV/0!				#DIV/0!				#DIV/0!				#DIV/0!				#DIV/0!				#DIV/0!				#DIV/0!
		0	0	#DIV/0!	0	0	#DIV/0!		0	0	#DIV/0!				#DIV/0!				#DIV/0!				#DIV/0!				#DIV/0!				#DIV/0!				#DIV/0!				#DIV/0!				#DIV/0!				#DIV/0!
		0	0	#DIV/0!	0	0	#DIV/0!		0	0	#DIV/0!				#DIV/0!				#DIV/0!				#DIV/0!				#DIV/0!				#DIV/0!				#DIV/0!				#DIV/0!				#DIV/0!				#DIV/0!
		0	0	#DIV/0!	0	0	#DIV/0!		0	0	#DIV/0!				#DIV/0!				#DIV/0!				#DIV/0!				#DIV/0!				#DIV/0!				#DIV/0!				#DIV/0!				#DIV/0!				#DIV/0!
		0	0	#DIV/0!	0	0	#DIV/0!		0	0	#DIV/0!				#DIV/0!				#DIV/0!				#DIV/0!				#DIV/0!				#DIV/0!				#DIV/0!				#DIV/0!				#DIV/0!				#DIV/0!
		0	0	#DIV/0!	0	0	#DIV/0!		0	0	#DIV/0!				#DIV/0!				#DIV/0!				#DIV/0!				#DIV/0!				#DIV/0!				#DIV/0!				#DIV/0!				#DIV/0!				#DIV/0!
		0	0	#DIV/0!	0	0	#DIV/0!		0	0	#DIV/0!				#DIV/0!				#DIV/0!				#DIV/0!				#DIV/0!				#DIV/0!				#DIV/0!				#DIV/0!				#DIV/0!				#DIV/0!
		0	0	#DIV/0!	0	0	#DIV/0!		0	0	#DIV/0!				#DIV/0!				#DIV/0!				#DIV/0!				#DIV/0!				#DIV/0!				#DIV/0!				#DIV/0!				#DIV/0!				#DIV/0!
		0	0	#DIV/0!	0	0	#DIV/0!		0	0	#DIV/0!				#DIV/0!				#DIV/0!				#DIV/0!				#DIV/0!				#DIV/0!				#DIV/0!				#DIV/0!				#DIV/0!				#DIV/0!
		0	0	#DIV/0!	0	0	#DIV/0!		0	0	#DIV/0!				#DIV/0!				#DIV/0!				#DIV/0!				#DIV/0!				#DIV/0!				#DIV/0!				#DIV/0!				#DIV/0!				#DIV/0!
		0	0	#DIV/0!	0	0	#DIV/0!		0	0	#DIV/0!				#DIV/0!				#DIV/0!				#DIV/0!				#DIV/0!				#DIV/0!				#DIV/0!				#DIV/0!				#DIV/0!				#DIV/0!
		0	0	#DIV/0!	0	0	#DIV/0!		0	0	#DIV/0!				#DIV/0!				#DIV/0!				#DIV/0!				#DIV/0!				#DIV/0!				#DIV/0!				#DIV/0!				#DIV/0!				#DIV/0!
		0	0	#DIV/0!	0	0	#DIV/0!		0	0	#DIV/0!				#DIV/0!				#DIV/0!				#DIV/0!				#DIV/0!				#DIV/0!				#DIV/0!				#DIV/0!				#DIV/0!				#DIV/0!
		0	0	#DIV/0!	0	0	#DIV/0!		0	0	#DIV/0!				#DIV/0!				#DIV/0!				#DIV/0!				#DIV/0!				#DIV/0!				#DIV/0!				#DIV/0!				#DIV/0!				#DIV/0!
		0	0	#DIV/0!	0	0	#DIV/0!		0	0	#DIV/0!				#DIV/0!				#DIV/0!				#DIV/0!				#DIV/0!				#DIV/0!				#DIV/0!				#DIV/0!				#DIV/0!				#DIV/0!
		0	0	#DIV/0!	0	0	#DIV/0!		0	0	#DIV/0!				#DIV/0!				#DIV/0!				#DIV/0!				#DIV/0!				#DIV/0!				#DIV/0!				#DIV/0!				#DIV/0!				#DIV/0!
		0	0	#DIV/0!	0	0	#DIV/0!		0	0	#DIV/0!				#DIV/0!				#DIV/0!				#DIV/0!				#DIV/0!				#DIV/0!				#DIV/0!				#DIV/0!				#DIV/0!				#DIV/0!
		0	0	#DIV/0!	0	0	#DIV/0!		0	0	#DIV/0!				#DIV/0!				#DIV/0!				#DIV/0!				#DIV/0!				#DIV/0!				#DIV/0!				#DIV/0!				#DIV/0!				#DIV/0!
		0	0	#DIV/0!	0	0	#DIV/0!		0	0	#DIV/0!				#DIV/0!				#DIV/0!				#DIV/0!				#DIV/0!				#DIV/0!				#DIV/0!				#DIV/0!				#DIV/0!				#DIV/0!
		0	0	#DIV/0!	0	0	#DIV/0!		0	0	#DIV/0!				#DIV/0!				#DIV/0!				#DIV/0!				#DIV/0!				#DIV/0!				#DIV/0!				#DIV/0!				#DIV/0!				#DIV/0!
		0	0	#DIV/0!	0	0	#DIV/0!		0	0	#DIV/0!				#DIV/0!				#DIV/0!				#DIV/0!				#DIV/0!				#DIV/0!				#DIV/0!				#DIV/0!				#DIV/0!				#DIV/0!
		0	0	#DIV/0!	0	0	#DIV/0!		0	0	#DIV/0!				#DIV/0!				#DIV/0!				#DIV/0!				#DIV/0!				#DIV/0!				#DIV/0!				#DIV/0!				#DIV/0!				#DIV/0!
		0	0	#DIV/0!	0	0	#DIV/0!		0	0	#DIV/0!				#DIV/0!				#DIV/0!				#DIV/0!				#DIV/0!				#DIV/0!				#DIV/0!				#DIV/0!				#DIV/0!				#DIV/0!
		0	0	#DIV/0!	0	0	#DIV/0!		0	0	#DIV/0!				#DIV/0!				#DIV/0!				#DIV/0!				#DIV/0!				#DIV/0!				#DIV/0!				#DIV/0!				#DIV/0!				#DIV/0!
		0	0	#DIV/0!	0	0	#DIV/0!		0	0	#DIV/0!				#DIV/0!				#DIV/0!				#DIV/0!				#DIV/0!				#DIV/0!				#DIV/0!				#DIV/0!				#DIV/0!				#DIV/0!
		0	0	#DIV/0!	0	0	#DIV/0!		0	0	#DIV/0!				#DIV/0!				#DIV/0!				#DIV/0!				#DIV/0!				#DIV/0!				#DIV/0!				#DIV/0!				#DIV/0!				#DIV/0!
		0	0	#DIV/0!	0	0	#DIV/0!		0	0	#DIV/0!				#DIV/0!				#DIV/0!				#DIV/0!				#DIV/0!				#DIV/0!				#DIV/0!				#DIV/0!				#DIV/0!				#DIV/0!
		0	0	#DIV/0!	0	0	#DIV/0!		0	0	#DIV/0!				#DIV/0!				#DIV/0!				#DIV/0!				#DIV/0!				#DIV/0!				#DIV/0!				#DIV/0!				#DIV/0!				#DIV/0!
		0	0	#DIV/0!	0	0	#DIV/0!		0	0	#DIV/0!				#DIV/0!				#DIV/0!				#DIV/0!				#DIV/0!				#DIV/0!				#DIV/0!				#DIV/0!				#DIV/0!				#DIV/0!
		0	0	#DIV/0!	0	0	#DIV/0!		0	0	#DIV/0!				#DIV/0!				#DIV/0!				#DIV/0!				#DIV/0!				#DIV/0!				#DIV/0!				#DIV/0!				#DIV/0!				#DIV/0!
		0	0	#DIV/0!	0	0	#DIV/0!		0	0	#DIV/0!				#DIV/0!				#DIV/0!				#DIV/0!				#DIV/0!				#DIV/0!				#DIV/0!				#DIV/0!				#DIV/0!				#DIV/0!
		0	0	#DIV/0!	0	0	#DIV/0!		0	0	#DIV/0!				#DIV/0!				#DIV/0!				#DIV/0!				#DIV/0!				#DIV/0!				#DIV/0!				#DIV/0!				#DIV/0!				#DIV/0!
		0	0	#DIV/0!	0	0	#DIV/0!		0	0	#DIV/0!				#DIV/0!				#DIV/0!				#DIV/0!				#DIV/0!				#DIV/0!				#DIV/0!				#DIV/0!				#DIV/0!				#DIV/0!
		0	0	#DIV/0!	0	0	#DIV/0!		0	0	#DIV/0!				#DIV/0!				#DIV/0!				#DIV/0!				#DIV/0!				#DIV/0!				#DIV/0!				#DIV/0!				#DIV/0!				#DIV/0!
		0	0	#DIV/0!	0	0	#DIV/0!		0	0	#DIV/0!				#DIV/0!				#DIV/0!				#DIV/0!				#DIV/0!				#DIV/0!				#DIV/0!				#DIV/0!				#DIV/0!				#DIV/0!
		0	0	#DIV/0!	0	0	#DIV/0!		0	0	#DIV/0!				#DIV/0!				#DIV/0!				#DIV/0!				#DIV/0!				#DIV/0!				#DIV/0!				#DIV/0!				#DIV/0!				#DIV/0!
		0	0	#DIV/0!	0	0	#DIV/0!		0	0	#DIV/0!				#DIV/0!				#DIV/0!				#DIV/0!				#DIV/0!				#DIV/0!				#DIV/0!				#DIV/0!				#DIV/0!				#DIV/0!
		0	0	#DIV/0!	0	0	#DIV/0!		0	0	#DIV/0!				#DIV/0!				#DIV/0!				#DIV/0!				#DIV/0!				#DIV/0!				#DIV/0!				#DIV/0!				#DIV/0!				#DIV/0!
		0	0	#DIV/0!	0	0	#DIV/0!		0	0	#DIV/0!				#DIV/0!				#DIV/0!				#DIV/0!				#DIV/0!				#DIV/0!				#DIV/0!				#DIV/0!				#DIV/0!				#DIV/0!
		0	0	#DIV/0!	0	0	#DIV/0!		0	0	#DIV/0!				#DIV/0!				#DIV/0!				#DIV/0!				#DIV/0!				#DIV/0!				#DIV/0!				#DIV/0!				#DIV/0!				#DIV/0!
		0	0	#DIV/0!	0	0	#DIV/0!		0	0	#DIV/0!				#DIV/0!				#DIV/0!				#DIV/0!				#DIV/0!				#DIV/0!				#DIV/0!				#DIV/0!				#DIV/0!				#DIV/0!
		0	0	#DIV/0!	0	0	#DIV/0!		0	0	#DIV/0!				#DIV/0!				#DIV/0!				#DIV/0!				#DIV/0!				#DIV/0!				#DIV/0!				#DIV/0!				#DIV/0!				#DIV/0!
		0	0	#DIV/0!	0	0	#DIV/0!		0	0	#DIV/0!				#DIV/0!				#DIV/0!				#DIV/0!				#DIV/0!				#DIV/0!				#DIV/0!				#DIV/0!				#DIV/0!				#DIV/0!
		0	0	#DIV/0!	0	0	#DIV/0!		0	0	#DIV/0!				#DIV/0!				#DIV/0!				#DIV/0!				#DIV/0!				#DIV/0!				#DIV/0!				#DIV/0!				#DIV/0!				#DIV/0!
		0	0	#DIV/0!	0	0	#DIV/0!		0	0	#DIV/0!				#DIV/0!				#DIV/0!				#DIV/0!				#DIV/0!				#DIV/0!				#DIV/0!				#DIV/0!				#DIV/0!				#DIV/0!
		0	0	#DIV/0!	0	0	#DIV/0!		0	0	#DIV/0!				#DIV/0!				#DIV/0!				#DIV/0!				#DIV/0!				#DIV/0!				#DIV/0!				#DIV/0!				#DIV/0!				#DIV/0!
		0	0	#DIV/0!	0	0	#DIV/0!		0	0	#DIV/0!				#DIV/0!				#DIV/0!				#DIV/0!				#DIV/0!				#DIV/0!				#DIV/0!				#DIV/0!				#DIV/0!				#DIV/0!
		0	0	#DIV/0!	0	0	#DIV/0!		0	0	#DIV/0!				#DIV/0!				#DIV/0!				#DIV/0!				#DIV/0!				#DIV/0!				#DIV/0!				#DIV/0!				#DIV/0!				#DIV/0!
		0	0	#DIV/0!	0	0	#DIV/0!		0	0	#DIV/0!				#DIV/0!				#DIV/0!				#DIV/0!				#DIV/0!				#DIV/0!				#DIV/0!				#DIV/0!				#DIV/0!				#DIV/0!
		0	0	#DIV/0!	0	0	#DIV/0!		0	0	#DIV/0!				#DIV/0!				#DIV/0!				#DIV/0!				#DIV/0!				#DIV/0!				#DIV/0!				#DIV/0!				#DIV/0!				#DIV/0!
		0	0	#DIV/0!	0	0	#DIV/0!		0	0	#DIV/0!				#DIV/0!				#DIV/0!				#DIV/0!				#DIV/0!				#DIV/0!				#DIV/0!				#DIV/0!				#DIV/0!				#DIV/0!
		0	0	#DIV/0!	0	0	#DIV/0!		0	0	#DIV/0!				#DIV/0!				#DIV/0!				#DIV/0!				#DIV/0!				#DIV/0!				#DIV/0!				#DIV/0!				#DIV/0!				#DIV/0!
		0	0	#DIV/0!	0	0	#DIV/0!		0	0	#DIV/0!				#DIV/0!				#DIV/0!				#DIV/0!				#DIV/0!				#DIV/0!				#DIV/0!				#DIV/0!				#DIV/0!				#DIV/0!
		0	0	#DIV/0!	0	0	#DIV/0!		0	0	#DIV/0!				#DIV/0!				#DIV/0!				#DIV/0!				#DIV/0!				#DIV/0!				#DIV/0!				#DIV/0!				#DIV/0!				#DIV/0!
		0	0	#DIV/0!	0	0	#DIV/0!		0	0	#DIV/0!				#DIV/0!				#DIV/0!				#DIV/0!				#DIV/0!				#DIV/0!				#DIV/0!				#DIV/0!				#DIV/0!				#DIV/0!
		0	0	#DIV/0!	0	0	#DIV/0!		0	0	#DIV/0!				#DIV/0!				#DIV/0!				#DIV/0!				#DIV/0!				#DIV/0!				#DIV/0!				#DIV/0!				#DIV/0!				#DIV/0!
		0	0	#DIV/0!	0	0	#DIV/0!		0	0	#DIV/0!				#DIV/0!				#DIV/0!				#DIV/0!				#DIV/0!				#DIV/0!				#DIV/0!				#DIV/0!				#DIV/0!				#DIV/0!
		0	0	#DIV/0!	0	0	#DIV/0!		0	0	#DIV/0!				#DIV/0!				#DIV/0!				#DIV/0!				#DIV/0!				#DIV/0!				#DIV/0!				#DIV/0!				#DIV/0!				#DIV/0!
		0	0	#DIV/0!	0	0	#DIV/0!		0	0	#DIV/0!				#DIV/0!				#DIV/0!				#DIV/0!				#DIV/0!				#DIV/0!				#DIV/0!				#DIV/0!				#DIV/0!				#DIV/0!
		0	0	#DIV/0!	0	0	#DIV/0!		0	0	#DIV/0!				#DIV/0!				#DIV/0!				#DIV/0!				#DIV/0!				#DIV/0!				#DIV/0!				#DIV/0!				#DIV/0!				#DIV/0!
		0	0	#DIV/0!	0	0	#DIV/0!		0	0	#DIV/0!				#DIV/0!				#DIV/0!				#DIV/0!				#DIV/0!				#DIV/0!				#DIV/0!				#DIV/0!				#DIV/0!				#DIV/0!
		0	0	#DIV/0!	0	0	#DIV/0!		0	0	#DIV/0!				#DIV/0!				#DIV/0!				#DIV/0!				#DIV/0!				#DIV/0!				#DIV/0!				#DIV/0!				#DIV/0!				#DIV/0!
		0	0	#DIV/0!	0	0	#DIV/0!		0	0	#DIV/0!				#DIV/0!				#DIV/0!				#DIV/0!				#DIV/0!				#DIV/0!				#DIV/0!				#DIV/0!				#DIV/0!				#DIV/0!
		0	0	#DIV/0!	0	0	#DIV/0!		0	0	#DIV/0!				#DIV/0!				#DIV/0!				#DIV/0!				#DIV/0!				#DIV/0!				#DIV/0!				#DIV/0!				#DIV/0!				#DIV/0!
		0	0	#DIV/0!	0	0	#DIV/0!		0	0	#DIV/0!				#DIV/0!				#DIV/0!				#DIV/0!				#DIV/0!				#DIV/0!				#DIV/0!				#DIV/0!				#DIV/0!				#DIV/0!
		0	0	#DIV/0!	0	0	#DIV/0!		0	0	#DIV/0!				#DIV/0!				#DIV/0!				#DIV/0!				#DIV/0!				#DIV/0!				#DIV/0!				#DIV/0!				#DIV/0!				#DIV/0!
		0	0	#DIV/0!	0	0	#DIV/0!		0	0	#DIV/0!				#DIV/0!				#DIV/0!				#DIV/0!				#DIV/0!				#DIV/0!				#DIV/0!				#DIV/0!				#DIV/0!				#DIV/0!
		0	0	#DIV/0!	0	0	#DIV/0!		0	0	#DIV/0!				#DIV/0!				#DIV/0!				#DIV/0!				#DIV/0!				#DIV/0!				#DIV/0!				#DIV/0!				#DIV/0!				#DIV/0!
		0	0	#DIV/0!	0	0	#DIV/0!		0	0	#DIV/0!				#DIV/0!				#DIV/0!				#DIV/0!				#DIV/0!				#DIV/0!				#DIV/0!				#DIV/0!				#DIV/0!				#DIV/0!
		0	0	#DIV/0!	0	0	#DIV/0!		0	0	#DIV/0!				#DIV/0!				#DIV/0!				#DIV/0!				#DIV/0!				#DIV/0!				#DIV/0!				#DIV/0!				#DIV/0!				#DIV/0!
		0	0	#DIV/0!	0	0	#DIV/0!		0	0	#DIV/0!				#DIV/0!				#DIV/0!				#DIV/0!				#DIV/0!				#DIV/0!				#DIV/0!				#DIV/0!				#DIV/0!				#DIV/0!
		0	0	#DIV/0!	0	0	#DIV/0!		0	0	#DIV/0!				#DIV/0!				#DIV/0!				#DIV/0!				#DIV/0!				#DIV/0!				#DIV/0!				#DIV/0!				#DIV/0!				#DIV/0!
		0	0	#DIV/0!	0	0	#DIV/0!		0	0	#DIV/0!				#DIV/0!				#DIV/0!				#DIV/0!				#DIV/0!				#DIV/0!				#DIV/0!				#DIV/0!				#DIV/0!				#DIV/0!
		0	0	#DIV/0!	0	0	#DIV/0!		0	0	#DIV/0!				#DIV/0!				#DIV/0!				#DIV/0!				#DIV/0!				#DIV/0!				#DIV/0!				#DIV/0!				#DIV/0!				#DIV/0!
		0	0	#DIV/0!	0	0	#DIV/0!		0	0	#DIV/0!				#DIV/0!				#DIV/0!				#DIV/0!				#DIV/0!				#DIV/0!				#DIV/0!				#DIV/0!				#DIV/0!				#DIV/0!
		0	0	#DIV/0!	0	0	#DIV/0!		0	0	#DIV/0!				#DIV/0!				#DIV/0!				#DIV/0!				#DIV/0!				#DIV/0!				#DIV/0!				#DIV/0!				#DIV/0!				#DIV/0!
		0	0	#DIV/0!	0	0	#DIV/0!		0	0	#DIV/0!				#DIV/0!				#DIV/0!				#DIV/0!				#DIV/0!				#DIV/0!				#DIV/0!				#DIV/0!				#DIV/0!				#DIV/0!
		0	0	#DIV/0!	0	0	#DIV/0!		0	0	#DIV/0!				#DIV/0!				#DIV/0!				#DIV/0!				#DIV/0!				#DIV/0!				#DIV/0!				#DIV/0!				#DIV/0!				#DIV/0!
		0	0	#DIV/0!	0	0	#DIV/0!		0	0	#DIV/0!				#DIV/0!				#DIV/0!				#DIV/0!				#DIV/0!				#DIV/0!				#DIV/0!				#DIV/0!				#DIV/0!				#DIV/0!
		0	0	#DIV/0!	0	0	#DIV/0!		0	0	#DIV/0!				#DIV/0!				#DIV/0!				#DIV/0!				#DIV/0!				#DIV/0!				#DIV/0!				#DIV/0!				#DIV/0!				#DIV/0!
		0	0	#DIV/0!	0	0	#DIV/0!		0	0	#DIV/0!				#DIV/0!				#DIV/0!				#DIV/0!				#DIV/0!				#DIV/0!				#DIV/0!				#DIV/0!				#DIV/0!				#DIV/0!
		0	0	#DIV/0!	0	0	#DIV/0!		0	0	#DIV/0!				#DIV/0!				#DIV/0!				#DIV/0!				#DIV/0!				#DIV/0!				#DIV/0!				#DIV/0!				#DIV/0!				#DIV/0!
		0	0	#DIV/0!	0	0	#DIV/0!		0	0	#DIV/0!				#DIV/0!				#DIV/0!				#DIV/0!				#DIV/0!				#DIV/0!				#DIV/0!				#DIV/0!				#DIV/0!				#DIV/0!
		0	0	#DIV/0!	0	0	#DIV/0!		0	0	#DIV/0!				#DIV/0!				#DIV/0!				#DIV/0!				#DIV/0!				#DIV/0!				#DIV/0!				#DIV/0!				#DIV/0!				#DIV/0!
		0	0	#DIV/0!	0	0	#DIV/0!		0	0	#DIV/0!				#DIV/0!				#DIV/0!				#DIV/0!				#DIV/0!				#DIV/0!				#DIV/0!				#DIV/0!				#DIV/0!				#DIV/0!
		0	0	#DIV/0!	0	0	#DIV/0!		0	0	#DIV/0!				#DIV/0!				#DIV/0!				#DIV/0!				#DIV/0!				#DIV/0!				#DIV/0!				#DIV/0!				#DIV/0!				#DIV/0!
		0	0	#DIV/0!	0	0	#DIV/0!		0	0	#DIV/0!				#DIV/0!				#DIV/0!				#DIV/0!				#DIV/0!				#DIV/0!				#DIV/0!				#DIV/0!				#DIV/0!				#DIV/0!
		0	0	#DIV/0!	0	0	#DIV/0!		0	0	#DIV/0!				#DIV/0!				#DIV/0!				#DIV/0!				#DIV/0!				#DIV/0!				#DIV/0!				#DIV/0!				#DIV/0!				#DIV/0!
		0	0	#DIV/0!	0	0	#DIV/0!		0	0	#DIV/0!				#DIV/0!				#DIV/0!				#DIV/0!				#DIV/0!				#DIV/0!				#DIV/0!				#DIV/0!				#DIV/0!				#DIV/0!
		0	0	#DIV/0!	0	0	#DIV/0!		0	0	#DIV/0!				#DIV/0!				#DIV/0!				#DIV/0!				#DIV/0!				#DIV/0!				#DIV/0!				#DIV/0!				#DIV/0!				#DIV/0!
		0	0	#DIV/0!	0	0	#DIV/0!		0	0	#DIV/0!				#DIV/0!				#DIV/0!				#DIV/0!				#DIV/0!				#DIV/0!				#DIV/0!				#DIV/0!				#DIV/0!				#DIV/0!
		0	0	#DIV/0!	0	0	#DIV/0!		0	0	#DIV/0!				#DIV/0!				#DIV/0!				#DIV/0!				#DIV/0!				#DIV/0!				#DIV/0!				#DIV/0!				#DIV/0!				#DIV/0!
		0	0	#DIV/0!	0	0	#DIV/0!		0	0	#DIV/0!				#DIV/0!				#DIV/0!				#DIV/0!				#DIV/0!				#DIV/0!				#DIV/0!				#DIV/0!				#DIV/0!				#DIV/0!
		0	0	#DIV/0!	0	0	#DIV/0!		0	0	#DIV/0!				#DIV/0!				#DIV/0!				#DIV/0!				#DIV/0!				#DIV/0!				#DIV/0!				#DIV/0!				#DIV/0!				#DIV/0!
		0	0	#DIV/0!	0	0	#DIV/0!		0	0	#DIV/0!				#DIV/0!				#DIV/0!				#DIV/0!				#DIV/0!				#DIV/0!				#DIV/0!				#DIV/0!				#DIV/0!				#DIV/0!
		0	0	#DIV/0!	0	0	#DIV/0!		0	0	#DIV/0!				#DIV/0!				#DIV/0!				#DIV/0!				#DIV/0!				#DIV/0!				#DIV/0!				#DIV/0!				#DIV/0!				#DIV/0!
		0	0	#DIV/0!	0	0	#DIV/0!		0	0	#DIV/0!				#DIV/0!				#DIV/0!				#DIV/0!				#DIV/0!				#DIV/0!				#DIV/0!				#DIV/0!				#DIV/0!				#DIV/0!
		0	0	#DIV/0!	0	0	#DIV/0!		0	0	#DIV/0!				#DIV/0!				#DIV/0!				#DIV/0!				#DIV/0!				#DIV/0!				#DIV/0!				#DIV/0!				#DIV/0!				#DIV/0!
		0	0	#DIV/0!	0	0	#DIV/0!		0	0	#DIV/0!				#DIV/0!				#DIV/0!				#DIV/0!				#DIV/0!				#DIV/0!				#DIV/0!				#DIV/0!				#DIV/0!				#DIV/0!
		0	0	#DIV/0!	0	0	#DIV/0!		0	0	#DIV/0!				#DIV/0!				#DIV/0!				#DIV/0!				#DIV/0!				#DIV/0!				#DIV/0!				#DIV/0!				#DIV/0!				#DIV/0!
		0	0	#DIV/0!	0	0	#DIV/0!		0	0	#DIV/0!				#DIV/0!				#DIV/0!				#DIV/0!				#DIV/0!				#DIV/0!				#DIV/0!				#DIV/0!				#DIV/0!				#DIV/0!
		0	0	#DIV/0!	0	0	#DIV/0!		0	0	#DIV/0!				#DIV/0!				#DIV/0!				#DIV/0!				#DIV/0!				#DIV/0!				#DIV/0!				#DIV/0!				#DIV/0!				#DIV/0!
		0	0	#DIV/0!	0	0	#DIV/0!		0	0	#DIV/0!				#DIV/0!				#DIV/0!				#DIV/0!				#DIV/0!				#DIV/0!				#DIV/0!				#DIV/0!				#DIV/0!				#DIV/0!
		0	0	#DIV/0!	0	0	#DIV/0!		0	0	#DIV/0!				#DIV/0!				#DIV/0!				#DIV/0!				#DIV/0!				#DIV/0!				#DIV/0!				#DIV/0!				#DIV/0!				#DIV/0!
		0	0	#DIV/0!	0	0	#DIV/0!		0	0	#DIV/0!				#DIV/0!				#DIV/0!				#DIV/0!				#DIV/0!				#DIV/0!				#DIV/0!				#DIV/0!				#DIV/0!				#DIV/0!
		0	0	#DIV/0!	0	0	#DIV/0!		0	0	#DIV/0!				#DIV/0!				#DIV/0!				#DIV/0!				#DIV/0!				#DIV/0!				#DIV/0!				#DIV/0!				#DIV/0!				#DIV/0!
		0	0	#DIV/0!	0	0	#DIV/0!		0	0	#DIV/0!				#DIV/0!				#DIV/0!				#DIV/0!				#DIV/0!				#DIV/0!				#DIV/0!				#DIV/0!				#DIV/0!				#DIV/0!
		0	0	#DIV/0!	0	0	#DIV/0!		0	0	#DIV/0!				#DIV/0!				#DIV/0!				#DIV/0!				#DIV/0!				#DIV/0!				#DIV/0!				#DIV/0!				#DIV/0!				#DIV/0!
		0	0	#DIV/0!	0	0	#DIV/0!		0	0	#DIV/0!				#DIV/0!				#DIV/0!				#DIV/0!				#DIV/0!				#DIV/0!				#DIV/0!				#DIV/0!				#DIV/0!				#DIV/0!
		0	0	#DIV/0!	0	0	#DIV/0!		0	0	#DIV/0!				#DIV/0!				#DIV/0!				#DIV/0!				#DIV/0!				#DIV/0!				#DIV/0!				#DIV/0!				#DIV/0!				#DIV/0!
		0	0	#DIV/0!	0	0	#DIV/0!		0	0	#DIV/0!				#DIV/0!				#DIV/0!				#DIV/0!				#DIV/0!				#DIV/0!				#DIV/0!				#DIV/0!				#DIV/0!				#DIV/0!
		0	0	#DIV/0!	0	0	#DIV/0!		0	0	#DIV/0!				#DIV/0!				#DIV/0!				#DIV/0!				#DIV/0!				#DIV/0!				#DIV/0!				#DIV/0!				#DIV/0!				#DIV/0!
		0	0	#DIV/0!	0	0	#DIV/0!		0	0	#DIV/0!				#DIV/0!				#DIV/0!				#DIV/0!				#DIV/0!				#DIV/0!				#DIV/0!				#DIV/0!				#DIV/0!				#DIV/0!
		0	0	#DIV/0!	0	0	#DIV/0!		0	0	#DIV/0!				#DIV/0!				#DIV/0!				#DIV/0!				#DIV/0!				#DIV/0!				#DIV/0!				#DIV/0!				#DIV/0!				#DIV/0!
		0	0	#DIV/0!	0	0	#DIV/0!		0	0	#DIV/0!				#DIV/0!				#DIV/0!				#DIV/0!				#DIV/0!				#DIV/0!				#DIV/0!				#DIV/0!				#DIV/0!				#DIV/0!
		0	0	#DIV/0!	0	0	#DIV/0!		0	0	#DIV/0!				#DIV/0!				#DIV/0!				#DIV/0!				#DIV/0!				#DIV/0!				#DIV/0!				#DIV/0!				#DIV/0!				#DIV/0!
		0	0	#DIV/0!	0	0	#DIV/0!		0	0	#DIV/0!				#DIV/0!				#DIV/0!				#DIV/0!				#DIV/0!				#DIV/0!				#DIV/0!				#DIV/0!				#DIV/0!				#DIV/0!
		0	0	#DIV/0!	0	0	#DIV/0!		0	0	#DIV/0!				#DIV/0!				#DIV/0!				#DIV/0!				#DIV/0!				#DIV/0!				#DIV/0!				#DIV/0!				#DIV/0!				#DIV/0!
		0	0	#DIV/0!	0	0	#DIV/0!		0	0	#DIV/0!				#DIV/0!				#DIV/0!				#DIV/0!				#DIV/0!				#DIV/0!				#DIV/0!				#DIV/0!				#DIV/0!				#DIV/0!
		0	0	#DIV/0!	0	0	#DIV/0!		0	0	#DIV/0!				#DIV/0!				#DIV/0!				#DIV/0!				#DIV/0!				#DIV/0!				#DIV/0!				#DIV/0!				#DIV/0!				#DIV/0!
		0	0	#DIV/0!	0	0	#DIV/0!		0	0	#DIV/0!				#DIV/0!				#DIV/0!				#DIV/0!				#DIV/0!				#DIV/0!				#DIV/0!				#DIV/0!				#DIV/0!				#DIV/0!
		0	0	#DIV/0!	0	0	#DIV/0!		0	0	#DIV/0!				#DIV/0!				#DIV/0!				#DIV/0!				#DIV/0!				#DIV/0!				#DIV/0!				#DIV/0!				#DIV/0!				#DIV/0!
		0	0	#DIV/0!	0	0	#DIV/0!		0	0	#DIV/0!				#DIV/0!				#DIV/0!				#DIV/0!				#DIV/0!				#DIV/0!				#DIV/0!				#DIV/0!				#DIV/0!				#DIV/0!
		0	0	#DIV/0!	0	0	#DIV/0!		0	0	#DIV/0!				#DIV/0!				#DIV/0!				#DIV/0!				#DIV/0!				#DIV/0!				#DIV/0!				#DIV/0!				#DIV/0!				#DIV/0!
		0	0	#DIV/0!	0	0	#DIV/0!		0	0	#DIV/0!				#DIV/0!				#DIV/0!				#DIV/0!				#DIV/0!				#DIV/0!				#DIV/0!				#DIV/0!				#DIV/0!				#DIV/0!
		0	0	#DIV/0!	0	0	#DIV/0!		0	0	#DIV/0!				#DIV/0!				#DIV/0!				#DIV/0!				#DIV/0!				#DIV/0!				#DIV/0!				#DIV/0!				#DIV/0!				#DIV/0!
		0	0	#DIV/0!	0	0	#DIV/0!		0	0	#DIV/0!				#DIV/0!				#DIV/0!				#DIV/0!				#DIV/0!				#DIV/0!				#DIV/0!				#DIV/0!				#DIV/0!				#DIV/0!
		0	0	#DIV/0!	0	0	#DIV/0!		0	0	#DIV/0!				#DIV/0!				#DIV/0!				#DIV/0!				#DIV/0!				#DIV/0!				#DIV/0!				#DIV/0!				#DIV/0!				#DIV/0!
		0	0	#DIV/0!	0	0	#DIV/0!		0	0	#DIV/0!				#DIV/0!				#DIV/0!				#DIV/0!				#DIV/0!				#DIV/0!				#DIV/0!				#DIV/0!				#DIV/0!				#DIV/0!
		0	0	#DIV/0!	0	0	#DIV/0!		0	0	#DIV/0!				#DIV/0!				#DIV/0!				#DIV/0!				#DIV/0!				#DIV/0!				#DIV/0!				#DIV/0!				#DIV/0!				#DIV/0!
		0	0	#DIV/0!	0	0	#DIV/0!		0	0	#DIV/0!				#DIV/0!				#DIV/0!				#DIV/0!				#DIV/0!				#DIV/0!				#DIV/0!				#DIV/0!				#DIV/0!				#DIV/0!
		0	0	#DIV/0!	0	0	#DIV/0!		0	0	#DIV/0!				#DIV/0!				#DIV/0!				#DIV/0!				#DIV/0!				#DIV/0!				#DIV/0!				#DIV/0!				#DIV/0!				#DIV/0!
		0	0	#DIV/0!	0	0	#DIV/0!		0	0	#DIV/0!				#DIV/0!				#DIV/0!				#DIV/0!				#DIV/0!				#DIV/0!				#DIV/0!				#DIV/0!				#DIV/0!				#DIV/0!
		0	0	#DIV/0!	0	0	#DIV/0!		0	0	#DIV/0!				#DIV/0!				#DIV/0!				#DIV/0!				#DIV/0!				#DIV/0!				#DIV/0!				#DIV/0!				#DIV/0!				#DIV/0!
		0	0	#DIV/0!	0	0	#DIV/0!		0	0	#DIV/0!				#DIV/0!				#DIV/0!				#DIV/0!				#DIV/0!				#DIV/0!				#DIV/0!				#DIV/0!				#DIV/0!				#DIV/0!
		0	0	#DIV/0!	0	0	#DIV/0!		0	0	#DIV/0!				#DIV/0!				#DIV/0!				#DIV/0!				#DIV/0!				#DIV/0!				#DIV/0!				#DIV/0!				#DIV/0!				#DIV/0!
		0	0	#DIV/0!	0	0	#DIV/0!		0	0	#DIV/0!				#DIV/0!				#DIV/0!				#DIV/0!				#DIV/0!				#DIV/0!				#DIV/0!				#DIV/0!				#DIV/0!				#DIV/0!
		0	0	#DIV/0!	0	0	#DIV/0!		0	0	#DIV/0!				#DIV/0!				#DIV/0!				#DIV/0!				#DIV/0!				#DIV/0!				#DIV/0!				#DIV/0!				#DIV/0!				#DIV/0!
		0	0	#DIV/0!	0	0	#DIV/0!		0	0	#DIV/0!				#DIV/0!				#DIV/0!				#DIV/0!				#DIV/0!				#DIV/0!				#DIV/0!				#DIV/0!				#DIV/0!				#DIV/0!
		0	0	#DIV/0!	0	0	#DIV/0!		0	0	#DIV/0!				#DIV/0!				#DIV/0!				#DIV/0!				#DIV/0!				#DIV/0!				#DIV/0!				#DIV/0!				#DIV/0!				#DIV/0!
		0	0	#DIV/0!	0	0	#DIV/0!		0	0	#DIV/0!				#DIV/0!				#DIV/0!				#DIV/0!				#DIV/0!				#DIV/0!				#DIV/0!				#DIV/0!				#DIV/0!				#DIV/0!
		0	0	#DIV/0!	0	0	#DIV/0!		0	0	#DIV/0!				#DIV/0!				#DIV/0!				#DIV/0!				#DIV/0!				#DIV/0!				#DIV/0!				#DIV/0!				#DIV/0!				#DIV/0!
		0	0	#DIV/0!	0	0	#DIV/0!		0	0	#DIV/0!				#DIV/0!				#DIV/0!				#DIV/0!				#DIV/0!				#DIV/0!				#DIV/0!				#DIV/0!				#DIV/0!				#DIV/0!
		0	0	#DIV/0!	0	0	#DIV/0!		0	0	#DIV/0!				#DIV/0!				#DIV/0!				#DIV/0!				#DIV/0!				#DIV/0!				#DIV/0!				#DIV/0!				#DIV/0!				#DIV/0!
		0	0	#DIV/0!	0	0	#DIV/0!		0	0	#DIV/0!				#DIV/0!				#DIV/0!				#DIV/0!				#DIV/0!				#DIV/0!				#DIV/0!				#DIV/0!				#DIV/0!				#DIV/0!
		0	0	#DIV/0!	0	0	#DIV/0!		0	0	#DIV/0!				#DIV/0!				#DIV/0!				#DIV/0!				#DIV/0!				#DIV/0!				#DIV/0!				#DIV/0!				#DIV/0!				#DIV/0!
		0	0	#DIV/0!	0	0	#DIV/0!		0	0	#DIV/0!				#DIV/0!				#DIV/0!				#DIV/0!				#DIV/0!				#DIV/0!				#DIV/0!				#DIV/0!				#DIV/0!				#DIV/0!
		0	0	#DIV/0!	0	0	#DIV/0!		0	0	#DIV/0!				#DIV/0!				#DIV/0!				#DIV/0!				#DIV/0!				#DIV/0!				#DIV/0!				#DIV/0!				#DIV/0!				#DIV/0!
		0	0	#DIV/0!	0	0	#DIV/0!		0	0	#DIV/0!				#DIV/0!				#DIV/0!				#DIV/0!				#DIV/0!				#DIV/0!				#DIV/0!				#DIV/0!				#DIV/0!				#DIV/0!
		0	0	#DIV/0!	0	0	#DIV/0!		0	0	#DIV/0!				#DIV/0!				#DIV/0!				#DIV/0!				#DIV/0!				#DIV/0!				#DIV/0!				#DIV/0!				#DIV/0!				#DIV/0!
		0	0	#DIV/0!	0	0	#DIV/0!		0	0	#DIV/0!				#DIV/0!				#DIV/0!				#DIV/0!				#DIV/0!				#DIV/0!				#DIV/0!				#DIV/0!				#DIV/0!				#DIV/0!
		0	0	#DIV/0!	0	0	#DIV/0!		0	0	#DIV/0!				#DIV/0!				#DIV/0!				#DIV/0!				#DIV/0!				#DIV/0!				#DIV/0!				#DIV/0!				#DIV/0!				#DIV/0!
		0	0	#DIV/0!	0	0	#DIV/0!		0	0	#DIV/0!				#DIV/0!				#DIV/0!				#DIV/0!				#DIV/0!				#DIV/0!				#DIV/0!				#DIV/0!				#DIV/0!				#DIV/0!
		0	0	#DIV/0!	0	0	#DIV/0!		0	0	#DIV/0!				#DIV/0!				#DIV/0!				#DIV/0!				#DIV/0!				#DIV/0!				#DIV/0!				#DIV/0!				#DIV/0!				#DIV/0!
		0	0	#DIV/0!	0	0	#DIV/0!		0	0	#DIV/0!				#DIV/0!				#DIV/0!				#DIV/0!				#DIV/0!				#DIV/0!				#DIV/0!				#DIV/0!				#DIV/0!				#DIV/0!
		0	0	#DIV/0!	0	0	#DIV/0!		0	0	#DIV/0!				#DIV/0!				#DIV/0!				#DIV/0!				#DIV/0!				#DIV/0!				#DIV/0!				#DIV/0!				#DIV/0!				#DIV/0!
		0	0	#DIV/0!	0	0	#DIV/0!		0	0	#DIV/0!				#DIV/0!				#DIV/0!				#DIV/0!				#DIV/0!				#DIV/0!				#DIV/0!				#DIV/0!				#DIV/0!				#DIV/0!
		0	0	#DIV/0!	0	0	#DIV/0!		0	0	#DIV/0!				#DIV/0!				#DIV/0!				#DIV/0!				#DIV/0!				#DIV/0!				#DIV/0!				#DIV/0!				#DIV/0!				#DIV/0!
		0	0	#DIV/0!	0	0	#DIV/0!		0	0	#DIV/0!				#DIV/0!				#DIV/0!				#DIV/0!				#DIV/0!				#DIV/0!				#DIV/0!				#DIV/0!				#DIV/0!				#DIV/0!
		0	0	#DIV/0!	0	0	#DIV/0!		0	0	#DIV/0!				#DIV/0!				#DIV/0!				#DIV/0!				#DIV/0!				#DIV/0!				#DIV/0!				#DIV/0!				#DIV/0!				#DIV/0!
		0	0	#DIV/0!	0	0	#DIV/0!		0	0	#DIV/0!				#DIV/0!				#DIV/0!				#DIV/0!				#DIV/0!				#DIV/0!				#DIV/0!				#DIV/0!				#DIV/0!				#DIV/0!
		0	0	#DIV/0!	0	0	#DIV/0!		0	0	#DIV/0!				#DIV/0!				#DIV/0!				#DIV/0!				#DIV/0!				#DIV/0!				#DIV/0!				#DIV/0!				#DIV/0!				#DIV/0!
		0	0	#DIV/0!	0	0	#DIV/0!		0	0	#DIV/0!				#DIV/0!				#DIV/0!				#DIV/0!				#DIV/0!				#DIV/0!				#DIV/0!				#DIV/0!				#DIV/0!				#DIV/0!
		0	0	#DIV/0!	0	0	#DIV/0!		0	0	#DIV/0!				#DIV/0!				#DIV/0!				#DIV/0!				#DIV/0!				#DIV/0!				#DIV/0!				#DIV/0!				#DIV/0!				#DIV/0!
		0	0	#DIV/0!	0	0	#DIV/0!		0	0	#DIV/0!				#DIV/0!				#DIV/0!				#DIV/0!				#DIV/0!				#DIV/0!				#DIV/0!				#DIV/0!				#DIV/0!				#DIV/0!
		0	0	#DIV/0!	0	0	#DIV/0!		0	0	#DIV/0!				#DIV/0!				#DIV/0!				#DIV/0!				#DIV/0!				#DIV/0!				#DIV/0!				#DIV/0!				#DIV/0!				#DIV/0!
		0	0	#DIV/0!	0	0	#DIV/0!		0	0	#DIV/0!				#DIV/0!				#DIV/0!				#DIV/0!				#DIV/0!				#DIV/0!				#DIV/0!				#DIV/0!				#DIV/0!				#DIV/0!
		0	0	#DIV/0!	0	0	#DIV/0!		0	0	#DIV/0!				#DIV/0!				#DIV/0!				#DIV/0!				#DIV/0!				#DIV/0!				#DIV/0!				#DIV/0!				#DIV/0!				#DIV/0!
		0	0	#DIV/0!	0	0	#DIV/0!		0	0	#DIV/0!				#DIV/0!				#DIV/0!				#DIV/0!				#DIV/0!				#DIV/0!				#DIV/0!				#DIV/0!				#DIV/0!				#DIV/0!
[truncated: 115 more columns]

## Sheet: 4-digestive
Tumours of the digestive system
TABLE 3 - Prevalence of TERT promoter mutations		Prev(n)	Total(n)	Total(%)	p1	t1	%	ref1	p2	t2	%	ref2	p3	t3	%	ref3	p4	t4	%	ref4	p5	t5	%	ref5	p6	t6	%	ref6	p7	t7	%	ref7	p8	t8	%	ref8	p9	t9	%	ref9	p10	t10	%	ref10	p11	t11	%	ref11	p12
Tumours of the liver and intrahepatic bile ducts	Borderline lesions between hepatocellular adenoma and hepatocellular carcinoma	3	18	0.166667	3	18	0.166667	Pilati2014
Tumours of the liver and intrahepatic bile ducts	Hepatocellular carcinoma derived from hepatocellular adenoma	12	25	0.48	7	16	0.4375	Nault2013	5	9	0.555556	Pilati2014
Tumours of the liver and intrahepatic bile ducts	Fibrolamellar hepatocellular carcinoma	1	20	0.05	0	12	0	Nault2013	1	8	0.125	Quaas2014
Tumours of the liver and intrahepatic bile ducts	Hepatocellular carcinoma	1263	3093	0.408341	27	61	0.442623	Killela2013	179	305	0.586885	Nault2013	36	70	0.514286	Quaas2014	57	197	0.28934	Chen2014	255	469	0.54371	Totoki2014	11	35	0.314286	Huang2015	38	60	0.633333	Fujimoto2015	15	44	0.340909	Cevik2015	81	259	0.312741	Schulze2015	15	57	0.263158	Schulze2015	85	276	0.307971	Yang2016	41
Tumours of the gallbladder and extrahepatic bile ducts	Gallbladder carcinoma, NOS	15	166	0.0903614	0	10	0	Killela2013	14	154	0.0909091	Qu2014	1	2	0.5	Huang2015
Tumours of the oesophagus	Oesophageal squamous cell carcinoma	5	313	0.0159744	5	313	0.0159744	Zhao2014
Tumours of the oesophagus	Oesophageal adenocarcinoma, NOS	0	90	0	0	90	0	Nistelrooij2014
Tumours of the stomach	Moderately differentiated adenocarcinoma, NOS	0	29	0	0	29	0	Liu2014
Tumours of the stomach	Moderately to poorly differentiated adenocarcinoma, NOS	0	39	0	0	39	0	Liu2014
Tumours of the stomach	Poorly differentiated adenocarcinoma, NOS	0	119	0	0	119	0	Liu2014
Tumours of the stomach	Mucous adenocarcinoma	0	13	0	0	13	0	Liu2014
Tumours of the stomach	Well-differentiated gastric cancer, NOS*		90			90	0	Qu2014
Tumours of the stomach	Poorly-differentiated gastric cancer, NOS*		178			178	0	Qu2014
Tumours of the stomach	Gastric cancer of both intestinal and diffuse types, NOS	0	74	0	0	74	0	Huang2015
Tumours of the colon and rectum	Colorectal adenocarcinoma, NOS	0	22	0	0	22	0	Killela2013
Tumours of the liver and intrahepatic bile ducts	Hepatoblastoma	0	18	0	0	3	0	Killela2013	0	15	0	Eichemuller2014
Tumours of the liver and intrahepatic bile ducts	Hepatocellular adenoma, NOS	0	238	0	0	15	0	Quaas2014	0	223	0	Pilati2014
Tumours of the liver and intrahepatic bile ducts	Intrahepatic cholangiocarcinoma	0	65	0	0	52	0	Quaas2015	0	13	0	Totoki2014
Tumours of the gallbladder and extrahepatic bile ducts	Extrahepatic cholangiocarcinoma	0	6	0	0	6	0	Huang2015
Tumours of the gallbladder and extrahepatic bile ducts	Extrahepatic cholangiosarcoma	0	28	0	0	28	0	Killela2013
Tumours of the exocrine pancreas	Pancreatic ductal adenocarcinoma	0	24	0	0	24	0	Killela2013
Tumours of the exocrine pancreas	Pancreatic acinar cell carcinoma	0	25	0	0	25	0	Killela2013
Tumours of the exocrine pancreas	Pancreatic cancer, NOS	0	46	0	0	46	0	Huang2015
Note: *2 out of 268 gastric cancer patients harboured TERTp mutations			4739
TABLE 4A - Prevalence of TERT amplifications		Prev(n)	Total(n)	Total(%)	p1	t1	%	ref1	p2	t2	%	ref2	p3	t3	%	ref3
Tumours of the colon and rectum	Colorectal carcinoma, NOS	31	64	0.484375	31	64	0.484375	Palmqvist2005
Tumours of the liver and intrahepatic bile ducts	Hepatocellular carcinoma, NOS	27	181	0.149171	10	46	0.217391	Takuma2004	13	18	0.722222	Totoki2014	4	117	0.034188	Schulze2015
			245
TABLE 4B - Prevalence of TERC amplifications		Prev(n)	Total(n)	Total(%)	p1	t1	%	ref1
Tumours of the oesophagus	Oesophageal carcinoma, NOS	36	168	0.214286	36	168	0.214286	Barthel2017
TABLE 6 - Prevalence of ALT		Prev(n)	Total(n)	Total(%)	p1	t1	%	ref1	p2	t2	%	ref2
Tumours of the liver and intrahepatic bile ducts	Hepatocellular carcinoma, NOS	8	121	0.0661157	8	121	0.0661157	Heaphy2011
Tumours of the liver and intrahepatic bile ducts	Chromophobe hepatocellular carcinoma with abrupt anaplasia	11	12	0.916667	11	12	0.916667	Wood2013
Tumours of the stomach	Gastric adenocarcinoma, NOS	16	197	0.0812183	16	42	0.380952	Omori2009	0	155	0	Heaphy2011
Tumours of the eosophagus	Oesophageal adenocarcinoma	1	106	0.00943396	1	106	0.00943396	Heaphy2011
Tumours of the eosophagus	Oesophageal small cell neuroendocrine carcinoma	0	1	0	0	1	0	Heaphy2011
Tumours of the eosophagus	Oesophageal squamous cell carcinoma	0	29	0	0	29	0	Heaphy2011
Tumours of the small intestine	Adenocarcinoma of the small intestine, NOS	0	215	0	0	215	0	Heaphy2011
Tumours of the colon and rectum	Colon adenoma, NOS	0	136	0	0	136	0	Heaphy2011
Tumours of the colon and rectum	Colon adenocarcinoma, NOS	0	126	0	0	126	0	Heaphy2011
Tumours of the liver and intrahepatic bile ducts	Hepatocellular adenoma, NOS	0	17	0	0	17	0	Heaphy2011
Tumours of the gallbladder and extrahepatic bile ducts	Extrahepatic cholangiocarcinoma	0	33	0	0	33	0	Heaphy2011
Tumours of the gallbladder and extrahepatic bile ducts	Adenocarcinoma of the gallbladder, NOS	1	60	0.0166667	1	60	0.0166667	Heaphy2011
Tumours of the exocrine pancreas	Pancreatic ductal adenocarcinoma	0	448	0	0	448	0	Heaphy2011
n/a	Gastrointestinal carcinoid tumour, NOS/SNS	0	47	0	0	47	0	Dogeas2014
n/a	Carcinoid tumour, NOS/SNS	2	32	0.0625	2	32	0.0625	Heaphy2011
			1580
NOS non otherwise specified, SNS site not specified
			3160		0	0	#DIV/0!		0	0	#DIV/0!				#DIV/0!
					0	0	#DIV/0!		0	0	#DIV/0!				#DIV/0!
		0	0	#DIV/0!	0	0	#DIV/0!		0	0	#DIV/0!				#DIV/0!
		0	0	#DIV/0!	0	0	#DIV/0!		0	0	#DIV/0!				#DIV/0!
		0	0	#DIV/0!	0	0	#DIV/0!		0	0	#DIV/0!				#DIV/0!
		0	0	#DIV/0!	0	0	#DIV/0!		0	0	#DIV/0!				#DIV/0!
		0	0	#DIV/0!	0	0	#DIV/0!		0	0	#DIV/0!				#DIV/0!
		0	0	#DIV/0!	0	0	#DIV/0!		0	0	#DIV/0!				#DIV/0!
		0	0	#DIV/0!	0	0	#DIV/0!		0	0	#DIV/0!				#DIV/0!
		0	0	#DIV/0!	0	0	#DIV/0!		0	0	#DIV/0!				#DIV/0!
		0	0	#DIV/0!	0	0	#DIV/0!		0	0	#DIV/0!				#DIV/0!
		0	0	#DIV/0!	0	0	#DIV/0!		0	0	#DIV/0!				#DIV/0!
		0	0	#DIV/0!	0	0	#DIV/0!		0	0	#DIV/0!				#DIV/0!
		0	0	#DIV/0!	0	0	#DIV/0!		0	0	#DIV/0!				#DIV/0!
		0	0	#DIV/0!	0	0	#DIV/0!		0	0	#DIV/0!				#DIV/0!
		0	0	#DIV/0!	0	0	#DIV/0!		0	0	#DIV/0!				#DIV/0!
		0	0	#DIV/0!	0	0	#DIV/0!		0	0	#DIV/0!				#DIV/0!
		0	0	#DIV/0!	0	0	#DIV/0!		0	0	#DIV/0!				#DIV/0!
		0	0	#DIV/0!	0	0	#DIV/0!		0	0	#DIV/0!				#DIV/0!
		0	0	#DIV/0!	0	0	#DIV/0!		0	0	#DIV/0!				#DIV/0!
		0	0	#DIV/0!	0	0	#DIV/0!		0	0	#DIV/0!				#DIV/0!
		0	0	#DIV/0!	0	0	#DIV/0!		0	0	#DIV/0!				#DIV/0!
		0	0	#DIV/0!	0	0	#DIV/0!		0	0	#DIV/0!				#DIV/0!
		0	0	#DIV/0!	0	0	#DIV/0!		0	0	#DIV/0!				#DIV/0!
		0	0	#DIV/0!	0	0	#DIV/0!		0	0	#DIV/0!				#DIV/0!
		0	0	#DIV/0!	0	0	#DIV/0!		0	0	#DIV/0!				#DIV/0!
		0	0	#DIV/0!	0	0	#DIV/0!		0	0	#DIV/0!				#DIV/0!
		0	0	#DIV/0!	0	0	#DIV/0!		0	0	#DIV/0!				#DIV/0!
		0	0	#DIV/0!	0	0	#DIV/0!		0	0	#DIV/0!				#DIV/0!
		0	0	#DIV/0!	0	0	#DIV/0!		0	0	#DIV/0!				#DIV/0!
		0	0	#DIV/0!	0	0	#DIV/0!		0	0	#DIV/0!				#DIV/0!
		0	0	#DIV/0!	0	0	#DIV/0!		0	0	#DIV/0!				#DIV/0!
		0	0	#DIV/0!	0	0	#DIV/0!		0	0	#DIV/0!				#DIV/0!
		0	0	#DIV/0!	0	0	#DIV/0!		0	0	#DIV/0!				#DIV/0!
		0	0	#DIV/0!	0	0	#DIV/0!		0	0	#DIV/0!				#DIV/0!
		0	0	#DIV/0!	0	0	#DIV/0!		0	0	#DIV/0!				#DIV/0!
		0	0	#DIV/0!	0	0	#DIV/0!		0	0	#DIV/0!				#DIV/0!
		0	0	#DIV/0!	0	0	#DIV/0!		0	0	#DIV/0!				#DIV/0!
		0	0	#DIV/0!	0	0	#DIV/0!		0	0	#DIV/0!				#DIV/0!
		0	0	#DIV/0!	0	0	#DIV/0!		0	0	#DIV/0!				#DIV/0!
		0	0	#DIV/0!	0	0	#DIV/0!		0	0	#DIV/0!				#DIV/0!
		0	0	#DIV/0!	0	0	#DIV/0!		0	0	#DIV/0!				#DIV/0!
		0	0	#DIV/0!	0	0	#DIV/0!		0	0	#DIV/0!				#DIV/0!
		0	0	#DIV/0!	0	0	#DIV/0!		0	0	#DIV/0!				#DIV/0!
		0	0	#DIV/0!	0	0	#DIV/0!		0	0	#DIV/0!				#DIV/0!
		0	0	#DIV/0!	0	0	#DIV/0!		0	0	#DIV/0!				#DIV/0!
		0	0	#DIV/0!	0	0	#DIV/0!		0	0	#DIV/0!				#DIV/0!
		0	0	#DIV/0!	0	0	#DIV/0!		0	0	#DIV/0!				#DIV/0!
		0	0	#DIV/0!	0	0	#DIV/0!		0	0	#DIV/0!				#DIV/0!
		0	0	#DIV/0!	0	0	#DIV/0!		0	0	#DIV/0!				#DIV/0!
		0	0	#DIV/0!	0	0	#DIV/0!		0	0	#DIV/0!				#DIV/0!
		0	0	#DIV/0!	0	0	#DIV/0!		0	0	#DIV/0!				#DIV/0!
		0	0	#DIV/0!	0	0	#DIV/0!		0	0	#DIV/0!				#DIV/0!
		0	0	#DIV/0!	0	0	#DIV/0!		0	0	#DIV/0!				#DIV/0!
		0	0	#DIV/0!	0	0	#DIV/0!		0	0	#DIV/0!				#DIV/0!
		0	0	#DIV/0!	0	0	#DIV/0!		0	0	#DIV/0!				#DIV/0!
		0	0	#DIV/0!	0	0	#DIV/0!		0	0	#DIV/0!				#DIV/0!
		0	0	#DIV/0!	0	0	#DIV/0!		0	0	#DIV/0!				#DIV/0!
		0	0	#DIV/0!	0	0	#DIV/0!		0	0	#DIV/0!				#DIV/0!
		0	0	#DIV/0!	0	0	#DIV/0!		0	0	#DIV/0!				#DIV/0!
		0	0	#DIV/0!	0	0	#DIV/0!		0	0	#DIV/0!				#DIV/0!
		0	0	#DIV/0!	0	0	#DIV/0!		0	0	#DIV/0!				#DIV/0!
		0	0	#DIV/0!	0	0	#DIV/0!		0	0	#DIV/0!				#DIV/0!
		0	0	#DIV/0!	0	0	#DIV/0!		0	0	#DIV/0!				#DIV/0!
		0	0	#DIV/0!	0	0	#DIV/0!		0	0	#DIV/0!				#DIV/0!
		0	0	#DIV/0!	0	0	#DIV/0!		0	0	#DIV/0!				#DIV/0!
		0	0	#DIV/0!	0	0	#DIV/0!		0	0	#DIV/0!				#DIV/0!
		0	0	#DIV/0!	0	0	#DIV/0!		0	0	#DIV/0!				#DIV/0!
		0	0	#DIV/0!	0	0	#DIV/0!		0	0	#DIV/0!				#DIV/0!
		0	0	#DIV/0!	0	0	#DIV/0!		0	0	#DIV/0!				#DIV/0!
		0	0	#DIV/0!	0	0	#DIV/0!		0	0	#DIV/0!				#DIV/0!
		0	0	#DIV/0!	0	0	#DIV/0!		0	0	#DIV/0!				#DIV/0!
		0	0	#DIV/0!	0	0	#DIV/0!		0	0	#DIV/0!				#DIV/0!
		0	0	#DIV/0!	0	0	#DIV/0!		0	0	#DIV/0!				#DIV/0!
		0	0	#DIV/0!	0	0	#DIV/0!		0	0	#DIV/0!				#DIV/0!
		0	0	#DIV/0!	0	0	#DIV/0!		0	0	#DIV/0!				#DIV/0!
		0	0	#DIV/0!	0	0	#DIV/0!		0	0	#DIV/0!				#DIV/0!
		0	0	#DIV/0!	0	0	#DIV/0!		0	0	#DIV/0!				#DIV/0!
		0	0	#DIV/0!	0	0	#DIV/0!		0	0	#DIV/0!				#DIV/0!
		0	0	#DIV/0!	0	0	#DIV/0!		0	0	#DIV/0!				#DIV/0!
		0	0	#DIV/0!	0	0	#DIV/0!		0	0	#DIV/0!				#DIV/0!
		0	0	#DIV/0!	0	0	#DIV/0!		0	0	#DIV/0!				#DIV/0!
		0	0	#DIV/0!	0	0	#DIV/0!		0	0	#DIV/0!				#DIV/0!
		0	0	#DIV/0!	0	0	#DIV/0!		0	0	#DIV/0!				#DIV/0!
		0	0	#DIV/0!	0	0	#DIV/0!		0	0	#DIV/0!				#DIV/0!
		0	0	#DIV/0!	0	0	#DIV/0!		0	0	#DIV/0!				#DIV/0!
		0	0	#DIV/0!	0	0	#DIV/0!		0	0	#DIV/0!				#DIV/0!
		0	0	#DIV/0!	0	0	#DIV/0!		0	0	#DIV/0!				#DIV/0!
		0	0	#DIV/0!	0	0	#DIV/0!		0	0	#DIV/0!				#DIV/0!
		0	0	#DIV/0!	0	0	#DIV/0!		0	0	#DIV/0!				#DIV/0!
		0	0	#DIV/0!	0	0	#DIV/0!		0	0	#DIV/0!				#DIV/0!
		0	0	#DIV/0!	0	0	#DIV/0!		0	0	#DIV/0!				#DIV/0!
		0	0	#DIV/0!	0	0	#DIV/0!		0	0	#DIV/0!				#DIV/0!
		0	0	#DIV/0!	0	0	#DIV/0!		0	0	#DIV/0!				#DIV/0!
		0	0	#DIV/0!	0	0	#DIV/0!		0	0	#DIV/0!				#DIV/0!
		0	0	#DIV/0!	0	0	#DIV/0!		0	0	#DIV/0!				#DIV/0!
		0	0	#DIV/0!	0	0	#DIV/0!		0	0	#DIV/0!				#DIV/0!
		0	0	#DIV/0!	0	0	#DIV/0!		0	0	#DIV/0!				#DIV/0!
		0	0	#DIV/0!	0	0	#DIV/0!		0	0	#DIV/0!				#DIV/0!
		0	0	#DIV/0!	0	0	#DIV/0!		0	0	#DIV/0!				#DIV/0!
		0	0	#DIV/0!	0	0	#DIV/0!		0	0	#DIV/0!				#DIV/0!
		0	0	#DIV/0!	0	0	#DIV/0!		0	0	#DIV/0!				#DIV/0!
		0	0	#DIV/0!	0	0	#DIV/0!		0	0	#DIV/0!				#DIV/0!
		0	0	#DIV/0!	0	0	#DIV/0!		0	0	#DIV/0!				#DIV/0!
		0	0	#DIV/0!	0	0	#DIV/0!		0	0	#DIV/0!				#DIV/0!
		0	0	#DIV/0!	0	0	#DIV/0!		0	0	#DIV/0!				#DIV/0!
		0	0	#DIV/0!	0	0	#DIV/0!		0	0	#DIV/0!				#DIV/0!
		0	0	#DIV/0!	0	0	#DIV/0!		0	0	#DIV/0!				#DIV/0!
		0	0	#DIV/0!	0	0	#DIV/0!		0	0	#DIV/0!				#DIV/0!
		0	0	#DIV/0!	0	0	#DIV/0!		0	0	#DIV/0!				#DIV/0!
		0	0	#DIV/0!	0	0	#DIV/0!		0	0	#DIV/0!				#DIV/0!
		0	0	#DIV/0!	0	0	#DIV/0!		0	0	#DIV/0!				#DIV/0!
		0	0	#DIV/0!	0	0	#DIV/0!		0	0	#DIV/0!				#DIV/0!
		0	0	#DIV/0!	0	0	#DIV/0!		0	0	#DIV/0!				#DIV/0!
		0	0	#DIV/0!	0	0	#DIV/0!		0	0	#DIV/0!				#DIV/0!
		0	0	#DIV/0!	0	0	#DIV/0!		0	0	#DIV/0!				#DIV/0!
		0	0	#DIV/0!	0	0	#DIV/0!		0	0	#DIV/0!				#DIV/0!
		0	0	#DIV/0!	0	0	#DIV/0!		0	0	#DIV/0!				#DIV/0!
		0	0	#DIV/0!	0	0	#DIV/0!		0	0	#DIV/0!				#DIV/0!
		0	0	#DIV/0!	0	0	#DIV/0!		0	0	#DIV/0!				#DIV/0!
		0	0	#DIV/0!	0	0	#DIV/0!		0	0	#DIV/0!				#DIV/0!
		0	0	#DIV/0!	0	0	#DIV/0!		0	0	#DIV/0!				#DIV/0!
		0	0	#DIV/0!	0	0	#DIV/0!		0	0	#DIV/0!				#DIV/0!
		0	0	#DIV/0!	0	0	#DIV/0!		0	0	#DIV/0!				#DIV/0!
		0	0	#DIV/0!	0	0	#DIV/0!		0	0	#DIV/0!				#DIV/0!
		0	0	#DIV/0!	0	0	#DIV/0!		0	0	#DIV/0!				#DIV/0!
		0	0	#DIV/0!	0	0	#DIV/0!		0	0	#DIV/0!				#DIV/0!
		0	0	#DIV/0!	0	0	#DIV/0!		0	0	#DIV/0!				#DIV/0!
		0	0	#DIV/0!	0	0	#DIV/0!		0	0	#DIV/0!				#DIV/0!
		0	0	#DIV/0!	0	0	#DIV/0!		0	0	#DIV/0!				#DIV/0!
		0	0	#DIV/0!	0	0	#DIV/0!		0	0	#DIV/0!				#DIV/0!
		0	0	#DIV/0!	0	0	#DIV/0!		0	0	#DIV/0!				#DIV/0!
		0	0	#DIV/0!	0	0	#DIV/0!		0	0	#DIV/0!				#DIV/0!
		0	0	#DIV/0!	0	0	#DIV/0!		0	0	#DIV/0!				#DIV/0!
		0	0	#DIV/0!	0	0	#DIV/0!		0	0	#DIV/0!				#DIV/0!
		0	0	#DIV/0!	0	0	#DIV/0!		0	0	#DIV/0!				#DIV/0!
		0	0	#DIV/0!	0	0	#DIV/0!		0	0	#DIV/0!				#DIV/0!
		0	0	#DIV/0!	0	0	#DIV/0!		0	0	#DIV/0!				#DIV/0!
		0	0	#DIV/0!	0	0	#DIV/0!		0	0	#DIV/0!				#DIV/0!
		0	0	#DIV/0!	0	0	#DIV/0!		0	0	#DIV/0!				#DIV/0!
		0	0	#DIV/0!	0	0	#DIV/0!		0	0	#DIV/0!				#DIV/0!
		0	0	#DIV/0!	0	0	#DIV/0!		0	0	#DIV/0!				#DIV/0!
		0	0	#DIV/0!	0	0	#DIV/0!		0	0	#DIV/0!				#DIV/0!
		0	0	#DIV/0!	0	0	#DIV/0!		0	0	#DIV/0!				#DIV/0!
		0	0	#DIV/0!	0	0	#DIV/0!		0	0	#DIV/0!				#DIV/0!
		0	0	#DIV/0!	0	0	#DIV/0!		0	0	#DIV/0!				#DIV/0!
		0	0	#DIV/0!	0	0	#DIV/0!		0	0	#DIV/0!				#DIV/0!
		0	0	#DIV/0!	0	0	#DIV/0!		0	0	#DIV/0!				#DIV/0!
		0	0	#DIV/0!	0	0	#DIV/0!		0	0	#DIV/0!				#DIV/0!
		0	0	#DIV/0!	0	0	#DIV/0!		0	0	#DIV/0!				#DIV/0!
		0	0	#DIV/0!	0	0	#DIV/0!		0	0	#DIV/0!				#DIV/0!
		0	0	#DIV/0!	0	0	#DIV/0!		0	0	#DIV/0!				#DIV/0!
		0	0	#DIV/0!	0	0	#DIV/0!		0	0	#DIV/0!				#DIV/0!
		0	0	#DIV/0!	0	0	#DIV/0!		0	0	#DIV/0!				#DIV/0!
		0	0	#DIV/0!	0	0	#DIV/0!		0	0	#DIV/0!				#DIV/0!
		0	0	#DIV/0!	0	0	#DIV/0!		0	0	#DIV/0!				#DIV/0!
		0	0	#DIV/0!	0	0	#DIV/0!		0	0	#DIV/0!				#DIV/0!
		0	0	#DIV/0!	0	0	#DIV/0!		0	0	#DIV/0!				#DIV/0!
		0	0	#DIV/0!	0	0	#DIV/0!		0	0	#DIV/0!				#DIV/0!
		0	0	#DIV/0!	0	0	#DIV/0!		0	0	#DIV/0!				#DIV/0!
		0	0	#DIV/0!	0	0	#DIV/0!		0	0	#DIV/0!				#DIV/0!
		0	0	#DIV/0!	0	0	#DIV/0!		0	0	#DIV/0!				#DIV/0!
		0	0	#DIV/0!	0	0	#DIV/0!		0	0	#DIV/0!				#DIV/0!
		0	0	#DIV/0!	0	0	#DIV/0!		0	0	#DIV/0!				#DIV/0!
		0	0	#DIV/0!	0	0	#DIV/0!		0	0	#DIV/0!				#DIV/0!
		0	0	#DIV/0!	0	0	#DIV/0!		0	0	#DIV/0!				#DIV/0!
		0	0	#DIV/0!	0	0	#DIV/0!		0	0	#DIV/0!				#DIV/0!
		0	0	#DIV/0!	0	0	#DIV/0!		0	0	#DIV/0!				#DIV/0!
		0	0	#DIV/0!	0	0	#DIV/0!		0	0	#DIV/0!				#DIV/0!
		0	0	#DIV/0!	0	0	#DIV/0!		0	0	#DIV/0!				#DIV/0!
		0	0	#DIV/0!	0	0	#DIV/0!		0	0	#DIV/0!				#DIV/0!
		0	0	#DIV/0!	0	0	#DIV/0!		0	0	#DIV/0!				#DIV/0!
		0	0	#DIV/0!	0	0	#DIV/0!		0	0	#DIV/0!				#DIV/0!
		0	0	#DIV/0!	0	0	#DIV/0!		0	0	#DIV/0!				#DIV/0!
		0	0	#DIV/0!	0	0	#DIV/0!		0	0	#DIV/0!				#DIV/0!
		0	0	#DIV/0!	0	0	#DIV/0!		0	0	#DIV/0!				#DIV/0!
		0	0	#DIV/0!	0	0	#DIV/0!		0	0	#DIV/0!				#DIV/0!
		0	0	#DIV/0!	0	0	#DIV/0!		0	0	#DIV/0!				#DIV/0!
		0	0	#DIV/0!	0	0	#DIV/0!		0	0	#DIV/0!				#DIV/0!
		0	0	#DIV/0!	0	0	#DIV/0!		0	0	#DIV/0!				#DIV/0!
		0	0	#DIV/0!	0	0	#DIV/0!		0	0	#DIV/0!				#DIV/0!
		0	0	#DIV/0!	0	0	#DIV/0!		0	0	#DIV/0!				#DIV/0!
		0	0	#DIV/0!	0	0	#DIV/0!		0	0	#DIV/0!				#DIV/0!
		0	0	#DIV/0!	0	0	#DIV/0!		0	0	#DIV/0!				#DIV/0!
		0	0	#DIV/0!	0	0	#DIV/0!		0	0	#DIV/0!				#DIV/0!
		0	0	#DIV/0!	0	0	#DIV/0!		0	0	#DIV/0!				#DIV/0!
		0	0	#DIV/0!	0	0	#DIV/0!		0	0	#DIV/0!				#DIV/0!
		0	0	#DIV/0!	0	0	#DIV/0!		0	0	#DIV/0!				#DIV/0!
		0	0	#DIV/0!	0	0	#DIV/0!		0	0	#DIV/0!				#DIV/0!
		0	0	#DIV/0!	0	0	#DIV/0!		0	0	#DIV/0!				#DIV/0!
		0	0	#DIV/0!	0	0	#DIV/0!		0	0	#DIV/0!				#DIV/0!
		0	0	#DIV/0!	0	0	#DIV/0!		0	0	#DIV/0!				#DIV/0!
		0	0	#DIV/0!	0	0	#DIV/0!		0	0	#DIV/0!				#DIV/0!
		0	0	#DIV/0!	0	0	#DIV/0!		0	0	#DIV/0!				#DIV/0!
		0	0	#DIV/0!	0	0	#DIV/0!		0	0	#DIV/0!				#DIV/0!
		0	0	#DIV/0!	0	0	#DIV/0!		0	0	#DIV/0!				#DIV/0!
		0	0	#DIV/0!	0	0	#DIV/0!		0	0	#DIV/0!				#DIV/0!
		0	0	#DIV/0!	0	0	#DIV/0!		0	0	#DIV/0!				#DIV/0!
		0	0	#DIV/0!	0	0	#DIV/0!		0	0	#DIV/0!				#DIV/0!
		0	0	#DIV/0!	0	0	#DIV/0!		0	0	#DIV/0!				#DIV/0!
		0	0	#DIV/0!	0	0	#DIV/0!		0	0	#DIV/0!				#DIV/0!
		0	0	#DIV/0!	0	0	#DIV/0!		0	0	#DIV/0!				#DIV/0!
		0	0	#DIV/0!	0	0	#DIV/0!		0	0	#DIV/0!				#DIV/0!
		0	0	#DIV/0!	0	0	#DIV/0!		0	0	#DIV/0!				#DIV/0!
		0	0	#DIV/0!	0	0	#DIV/0!		0	0	#DIV/0!				#DIV/0!
		0	0	#DIV/0!	0	0	#DIV/0!		0	0	#DIV/0!				#DIV/0!
		0	0	#DIV/0!	0	0	#DIV/0!		0	0	#DIV/0!				#DIV/0!
		0	0	#DIV/0!	0	0	#DIV/0!		0	0	#DIV/0!				#DIV/0!
		0	0	#DIV/0!	0	0	#DIV/0!		0	0	#DIV/0!				#DIV/0!
		0	0	#DIV/0!	0	0	#DIV/0!		0	0	#DIV/0!				#DIV/0!
		0	0	#DIV/0!	0	0	#DIV/0!		0	0	#DIV/0!				#DIV/0!
		0	0	#DIV/0!	0	0	#DIV/0!		0	0	#DIV/0!				#DIV/0!
		0	0	#DIV/0!	0	0	#DIV/0!		0	0	#DIV/0!				#DIV/0!
		0	0	#DIV/0!	0	0	#DIV/0!		0	0	#DIV/0!				#DIV/0!
		0	0	#DIV/0!	0	0	#DIV/0!		0	0	#DIV/0!				#DIV/0!
		0	0	#DIV/0!	0	0	#DIV/0!		0	0	#DIV/0!				#DIV/0!
		0	0	#DIV/0!	0	0	#DIV/0!		0	0	#DIV/0!				#DIV/0!
		0	0	#DIV/0!	0	0	#DIV/0!		0	0	#DIV/0!				#DIV/0!
		0	0	#DIV/0!	0	0	#DIV/0!		0	0	#DIV/0!				#DIV/0!
		0	0	#DIV/0!	0	0	#DIV/0!		0	0	#DIV/0!				#DIV/0!
		0	0	#DIV/0!	0	0	#DIV/0!		0	0	#DIV/0!				#DIV/0!
		0	0	#DIV/0!	0	0	#DIV/0!		0	0	#DIV/0!				#DIV/0!
		0	0	#DIV/0!	0	0	#DIV/0!		0	0	#DIV/0!				#DIV/0!
		0	0	#DIV/0!	0	0	#DIV/0!		0	0	#DIV/0!				#DIV/0!
		0	0	#DIV/0!	0	0	#DIV/0!		0	0	#DIV/0!				#DIV/0!
		0	0	#DIV/0!	0	0	#DIV/0!		0	0	#DIV/0!				#DIV/0!
		0	0	#DIV/0!	0	0	#DIV/0!		0	0	#DIV/0!				#DIV/0!
		0	0	#DIV/0!	0	0	#DIV/0!		0	0	#DIV/0!				#DIV/0!
		0	0	#DIV/0!	0	0	#DIV/0!		0	0	#DIV/0!				#DIV/0!
		0	0	#DIV/0!	0	0	#DIV/0!		0	0	#DIV/0!				#DIV/0!
		0	0	#DIV/0!	0	0	#DIV/0!		0	0	#DIV/0!				#DIV/0!
		0	0	#DIV/0!	0	0	#DIV/0!		0	0	#DIV/0!				#DIV/0!
		0	0	#DIV/0!	0	0	#DIV/0!		0	0	#DIV/0!				#DIV/0!
		0	0	#DIV/0!	0	0	#DIV/0!		0	0	#DIV/0!				#DIV/0!
		0	0	#DIV/0!	0	0	#DIV/0!		0	0	#DIV/0!				#DIV/0!
		0	0	#DIV/0!	0	0	#DIV/0!		0	0	#DIV/0!				#DIV/0!
		0	0	#DIV/0!	0	0	#DIV/0!		0	0	#DIV/0!				#DIV/0!
		0	0	#DIV/0!	0	0	#DIV/0!		0	0	#DIV/0!				#DIV/0!
		0	0	#DIV/0!	0	0	#DIV/0!		0	0	#DIV/0!				#DIV/0!
		0	0	#DIV/0!	0	0	#DIV/0!		0	0	#DIV/0!				#DIV/0!
		0	0	#DIV/0!	0	0	#DIV/0!		0	0	#DIV/0!				#DIV/0!
		0	0	#DIV/0!	0	0	#DIV/0!		0	0	#DIV/0!				#DIV/0!
		0	0	#DIV/0!	0	0	#DIV/0!		0	0	#DIV/0!				#DIV/0!
		0	0	#DIV/0!	0	0	#DIV/0!		0	0	#DIV/0!				#DIV/0!
		0	0	#DIV/0!	0	0	#DIV/0!		0	0	#DIV/0!				#DIV/0!
		0	0	#DIV/0!	0	0	#DIV/0!		0	0	#DIV/0!				#DIV/0!
		0	0	#DIV/0!	0	0	#DIV/0!		0	0	#DIV/0!				#DIV/0!
		0	0	#DIV/0!	0	0	#DIV/0!		0	0	#DIV/0!				#DIV/0!
		0	0	#DIV/0!	0	0	#DIV/0!		0	0	#DIV/0!				#DIV/0!
		0	0	#DIV/0!	0	0	#DIV/0!		0	0	#DIV/0!				#DIV/0!
		0	0	#DIV/0!	0	0	#DIV/0!		0	0	#DIV/0!				#DIV/0!
		0	0	#DIV/0!	0	0	#DIV/0!		0	0	#DIV/0!				#DIV/0!
		0	0	#DIV/0!	0	0	#DIV/0!		0	0	#DIV/0!				#DIV/0!
		0	0	#DIV/0!	0	0	#DIV/0!		0	0	#DIV/0!				#DIV/0!
		0	0	#DIV/0!	0	0	#DIV/0!		0	0	#DIV/0!				#DIV/0!
		0	0	#DIV/0!	0	0	#DIV/0!		0	0	#DIV/0!				#DIV/0!
		0	0	#DIV/0!	0	0	#DIV/0!		0	0	#DIV/0!				#DIV/0!
		0	0	#DIV/0!	0	0	#DIV/0!		0	0	#DIV/0!				#DIV/0!
		0	0	#DIV/0!	0	0	#DIV/0!		0	0	#DIV/0!				#DIV/0!
		0	0	#DIV/0!	0	0	#DIV/0!		0	0	#DIV/0!				#DIV/0!
		0	0	#DIV/0!	0	0	#DIV/0!		0	0	#DIV/0!				#DIV/0!
		0	0	#DIV/0!	0	0	#DIV/0!		0	0	#DIV/0!				#DIV/0!
		0	0	#DIV/0!	0	0	#DIV/0!		0	0	#DIV/0!				#DIV/0!
		0	0	#DIV/0!	0	0	#DIV/0!		0	0	#DIV/0!				#DIV/0!
		0	0	#DIV/0!	0	0	#DIV/0!		0	0	#DIV/0!				#DIV/0!
		0	0	#DIV/0!	0	0	#DIV/0!		0	0	#DIV/0!				#DIV/0!
		0	0	#DIV/0!	0	0	#DIV/0!		0	0	#DIV/0!				#DIV/0!
		0	0	#DIV/0!	0	0	#DIV/0!		0	0	#DIV/0!				#DIV/0!
		0	0	#DIV/0!	0	0	#DIV/0!		0	0	#DIV/0!				#DIV/0!
		0	0	#DIV/0!	0	0	#DIV/0!		0	0	#DIV/0!				#DIV/0!
		0	0	#DIV/0!	0	0	#DIV/0!		0	0	#DIV/0!				#DIV/0!
		0	0	#DIV/0!	0	0	#DIV/0!		0	0	#DIV/0!				#DIV/0!
		0	0	#DIV/0!	0	0	#DIV/0!		0	0	#DIV/0!				#DIV/0!
		0	0	#DIV/0!	0	0	#DIV/0!		0	0	#DIV/0!				#DIV/0!
		0	0	#DIV/0!	0	0	#DIV/0!		0	0	#DIV/0!				#DIV/0!
		0	0	#DIV/0!	0	0	#DIV/0!		0	0	#DIV/0!				#DIV/0!
		0	0	#DIV/0!	0	0	#DIV/0!		0	0	#DIV/0!				#DIV/0!
		0	0	#DIV/0!	0	0	#DIV/0!		0	0	#DIV/0!				#DIV/0!
		0	0	#DIV/0!	0	0	#DIV/0!		0	0	#DIV/0!				#DIV/0!
		0	0	#DIV/0!	0	0	#DIV/0!		0	0	#DIV/0!				#DIV/0!
		0	0	#DIV/0!	0	0	#DIV/0!		0	0	#DIV/0!				#DIV/0!
		0	0	#DIV/0!	0	0	#DIV/0!		0	0	#DIV/0!				#DIV/0!
		0	0	#DIV/0!	0	0	#DIV/0!		0	0	#DIV/0!				#DIV/0!
		0	0	#DIV/0!	0	0	#DIV/0!		0	0	#DIV/0!				#DIV/0!
		0	0	#DIV/0!	0	0	#DIV/0!		0	0	#DIV/0!				#DIV/0!
		0	0	#DIV/0!	0	0	#DIV/0!		0	0	#DIV/0!				#DIV/0!
		0	0	#DIV/0!	0	0	#DIV/0!		0	0	#DIV/0!				#DIV/0!
		0	0	#DIV/0!	0	0	#DIV/0!		0	0	#DIV/0!				#DIV/0!
		0	0	#DIV/0!	0	0	#DIV/0!		0	0	#DIV/0!				#DIV/0!
		0	0	#DIV/0!	0	0	#DIV/0!		0	0	#DIV/0!				#DIV/0!
		0	0	#DIV/0!	0	0	#DIV/0!		0	0	#DIV/0!				#DIV/0!
		0	0	#DIV/0!	0	0	#DIV/0!		0	0	#DIV/0!				#DIV/0!
		0	0	#DIV/0!	0	0	#DIV/0!		0	0	#DIV/0!				#DIV/0!
		0	0	#DIV/0!	0	0	#DIV/0!		0	0	#DIV/0!				#DIV/0!
		0	0	#DIV/0!	0	0	#DIV/0!		0	0	#DIV/0!				#DIV/0!
		0	0	#DIV/0!	0	0	#DIV/0!		0	0	#DIV/0!				#DIV/0!
		0	0	#DIV/0!	0	0	#DIV/0!		0	0	#DIV/0!				#DIV/0!
		0	0	#DIV/0!	0	0	#DIV/0!		0	0	#DIV/0!				#DIV/0!
		0	0	#DIV/0!	0	0	#DIV/0!		0	0	#DIV/0!				#DIV/0!
		0	0	#DIV/0!	0	0	#DIV/0!		0	0	#DIV/0!				#DIV/0!
		0	0	#DIV/0!	0	0	#DIV/0!		0	0	#DIV/0!				#DIV/0!
		0	0	#DIV/0!	0	0	#DIV/0!		0	0	#DIV/0!				#DIV/0!
		0	0	#DIV/0!	0	0	#DIV/0!		0	0	#DIV/0!				#DIV/0!
		0	0	#DIV/0!	0	0	#DIV/0!		0	0	#DIV/0!				#DIV/0!
		0	0	#DIV/0!	0	0	#DIV/0!		0	0	#DIV/0!				#DIV/0!
		0	0	#DIV/0!	0	0	#DIV/0!		0	0	#DIV/0!				#DIV/0!
		0	0	#DIV/0!	0	0	#DIV/0!		0	0	#DIV/0!				#DIV/0!
		0	0	#DIV/0!	0	0	#DIV/0!		0	0	#DIV/0!				#DIV/0!
		0	0	#DIV/0!	0	0	#DIV/0!		0	0	#DIV/0!				#DIV/0!
		0	0	#DIV/0!	0	0	#DIV/0!		0	0	#DIV/0!				#DIV/0!
		0	0	#DIV/0!	0	0	#DIV/0!		0	0	#DIV/0!				#DIV/0!
		0	0	#DIV/0!	0	0	#DIV/0!		0	0	#DIV/0!				#DIV/0!
		0	0	#DIV/0!	0	0	#DIV/0!		0	0	#DIV/0!				#DIV/0!
		0	0	#DIV/0!	0	0	#DIV/0!		0	0	#DIV/0!				#DIV/0!
		0	0	#DIV/0!	0	0	#DIV/0!		0	0	#DIV/0!				#DIV/0!
		0	0	#DIV/0!	0	0	#DIV/0!		0	0	#DIV/0!				#DIV/0!
		0	0	#DIV/0!	0	0	#DIV/0!		0	0	#DIV/0!				#DIV/0!
		0	0	#DIV/0!	0	0	#DIV/0!		0	0	#DIV/0!				#DIV/0!
		0	0	#DIV/0!	0	0	#DIV/0!		0	0	#DIV/0!				#DIV/0!
		0	0	#DIV/0!	0	0	#DIV/0!		0	0	#DIV/0!				#DIV/0!
		0	0	#DIV/0!	0	0	#DIV/0!		0	0	#DIV/0!				#DIV/0!
		0	0	#DIV/0!	0	0	#DIV/0!		0	0	#DIV/0!				#DIV/0!
		0	0	#DIV/0!	0	0	#DIV/0!		0	0	#DIV/0!				#DIV/0!
		0	0	#DIV/0!	0	0	#DIV/0!		0	0	#DIV/0!				#DIV/0!
		0	0	#DIV/0!	0	0	#DIV/0!		0	0	#DIV/0!				#DIV/0!
		0	0	#DIV/0!	0	0	#DIV/0!		0	0	#DIV/0!				#DIV/0!
		0	0	#DIV/0!	0	0	#DIV/0!		0	0	#DIV/0!				#DIV/0!
		0	0	#DIV/0!	0	0	#DIV/0!		0	0	#DIV/0!				#DIV/0!
		0	0	#DIV/0!	0	0	#DIV/0!		0	0	#DIV/0!				#DIV/0!
		0	0	#DIV/0!	0	0	#DIV/0!		0	0	#DIV/0!				#DIV/0!
		0	0	#DIV/0!	0	0	#DIV/0!		0	0	#DIV/0!				#DIV/0!
		0	0	#DIV/0!	0	0	#DIV/0!		0	0	#DIV/0!				#DIV/0!
		0	0	#DIV/0!	0	0	#DIV/0!		0	0	#DIV/0!				#DIV/0!
		0	0	#DIV/0!	0	0	#DIV/0!		0	0	#DIV/0!				#DIV/0!
		0	0	#DIV/0!	0	0	#DIV/0!		0	0	#DIV/0!				#DIV/0!
		0	0	#DIV/0!	0	0	#DIV/0!		0	0	#DIV/0!				#DIV/0!
		0	0	#DIV/0!	0	0	#DIV/0!		0	0	#DIV/0!				#DIV/0!
		0	0	#DIV/0!	0	0	#DIV/0!		0	0	#DIV/0!				#DIV/0!
		0	0	#DIV/0!	0	0	#DIV/0!		0	0	#DIV/0!				#DIV/0!
		0	0	#DIV/0!	0	0	#DIV/0!		0	0	#DIV/0!				#DIV/0!
		0	0	#DIV/0!	0	0	#DIV/0!		0	0	#DIV/0!				#DIV/0!
		0	0	#DIV/0!	0	0	#DIV/0!		0	0	#DIV/0!				#DIV/0!
		0	0	#DIV/0!	0	0	#DIV/0!		0	0	#DIV/0!				#DIV/0!
		0	0	#DIV/0!	0	0	#DIV/0!		0	0	#DIV/0!				#DIV/0!
		0	0	#DIV/0!	0	0	#DIV/0!		0	0	#DIV/0!				#DIV/0!
		0	0	#DIV/0!	0	0	#DIV/0!		0	0	#DIV/0!				#DIV/0!
		0	0	#DIV/0!	0	0	#DIV/0!		0	0	#DIV/0!				#DIV/0!
		0	0	#DIV/0!	0	0	#DIV/0!		0	0	#DIV/0!				#DIV/0!
		0	0	#DIV/0!	0	0	#DIV/0!		0	0	#DIV/0!				#DIV/0!
		0	0	#DIV/0!	0	0	#DIV/0!		0	0	#DIV/0!				#DIV/0!
		0	0	#DIV/0!	0	0	#DIV/0!		0	0	#DIV/0!				#DIV/0!
		0	0	#DIV/0!	0	0	#DIV/0!		0	0	#DIV/0!				#DIV/0!
		0	0	#DIV/0!	0	0	#DIV/0!		0	0	#DIV/0!				#DIV/0!
		0	0	#DIV/0!	0	0	#DIV/0!		0	0	#DIV/0!				#DIV/0!
		0	0	#DIV/0!	0	0	#DIV/0!		0	0	#DIV/0!				#DIV/0!
		0	0	#DIV/0!	0	0	#DIV/0!		0	0	#DIV/0!				#DIV/0!
		0	0	#DIV/0!	0	0	#DIV/0!		0	0	#DIV/0!				#DIV/0!
		0	0	#DIV/0!	0	0	#DIV/0!		0	0	#DIV/0!				#DIV/0!
		0	0	#DIV/0!	0	0	#DIV/0!		0	0	#DIV/0!				#DIV/0!
		0	0	#DIV/0!	0	0	#DIV/0!		0	0	#DIV/0!				#DIV/0!
		0	0	#DIV/0!	0	0	#DIV/0!		0	0	#DIV/0!				#DIV/0!
		0	0	#DIV/0!	0	0	#DIV/0!		0	0	#DIV/0!				#DIV/0!
		0	0	#DIV/0!	0	0	#DIV/0!		0	0	#DIV/0!				#DIV/0!
		0	0	#DIV/0!	0	0	#DIV/0!		0	0	#DIV/0!				#DIV/0!
		0	0	#DIV/0!	0	0	#DIV/0!		0	0	#DIV/0!				#DIV/0!
		0	0	#DIV/0!	0	0	#DIV/0!		0	0	#DIV/0!				#DIV/0!
		0	0	#DIV/0!	0	0	#DIV/0!		0	0	#DIV/0!				#DIV/0!
		0	0	#DIV/0!	0	0	#DIV/0!		0	0	#DIV/0!				#DIV/0!
		0	0	#DIV/0!	0	0	#DIV/0!		0	0	#DIV/0!				#DIV/0!
		0	0	#DIV/0!	0	0	#DIV/0!		0	0	#DIV/0!				#DIV/0!
		0	0	#DIV/0!	0	0	#DIV/0!		0	0	#DIV/0!				#DIV/0!
		0	0	#DIV/0!	0	0	#DIV/0!		0	0	#DIV/0!				#DIV/0!
		0	0	#DIV/0!	0	0	#DIV/0!		0	0	#DIV/0!				#DIV/0!
		0	0	#DIV/0!	0	0	#DIV/0!		0	0	#DIV/0!				#DIV/0!
		0	0	#DIV/0!	0	0	#DIV/0!		0	0	#DIV/0!				#DIV/0!
		0	0	#DIV/0!	0	0	#DIV/0!		0	0	#DIV/0!				#DIV/0!
		0	0	#DIV/0!	0	0	#DIV/0!		0	0	#DIV/0!				#DIV/0!
		0	0	#DIV/0!	0	0	#DIV/0!		0	0	#DIV/0!				#DIV/0!
		0	0	#DIV/0!	0	0	#DIV/0!		0	0	#DIV/0!				#DIV/0!
		0	0	#DIV/0!	0	0	#DIV/0!		0	0	#DIV/0!				#DIV/0!
		0	0	#DIV/0!	0	0	#DIV/0!		0	0	#DIV/0!				#DIV/0!
		0	0	#DIV/0!	0	0	#DIV/0!		0	0	#DIV/0!				#DIV/0!
		0	0	#DIV/0!	0	0	#DIV/0!		0	0	#DIV/0!				#DIV/0!
		0	0	#DIV/0!	0	0	#DIV/0!		0	0	#DIV/0!				#DIV/0!
		0	0	#DIV/0!	0	0	#DIV/0!		0	0	#DIV/0!				#DIV/0!
		0	0	#DIV/0!	0	0	#DIV/0!		0	0	#DIV/0!				#DIV/0!
		0	0	#DIV/0!	0	0	#DIV/0!		0	0	#DIV/0!				#DIV/0!
		0	0	#DIV/0!	0	0	#DIV/0!		0	0	#DIV/0!				#DIV/0!
		0	0	#DIV/0!	0	0	#DIV/0!		0	0	#DIV/0!				#DIV/0!
		0	0	#DIV/0!	0	0	#DIV/0!		0	0	#DIV/0!				#DIV/0!
		0	0	#DIV/0!	0	0	#DIV/0!		0	0	#DIV/0!				#DIV/0!
		0	0	#DIV/0!	0	0	#DIV/0!		0	0	#DIV/0!				#DIV/0!
		0	0	#DIV/0!	0	0	#DIV/0!		0	0	#DIV/0!				#DIV/0!
		0	0	#DIV/0!	0	0	#DIV/0!		0	0	#DIV/0!				#DIV/0!
		0	0	#DIV/0!	0	0	#DIV/0!		0	0	#DIV/0!				#DIV/0!
		0	0	#DIV/0!	0	0	#DIV/0!		0	0	#DIV/0!				#DIV/0!
		0	0	#DIV/0!	0	0	#DIV/0!		0	0	#DIV/0!				#DIV/0!
		0	0	#DIV/0!	0	0	#DIV/0!		0	0	#DIV/0!				#DIV/0!
		0	0	#DIV/0!	0	0	#DIV/0!		0	0	#DIV/0!				#DIV/0!
		0	0	#DIV/0!	0	0	#DIV/0!		0	0	#DIV/0!				#DIV/0!
		0	0	#DIV/0!	0	0	#DIV/0!		0	0	#DIV/0!				#DIV/0!
		0	0	#DIV/0!	0	0	#DIV/0!		0	0	#DIV/0!				#DIV/0!
		0	0	#DIV/0!	0	0	#DIV/0!		0	0	#DIV/0!				#DIV/0!
		0	0	#DIV/0!	0	0	#DIV/0!		0	0	#DIV/0!				#DIV/0!
		0	0	#DIV/0!	0	0	#DIV/0!		0	0	#DIV/0!				#DIV/0!
		0	0	#DIV/0!	0	0	#DIV/0!		0	0	#DIV/0!				#DIV/0!
		0	0	#DIV/0!	0	0	#DIV/0!		0	0	#DIV/0!				#DIV/0!
		0	0	#DIV/0!	0	0	#DIV/0!		0	0	#DIV/0!				#DIV/0!
		0	0	#DIV/0!	0	0	#DIV/0!		0	0	#DIV/0!				#DIV/0!
		0	0	#DIV/0!	0	0	#DIV/0!		0	0	#DIV/0!				#DIV/0!
		0	0	#DIV/0!	0	0	#DIV/0!		0	0	#DIV/0!				#DIV/0!
		0	0	#DIV/0!	0	0	#DIV/0!		0	0	#DIV/0!				#DIV/0!
		0	0	#DIV/0!	0	0	#DIV/0!		0	0	#DIV/0!				#DIV/0!
		0	0	#DIV/0!	0	0	#DIV/0!		0	0	#DIV/0!				#DIV/0!
		0	0	#DIV/0!	0	0	#DIV/0!		0	0	#DIV/0!				#DIV/0!
		0	0	#DIV/0!	0	0	#DIV/0!		0	0	#DIV/0!				#DIV/0!
		0	0	#DIV/0!	0	0	#DIV/0!		0	0	#DIV/0!				#DIV/0!
		0	0	#DIV/0!	0	0	#DIV/0!		0	0	#DIV/0!				#DIV/0!
		0	0	#DIV/0!	0	0	#DIV/0!		0	0	#DIV/0!				#DIV/0!
		0	0	#DIV/0!	0	0	#DIV/0!		0	0	#DIV/0!				#DIV/0!
		0	0	#DIV/0!	0	0	#DIV/0!		0	0	#DIV/0!				#DIV/0!
		0	0	#DIV/0!	0	0	#DIV/0!		0	0	#DIV/0!				#DIV/0!
		0	0	#DIV/0!	0	0	#DIV/0!		0	0	#DIV/0!				#DIV/0!
		0	0	#DIV/0!	0	0	#DIV/0!		0	0	#DIV/0!				#DIV/0!
		0	0	#DIV/0!	0	0	#DIV/0!		0	0	#DIV/0!				#DIV/0!
		0	0	#DIV/0!	0	0	#DIV/0!		0	0	#DIV/0!				#DIV/0!
		0	0	#DIV/0!	0	0	#DIV/0!		0	0	#DIV/0!				#DIV/0!
		0	0	#DIV/0!	0	0	#DIV/0!		0	0	#DIV/0!				#DIV/0!
		0	0	#DIV/0!	0	0	#DIV/0!		0	0	#DIV/0!				#DIV/0!
		0	0	#DIV/0!	0	0	#DIV/0!		0	0	#DIV/0!				#DIV/0!
		0	0	#DIV/0!	0	0	#DIV/0!		0	0	#DIV/0!				#DIV/0!
		0	0	#DIV/0!	0	0	#DIV/0!		0	0	#DIV/0!				#DIV/0!
		0	0	#DIV/0!	0	0	#DIV/0!		0	0	#DIV/0!				#DIV/0!
		0	0	#DIV/0!	0	0	#DIV/0!		0	0	#DIV/0!				#DIV/0!
		0	0	#DIV/0!	0	0	#DIV/0!		0	0	#DIV/0!				#DIV/0!
		0	0	#DIV/0!	0	0	#DIV/0!		0	0	#DIV/0!				#DIV/0!
		0	0	#DIV/0!	0	0	#DIV/0!		0	0	#DIV/0!				#DIV/0!
		0	0	#DIV/0!	0	0	#DIV/0!		0	0	#DIV/0!				#DIV/0!
		0	0	#DIV/0!	0	0	#DIV/0!		0	0	#DIV/0!				#DIV/0!
		0	0	#DIV/0!	0	0	#DIV/0!		0	0	#DIV/0!				#DIV/0!
		0	0	#DIV/0!	0	0	#DIV/0!		0	0	#DIV/0!				#DIV/0!
		0	0	#DIV/0!	0	0	#DIV/0!		0	0	#DIV/0!				#DIV/0!
		0	0	#DIV/0!	0	0	#DIV/0!		0	0	#DIV/0!				#DIV/0!
		0	0	#DIV/0!	0	0	#DIV/0!		0	0	#DIV/0!				#DIV/0!
		0	0	#DIV/0!	0	0	#DIV/0!		0	0	#DIV/0!				#DIV/0!
		0	0	#DIV/0!	0	0	#DIV/0!		0	0	#DIV/0!				#DIV/0!
		0	0	#DIV/0!	0	0	#DIV/0!		0	0	#DIV/0!				#DIV/0!
		0	0	#DIV/0!	0	0	#DIV/0!		0	0	#DIV/0!				#DIV/0!
		0	0	#DIV/0!	0	0	#DIV/0!		0	0	#DIV/0!				#DIV/0!
		0	0	#DIV/0!	0	0	#DIV/0!		0	0	#DIV/0!				#DIV/0!
		0	0	#DIV/0!	0	0	#DIV/0!		0	0	#DIV/0!				#DIV/0!
		0	0	#DIV/0!	0	0	#DIV/0!		0	0	#DIV/0!				#DIV/0!
		0	0	#DIV/0!	0	0	#DIV/0!		0	0	#DIV/0!				#DIV/0!
		0	0	#DIV/0!	0	0	#DIV/0!		0	0	#DIV/0!				#DIV/0!
		0	0	#DIV/0!	0	0	#DIV/0!		0	0	#DIV/0!				#DIV/0!
		0	0	#DIV/0!	0	0	#DIV/0!		0	0	#DIV/0!				#DIV/0!
		0	0	#DIV/0!	0	0	#DIV/0!		0	0	#DIV/0!				#DIV/0!
		0	0	#DIV/0!	0	0	#DIV/0!		0	0	#DIV/0!				#DIV/0!
		0	0	#DIV/0!	0	0	#DIV/0!		0	0	#DIV/0!				#DIV/0!
		0	0	#DIV/0!	0	0	#DIV/0!		0	0	#DIV/0!				#DIV/0!
		0	0	#DIV/0!	0	0	#DIV/0!		0	0	#DIV/0!				#DIV/0!
		0	0	#DIV/0!	0	0	#DIV/0!		0	0	#DIV/0!				#DIV/0!
		0	0	#DIV/0!	0	0	#DIV/0!		0	0	#DIV/0!				#DIV/0!
		0	0	#DIV/0!	0	0	#DIV/0!		0	0	#DIV/0!				#DIV/0!
		0	0	#DIV/0!	0	0	#DIV/0!		0	0	#DIV/0!				#DIV/0!
		0	0	#DIV/0!	0	0	#DIV/0!		0	0	#DIV/0!				#DIV/0!
		0	0	#DIV/0!	0	0	#DIV/0!		0	0	#DIV/0!				#DIV/0!
		0	0	#DIV/0!	0	0	#DIV/0!		0	0	#DIV/0!				#DIV/0!
		0	0	#DIV/0!	0	0	#DIV/0!		0	0	#DIV/0!				#DIV/0!
		0	0	#DIV/0!	0	0	#DIV/0!		0	0	#DIV/0!				#DIV/0!
		0	0	#DIV/0!	0	0	#DIV/0!		0	0	#DIV/0!				#DIV/0!
		0	0	#DIV/0!	0	0	#DIV/0!		0	0	#DIV/0!				#DIV/0!
		0	0	#DIV/0!	0	0	#DIV/0!		0	0	#DIV/0!				#DIV/0!
		0	0	#DIV/0!	0	0	#DIV/0!		0	0	#DIV/0!				#DIV/0!
		0	0	#DIV/0!	0	0	#DIV/0!		0	0	#DIV/0!				#DIV/0!
		0	0	#DIV/0!	0	0	#DIV/0!		0	0	#DIV/0!				#DIV/0!
		0	0	#DIV/0!	0	0	#DIV/0!		0	0	#DIV/0!				#DIV/0!
		0	0	#DIV/0!	0	0	#DIV/0!		0	0	#DIV/0!				#DIV/0!
		0	0	#DIV/0!	0	0	#DIV/0!		0	0	#DIV/0!				#DIV/0!
		0	0	#DIV/0!	0	0	#DIV/0!		0	0	#DIV/0!				#DIV/0!
		0	0	#DIV/0!	0	0	#DIV/0!		0	0	#DIV/0!				#DIV/0!
		0	0	#DIV/0!	0	0	#DIV/0!		0	0	#DIV/0!				#DIV/0!
		0	0	#DIV/0!	0	0	#DIV/0!		0	0	#DIV/0!				#DIV/0!
		0	0	#DIV/0!	0	0	#DIV/0!		0	0	#DIV/0!				#DIV/0!
		0	0	#DIV/0!	0	0	#DIV/0!		0	0	#DIV/0!				#DIV/0!
		0	0	#DIV/0!	0	0	#DIV/0!		0	0	#DIV/0!				#DIV/0!
		0	0	#DIV/0!	0	0	#DIV/0!		0	0	#DIV/0!				#DIV/0!
		0	0	#DIV/0!	0	0	#DIV/0!		0	0	#DIV/0!				#DIV/0!
		0	0	#DIV/0!	0	0	#DIV/0!		0	0	#DIV/0!				#DIV/0!
		0	0	#DIV/0!	0	0	#DIV/0!		0	0	#DIV/0!				#DIV/0!
		0	0	#DIV/0!	0	0	#DIV/0!		0	0	#DIV/0!				#DIV/0!
		0	0	#DIV/0!	0	0	#DIV/0!		0	0	#DIV/0!				#DIV/0!
		0	0	#DIV/0!	0	0	#DIV/0!		0	0	#DIV/0!				#DIV/0!
		0	0	#DIV/0!	0	0	#DIV/0!		0	0	#DIV/0!				#DIV/0!
		0	0	#DIV/0!	0	0	#DIV/0!		0	0	#DIV/0!				#DIV/0!
		0	0	#DIV/0!	0	0	#DIV/0!		0	0	#DIV/0!				#DIV/0!
		0	0	#DIV/0!	0	0	#DIV/0!		0	0	#DIV/0!				#DIV/0!
		0	0	#DIV/0!	0	0	#DIV/0!		0	0	#DIV/0!				#DIV/0!
		0	0	#DIV/0!	0	0	#DIV/0!		0	0	#DIV/0!				#DIV/0!
		0	0	#DIV/0!	0	0	#DIV/0!		0	0	#DIV/0!				#DIV/0!
		0	0	#DIV/0!	0	0	#DIV/0!		0	0	#DIV/0!				#DIV/0!
		0	0	#DIV/0!	0	0	#DIV/0!		0	0	#DIV/0!				#DIV/0!
		0	0	#DIV/0!	0	0	#DIV/0!		0	0	#DIV/0!				#DIV/0!
		0	0	#DIV/0!	0	0	#DIV/0!		0	0	#DIV/0!				#DIV/0!
		0	0	#DIV/0!	0	0	#DIV/0!		0	0	#DIV/0!				#DIV/0!
		0	0	#DIV/0!	0	0	#DIV/0!		0	0	#DIV/0!				#DIV/0!
		0	0	#DIV/0!	0	0	#DIV/0!		0	0	#DIV/0!				#DIV/0!
		0	0	#DIV/0!	0	0	#DIV/0!		0	0	#DIV/0!				#DIV/0!
		0	0	#DIV/0!	0	0	#DIV/0!		0	0	#DIV/0!				#DIV/0!
		0	0	#DIV/0!	0	0	#DIV/0!		0	0	#DIV/0!				#DIV/0!
		0	0	#DIV/0!	0	0	#DIV/0!		0	0	#DIV/0!				#DIV/0!
		0	0	#DIV/0!	0	0	#DIV/0!		0	0	#DIV/0!				#DIV/0!
		0	0	#DIV/0!	0	0	#DIV/0!		0	0	#DIV/0!				#DIV/0!
		0	0	#DIV/0!	0	0	#DIV/0!		0	0	#DIV/0!				#DIV/0!
		0	0	#DIV/0!	0	0	#DIV/0!		0	0	#DIV/0!				#DIV/0!
		0	0	#DIV/0!	0	0	#DIV/0!		0	0	#DIV/0!				#DIV/0!
		0	0	#DIV/0!	0	0	#DIV/0!		0	0	#DIV/0!				#DIV/0!
		0	0	#DIV/0!	0	0	#DIV/0!		0	0	#DIV/0!				#DIV/0!
		0	0	#DIV/0!	0	0	#DIV/0!		0	0	#DIV/0!				#DIV/0!
		0	0	#DIV/0!	0	0	#DIV/0!		0	0	#DIV/0!				#DIV/0!
		0	0	#DIV/0!	0	0	#DIV/0!		0	0	#DIV/0!				#DIV/0!
		0	0	#DIV/0!	0	0	#DIV/0!		0	0	#DIV/0!				#DIV/0!
		0	0	#DIV/0!	0	0	#DIV/0!		0	0	#DIV/0!				#DIV/0!
		0	0	#DIV/0!	0	0	#DIV/0!		0	0	#DIV/0!				#DIV/0!
		0	0	#DIV/0!	0	0	#DIV/0!		0	0	#DIV/0!				#DIV/0!
		0	0	#DIV/0!	0	0	#DIV/0!		0	0	#DIV/0!				#DIV/0!
		0	0	#DIV/0!	0	0	#DIV/0!		0	0	#DIV/0!				#DIV/0!
		0	0	#DIV/0!	0	0	#DIV/0!		0	0	#DIV/0!				#DIV/0!
		0	0	#DIV/0!	0	0	#DIV/0!		0	0	#DIV/0!				#DIV/0!
		0	0	#DIV/0!	0	0	#DIV/0!		0	0	#DIV/0!				#DIV/0!
		0	0	#DIV/0!	0	0	#DIV/0!		0	0	#DIV/0!				#DIV/0!
		0	0	#DIV/0!	0	0	#DIV/0!		0	0	#DIV/0!				#DIV/0!
		0	0	#DIV/0!	0	0	#DIV/0!		0	0	#DIV/0!				#DIV/0!
		0	0	#DIV/0!	0	0	#DIV/0!		0	0	#DIV/0!				#DIV/0!
		0	0	#DIV/0!	0	0	#DIV/0!		0	0	#DIV/0!				#DIV/0!
		0	0	#DIV/0!	0	0	#DIV/0!		0	0	#DIV/0!				#DIV/0!
		0	0	#DIV/0!	0	0	#DIV/0!		0	0	#DIV/0!				#DIV/0!
		0	0	#DIV/0!	0	0	#DIV/0!		0	0	#DIV/0!				#DIV/0!
		0	0	#DIV/0!	0	0	#DIV/0!		0	0	#DIV/0!				#DIV/0!
		0	0	#DIV/0!	0	0	#DIV/0!		0	0	#DIV/0!				#DIV/0!
		0	0	#DIV/0!	0	0	#DIV/0!		0	0	#DIV/0!				#DIV/0!
		0	0	#DIV/0!	0	0	#DIV/0!		0	0	#DIV/0!				#DIV/0!
		0	0	#DIV/0!	0	0	#DIV/0!		0	0	#DIV/0!				#DIV/0!
		0	0	#DIV/0!	0	0	#DIV/0!		0	0	#DIV/0!				#DIV/0!
		0	0	#DIV/0!	0	0	#DIV/0!		0	0	#DIV/0!				#DIV/0!
		0	0	#DIV/0!	0	0	#DIV/0!		0	0	#DIV/0!				#DIV/0!
		0	0	#DIV/0!	0	0	#DIV/0!		0	0	#DIV/0!				#DIV/0!
		0	0	#DIV/0!	0	0	#DIV/0!		0	0	#DIV/0!				#DIV/0!
		0	0	#DIV/0!	0	0	#DIV/0!		0	0	#DIV/0!				#DIV/0!
		0	0	#DIV/0!	0	0	#DIV/0!		0	0	#DIV/0!				#DIV/0!
		0	0	#DIV/0!	0	0	#DIV/0!		0	0	#DIV/0!				#DIV/0!
		0	0	#DIV/0!	0	0	#DIV/0!		0	0	#DIV/0!				#DIV/0!
		0	0	#DIV/0!	0	0	#DIV/0!		0	0	#DIV/0!				#DIV/0!
		0	0	#DIV/0!	0	0	#DIV/0!		0	0	#DIV/0!				#DIV/0!
		0	0	#DIV/0!	0	0	#DIV/0!		0	0	#DIV/0!				#DIV/0!
		0	0	#DIV/0!	0	0	#DIV/0!		0	0	#DIV/0!				#DIV/0!
		0	0	#DIV/0!	0	0	#DIV/0!		0	0	#DIV/0!				#DIV/0!
		0	0	#DIV/0!	0	0	#DIV/0!		0	0	#DIV/0!				#DIV/0!
		0	0	#DIV/0!	0	0	#DIV/0!		0	0	#DIV/0!				#DIV/0!
		0	0	#DIV/0!	0	0	#DIV/0!		0	0	#DIV/0!				#DIV/0!
		0	0	#DIV/0!	0	0	#DIV/0!		0	0	#DIV/0!				#DIV/0!
		0	0	#DIV/0!	0	0	#DIV/0!		0	0	#DIV/0!				#DIV/0!
		0	0	#DIV/0!	0	0	#DIV/0!		0	0	#DIV/0!				#DIV/0!
		0	0	#DIV/0!	0	0	#DIV/0!		0	0	#DIV/0!				#DIV/0!
		0	0	#DIV/0!	0	0	#DIV/0!		0	0	#DIV/0!				#DIV/0!
		0	0	#DIV/0!	0	0	#DIV/0!		0	0	#DIV/0!				#DIV/0!
		0	0	#DIV/0!	0	0	#DIV/0!		0	0	#DIV/0!				#DIV/0!
		0	0	#DIV/0!	0	0	#DIV/0!		0	0	#DIV/0!				#DIV/0!
		0	0	#DIV/0!	0	0	#DIV/0!		0	0	#DIV/0!				#DIV/0!
		0	0	#DIV/0!	0	0	#DIV/0!		0	0	#DIV/0!				#DIV/0!
		0	0	#DIV/0!	0	0	#DIV/0!		0	0	#DIV/0!				#DIV/0!
		0	0	#DIV/0!	0	0	#DIV/0!		0	0	#DIV/0!				#DIV/0!
		0	0	#DIV/0!	0	0	#DIV/0!		0	0	#DIV/0!				#DIV/0!
		0	0	#DIV/0!	0	0	#DIV/0!		0	0	#DIV/0!				#DIV/0!
		0	0	#DIV/0!	0	0	#DIV/0!		0	0	#DIV/0!				#DIV/0!
		0	0	#DIV/0!	0	0	#DIV/0!		0	0	#DIV/0!				#DIV/0!
		0	0	#DIV/0!	0	0	#DIV/0!		0	0	#DIV/0!				#DIV/0!
		0	0	#DIV/0!	0	0	#DIV/0!		0	0	#DIV/0!				#DIV/0!
		0	0	#DIV/0!	0	0	#DIV/0!		0	0	#DIV/0!				#DIV/0!
		0	0	#DIV/0!	0	0	#DIV/0!		0	0	#DIV/0!				#DIV/0!
		0	0	#DIV/0!	0	0	#DIV/0!		0	0	#DIV/0!				#DIV/0!
		0	0	#DIV/0!	0	0	#DIV/0!		0	0	#DIV/0!				#DIV/0!
		0	0	#DIV/0!	0	0	#DIV/0!		0	0	#DIV/0!				#DIV/0!
		0	0	#DIV/0!	0	0	#DIV/0!		0	0	#DIV/0!				#DIV/0!
		0	0	#DIV/0!	0	0	#DIV/0!		0	0	#DIV/0!				#DIV/0!
		0	0	#DIV/0!	0	0	#DIV/0!		0	0	#DIV/0!				#DIV/0!
		0	0	#DIV/0!	0	0	#DIV/0!		0	0	#DIV/0!				#DIV/0!
		0	0	#DIV/0!	0	0	#DIV/0!		0	0	#DIV/0!				#DIV/0!
		0	0	#DIV/0!	0	0	#DIV/0!		0	0	#DIV/0!				#DIV/0!
		0	0	#DIV/0!	0	0	#DIV/0!		0	0	#DIV/0!				#DIV/0!
		0	0	#DIV/0!	0	0	#DIV/0!		0	0	#DIV/0!				#DIV/0!
		0	0	#DIV/0!	0	0	#DIV/0!		0	0	#DIV/0!				#DIV/0!
		0	0	#DIV/0!	0	0	#DIV/0!		0	0	#DIV/0!				#DIV/0!
		0	0	#DIV/0!	0	0	#DIV/0!		0	0	#DIV/0!				#DIV/0!
		0	0	#DIV/0!	0	0	#DIV/0!		0	0	#DIV/0!				#DIV/0!
		0	0	#DIV/0!	0	0	#DIV/0!		0	0	#DIV/0!				#DIV/0!
		0	0	#DIV/0!	0	0	#DIV/0!		0	0	#DIV/0!				#DIV/0!
		0	0	#DIV/0!	0	0	#DIV/0!		0	0	#DIV/0!				#DIV/0!
		0	0	#DIV/0!	0	0	#DIV/0!		0	0	#DIV/0!				#DIV/0!
		0	0	#DIV/0!	0	0	#DIV/0!		0	0	#DIV/0!				#DIV/0!
		0	0	#DIV/0!	0	0	#DIV/0!		0	0	#DIV/0!				#DIV/0!
		0	0	#DIV/0!	0	0	#DIV/0!		0	0	#DIV/0!				#DIV/0!
		0	0	#DIV/0!	0	0	#DIV/0!		0	0	#DIV/0!				#DIV/0!
		0	0	#DIV/0!	0	0	#DIV/0!		0	0	#DIV/0!				#DIV/0!
		0	0	#DIV/0!	0	0	#DIV/0!		0	0	#DIV/0!				#DIV/0!
		0	0	#DIV/0!	0	0	#DIV/0!		0	0	#DIV/0!				#DIV/0!
		0	0	#DIV/0!	0	0	#DIV/0!		0	0	#DIV/0!				#DIV/0!
		0	0	#DIV/0!	0	0	#DIV/0!		0	0	#DIV/0!				#DIV/0!
		0	0	#DIV/0!	0	0	#DIV/0!		0	0	#DIV/0!				#DIV/0!
		0	0	#DIV/0!	0	0	#DIV/0!		0	0	#DIV/0!				#DIV/0!
		0	0	#DIV/0!	0	0	#DIV/0!		0	0	#DIV/0!				#DIV/0!
		0	0	#DIV/0!	0	0	#DIV/0!		0	0	#DIV/0!				#DIV/0!
		0	0	#DIV/0!	0	0	#DIV/0!		0	0	#DIV/0!				#DIV/0!
		0	0	#DIV/0!	0	0	#DIV/0!		0	0	#DIV/0!				#DIV/0!
		0	0	#DIV/0!	0	0	#DIV/0!		0	0	#DIV/0!				#DIV/0!
		0	0	#DIV/0!	0	0	#DIV/0!		0	0	#DIV/0!				#DIV/0!
		0	0	#DIV/0!	0	0	#DIV/0!		0	0	#DIV/0!				#DIV/0!
		0	0	#DIV/0!	0	0	#DIV/0!		0	0	#DIV/0!				#DIV/0!
		0	0	#DIV/0!	0	0	#DIV/0!		0	0	#DIV/0!				#DIV/0!
		0	0	#DIV/0!	0	0	#DIV/0!		0	0	#DIV/0!				#DIV/0!
		0	0	#DIV/0!	0	0	#DIV/0!		0	0	#DIV/0!				#DIV/0!
		0	0	#DIV/0!	0	0	#DIV/0!		0	0	#DIV/0!				#DIV/0!
		0	0	#DIV/0!	0	0	#DIV/0!		0	0	#DIV/0!				#DIV/0!
		0	0	#DIV/0!	0	0	#DIV/0!		0	0	#DIV/0!				#DIV/0!
		0	0	#DIV/0!	0	0	#DIV/0!		0	0	#DIV/0!				#DIV/0!
		0	0	#DIV/0!	0	0	#DIV/0!		0	0	#DIV/0!				#DIV/0!
		0	0	#DIV/0!	0	0	#DIV/0!		0	0	#DIV/0!				#DIV/0!
		0	0	#DIV/0!	0	0	#DIV/0!		0	0	#DIV/0!				#DIV/0!
		0	0	#DIV/0!	0	0	#DIV/0!		0	0	#DIV/0!				#DIV/0!
		0	0	#DIV/0!	0	0	#DIV/0!		0	0	#DIV/0!				#DIV/0!
		0	0	#DIV/0!	0	0	#DIV/0!		0	0	#DIV/0!				#DIV/0!
		0	0	#DIV/0!	0	0	#DIV/0!		0	0	#DIV/0!				#DIV/0!
		0	0	#DIV/0!	0	0	#DIV/0!		0	0	#DIV/0!				#DIV/0!
		0	0	#DIV/0!	0	0	#DIV/0!		0	0	#DIV/0!				#DIV/0!
		0	0	#DIV/0!	0	0	#DIV/0!		0	0	#DIV/0!				#DIV/0!
		0	0	#DIV/0!	0	0	#DIV/0!		0	0	#DIV/0!				#DIV/0!
		0	0	#DIV/0!	0	0	#DIV/0!		0	0	#DIV/0!				#DIV/0!
		0	0	#DIV/0!	0	0	#DIV/0!		0	0	#DIV/0!				#DIV/0!
		0	0	#DIV/0!	0	0	#DIV/0!		0	0	#DIV/0!				#DIV/0!
		0	0	#DIV/0!	0	0	#DIV/0!		0	0	#DIV/0!				#DIV/0!
		0	0	#DIV/0!	0	0	#DIV/0!		0	0	#DIV/0!				#DIV/0!
		0	0	#DIV/0!	0	0	#DIV/0!		0	0	#DIV/0!				#DIV/0!
		0	0	#DIV/0!	0	0	#DIV/0!		0	0	#DIV/0!				#DIV/0!
		0	0	#DIV/0!	0	0	#DIV/0!		0	0	#DIV/0!				#DIV/0!
		0	0	#DIV/0!	0	0	#DIV/0!		0	0	#DIV/0!				#DIV/0!
		0	0	#DIV/0!	0	0	#DIV/0!		0	0	#DIV/0!				#DIV/0!
		0	0	#DIV/0!	0	0	#DIV/0!		0	0	#DIV/0!				#DIV/0!
		0	0	#DIV/0!	0	0	#DIV/0!		0	0	#DIV/0!				#DIV/0!
		0	0	#DIV/0!	0	0	#DIV/0!		0	0	#DIV/0!				#DIV/0!
		0	0	#DIV/0!	0	0	#DIV/0!		0	0	#DIV/0!				#DIV/0!
		0	0	#DIV/0!	0	0	#DIV/0!		0	0	#DIV/0!				#DIV/0!
		0	0	#DIV/0!	0	0	#DIV/0!		0	0	#DIV/0!				#DIV/0!
		0	0	#DIV/0!	0	0	#DIV/0!		0	0	#DIV/0!				#DIV/0!
		0	0	#DIV/0!	0	0	#DIV/0!		0	0	#DIV/0!				#DIV/0!
[truncated: 115 more columns]

## Sheet: 5-endocrine
Tumours of the endocrine system
TABLE 3 - Prevalence of TERT promoter mutations		Prev(n)	Total(n)	Total(%)	p1	t1	%	ref1	p2	t2	%	ref2	p3	t3	%	ref3	p4	t4	%	ref4	p5	t5	%	ref5	p6	t6	%	ref6	p7	t7	%	ref7	p8	t8	%	ref8	p9	t9	%	ref9	p10	t10	%	ref10	p11	t11	%	ref11	p12
Tumours of the thyroid gland	Benign thyroid tumour, atypical follicular adenoma	3	18	0.166667	3	18	0.166667	Wang2014	0	0
Tumours of the thyroid gland	Papillary carcinoma, conventional variant	178	1838	0.0968444	23	187	0.122995	Liu2013	12	110	0.109091	Vinagre2013	19	230	0.0826087	Melo2014	47	383	0.122715	Xing2014	12	143	0.0839161	Muzza2015	10	153	0.0653595	Qasem2015	6	66	0.0909091	Gandolfi2015	1	35	0.0285714	Jeon2016	13	295	0.0440678	Sun2016	27	178	0.151685	Lee2016	8	58	0.137931	Bullock2016
Tumours of the thyroid gland	Papillary carcinoma, follicular variant	27	481	0.0561331	2	56	0.0357143	Liu2013	0	39	0	Vinagre2013	8	103	0.0776699	Xing2014	5	74	0.0675676	Melo2014	7	56	0.125	Qasem2015	2	15	0.133333	Gandolfi2015	2	24	0.0833333	Lee2016	1	98	0.0102041	Sun2016	0	16	0	Bullock2016
Tumours of the thyroid gland	Papillary carcinoma, tall cell variant	40	214	0.186916	4	13	0.307692	Liu2013	5	19	0.263158	Xing2014	0	2	0	Melo2014	11	35	0.314286	Gandolfi2015	8	110	0.0727273	Dettmer2015	9	30	0.3	Qasem2015	3	5	0.6	Bullock2016
Tumours of the thyroid gland	Papillary thyroid carcinoma, NOS	361	3288	0.109793	1	4	0.25	Vinagre2013	18	80	0.225	Landa2013	0	22	0	Melo2014	5	111	0.045045	Liu2014_1	13	51	0.254902	Liu2014_2	46	408	0.112745	Liu2014_3	2	5	0.4	Gandolfi2015	10	39	0.25641	Muzza2015	77	242	0.318182	George2015	0	4	0	Qasem2015	8	110	0.0727273	Dettmer2015	27
Tumours of the thyroid gland	Follicular thyroid carcinoma	102	564	0.180851	9	64	0.140625	Vinagre2013	11	79	0.139241	Liu2013	9	52	0.173077	Wang2014	12	70	0.171429	Melo2014	4	18	0.222222	Liu2014_1	8	36	0.222222	Liu2014_2	8	22	0.363636	Liu2014_3	8	58	0.137931	Muzza2015	1	5	0.2	Qasem2015	11	66	0.166667	Kim2016	4	15	0.266667	Lee2016	11
Tumours of the thyroid gland	Hürthle cell carcinoma	11	146	0.0753425	4	17	0.235294	Landa2013	1	3	0.333333	Qasem2015	6	126	0.047619	Chindris2015
Tumours of the thyroid gland	Poorly differentiated thyroid carcinoma	88	217	0.40553	3	14	0.214286	Vinagre2013	3	8	0.375	Liu2013	30	58	0.517241	Landa2013	9	31	0.290323	Melo2014	6	14	0.428571	Qasem2015	34	84	0.404762	Landa2016	1	2	0.5	Lee2016	2	6	0.333333	Ahn2017
Tumours of the thyroid gland	Anaplastic thyroid carcinoma	150	316	0.474684	2	16	0.125	Vinagre2013	23	54	0.425926	Liu2013	10	20	0.5	Landa2013	12	26	0.461538	Melo2014	10	20	0.5	Liu2014_3	41	106	0.386792	Shi2015	2	5	0.4	Lee2016	24	33	0.727273	Landa2016	4	9	0.444444	Ahn2017	22	27	0.814815	Oishi2017
Tumours of the thyroid gland	Metastases of well-differentiated papillary and follicular thyroid carcinomas, NOS	90	437	0.20595	17	34	0.5	Melo2014	14	43	0.325581	Gandolfi2015	15	66	0.227273	Yang2017	44	294	0.14966	Melo2017
Tumours of the adrenal cortex	Adrenal cortical carcinoma	4	34	0.117647	4	34	0.117647	Liu2014	0	0
Tumours of the adrenal medulla and extra-adrenal paraganglia	Extra-adrenal paraganglioma	1	9	0.111111	1	9	0.111111	Liu2014	0	0
Tumours of the pituitary gland	Pituitary adenoma	0	15	0	0	15	0	Martins2016	0	0
Tumours of the thyroid gland	Follicular thyroid adenoma	8	263	0.0304183	0	60	0	Vinagre2013	0	111	0	Liu2014	1	58	0.0172414	Wang2014	1	6	0.166667	Lee2016	6	28	0.214286	Boaventura2017
Tumours of the thyroid gland	Benign thyroid tumour, NOS	0	44	0	0	44	0	Liu2014_3
Tumours of the thyroid gland	Papillary thyroid carcinoma, hobnail variant	0	10	0	0	10	0	Lee2015	0	0
Tumours of the thyroid gland	Papillary microcarcinoma	19	435	0.0436782	0	5	0	Vinagre2013	19	404	0.0470297	DeBiase2015	0	26	0	Yabuta2017
Tumours of the thyroid gland	Paediatric papillary carcinoma	1	105	0.00952381	0	50	0	Onder2016	1	55	0.0181818	Alzhrani2016
Tumours of the thyroid gland	Minimally invasive Hürthle cell tumour	2	52	0.0384615	2	44	0.0454545	Chindris2013	0	8	0	Landa2013
Tumours of the thyroid gland	Medullary thyroid carcinoma	0	135	0	0	28	0	Vingare2013	0	24	0	Killela2013	0	16	0	Liu2013	0	16	0	Liu2013_2	0	37	0	Liu2014	0	14	0	Muzza2015
Tumours of the adrenal cortex	Adrenal cortical adenoma	0	47	0	0	47	0	Liu2014	0	0
Tumours of the adrenal medulla and extra-adrenal paraganglia	Phaechromocytoma	1	122	0.00819672	0	17	0	Vingare2013	0	10	0	Liu2014	1	95	0.0105263	Liu2014_3
Tumours of the adrenal medulla and extra-adrenal paraganglia	Extra-adrenal benign paraganglioma	0	4	0	0	4	0	Liu2014	0	0
Neoplasms of the neuroendocrine pancreas	Pancreatic neuroendocrine tumour, NOS	4	123	0.0325203	0	68	0	Killela2013	4	55	0.0727273	Vinagre2016
			8917
TABLE 4A - Prevalence of TERT amplifications		Prev(n)	Total(n)	Total(%)	p1	t1	%	ref1
Tumours of the adrenal cortex	Adrenal cortical carcinoma	11	75	0.146667	11	75	0.146667	Barthel2017
TABLE 4B - Prevalence of TERC amplifications
Absence of studies.
TABLE 6 - Prevalence of ALT		Prev(n)	Total(n)	Total(%)	p1	t1	%	ref1	p2	t2	%	ref2	p3	t3	%	ref3	p4	t4	%	ref4	p5	t5	%	ref5	p6	t6	%	ref6	p7	t7	%	ref7
Tumours of the thyroid gland	Medullary thyroid carcinoma	11	42	0.261905	11	42	0.261905	Wang2014
Tumours of the adrenal cortex	Adrenal cortical carcinoma	3	24	0.125	3	24	0.125	Else2008
Tumours of the adrenal medulla and extra-adrenal paraganglia	Extra-adrenal paranganglioma	1	8	0.125	1	8	0.125	Heaphy2011
Neoplasms of the neuroendocrine pancreas	Pancreatic neuroendocrine tumour, NOS	255	849	0.300353	25	41	0.609756	Heaphy2011_2	24	43	0.55814	Dogeas2014	30	63	0.47619	Marinoni2014	7	47	0.148936	Kim2015	56	269	0.208178	Kim2016	98	321	0.305296	Singhi2016	15	65	0.230769	VandenBussche2017
Tumours of the thyroid gland	Thyroid adenoma	0	64	0	0	34	0	Heaphy2011	0	30	0	Heaphy2011
Tumours of the thyroid gland	Papillary thyroid carcinoma, NOS	0	47	0	0	17	0	Henson2005	0	30	0	Heaphy2011
Tumours of the thyroid gland	Follicular thyroid carcinoma	0	52	0	0	52	0	Heaphy2011
Tumours of the parathyroid glands	Parathyroid adenoma	0	38	0	0	38	0	Heaphy2011
Tumours of the adrenal cortex	Adrenal adenoma	0	14	0	0	14	0	Heaphy2011
Tumours of the adrenal medulla and extra-adrenal paraganglia	Phaeochromocytoma	2	67	0.0298507	2	67	0.0298507	Heaphy2011
			1205
NOS non otherwise specified
			2410		0	0	#DIV/0!		0	0	#DIV/0!				#DIV/0!				#DIV/0!				#DIV/0!				#DIV/0!				#DIV/0!				#DIV/0!
					0	0	#DIV/0!		0	0	#DIV/0!				#DIV/0!				#DIV/0!				#DIV/0!				#DIV/0!				#DIV/0!				#DIV/0!
		0	0	#DIV/0!	0	0	#DIV/0!		0	0	#DIV/0!				#DIV/0!				#DIV/0!				#DIV/0!				#DIV/0!				#DIV/0!				#DIV/0!
		0	0	#DIV/0!	0	0	#DIV/0!		0	0	#DIV/0!				#DIV/0!				#DIV/0!				#DIV/0!				#DIV/0!				#DIV/0!				#DIV/0!
		0	0	#DIV/0!	0	0	#DIV/0!		0	0	#DIV/0!				#DIV/0!				#DIV/0!				#DIV/0!				#DIV/0!				#DIV/0!				#DIV/0!
		0	0	#DIV/0!	0	0	#DIV/0!		0	0	#DIV/0!				#DIV/0!				#DIV/0!				#DIV/0!				#DIV/0!				#DIV/0!				#DIV/0!
		0	0	#DIV/0!	0	0	#DIV/0!		0	0	#DIV/0!				#DIV/0!				#DIV/0!				#DIV/0!				#DIV/0!				#DIV/0!				#DIV/0!
		0	0	#DIV/0!	0	0	#DIV/0!		0	0	#DIV/0!				#DIV/0!				#DIV/0!				#DIV/0!				#DIV/0!				#DIV/0!				#DIV/0!
		0	0	#DIV/0!	0	0	#DIV/0!		0	0	#DIV/0!				#DIV/0!				#DIV/0!				#DIV/0!				#DIV/0!				#DIV/0!				#DIV/0!
		0	0	#DIV/0!	0	0	#DIV/0!		0	0	#DIV/0!				#DIV/0!				#DIV/0!				#DIV/0!				#DIV/0!				#DIV/0!				#DIV/0!
		0	0	#DIV/0!	0	0	#DIV/0!		0	0	#DIV/0!				#DIV/0!				#DIV/0!				#DIV/0!				#DIV/0!				#DIV/0!				#DIV/0!
		0	0	#DIV/0!	0	0	#DIV/0!		0	0	#DIV/0!				#DIV/0!				#DIV/0!				#DIV/0!				#DIV/0!				#DIV/0!				#DIV/0!
		0	0	#DIV/0!	0	0	#DIV/0!		0	0	#DIV/0!				#DIV/0!				#DIV/0!				#DIV/0!				#DIV/0!				#DIV/0!				#DIV/0!
		0	0	#DIV/0!	0	0	#DIV/0!		0	0	#DIV/0!				#DIV/0!				#DIV/0!				#DIV/0!				#DIV/0!				#DIV/0!				#DIV/0!
		0	0	#DIV/0!	0	0	#DIV/0!		0	0	#DIV/0!				#DIV/0!				#DIV/0!				#DIV/0!				#DIV/0!				#DIV/0!				#DIV/0!
		0	0	#DIV/0!	0	0	#DIV/0!		0	0	#DIV/0!				#DIV/0!				#DIV/0!				#DIV/0!				#DIV/0!				#DIV/0!				#DIV/0!
		0	0	#DIV/0!	0	0	#DIV/0!		0	0	#DIV/0!				#DIV/0!				#DIV/0!				#DIV/0!				#DIV/0!				#DIV/0!				#DIV/0!
		0	0	#DIV/0!	0	0	#DIV/0!		0	0	#DIV/0!				#DIV/0!				#DIV/0!				#DIV/0!				#DIV/0!				#DIV/0!				#DIV/0!
		0	0	#DIV/0!	0	0	#DIV/0!		0	0	#DIV/0!				#DIV/0!				#DIV/0!				#DIV/0!				#DIV/0!				#DIV/0!				#DIV/0!
		0	0	#DIV/0!	0	0	#DIV/0!		0	0	#DIV/0!				#DIV/0!				#DIV/0!				#DIV/0!				#DIV/0!				#DIV/0!				#DIV/0!
		0	0	#DIV/0!	0	0	#DIV/0!		0	0	#DIV/0!				#DIV/0!				#DIV/0!				#DIV/0!				#DIV/0!				#DIV/0!				#DIV/0!
		0	0	#DIV/0!	0	0	#DIV/0!		0	0	#DIV/0!				#DIV/0!				#DIV/0!				#DIV/0!				#DIV/0!				#DIV/0!				#DIV/0!
		0	0	#DIV/0!	0	0	#DIV/0!		0	0	#DIV/0!				#DIV/0!				#DIV/0!				#DIV/0!				#DIV/0!				#DIV/0!				#DIV/0!
		0	0	#DIV/0!	0	0	#DIV/0!		0	0	#DIV/0!				#DIV/0!				#DIV/0!				#DIV/0!				#DIV/0!				#DIV/0!				#DIV/0!
		0	0	#DIV/0!	0	0	#DIV/0!		0	0	#DIV/0!				#DIV/0!				#DIV/0!				#DIV/0!				#DIV/0!				#DIV/0!				#DIV/0!
		0	0	#DIV/0!	0	0	#DIV/0!		0	0	#DIV/0!				#DIV/0!				#DIV/0!				#DIV/0!				#DIV/0!				#DIV/0!				#DIV/0!
		0	0	#DIV/0!	0	0	#DIV/0!		0	0	#DIV/0!				#DIV/0!				#DIV/0!				#DIV/0!				#DIV/0!				#DIV/0!				#DIV/0!
		0	0	#DIV/0!	0	0	#DIV/0!		0	0	#DIV/0!				#DIV/0!				#DIV/0!				#DIV/0!				#DIV/0!				#DIV/0!				#DIV/0!
		0	0	#DIV/0!	0	0	#DIV/0!		0	0	#DIV/0!				#DIV/0!				#DIV/0!				#DIV/0!				#DIV/0!				#DIV/0!				#DIV/0!
		0	0	#DIV/0!	0	0	#DIV/0!		0	0	#DIV/0!				#DIV/0!				#DIV/0!				#DIV/0!				#DIV/0!				#DIV/0!				#DIV/0!
		0	0	#DIV/0!	0	0	#DIV/0!		0	0	#DIV/0!				#DIV/0!				#DIV/0!				#DIV/0!				#DIV/0!				#DIV/0!				#DIV/0!
		0	0	#DIV/0!	0	0	#DIV/0!		0	0	#DIV/0!				#DIV/0!				#DIV/0!				#DIV/0!				#DIV/0!				#DIV/0!				#DIV/0!
		0	0	#DIV/0!	0	0	#DIV/0!		0	0	#DIV/0!				#DIV/0!				#DIV/0!				#DIV/0!				#DIV/0!				#DIV/0!				#DIV/0!
		0	0	#DIV/0!	0	0	#DIV/0!		0	0	#DIV/0!				#DIV/0!				#DIV/0!				#DIV/0!				#DIV/0!				#DIV/0!				#DIV/0!
		0	0	#DIV/0!	0	0	#DIV/0!		0	0	#DIV/0!				#DIV/0!				#DIV/0!				#DIV/0!				#DIV/0!				#DIV/0!				#DIV/0!
		0	0	#DIV/0!	0	0	#DIV/0!		0	0	#DIV/0!				#DIV/0!				#DIV/0!				#DIV/0!				#DIV/0!				#DIV/0!				#DIV/0!
		0	0	#DIV/0!	0	0	#DIV/0!		0	0	#DIV/0!				#DIV/0!				#DIV/0!				#DIV/0!				#DIV/0!				#DIV/0!				#DIV/0!
		0	0	#DIV/0!	0	0	#DIV/0!		0	0	#DIV/0!				#DIV/0!				#DIV/0!				#DIV/0!				#DIV/0!				#DIV/0!				#DIV/0!
		0	0	#DIV/0!	0	0	#DIV/0!		0	0	#DIV/0!				#DIV/0!				#DIV/0!				#DIV/0!				#DIV/0!				#DIV/0!				#DIV/0!
		0	0	#DIV/0!	0	0	#DIV/0!		0	0	#DIV/0!				#DIV/0!				#DIV/0!				#DIV/0!				#DIV/0!				#DIV/0!				#DIV/0!
		0	0	#DIV/0!	0	0	#DIV/0!		0	0	#DIV/0!				#DIV/0!				#DIV/0!				#DIV/0!				#DIV/0!				#DIV/0!				#DIV/0!
		0	0	#DIV/0!	0	0	#DIV/0!		0	0	#DIV/0!				#DIV/0!				#DIV/0!				#DIV/0!				#DIV/0!				#DIV/0!				#DIV/0!
		0	0	#DIV/0!	0	0	#DIV/0!		0	0	#DIV/0!				#DIV/0!				#DIV/0!				#DIV/0!				#DIV/0!				#DIV/0!				#DIV/0!
		0	0	#DIV/0!	0	0	#DIV/0!		0	0	#DIV/0!				#DIV/0!				#DIV/0!				#DIV/0!				#DIV/0!				#DIV/0!				#DIV/0!
		0	0	#DIV/0!	0	0	#DIV/0!		0	0	#DIV/0!				#DIV/0!				#DIV/0!				#DIV/0!				#DIV/0!				#DIV/0!				#DIV/0!
		0	0	#DIV/0!	0	0	#DIV/0!		0	0	#DIV/0!				#DIV/0!				#DIV/0!				#DIV/0!				#DIV/0!				#DIV/0!				#DIV/0!
		0	0	#DIV/0!	0	0	#DIV/0!		0	0	#DIV/0!				#DIV/0!				#DIV/0!				#DIV/0!				#DIV/0!				#DIV/0!				#DIV/0!
		0	0	#DIV/0!	0	0	#DIV/0!		0	0	#DIV/0!				#DIV/0!				#DIV/0!				#DIV/0!				#DIV/0!				#DIV/0!				#DIV/0!
		0	0	#DIV/0!	0	0	#DIV/0!		0	0	#DIV/0!				#DIV/0!				#DIV/0!				#DIV/0!				#DIV/0!				#DIV/0!				#DIV/0!
		0	0	#DIV/0!	0	0	#DIV/0!		0	0	#DIV/0!				#DIV/0!				#DIV/0!				#DIV/0!				#DIV/0!				#DIV/0!				#DIV/0!
		0	0	#DIV/0!	0	0	#DIV/0!		0	0	#DIV/0!				#DIV/0!				#DIV/0!				#DIV/0!				#DIV/0!				#DIV/0!				#DIV/0!
		0	0	#DIV/0!	0	0	#DIV/0!		0	0	#DIV/0!				#DIV/0!				#DIV/0!				#DIV/0!				#DIV/0!				#DIV/0!				#DIV/0!
		0	0	#DIV/0!	0	0	#DIV/0!		0	0	#DIV/0!				#DIV/0!				#DIV/0!				#DIV/0!				#DIV/0!				#DIV/0!				#DIV/0!
		0	0	#DIV/0!	0	0	#DIV/0!		0	0	#DIV/0!				#DIV/0!				#DIV/0!				#DIV/0!				#DIV/0!				#DIV/0!				#DIV/0!
		0	0	#DIV/0!	0	0	#DIV/0!		0	0	#DIV/0!				#DIV/0!				#DIV/0!				#DIV/0!				#DIV/0!				#DIV/0!				#DIV/0!
		0	0	#DIV/0!	0	0	#DIV/0!		0	0	#DIV/0!				#DIV/0!				#DIV/0!				#DIV/0!				#DIV/0!				#DIV/0!				#DIV/0!
		0	0	#DIV/0!	0	0	#DIV/0!		0	0	#DIV/0!				#DIV/0!				#DIV/0!				#DIV/0!				#DIV/0!				#DIV/0!				#DIV/0!
		0	0	#DIV/0!	0	0	#DIV/0!		0	0	#DIV/0!				#DIV/0!				#DIV/0!				#DIV/0!				#DIV/0!				#DIV/0!				#DIV/0!
		0	0	#DIV/0!	0	0	#DIV/0!		0	0	#DIV/0!				#DIV/0!				#DIV/0!				#DIV/0!				#DIV/0!				#DIV/0!				#DIV/0!
		0	0	#DIV/0!	0	0	#DIV/0!		0	0	#DIV/0!				#DIV/0!				#DIV/0!				#DIV/0!				#DIV/0!				#DIV/0!				#DIV/0!
		0	0	#DIV/0!	0	0	#DIV/0!		0	0	#DIV/0!				#DIV/0!				#DIV/0!				#DIV/0!				#DIV/0!				#DIV/0!				#DIV/0!
		0	0	#DIV/0!	0	0	#DIV/0!		0	0	#DIV/0!				#DIV/0!				#DIV/0!				#DIV/0!				#DIV/0!				#DIV/0!				#DIV/0!
		0	0	#DIV/0!	0	0	#DIV/0!		0	0	#DIV/0!				#DIV/0!				#DIV/0!				#DIV/0!				#DIV/0!				#DIV/0!				#DIV/0!
		0	0	#DIV/0!	0	0	#DIV/0!		0	0	#DIV/0!				#DIV/0!				#DIV/0!				#DIV/0!				#DIV/0!				#DIV/0!				#DIV/0!
		0	0	#DIV/0!	0	0	#DIV/0!		0	0	#DIV/0!				#DIV/0!				#DIV/0!				#DIV/0!				#DIV/0!				#DIV/0!				#DIV/0!
		0	0	#DIV/0!	0	0	#DIV/0!		0	0	#DIV/0!				#DIV/0!				#DIV/0!				#DIV/0!				#DIV/0!				#DIV/0!				#DIV/0!
		0	0	#DIV/0!	0	0	#DIV/0!		0	0	#DIV/0!				#DIV/0!				#DIV/0!				#DIV/0!				#DIV/0!				#DIV/0!				#DIV/0!
		0	0	#DIV/0!	0	0	#DIV/0!		0	0	#DIV/0!				#DIV/0!				#DIV/0!				#DIV/0!				#DIV/0!				#DIV/0!				#DIV/0!
		0	0	#DIV/0!	0	0	#DIV/0!		0	0	#DIV/0!				#DIV/0!				#DIV/0!				#DIV/0!				#DIV/0!				#DIV/0!				#DIV/0!
		0	0	#DIV/0!	0	0	#DIV/0!		0	0	#DIV/0!				#DIV/0!				#DIV/0!				#DIV/0!				#DIV/0!				#DIV/0!				#DIV/0!
		0	0	#DIV/0!	0	0	#DIV/0!		0	0	#DIV/0!				#DIV/0!				#DIV/0!				#DIV/0!				#DIV/0!				#DIV/0!				#DIV/0!
		0	0	#DIV/0!	0	0	#DIV/0!		0	0	#DIV/0!				#DIV/0!				#DIV/0!				#DIV/0!				#DIV/0!				#DIV/0!				#DIV/0!
		0	0	#DIV/0!	0	0	#DIV/0!		0	0	#DIV/0!				#DIV/0!				#DIV/0!				#DIV/0!				#DIV/0!				#DIV/0!				#DIV/0!
		0	0	#DIV/0!	0	0	#DIV/0!		0	0	#DIV/0!				#DIV/0!				#DIV/0!				#DIV/0!				#DIV/0!				#DIV/0!				#DIV/0!
		0	0	#DIV/0!	0	0	#DIV/0!		0	0	#DIV/0!				#DIV/0!				#DIV/0!				#DIV/0!				#DIV/0!				#DIV/0!				#DIV/0!
		0	0	#DIV/0!	0	0	#DIV/0!		0	0	#DIV/0!				#DIV/0!				#DIV/0!				#DIV/0!				#DIV/0!				#DIV/0!				#DIV/0!
		0	0	#DIV/0!	0	0	#DIV/0!		0	0	#DIV/0!				#DIV/0!				#DIV/0!				#DIV/0!				#DIV/0!				#DIV/0!				#DIV/0!
		0	0	#DIV/0!	0	0	#DIV/0!		0	0	#DIV/0!				#DIV/0!				#DIV/0!				#DIV/0!				#DIV/0!				#DIV/0!				#DIV/0!
		0	0	#DIV/0!	0	0	#DIV/0!		0	0	#DIV/0!				#DIV/0!				#DIV/0!				#DIV/0!				#DIV/0!				#DIV/0!				#DIV/0!
		0	0	#DIV/0!	0	0	#DIV/0!		0	0	#DIV/0!				#DIV/0!				#DIV/0!				#DIV/0!				#DIV/0!				#DIV/0!				#DIV/0!
		0	0	#DIV/0!	0	0	#DIV/0!		0	0	#DIV/0!				#DIV/0!				#DIV/0!				#DIV/0!				#DIV/0!				#DIV/0!				#DIV/0!
		0	0	#DIV/0!	0	0	#DIV/0!		0	0	#DIV/0!				#DIV/0!				#DIV/0!				#DIV/0!				#DIV/0!				#DIV/0!				#DIV/0!
		0	0	#DIV/0!	0	0	#DIV/0!		0	0	#DIV/0!				#DIV/0!				#DIV/0!				#DIV/0!				#DIV/0!				#DIV/0!				#DIV/0!
		0	0	#DIV/0!	0	0	#DIV/0!		0	0	#DIV/0!				#DIV/0!				#DIV/0!				#DIV/0!				#DIV/0!				#DIV/0!				#DIV/0!
		0	0	#DIV/0!	0	0	#DIV/0!		0	0	#DIV/0!				#DIV/0!				#DIV/0!				#DIV/0!				#DIV/0!				#DIV/0!				#DIV/0!
		0	0	#DIV/0!	0	0	#DIV/0!		0	0	#DIV/0!				#DIV/0!				#DIV/0!				#DIV/0!				#DIV/0!				#DIV/0!				#DIV/0!
		0	0	#DIV/0!	0	0	#DIV/0!		0	0	#DIV/0!				#DIV/0!				#DIV/0!				#DIV/0!				#DIV/0!				#DIV/0!				#DIV/0!
		0	0	#DIV/0!	0	0	#DIV/0!		0	0	#DIV/0!				#DIV/0!				#DIV/0!				#DIV/0!				#DIV/0!				#DIV/0!				#DIV/0!
		0	0	#DIV/0!	0	0	#DIV/0!		0	0	#DIV/0!				#DIV/0!				#DIV/0!				#DIV/0!				#DIV/0!				#DIV/0!				#DIV/0!
		0	0	#DIV/0!	0	0	#DIV/0!		0	0	#DIV/0!				#DIV/0!				#DIV/0!				#DIV/0!				#DIV/0!				#DIV/0!				#DIV/0!
		0	0	#DIV/0!	0	0	#DIV/0!		0	0	#DIV/0!				#DIV/0!				#DIV/0!				#DIV/0!				#DIV/0!				#DIV/0!				#DIV/0!
		0	0	#DIV/0!	0	0	#DIV/0!		0	0	#DIV/0!				#DIV/0!				#DIV/0!				#DIV/0!				#DIV/0!				#DIV/0!				#DIV/0!
		0	0	#DIV/0!	0	0	#DIV/0!		0	0	#DIV/0!				#DIV/0!				#DIV/0!				#DIV/0!				#DIV/0!				#DIV/0!				#DIV/0!
		0	0	#DIV/0!	0	0	#DIV/0!		0	0	#DIV/0!				#DIV/0!				#DIV/0!				#DIV/0!				#DIV/0!				#DIV/0!				#DIV/0!
		0	0	#DIV/0!	0	0	#DIV/0!		0	0	#DIV/0!				#DIV/0!				#DIV/0!				#DIV/0!				#DIV/0!				#DIV/0!				#DIV/0!
		0	0	#DIV/0!	0	0	#DIV/0!		0	0	#DIV/0!				#DIV/0!				#DIV/0!				#DIV/0!				#DIV/0!				#DIV/0!				#DIV/0!
		0	0	#DIV/0!	0	0	#DIV/0!		0	0	#DIV/0!				#DIV/0!				#DIV/0!				#DIV/0!				#DIV/0!				#DIV/0!				#DIV/0!
		0	0	#DIV/0!	0	0	#DIV/0!		0	0	#DIV/0!				#DIV/0!				#DIV/0!				#DIV/0!				#DIV/0!				#DIV/0!				#DIV/0!
		0	0	#DIV/0!	0	0	#DIV/0!		0	0	#DIV/0!				#DIV/0!				#DIV/0!				#DIV/0!				#DIV/0!				#DIV/0!				#DIV/0!
		0	0	#DIV/0!	0	0	#DIV/0!		0	0	#DIV/0!				#DIV/0!				#DIV/0!				#DIV/0!				#DIV/0!				#DIV/0!				#DIV/0!
		0	0	#DIV/0!	0	0	#DIV/0!		0	0	#DIV/0!				#DIV/0!				#DIV/0!				#DIV/0!				#DIV/0!				#DIV/0!				#DIV/0!
		0	0	#DIV/0!	0	0	#DIV/0!		0	0	#DIV/0!				#DIV/0!				#DIV/0!				#DIV/0!				#DIV/0!				#DIV/0!				#DIV/0!
		0	0	#DIV/0!	0	0	#DIV/0!		0	0	#DIV/0!				#DIV/0!				#DIV/0!				#DIV/0!				#DIV/0!				#DIV/0!				#DIV/0!
		0	0	#DIV/0!	0	0	#DIV/0!		0	0	#DIV/0!				#DIV/0!				#DIV/0!				#DIV/0!				#DIV/0!				#DIV/0!				#DIV/0!
		0	0	#DIV/0!	0	0	#DIV/0!		0	0	#DIV/0!				#DIV/0!				#DIV/0!				#DIV/0!				#DIV/0!				#DIV/0!				#DIV/0!
		0	0	#DIV/0!	0	0	#DIV/0!		0	0	#DIV/0!				#DIV/0!				#DIV/0!				#DIV/0!				#DIV/0!				#DIV/0!				#DIV/0!
		0	0	#DIV/0!	0	0	#DIV/0!		0	0	#DIV/0!				#DIV/0!				#DIV/0!				#DIV/0!				#DIV/0!				#DIV/0!				#DIV/0!
		0	0	#DIV/0!	0	0	#DIV/0!		0	0	#DIV/0!				#DIV/0!				#DIV/0!				#DIV/0!				#DIV/0!				#DIV/0!				#DIV/0!
		0	0	#DIV/0!	0	0	#DIV/0!		0	0	#DIV/0!				#DIV/0!				#DIV/0!				#DIV/0!				#DIV/0!				#DIV/0!				#DIV/0!
		0	0	#DIV/0!	0	0	#DIV/0!		0	0	#DIV/0!				#DIV/0!				#DIV/0!				#DIV/0!				#DIV/0!				#DIV/0!				#DIV/0!
		0	0	#DIV/0!	0	0	#DIV/0!		0	0	#DIV/0!				#DIV/0!				#DIV/0!				#DIV/0!				#DIV/0!				#DIV/0!				#DIV/0!
		0	0	#DIV/0!	0	0	#DIV/0!		0	0	#DIV/0!				#DIV/0!				#DIV/0!				#DIV/0!				#DIV/0!				#DIV/0!				#DIV/0!
		0	0	#DIV/0!	0	0	#DIV/0!		0	0	#DIV/0!				#DIV/0!				#DIV/0!				#DIV/0!				#DIV/0!				#DIV/0!				#DIV/0!
		0	0	#DIV/0!	0	0	#DIV/0!		0	0	#DIV/0!				#DIV/0!				#DIV/0!				#DIV/0!				#DIV/0!				#DIV/0!				#DIV/0!
		0	0	#DIV/0!	0	0	#DIV/0!		0	0	#DIV/0!				#DIV/0!				#DIV/0!				#DIV/0!				#DIV/0!				#DIV/0!				#DIV/0!
		0	0	#DIV/0!	0	0	#DIV/0!		0	0	#DIV/0!				#DIV/0!				#DIV/0!				#DIV/0!				#DIV/0!				#DIV/0!				#DIV/0!
		0	0	#DIV/0!	0	0	#DIV/0!		0	0	#DIV/0!				#DIV/0!				#DIV/0!				#DIV/0!				#DIV/0!				#DIV/0!				#DIV/0!
		0	0	#DIV/0!	0	0	#DIV/0!		0	0	#DIV/0!				#DIV/0!				#DIV/0!				#DIV/0!				#DIV/0!				#DIV/0!				#DIV/0!
		0	0	#DIV/0!	0	0	#DIV/0!		0	0	#DIV/0!				#DIV/0!				#DIV/0!				#DIV/0!				#DIV/0!				#DIV/0!				#DIV/0!
		0	0	#DIV/0!	0	0	#DIV/0!		0	0	#DIV/0!				#DIV/0!				#DIV/0!				#DIV/0!				#DIV/0!				#DIV/0!				#DIV/0!
		0	0	#DIV/0!	0	0	#DIV/0!		0	0	#DIV/0!				#DIV/0!				#DIV/0!				#DIV/0!				#DIV/0!				#DIV/0!				#DIV/0!
		0	0	#DIV/0!	0	0	#DIV/0!		0	0	#DIV/0!				#DIV/0!				#DIV/0!				#DIV/0!				#DIV/0!				#DIV/0!				#DIV/0!
		0	0	#DIV/0!	0	0	#DIV/0!		0	0	#DIV/0!				#DIV/0!				#DIV/0!				#DIV/0!				#DIV/0!				#DIV/0!				#DIV/0!
		0	0	#DIV/0!	0	0	#DIV/0!		0	0	#DIV/0!				#DIV/0!				#DIV/0!				#DIV/0!				#DIV/0!				#DIV/0!				#DIV/0!
		0	0	#DIV/0!	0	0	#DIV/0!		0	0	#DIV/0!				#DIV/0!				#DIV/0!				#DIV/0!				#DIV/0!				#DIV/0!				#DIV/0!
		0	0	#DIV/0!	0	0	#DIV/0!		0	0	#DIV/0!				#DIV/0!				#DIV/0!				#DIV/0!				#DIV/0!				#DIV/0!				#DIV/0!
		0	0	#DIV/0!	0	0	#DIV/0!		0	0	#DIV/0!				#DIV/0!				#DIV/0!				#DIV/0!				#DIV/0!				#DIV/0!				#DIV/0!
		0	0	#DIV/0!	0	0	#DIV/0!		0	0	#DIV/0!				#DIV/0!				#DIV/0!				#DIV/0!				#DIV/0!				#DIV/0!				#DIV/0!
		0	0	#DIV/0!	0	0	#DIV/0!		0	0	#DIV/0!				#DIV/0!				#DIV/0!				#DIV/0!				#DIV/0!				#DIV/0!				#DIV/0!
		0	0	#DIV/0!	0	0	#DIV/0!		0	0	#DIV/0!				#DIV/0!				#DIV/0!				#DIV/0!				#DIV/0!				#DIV/0!				#DIV/0!
		0	0	#DIV/0!	0	0	#DIV/0!		0	0	#DIV/0!				#DIV/0!				#DIV/0!				#DIV/0!				#DIV/0!				#DIV/0!				#DIV/0!
		0	0	#DIV/0!	0	0	#DIV/0!		0	0	#DIV/0!				#DIV/0!				#DIV/0!				#DIV/0!				#DIV/0!				#DIV/0!				#DIV/0!
		0	0	#DIV/0!	0	0	#DIV/0!		0	0	#DIV/0!				#DIV/0!				#DIV/0!				#DIV/0!				#DIV/0!				#DIV/0!				#DIV/0!
		0	0	#DIV/0!	0	0	#DIV/0!		0	0	#DIV/0!				#DIV/0!				#DIV/0!				#DIV/0!				#DIV/0!				#DIV/0!				#DIV/0!
		0	0	#DIV/0!	0	0	#DIV/0!		0	0	#DIV/0!				#DIV/0!				#DIV/0!				#DIV/0!				#DIV/0!				#DIV/0!				#DIV/0!
		0	0	#DIV/0!	0	0	#DIV/0!		0	0	#DIV/0!				#DIV/0!				#DIV/0!				#DIV/0!				#DIV/0!				#DIV/0!				#DIV/0!
		0	0	#DIV/0!	0	0	#DIV/0!		0	0	#DIV/0!				#DIV/0!				#DIV/0!				#DIV/0!				#DIV/0!				#DIV/0!				#DIV/0!
		0	0	#DIV/0!	0	0	#DIV/0!		0	0	#DIV/0!				#DIV/0!				#DIV/0!				#DIV/0!				#DIV/0!				#DIV/0!				#DIV/0!
		0	0	#DIV/0!	0	0	#DIV/0!		0	0	#DIV/0!				#DIV/0!				#DIV/0!				#DIV/0!				#DIV/0!				#DIV/0!				#DIV/0!
		0	0	#DIV/0!	0	0	#DIV/0!		0	0	#DIV/0!				#DIV/0!				#DIV/0!				#DIV/0!				#DIV/0!				#DIV/0!				#DIV/0!
		0	0	#DIV/0!	0	0	#DIV/0!		0	0	#DIV/0!				#DIV/0!				#DIV/0!				#DIV/0!				#DIV/0!				#DIV/0!				#DIV/0!
		0	0	#DIV/0!	0	0	#DIV/0!		0	0	#DIV/0!				#DIV/0!				#DIV/0!				#DIV/0!				#DIV/0!				#DIV/0!				#DIV/0!
		0	0	#DIV/0!	0	0	#DIV/0!		0	0	#DIV/0!				#DIV/0!				#DIV/0!				#DIV/0!				#DIV/0!				#DIV/0!				#DIV/0!
		0	0	#DIV/0!	0	0	#DIV/0!		0	0	#DIV/0!				#DIV/0!				#DIV/0!				#DIV/0!				#DIV/0!				#DIV/0!				#DIV/0!
		0	0	#DIV/0!	0	0	#DIV/0!		0	0	#DIV/0!				#DIV/0!				#DIV/0!				#DIV/0!				#DIV/0!				#DIV/0!				#DIV/0!
		0	0	#DIV/0!	0	0	#DIV/0!		0	0	#DIV/0!				#DIV/0!				#DIV/0!				#DIV/0!				#DIV/0!				#DIV/0!				#DIV/0!
		0	0	#DIV/0!	0	0	#DIV/0!		0	0	#DIV/0!				#DIV/0!				#DIV/0!				#DIV/0!				#DIV/0!				#DIV/0!				#DIV/0!
		0	0	#DIV/0!	0	0	#DIV/0!		0	0	#DIV/0!				#DIV/0!				#DIV/0!				#DIV/0!				#DIV/0!				#DIV/0!				#DIV/0!
		0	0	#DIV/0!	0	0	#DIV/0!		0	0	#DIV/0!				#DIV/0!				#DIV/0!				#DIV/0!				#DIV/0!				#DIV/0!				#DIV/0!
		0	0	#DIV/0!	0	0	#DIV/0!		0	0	#DIV/0!				#DIV/0!				#DIV/0!				#DIV/0!				#DIV/0!				#DIV/0!				#DIV/0!
		0	0	#DIV/0!	0	0	#DIV/0!		0	0	#DIV/0!				#DIV/0!				#DIV/0!				#DIV/0!				#DIV/0!				#DIV/0!				#DIV/0!
		0	0	#DIV/0!	0	0	#DIV/0!		0	0	#DIV/0!				#DIV/0!				#DIV/0!				#DIV/0!				#DIV/0!				#DIV/0!				#DIV/0!
		0	0	#DIV/0!	0	0	#DIV/0!		0	0	#DIV/0!				#DIV/0!				#DIV/0!				#DIV/0!				#DIV/0!				#DIV/0!				#DIV/0!
		0	0	#DIV/0!	0	0	#DIV/0!		0	0	#DIV/0!				#DIV/0!				#DIV/0!				#DIV/0!				#DIV/0!				#DIV/0!				#DIV/0!
		0	0	#DIV/0!	0	0	#DIV/0!		0	0	#DIV/0!				#DIV/0!				#DIV/0!				#DIV/0!				#DIV/0!				#DIV/0!				#DIV/0!
		0	0	#DIV/0!	0	0	#DIV/0!		0	0	#DIV/0!				#DIV/0!				#DIV/0!				#DIV/0!				#DIV/0!				#DIV/0!				#DIV/0!
		0	0	#DIV/0!	0	0	#DIV/0!		0	0	#DIV/0!				#DIV/0!				#DIV/0!				#DIV/0!				#DIV/0!				#DIV/0!				#DIV/0!
		0	0	#DIV/0!	0	0	#DIV/0!		0	0	#DIV/0!				#DIV/0!				#DIV/0!				#DIV/0!				#DIV/0!				#DIV/0!				#DIV/0!
		0	0	#DIV/0!	0	0	#DIV/0!		0	0	#DIV/0!				#DIV/0!				#DIV/0!				#DIV/0!				#DIV/0!				#DIV/0!				#DIV/0!
		0	0	#DIV/0!	0	0	#DIV/0!		0	0	#DIV/0!				#DIV/0!				#DIV/0!				#DIV/0!				#DIV/0!				#DIV/0!				#DIV/0!
		0	0	#DIV/0!	0	0	#DIV/0!		0	0	#DIV/0!				#DIV/0!				#DIV/0!				#DIV/0!				#DIV/0!				#DIV/0!				#DIV/0!
		0	0	#DIV/0!	0	0	#DIV/0!		0	0	#DIV/0!				#DIV/0!				#DIV/0!				#DIV/0!				#DIV/0!				#DIV/0!				#DIV/0!
		0	0	#DIV/0!	0	0	#DIV/0!		0	0	#DIV/0!				#DIV/0!				#DIV/0!				#DIV/0!				#DIV/0!				#DIV/0!				#DIV/0!
		0	0	#DIV/0!	0	0	#DIV/0!		0	0	#DIV/0!				#DIV/0!				#DIV/0!				#DIV/0!				#DIV/0!				#DIV/0!				#DIV/0!
		0	0	#DIV/0!	0	0	#DIV/0!		0	0	#DIV/0!				#DIV/0!				#DIV/0!				#DIV/0!				#DIV/0!				#DIV/0!				#DIV/0!
		0	0	#DIV/0!	0	0	#DIV/0!		0	0	#DIV/0!				#DIV/0!				#DIV/0!				#DIV/0!				#DIV/0!				#DIV/0!				#DIV/0!
		0	0	#DIV/0!	0	0	#DIV/0!		0	0	#DIV/0!				#DIV/0!				#DIV/0!				#DIV/0!				#DIV/0!				#DIV/0!				#DIV/0!
		0	0	#DIV/0!	0	0	#DIV/0!		0	0	#DIV/0!				#DIV/0!				#DIV/0!				#DIV/0!				#DIV/0!				#DIV/0!				#DIV/0!
		0	0	#DIV/0!	0	0	#DIV/0!		0	0	#DIV/0!				#DIV/0!				#DIV/0!				#DIV/0!				#DIV/0!				#DIV/0!				#DIV/0!
		0	0	#DIV/0!	0	0	#DIV/0!		0	0	#DIV/0!				#DIV/0!				#DIV/0!				#DIV/0!				#DIV/0!				#DIV/0!				#DIV/0!
		0	0	#DIV/0!	0	0	#DIV/0!		0	0	#DIV/0!				#DIV/0!				#DIV/0!				#DIV/0!				#DIV/0!				#DIV/0!				#DIV/0!
		0	0	#DIV/0!	0	0	#DIV/0!		0	0	#DIV/0!				#DIV/0!				#DIV/0!				#DIV/0!				#DIV/0!				#DIV/0!				#DIV/0!
		0	0	#DIV/0!	0	0	#DIV/0!		0	0	#DIV/0!				#DIV/0!				#DIV/0!				#DIV/0!				#DIV/0!				#DIV/0!				#DIV/0!
		0	0	#DIV/0!	0	0	#DIV/0!		0	0	#DIV/0!				#DIV/0!				#DIV/0!				#DIV/0!				#DIV/0!				#DIV/0!				#DIV/0!
		0	0	#DIV/0!	0	0	#DIV/0!		0	0	#DIV/0!				#DIV/0!				#DIV/0!				#DIV/0!				#DIV/0!				#DIV/0!				#DIV/0!
		0	0	#DIV/0!	0	0	#DIV/0!		0	0	#DIV/0!				#DIV/0!				#DIV/0!				#DIV/0!				#DIV/0!				#DIV/0!				#DIV/0!
		0	0	#DIV/0!	0	0	#DIV/0!		0	0	#DIV/0!				#DIV/0!				#DIV/0!				#DIV/0!				#DIV/0!				#DIV/0!				#DIV/0!
		0	0	#DIV/0!	0	0	#DIV/0!		0	0	#DIV/0!				#DIV/0!				#DIV/0!				#DIV/0!				#DIV/0!				#DIV/0!				#DIV/0!
		0	0	#DIV/0!	0	0	#DIV/0!		0	0	#DIV/0!				#DIV/0!				#DIV/0!				#DIV/0!				#DIV/0!				#DIV/0!				#DIV/0!
		0	0	#DIV/0!	0	0	#DIV/0!		0	0	#DIV/0!				#DIV/0!				#DIV/0!				#DIV/0!				#DIV/0!				#DIV/0!				#DIV/0!
		0	0	#DIV/0!	0	0	#DIV/0!		0	0	#DIV/0!				#DIV/0!				#DIV/0!				#DIV/0!				#DIV/0!				#DIV/0!				#DIV/0!
		0	0	#DIV/0!	0	0	#DIV/0!		0	0	#DIV/0!				#DIV/0!				#DIV/0!				#DIV/0!				#DIV/0!				#DIV/0!				#DIV/0!
		0	0	#DIV/0!	0	0	#DIV/0!		0	0	#DIV/0!				#DIV/0!				#DIV/0!				#DIV/0!				#DIV/0!				#DIV/0!				#DIV/0!
		0	0	#DIV/0!	0	0	#DIV/0!		0	0	#DIV/0!				#DIV/0!				#DIV/0!				#DIV/0!				#DIV/0!				#DIV/0!				#DIV/0!
		0	0	#DIV/0!	0	0	#DIV/0!		0	0	#DIV/0!				#DIV/0!				#DIV/0!				#DIV/0!				#DIV/0!				#DIV/0!				#DIV/0!
		0	0	#DIV/0!	0	0	#DIV/0!		0	0	#DIV/0!				#DIV/0!				#DIV/0!				#DIV/0!				#DIV/0!				#DIV/0!				#DIV/0!
		0	0	#DIV/0!	0	0	#DIV/0!		0	0	#DIV/0!				#DIV/0!				#DIV/0!				#DIV/0!				#DIV/0!				#DIV/0!				#DIV/0!
		0	0	#DIV/0!	0	0	#DIV/0!		0	0	#DIV/0!				#DIV/0!				#DIV/0!				#DIV/0!				#DIV/0!				#DIV/0!				#DIV/0!
		0	0	#DIV/0!	0	0	#DIV/0!		0	0	#DIV/0!				#DIV/0!				#DIV/0!				#DIV/0!				#DIV/0!				#DIV/0!				#DIV/0!
		0	0	#DIV/0!	0	0	#DIV/0!		0	0	#DIV/0!				#DIV/0!				#DIV/0!				#DIV/0!				#DIV/0!				#DIV/0!				#DIV/0!
		0	0	#DIV/0!	0	0	#DIV/0!		0	0	#DIV/0!				#DIV/0!				#DIV/0!				#DIV/0!				#DIV/0!				#DIV/0!				#DIV/0!
		0	0	#DIV/0!	0	0	#DIV/0!		0	0	#DIV/0!				#DIV/0!				#DIV/0!				#DIV/0!				#DIV/0!				#DIV/0!				#DIV/0!
		0	0	#DIV/0!	0	0	#DIV/0!		0	0	#DIV/0!				#DIV/0!				#DIV/0!				#DIV/0!				#DIV/0!				#DIV/0!				#DIV/0!
		0	0	#DIV/0!	0	0	#DIV/0!		0	0	#DIV/0!				#DIV/0!				#DIV/0!				#DIV/0!				#DIV/0!				#DIV/0!				#DIV/0!
		0	0	#DIV/0!	0	0	#DIV/0!		0	0	#DIV/0!				#DIV/0!				#DIV/0!				#DIV/0!				#DIV/0!				#DIV/0!				#DIV/0!
		0	0	#DIV/0!	0	0	#DIV/0!		0	0	#DIV/0!				#DIV/0!				#DIV/0!				#DIV/0!				#DIV/0!				#DIV/0!				#DIV/0!
		0	0	#DIV/0!	0	0	#DIV/0!		0	0	#DIV/0!				#DIV/0!				#DIV/0!				#DIV/0!				#DIV/0!				#DIV/0!				#DIV/0!
		0	0	#DIV/0!	0	0	#DIV/0!		0	0	#DIV/0!				#DIV/0!				#DIV/0!				#DIV/0!				#DIV/0!				#DIV/0!				#DIV/0!
		0	0	#DIV/0!	0	0	#DIV/0!		0	0	#DIV/0!				#DIV/0!				#DIV/0!				#DIV/0!				#DIV/0!				#DIV/0!				#DIV/0!
		0	0	#DIV/0!	0	0	#DIV/0!		0	0	#DIV/0!				#DIV/0!				#DIV/0!				#DIV/0!				#DIV/0!				#DIV/0!				#DIV/0!
		0	0	#DIV/0!	0	0	#DIV/0!		0	0	#DIV/0!				#DIV/0!				#DIV/0!				#DIV/0!				#DIV/0!				#DIV/0!				#DIV/0!
		0	0	#DIV/0!	0	0	#DIV/0!		0	0	#DIV/0!				#DIV/0!				#DIV/0!				#DIV/0!				#DIV/0!				#DIV/0!				#DIV/0!
		0	0	#DIV/0!	0	0	#DIV/0!		0	0	#DIV/0!				#DIV/0!				#DIV/0!				#DIV/0!				#DIV/0!				#DIV/0!				#DIV/0!
		0	0	#DIV/0!	0	0	#DIV/0!		0	0	#DIV/0!				#DIV/0!				#DIV/0!				#DIV/0!				#DIV/0!				#DIV/0!				#DIV/0!
		0	0	#DIV/0!	0	0	#DIV/0!		0	0	#DIV/0!				#DIV/0!				#DIV/0!				#DIV/0!				#DIV/0!				#DIV/0!				#DIV/0!
		0	0	#DIV/0!	0	0	#DIV/0!		0	0	#DIV/0!				#DIV/0!				#DIV/0!				#DIV/0!				#DIV/0!				#DIV/0!				#DIV/0!
		0	0	#DIV/0!	0	0	#DIV/0!		0	0	#DIV/0!				#DIV/0!				#DIV/0!				#DIV/0!				#DIV/0!				#DIV/0!				#DIV/0!
		0	0	#DIV/0!	0	0	#DIV/0!		0	0	#DIV/0!				#DIV/0!				#DIV/0!				#DIV/0!				#DIV/0!				#DIV/0!				#DIV/0!
		0	0	#DIV/0!	0	0	#DIV/0!		0	0	#DIV/0!				#DIV/0!				#DIV/0!				#DIV/0!				#DIV/0!				#DIV/0!				#DIV/0!
		0	0	#DIV/0!	0	0	#DIV/0!		0	0	#DIV/0!				#DIV/0!				#DIV/0!				#DIV/0!				#DIV/0!				#DIV/0!				#DIV/0!
		0	0	#DIV/0!	0	0	#DIV/0!		0	0	#DIV/0!				#DIV/0!				#DIV/0!				#DIV/0!				#DIV/0!				#DIV/0!				#DIV/0!
		0	0	#DIV/0!	0	0	#DIV/0!		0	0	#DIV/0!				#DIV/0!				#DIV/0!				#DIV/0!				#DIV/0!				#DIV/0!				#DIV/0!
		0	0	#DIV/0!	0	0	#DIV/0!		0	0	#DIV/0!				#DIV/0!				#DIV/0!				#DIV/0!				#DIV/0!				#DIV/0!				#DIV/0!
		0	0	#DIV/0!	0	0	#DIV/0!		0	0	#DIV/0!				#DIV/0!				#DIV/0!				#DIV/0!				#DIV/0!				#DIV/0!				#DIV/0!
		0	0	#DIV/0!	0	0	#DIV/0!		0	0	#DIV/0!				#DIV/0!				#DIV/0!				#DIV/0!				#DIV/0!				#DIV/0!				#DIV/0!
		0	0	#DIV/0!	0	0	#DIV/0!		0	0	#DIV/0!				#DIV/0!				#DIV/0!				#DIV/0!				#DIV/0!				#DIV/0!				#DIV/0!
		0	0	#DIV/0!	0	0	#DIV/0!		0	0	#DIV/0!				#DIV/0!				#DIV/0!				#DIV/0!				#DIV/0!				#DIV/0!				#DIV/0!
		0	0	#DIV/0!	0	0	#DIV/0!		0	0	#DIV/0!				#DIV/0!				#DIV/0!				#DIV/0!				#DIV/0!				#DIV/0!				#DIV/0!
		0	0	#DIV/0!	0	0	#DIV/0!		0	0	#DIV/0!				#DIV/0!				#DIV/0!				#DIV/0!				#DIV/0!				#DIV/0!				#DIV/0!
		0	0	#DIV/0!	0	0	#DIV/0!		0	0	#DIV/0!				#DIV/0!				#DIV/0!				#DIV/0!				#DIV/0!				#DIV/0!				#DIV/0!
		0	0	#DIV/0!	0	0	#DIV/0!		0	0	#DIV/0!				#DIV/0!				#DIV/0!				#DIV/0!				#DIV/0!				#DIV/0!				#DIV/0!
		0	0	#DIV/0!	0	0	#DIV/0!		0	0	#DIV/0!				#DIV/0!				#DIV/0!				#DIV/0!				#DIV/0!				#DIV/0!				#DIV/0!
		0	0	#DIV/0!	0	0	#DIV/0!		0	0	#DIV/0!				#DIV/0!				#DIV/0!				#DIV/0!				#DIV/0!				#DIV/0!				#DIV/0!
		0	0	#DIV/0!	0	0	#DIV/0!		0	0	#DIV/0!				#DIV/0!				#DIV/0!				#DIV/0!				#DIV/0!				#DIV/0!				#DIV/0!
		0	0	#DIV/0!	0	0	#DIV/0!		0	0	#DIV/0!				#DIV/0!				#DIV/0!				#DIV/0!				#DIV/0!				#DIV/0!				#DIV/0!
		0	0	#DIV/0!	0	0	#DIV/0!		0	0	#DIV/0!				#DIV/0!				#DIV/0!				#DIV/0!				#DIV/0!				#DIV/0!				#DIV/0!
		0	0	#DIV/0!	0	0	#DIV/0!		0	0	#DIV/0!				#DIV/0!				#DIV/0!				#DIV/0!				#DIV/0!				#DIV/0!				#DIV/0!
		0	0	#DIV/0!	0	0	#DIV/0!		0	0	#DIV/0!				#DIV/0!				#DIV/0!				#DIV/0!				#DIV/0!				#DIV/0!				#DIV/0!
		0	0	#DIV/0!	0	0	#DIV/0!		0	0	#DIV/0!				#DIV/0!				#DIV/0!				#DIV/0!				#DIV/0!				#DIV/0!				#DIV/0!
		0	0	#DIV/0!	0	0	#DIV/0!		0	0	#DIV/0!				#DIV/0!				#DIV/0!				#DIV/0!				#DIV/0!				#DIV/0!				#DIV/0!
		0	0	#DIV/0!	0	0	#DIV/0!		0	0	#DIV/0!				#DIV/0!				#DIV/0!				#DIV/0!				#DIV/0!				#DIV/0!				#DIV/0!
		0	0	#DIV/0!	0	0	#DIV/0!		0	0	#DIV/0!				#DIV/0!				#DIV/0!				#DIV/0!				#DIV/0!				#DIV/0!				#DIV/0!
		0	0	#DIV/0!	0	0	#DIV/0!		0	0	#DIV/0!				#DIV/0!				#DIV/0!				#DIV/0!				#DIV/0!				#DIV/0!				#DIV/0!
		0	0	#DIV/0!	0	0	#DIV/0!		0	0	#DIV/0!				#DIV/0!				#DIV/0!				#DIV/0!				#DIV/0!				#DIV/0!				#DIV/0!
		0	0	#DIV/0!	0	0	#DIV/0!		0	0	#DIV/0!				#DIV/0!				#DIV/0!				#DIV/0!				#DIV/0!				#DIV/0!				#DIV/0!
		0	0	#DIV/0!	0	0	#DIV/0!		0	0	#DIV/0!				#DIV/0!				#DIV/0!				#DIV/0!				#DIV/0!				#DIV/0!				#DIV/0!
		0	0	#DIV/0!	0	0	#DIV/0!		0	0	#DIV/0!				#DIV/0!				#DIV/0!				#DIV/0!				#DIV/0!				#DIV/0!				#DIV/0!
		0	0	#DIV/0!	0	0	#DIV/0!		0	0	#DIV/0!				#DIV/0!				#DIV/0!				#DIV/0!				#DIV/0!				#DIV/0!				#DIV/0!
		0	0	#DIV/0!	0	0	#DIV/0!		0	0	#DIV/0!				#DIV/0!				#DIV/0!				#DIV/0!				#DIV/0!				#DIV/0!				#DIV/0!
		0	0	#DIV/0!	0	0	#DIV/0!		0	0	#DIV/0!				#DIV/0!				#DIV/0!				#DIV/0!				#DIV/0!				#DIV/0!				#DIV/0!
		0	0	#DIV/0!	0	0	#DIV/0!		0	0	#DIV/0!				#DIV/0!				#DIV/0!				#DIV/0!				#DIV/0!				#DIV/0!				#DIV/0!
		0	0	#DIV/0!	0	0	#DIV/0!		0	0	#DIV/0!				#DIV/0!				#DIV/0!				#DIV/0!				#DIV/0!				#DIV/0!				#DIV/0!
		0	0	#DIV/0!	0	0	#DIV/0!		0	0	#DIV/0!				#DIV/0!				#DIV/0!				#DIV/0!				#DIV/0!				#DIV/0!				#DIV/0!
		0	0	#DIV/0!	0	0	#DIV/0!		0	0	#DIV/0!				#DIV/0!				#DIV/0!				#DIV/0!				#DIV/0!				#DIV/0!				#DIV/0!
		0	0	#DIV/0!	0	0	#DIV/0!		0	0	#DIV/0!				#DIV/0!				#DIV/0!				#DIV/0!				#DIV/0!				#DIV/0!				#DIV/0!
		0	0	#DIV/0!	0	0	#DIV/0!		0	0	#DIV/0!				#DIV/0!				#DIV/0!				#DIV/0!				#DIV/0!				#DIV/0!				#DIV/0!
		0	0	#DIV/0!	0	0	#DIV/0!		0	0	#DIV/0!				#DIV/0!				#DIV/0!				#DIV/0!				#DIV/0!				#DIV/0!				#DIV/0!
		0	0	#DIV/0!	0	0	#DIV/0!		0	0	#DIV/0!				#DIV/0!				#DIV/0!				#DIV/0!				#DIV/0!				#DIV/0!				#DIV/0!
		0	0	#DIV/0!	0	0	#DIV/0!		0	0	#DIV/0!				#DIV/0!				#DIV/0!				#DIV/0!				#DIV/0!				#DIV/0!				#DIV/0!
		0	0	#DIV/0!	0	0	#DIV/0!		0	0	#DIV/0!				#DIV/0!				#DIV/0!				#DIV/0!				#DIV/0!				#DIV/0!				#DIV/0!
		0	0	#DIV/0!	0	0	#DIV/0!		0	0	#DIV/0!				#DIV/0!				#DIV/0!				#DIV/0!				#DIV/0!				#DIV/0!				#DIV/0!
		0	0	#DIV/0!	0	0	#DIV/0!		0	0	#DIV/0!				#DIV/0!				#DIV/0!				#DIV/0!				#DIV/0!				#DIV/0!				#DIV/0!
		0	0	#DIV/0!	0	0	#DIV/0!		0	0	#DIV/0!				#DIV/0!				#DIV/0!				#DIV/0!				#DIV/0!				#DIV/0!				#DIV/0!
		0	0	#DIV/0!	0	0	#DIV/0!		0	0	#DIV/0!				#DIV/0!				#DIV/0!				#DIV/0!				#DIV/0!				#DIV/0!				#DIV/0!
		0	0	#DIV/0!	0	0	#DIV/0!		0	0	#DIV/0!				#DIV/0!				#DIV/0!				#DIV/0!				#DIV/0!				#DIV/0!				#DIV/0!
		0	0	#DIV/0!	0	0	#DIV/0!		0	0	#DIV/0!				#DIV/0!				#DIV/0!				#DIV/0!				#DIV/0!				#DIV/0!				#DIV/0!
		0	0	#DIV/0!	0	0	#DIV/0!		0	0	#DIV/0!				#DIV/0!				#DIV/0!				#DIV/0!				#DIV/0!				#DIV/0!				#DIV/0!
		0	0	#DIV/0!	0	0	#DIV/0!		0	0	#DIV/0!				#DIV/0!				#DIV/0!				#DIV/0!				#DIV/0!				#DIV/0!				#DIV/0!
		0	0	#DIV/0!	0	0	#DIV/0!		0	0	#DIV/0!				#DIV/0!				#DIV/0!				#DIV/0!				#DIV/0!				#DIV/0!				#DIV/0!
		0	0	#DIV/0!	0	0	#DIV/0!		0	0	#DIV/0!				#DIV/0!				#DIV/0!				#DIV/0!				#DIV/0!				#DIV/0!				#DIV/0!
		0	0	#DIV/0!	0	0	#DIV/0!		0	0	#DIV/0!				#DIV/0!				#DIV/0!				#DIV/0!				#DIV/0!				#DIV/0!				#DIV/0!
		0	0	#DIV/0!	0	0	#DIV/0!		0	0	#DIV/0!				#DIV/0!				#DIV/0!				#DIV/0!				#DIV/0!				#DIV/0!				#DIV/0!
		0	0	#DIV/0!	0	0	#DIV/0!		0	0	#DIV/0!				#DIV/0!				#DIV/0!				#DIV/0!				#DIV/0!				#DIV/0!				#DIV/0!
		0	0	#DIV/0!	0	0	#DIV/0!		0	0	#DIV/0!				#DIV/0!				#DIV/0!				#DIV/0!				#DIV/0!				#DIV/0!				#DIV/0!
		0	0	#DIV/0!	0	0	#DIV/0!		0	0	#DIV/0!				#DIV/0!				#DIV/0!				#DIV/0!				#DIV/0!				#DIV/0!				#DIV/0!
		0	0	#DIV/0!	0	0	#DIV/0!		0	0	#DIV/0!				#DIV/0!				#DIV/0!				#DIV/0!				#DIV/0!				#DIV/0!				#DIV/0!
		0	0	#DIV/0!	0	0	#DIV/0!		0	0	#DIV/0!				#DIV/0!				#DIV/0!				#DIV/0!				#DIV/0!				#DIV/0!				#DIV/0!
		0	0	#DIV/0!	0	0	#DIV/0!		0	0	#DIV/0!				#DIV/0!				#DIV/0!				#DIV/0!				#DIV/0!				#DIV/0!				#DIV/0!
		0	0	#DIV/0!	0	0	#DIV/0!		0	0	#DIV/0!				#DIV/0!				#DIV/0!				#DIV/0!				#DIV/0!				#DIV/0!				#DIV/0!
		0	0	#DIV/0!	0	0	#DIV/0!		0	0	#DIV/0!				#DIV/0!				#DIV/0!				#DIV/0!				#DIV/0!				#DIV/0!				#DIV/0!
		0	0	#DIV/0!	0	0	#DIV/0!		0	0	#DIV/0!				#DIV/0!				#DIV/0!				#DIV/0!				#DIV/0!				#DIV/0!				#DIV/0!
		0	0	#DIV/0!	0	0	#DIV/0!		0	0	#DIV/0!				#DIV/0!				#DIV/0!				#DIV/0!				#DIV/0!				#DIV/0!				#DIV/0!
		0	0	#DIV/0!	0	0	#DIV/0!		0	0	#DIV/0!				#DIV/0!				#DIV/0!				#DIV/0!				#DIV/0!				#DIV/0!				#DIV/0!
		0	0	#DIV/0!	0	0	#DIV/0!		0	0	#DIV/0!				#DIV/0!				#DIV/0!				#DIV/0!				#DIV/0!				#DIV/0!				#DIV/0!
		0	0	#DIV/0!	0	0	#DIV/0!		0	0	#DIV/0!				#DIV/0!				#DIV/0!				#DIV/0!				#DIV/0!				#DIV/0!				#DIV/0!
		0	0	#DIV/0!	0	0	#DIV/0!		0	0	#DIV/0!				#DIV/0!				#DIV/0!				#DIV/0!				#DIV/0!				#DIV/0!				#DIV/0!
		0	0	#DIV/0!	0	0	#DIV/0!		0	0	#DIV/0!				#DIV/0!				#DIV/0!				#DIV/0!				#DIV/0!				#DIV/0!				#DIV/0!
		0	0	#DIV/0!	0	0	#DIV/0!		0	0	#DIV/0!				#DIV/0!				#DIV/0!				#DIV/0!				#DIV/0!				#DIV/0!				#DIV/0!
		0	0	#DIV/0!	0	0	#DIV/0!		0	0	#DIV/0!				#DIV/0!				#DIV/0!				#DIV/0!				#DIV/0!				#DIV/0!				#DIV/0!
		0	0	#DIV/0!	0	0	#DIV/0!		0	0	#DIV/0!				#DIV/0!				#DIV/0!				#DIV/0!				#DIV/0!				#DIV/0!				#DIV/0!
		0	0	#DIV/0!	0	0	#DIV/0!		0	0	#DIV/0!				#DIV/0!				#DIV/0!				#DIV/0!				#DIV/0!				#DIV/0!				#DIV/0!
		0	0	#DIV/0!	0	0	#DIV/0!		0	0	#DIV/0!				#DIV/0!				#DIV/0!				#DIV/0!				#DIV/0!				#DIV/0!				#DIV/0!
		0	0	#DIV/0!	0	0	#DIV/0!		0	0	#DIV/0!				#DIV/0!				#DIV/0!				#DIV/0!				#DIV/0!				#DIV/0!				#DIV/0!
		0	0	#DIV/0!	0	0	#DIV/0!		0	0	#DIV/0!				#DIV/0!				#DIV/0!				#DIV/0!				#DIV/0!				#DIV/0!				#DIV/0!
		0	0	#DIV/0!	0	0	#DIV/0!		0	0	#DIV/0!				#DIV/0!				#DIV/0!				#DIV/0!				#DIV/0!				#DIV/0!				#DIV/0!
		0	0	#DIV/0!	0	0	#DIV/0!		0	0	#DIV/0!				#DIV/0!				#DIV/0!				#DIV/0!				#DIV/0!				#DIV/0!				#DIV/0!
		0	0	#DIV/0!	0	0	#DIV/0!		0	0	#DIV/0!				#DIV/0!				#DIV/0!				#DIV/0!				#DIV/0!				#DIV/0!				#DIV/0!
		0	0	#DIV/0!	0	0	#DIV/0!		0	0	#DIV/0!				#DIV/0!				#DIV/0!				#DIV/0!				#DIV/0!				#DIV/0!				#DIV/0!
		0	0	#DIV/0!	0	0	#DIV/0!		0	0	#DIV/0!				#DIV/0!				#DIV/0!				#DIV/0!				#DIV/0!				#DIV/0!				#DIV/0!
		0	0	#DIV/0!	0	0	#DIV/0!		0	0	#DIV/0!				#DIV/0!				#DIV/0!				#DIV/0!				#DIV/0!				#DIV/0!				#DIV/0!
		0	0	#DIV/0!	0	0	#DIV/0!		0	0	#DIV/0!				#DIV/0!				#DIV/0!				#DIV/0!				#DIV/0!				#DIV/0!				#DIV/0!
		0	0	#DIV/0!	0	0	#DIV/0!		0	0	#DIV/0!				#DIV/0!				#DIV/0!				#DIV/0!				#DIV/0!				#DIV/0!				#DIV/0!
		0	0	#DIV/0!	0	0	#DIV/0!		0	0	#DIV/0!				#DIV/0!				#DIV/0!				#DIV/0!				#DIV/0!				#DIV/0!				#DIV/0!
		0	0	#DIV/0!	0	0	#DIV/0!		0	0	#DIV/0!				#DIV/0!				#DIV/0!				#DIV/0!				#DIV/0!				#DIV/0!				#DIV/0!
		0	0	#DIV/0!	0	0	#DIV/0!		0	0	#DIV/0!				#DIV/0!				#DIV/0!				#DIV/0!				#DIV/0!				#DIV/0!				#DIV/0!
		0	0	#DIV/0!	0	0	#DIV/0!		0	0	#DIV/0!				#DIV/0!				#DIV/0!				#DIV/0!				#DIV/0!				#DIV/0!				#DIV/0!
		0	0	#DIV/0!	0	0	#DIV/0!		0	0	#DIV/0!				#DIV/0!				#DIV/0!				#DIV/0!				#DIV/0!				#DIV/0!				#DIV/0!
		0	0	#DIV/0!	0	0	#DIV/0!		0	0	#DIV/0!				#DIV/0!				#DIV/0!				#DIV/0!				#DIV/0!				#DIV/0!				#DIV/0!
		0	0	#DIV/0!	0	0	#DIV/0!		0	0	#DIV/0!				#DIV/0!				#DIV/0!				#DIV/0!				#DIV/0!				#DIV/0!				#DIV/0!
		0	0	#DIV/0!	0	0	#DIV/0!		0	0	#DIV/0!				#DIV/0!				#DIV/0!				#DIV/0!				#DIV/0!				#DIV/0!				#DIV/0!
		0	0	#DIV/0!	0	0	#DIV/0!		0	0	#DIV/0!				#DIV/0!				#DIV/0!				#DIV/0!				#DIV/0!				#DIV/0!				#DIV/0!
		0	0	#DIV/0!	0	0	#DIV/0!		0	0	#DIV/0!				#DIV/0!				#DIV/0!				#DIV/0!				#DIV/0!				#DIV/0!				#DIV/0!
		0	0	#DIV/0!	0	0	#DIV/0!		0	0	#DIV/0!				#DIV/0!				#DIV/0!				#DIV/0!				#DIV/0!				#DIV/0!				#DIV/0!
		0	0	#DIV/0!	0	0	#DIV/0!		0	0	#DIV/0!				#DIV/0!				#DIV/0!				#DIV/0!				#DIV/0!				#DIV/0!				#DIV/0!
		0	0	#DIV/0!	0	0	#DIV/0!		0	0	#DIV/0!				#DIV/0!				#DIV/0!				#DIV/0!				#DIV/0!				#DIV/0!				#DIV/0!
		0	0	#DIV/0!	0	0	#DIV/0!		0	0	#DIV/0!				#DIV/0!				#DIV/0!				#DIV/0!				#DIV/0!				#DIV/0!				#DIV/0!
		0	0	#DIV/0!	0	0	#DIV/0!		0	0	#DIV/0!				#DIV/0!				#DIV/0!				#DIV/0!				#DIV/0!				#DIV/0!				#DIV/0!
		0	0	#DIV/0!	0	0	#DIV/0!		0	0	#DIV/0!				#DIV/0!				#DIV/0!				#DIV/0!				#DIV/0!				#DIV/0!				#DIV/0!
		0	0	#DIV/0!	0	0	#DIV/0!		0	0	#DIV/0!				#DIV/0!				#DIV/0!				#DIV/0!				#DIV/0!				#DIV/0!				#DIV/0!
		0	0	#DIV/0!	0	0	#DIV/0!		0	0	#DIV/0!				#DIV/0!				#DIV/0!				#DIV/0!				#DIV/0!				#DIV/0!				#DIV/0!
		0	0	#DIV/0!	0	0	#DIV/0!		0	0	#DIV/0!				#DIV/0!				#DIV/0!				#DIV/0!				#DIV/0!				#DIV/0!				#DIV/0!
		0	0	#DIV/0!	0	0	#DIV/0!		0	0	#DIV/0!				#DIV/0!				#DIV/0!				#DIV/0!				#DIV/0!				#DIV/0!				#DIV/0!
		0	0	#DIV/0!	0	0	#DIV/0!		0	0	#DIV/0!				#DIV/0!				#DIV/0!				#DIV/0!				#DIV/0!				#DIV/0!				#DIV/0!
		0	0	#DIV/0!	0	0	#DIV/0!		0	0	#DIV/0!				#DIV/0!				#DIV/0!				#DIV/0!				#DIV/0!				#DIV/0!				#DIV/0!
		0	0	#DIV/0!	0	0	#DIV/0!		0	0	#DIV/0!				#DIV/0!				#DIV/0!				#DIV/0!				#DIV/0!				#DIV/0!				#DIV/0!
		0	0	#DIV/0!	0	0	#DIV/0!		0	0	#DIV/0!				#DIV/0!				#DIV/0!				#DIV/0!				#DIV/0!				#DIV/0!				#DIV/0!
		0	0	#DIV/0!	0	0	#DIV/0!		0	0	#DIV/0!				#DIV/0!				#DIV/0!				#DIV/0!				#DIV/0!				#DIV/0!				#DIV/0!
		0	0	#DIV/0!	0	0	#DIV/0!		0	0	#DIV/0!				#DIV/0!				#DIV/0!				#DIV/0!				#DIV/0!				#DIV/0!				#DIV/0!
		0	0	#DIV/0!	0	0	#DIV/0!		0	0	#DIV/0!				#DIV/0!				#DIV/0!				#DIV/0!				#DIV/0!				#DIV/0!				#DIV/0!
		0	0	#DIV/0!	0	0	#DIV/0!		0	0	#DIV/0!				#DIV/0!				#DIV/0!				#DIV/0!				#DIV/0!				#DIV/0!				#DIV/0!
		0	0	#DIV/0!	0	0	#DIV/0!		0	0	#DIV/0!				#DIV/0!				#DIV/0!				#DIV/0!				#DIV/0!				#DIV/0!				#DIV/0!
		0	0	#DIV/0!	0	0	#DIV/0!		0	0	#DIV/0!				#DIV/0!				#DIV/0!				#DIV/0!				#DIV/0!				#DIV/0!				#DIV/0!
		0	0	#DIV/0!	0	0	#DIV/0!		0	0	#DIV/0!				#DIV/0!				#DIV/0!				#DIV/0!				#DIV/0!				#DIV/0!				#DIV/0!
		0	0	#DIV/0!	0	0	#DIV/0!		0	0	#DIV/0!				#DIV/0!				#DIV/0!				#DIV/0!				#DIV/0!				#DIV/0!				#DIV/0!
		0	0	#DIV/0!	0	0	#DIV/0!		0	0	#DIV/0!				#DIV/0!				#DIV/0!				#DIV/0!				#DIV/0!				#DIV/0!				#DIV/0!
		0	0	#DIV/0!	0	0	#DIV/0!		0	0	#DIV/0!				#DIV/0!				#DIV/0!				#DIV/0!				#DIV/0!				#DIV/0!				#DIV/0!
		0	0	#DIV/0!	0	0	#DIV/0!		0	0	#DIV/0!				#DIV/0!				#DIV/0!				#DIV/0!				#DIV/0!				#DIV/0!				#DIV/0!
		0	0	#DIV/0!	0	0	#DIV/0!		0	0	#DIV/0!				#DIV/0!				#DIV/0!				#DIV/0!				#DIV/0!				#DIV/0!				#DIV/0!
		0	0	#DIV/0!	0	0	#DIV/0!		0	0	#DIV/0!				#DIV/0!				#DIV/0!				#DIV/0!				#DIV/0!				#DIV/0!				#DIV/0!
		0	0	#DIV/0!	0	0	#DIV/0!		0	0	#DIV/0!				#DIV/0!				#DIV/0!				#DIV/0!				#DIV/0!				#DIV/0!				#DIV/0!
		0	0	#DIV/0!	0	0	#DIV/0!		0	0	#DIV/0!				#DIV/0!				#DIV/0!				#DIV/0!				#DIV/0!				#DIV/0!				#DIV/0!
		0	0	#DIV/0!	0	0	#DIV/0!		0	0	#DIV/0!				#DIV/0!				#DIV/0!				#DIV/0!				#DIV/0!				#DIV/0!				#DIV/0!
		0	0	#DIV/0!	0	0	#DIV/0!		0	0	#DIV/0!				#DIV/0!				#DIV/0!				#DIV/0!				#DIV/0!				#DIV/0!				#DIV/0!
		0	0	#DIV/0!	0	0	#DIV/0!		0	0	#DIV/0!				#DIV/0!				#DIV/0!				#DIV/0!				#DIV/0!				#DIV/0!				#DIV/0!
		0	0	#DIV/0!	0	0	#DIV/0!		0	0	#DIV/0!				#DIV/0!				#DIV/0!				#DIV/0!				#DIV/0!				#DIV/0!				#DIV/0!
		0	0	#DIV/0!	0	0	#DIV/0!		0	0	#DIV/0!				#DIV/0!				#DIV/0!				#DIV/0!				#DIV/0!				#DIV/0!				#DIV/0!
		0	0	#DIV/0!	0	0	#DIV/0!		0	0	#DIV/0!				#DIV/0!				#DIV/0!				#DIV/0!				#DIV/0!				#DIV/0!				#DIV/0!
		0	0	#DIV/0!	0	0	#DIV/0!		0	0	#DIV/0!				#DIV/0!				#DIV/0!				#DIV/0!				#DIV/0!				#DIV/0!				#DIV/0!
		0	0	#DIV/0!	0	0	#DIV/0!		0	0	#DIV/0!				#DIV/0!				#DIV/0!				#DIV/0!				#DIV/0!				#DIV/0!				#DIV/0!
		0	0	#DIV/0!	0	0	#DIV/0!		0	0	#DIV/0!				#DIV/0!				#DIV/0!				#DIV/0!				#DIV/0!				#DIV/0!				#DIV/0!
		0	0	#DIV/0!	0	0	#DIV/0!		0	0	#DIV/0!				#DIV/0!				#DIV/0!				#DIV/0!				#DIV/0!				#DIV/0!				#DIV/0!
		0	0	#DIV/0!	0	0	#DIV/0!		0	0	#DIV/0!				#DIV/0!				#DIV/0!				#DIV/0!				#DIV/0!				#DIV/0!				#DIV/0!
		0	0	#DIV/0!	0	0	#DIV/0!		0	0	#DIV/0!				#DIV/0!				#DIV/0!				#DIV/0!				#DIV/0!				#DIV/0!				#DIV/0!
		0	0	#DIV/0!	0	0	#DIV/0!		0	0	#DIV/0!				#DIV/0!				#DIV/0!				#DIV/0!				#DIV/0!				#DIV/0!				#DIV/0!
		0	0	#DIV/0!	0	0	#DIV/0!		0	0	#DIV/0!				#DIV/0!				#DIV/0!				#DIV/0!				#DIV/0!				#DIV/0!				#DIV/0!
		0	0	#DIV/0!	0	0	#DIV/0!		0	0	#DIV/0!				#DIV/0!				#DIV/0!				#DIV/0!				#DIV/0!				#DIV/0!				#DIV/0!
		0	0	#DIV/0!	0	0	#DIV/0!		0	0	#DIV/0!				#DIV/0!				#DIV/0!				#DIV/0!				#DIV/0!				#DIV/0!				#DIV/0!
		0	0	#DIV/0!	0	0	#DIV/0!		0	0	#DIV/0!				#DIV/0!				#DIV/0!				#DIV/0!				#DIV/0!				#DIV/0!				#DIV/0!
		0	0	#DIV/0!	0	0	#DIV/0!		0	0	#DIV/0!				#DIV/0!				#DIV/0!				#DIV/0!				#DIV/0!				#DIV/0!				#DIV/0!
		0	0	#DIV/0!	0	0	#DIV/0!		0	0	#DIV/0!				#DIV/0!				#DIV/0!				#DIV/0!				#DIV/0!				#DIV/0!				#DIV/0!
		0	0	#DIV/0!	0	0	#DIV/0!		0	0	#DIV/0!				#DIV/0!				#DIV/0!				#DIV/0!				#DIV/0!				#DIV/0!				#DIV/0!
		0	0	#DIV/0!	0	0	#DIV/0!		0	0	#DIV/0!				#DIV/0!				#DIV/0!				#DIV/0!				#DIV/0!				#DIV/0!				#DIV/0!
		0	0	#DIV/0!	0	0	#DIV/0!		0	0	#DIV/0!				#DIV/0!				#DIV/0!				#DIV/0!				#DIV/0!				#DIV/0!				#DIV/0!
		0	0	#DIV/0!	0	0	#DIV/0!		0	0	#DIV/0!				#DIV/0!				#DIV/0!				#DIV/0!				#DIV/0!				#DIV/0!				#DIV/0!
		0	0	#DIV/0!	0	0	#DIV/0!		0	0	#DIV/0!				#DIV/0!				#DIV/0!				#DIV/0!				#DIV/0!				#DIV/0!				#DIV/0!
		0	0	#DIV/0!	0	0	#DIV/0!		0	0	#DIV/0!				#DIV/0!				#DIV/0!				#DIV/0!				#DIV/0!				#DIV/0!				#DIV/0!
		0	0	#DIV/0!	0	0	#DIV/0!		0	0	#DIV/0!				#DIV/0!				#DIV/0!				#DIV/0!				#DIV/0!				#DIV/0!				#DIV/0!
		0	0	#DIV/0!	0	0	#DIV/0!		0	0	#DIV/0!				#DIV/0!				#DIV/0!				#DIV/0!				#DIV/0!				#DIV/0!				#DIV/0!
		0	0	#DIV/0!	0	0	#DIV/0!		0	0	#DIV/0!				#DIV/0!				#DIV/0!				#DIV/0!				#DIV/0!				#DIV/0!				#DIV/0!
		0	0	#DIV/0!	0	0	#DIV/0!		0	0	#DIV/0!				#DIV/0!				#DIV/0!				#DIV/0!				#DIV/0!				#DIV/0!				#DIV/0!
		0	0	#DIV/0!	0	0	#DIV/0!		0	0	#DIV/0!				#DIV/0!				#DIV/0!				#DIV/0!				#DIV/0!				#DIV/0!				#DIV/0!
		0	0	#DIV/0!	0	0	#DIV/0!		0	0	#DIV/0!				#DIV/0!				#DIV/0!				#DIV/0!				#DIV/0!				#DIV/0!				#DIV/0!
		0	0	#DIV/0!	0	0	#DIV/0!		0	0	#DIV/0!				#DIV/0!				#DIV/0!				#DIV/0!				#DIV/0!				#DIV/0!				#DIV/0!
		0	0	#DIV/0!	0	0	#DIV/0!		0	0	#DIV/0!				#DIV/0!				#DIV/0!				#DIV/0!				#DIV/0!				#DIV/0!				#DIV/0!
		0	0	#DIV/0!	0	0	#DIV/0!		0	0	#DIV/0!				#DIV/0!				#DIV/0!				#DIV/0!				#DIV/0!				#DIV/0!				#DIV/0!
		0	0	#DIV/0!	0	0	#DIV/0!		0	0	#DIV/0!				#DIV/0!				#DIV/0!				#DIV/0!				#DIV/0!				#DIV/0!				#DIV/0!
		0	0	#DIV/0!	0	0	#DIV/0!		0	0	#DIV/0!				#DIV/0!				#DIV/0!				#DIV/0!				#DIV/0!				#DIV/0!				#DIV/0!
		0	0	#DIV/0!	0	0	#DIV/0!		0	0	#DIV/0!				#DIV/0!				#DIV/0!				#DIV/0!				#DIV/0!				#DIV/0!				#DIV/0!
		0	0	#DIV/0!	0	0	#DIV/0!		0	0	#DIV/0!				#DIV/0!				#DIV/0!				#DIV/0!				#DIV/0!				#DIV/0!				#DIV/0!
		0	0	#DIV/0!	0	0	#DIV/0!		0	0	#DIV/0!				#DIV/0!				#DIV/0!				#DIV/0!				#DIV/0!				#DIV/0!				#DIV/0!
		0	0	#DIV/0!	0	0	#DIV/0!		0	0	#DIV/0!				#DIV/0!				#DIV/0!				#DIV/0!				#DIV/0!				#DIV/0!				#DIV/0!
		0	0	#DIV/0!	0	0	#DIV/0!		0	0	#DIV/0!				#DIV/0!				#DIV/0!				#DIV/0!				#DIV/0!				#DIV/0!				#DIV/0!
		0	0	#DIV/0!	0	0	#DIV/0!		0	0	#DIV/0!				#DIV/0!				#DIV/0!				#DIV/0!				#DIV/0!				#DIV/0!				#DIV/0!
		0	0	#DIV/0!	0	0	#DIV/0!		0	0	#DIV/0!				#DIV/0!				#DIV/0!				#DIV/0!				#DIV/0!				#DIV/0!				#DIV/0!
		0	0	#DIV/0!	0	0	#DIV/0!		0	0	#DIV/0!				#DIV/0!				#DIV/0!				#DIV/0!				#DIV/0!				#DIV/0!				#DIV/0!
		0	0	#DIV/0!	0	0	#DIV/0!		0	0	#DIV/0!				#DIV/0!				#DIV/0!				#DIV/0!				#DIV/0!				#DIV/0!				#DIV/0!
		0	0	#DIV/0!	0	0	#DIV/0!		0	0	#DIV/0!				#DIV/0!				#DIV/0!				#DIV/0!				#DIV/0!				#DIV/0!				#DIV/0!
		0	0	#DIV/0!	0	0	#DIV/0!		0	0	#DIV/0!				#DIV/0!				#DIV/0!				#DIV/0!				#DIV/0!				#DIV/0!				#DIV/0!
		0	0	#DIV/0!	0	0	#DIV/0!		0	0	#DIV/0!				#DIV/0!				#DIV/0!				#DIV/0!				#DIV/0!				#DIV/0!				#DIV/0!
		0	0	#DIV/0!	0	0	#DIV/0!		0	0	#DIV/0!				#DIV/0!				#DIV/0!				#DIV/0!				#DIV/0!				#DIV/0!				#DIV/0!
		0	0	#DIV/0!	0	0	#DIV/0!		0	0	#DIV/0!				#DIV/0!				#DIV/0!				#DIV/0!				#DIV/0!				#DIV/0!				#DIV/0!
		0	0	#DIV/0!	0	0	#DIV/0!		0	0	#DIV/0!				#DIV/0!				#DIV/0!				#DIV/0!				#DIV/0!				#DIV/0!				#DIV/0!
		0	0	#DIV/0!	0	0	#DIV/0!		0	0	#DIV/0!				#DIV/0!				#DIV/0!				#DIV/0!				#DIV/0!				#DIV/0!				#DIV/0!
		0	0	#DIV/0!	0	0	#DIV/0!		0	0	#DIV/0!				#DIV/0!				#DIV/0!				#DIV/0!				#DIV/0!				#DIV/0!				#DIV/0!
		0	0	#DIV/0!	0	0	#DIV/0!		0	0	#DIV/0!				#DIV/0!				#DIV/0!				#DIV/0!				#DIV/0!				#DIV/0!				#DIV/0!
		0	0	#DIV/0!	0	0	#DIV/0!		0	0	#DIV/0!				#DIV/0!				#DIV/0!				#DIV/0!				#DIV/0!				#DIV/0!				#DIV/0!
		0	0	#DIV/0!	0	0	#DIV/0!		0	0	#DIV/0!				#DIV/0!				#DIV/0!				#DIV/0!				#DIV/0!				#DIV/0!				#DIV/0!
		0	0	#DIV/0!	0	0	#DIV/0!		0	0	#DIV/0!				#DIV/0!				#DIV/0!				#DIV/0!				#DIV/0!				#DIV/0!				#DIV/0!
		0	0	#DIV/0!	0	0	#DIV/0!		0	0	#DIV/0!				#DIV/0!				#DIV/0!				#DIV/0!				#DIV/0!				#DIV/0!				#DIV/0!
		0	0	#DIV/0!	0	0	#DIV/0!		0	0	#DIV/0!				#DIV/0!				#DIV/0!				#DIV/0!				#DIV/0!				#DIV/0!				#DIV/0!
		0	0	#DIV/0!	0	0	#DIV/0!		0	0	#DIV/0!				#DIV/0!				#DIV/0!				#DIV/0!				#DIV/0!				#DIV/0!				#DIV/0!
		0	0	#DIV/0!	0	0	#DIV/0!		0	0	#DIV/0!				#DIV/0!				#DIV/0!				#DIV/0!				#DIV/0!				#DIV/0!				#DIV/0!
		0	0	#DIV/0!	0	0	#DIV/0!		0	0	#DIV/0!				#DIV/0!				#DIV/0!				#DIV/0!				#DIV/0!				#DIV/0!				#DIV/0!
		0	0	#DIV/0!	0	0	#DIV/0!		0	0	#DIV/0!				#DIV/0!				#DIV/0!				#DIV/0!				#DIV/0!				#DIV/0!				#DIV/0!
		0	0	#DIV/0!	0	0	#DIV/0!		0	0	#DIV/0!				#DIV/0!				#DIV/0!				#DIV/0!				#DIV/0!				#DIV/0!				#DIV/0!
		0	0	#DIV/0!	0	0	#DIV/0!		0	0	#DIV/0!				#DIV/0!				#DIV/0!				#DIV/0!				#DIV/0!				#DIV/0!				#DIV/0!
		0	0	#DIV/0!	0	0	#DIV/0!		0	0	#DIV/0!				#DIV/0!				#DIV/0!				#DIV/0!				#DIV/0!				#DIV/0!				#DIV/0!
		0	0	#DIV/0!	0	0	#DIV/0!		0	0	#DIV/0!				#DIV/0!				#DIV/0!				#DIV/0!				#DIV/0!				#DIV/0!				#DIV/0!
		0	0	#DIV/0!	0	0	#DIV/0!		0	0	#DIV/0!				#DIV/0!				#DIV/0!				#DIV/0!				#DIV/0!				#DIV/0!				#DIV/0!
		0	0	#DIV/0!	0	0	#DIV/0!		0	0	#DIV/0!				#DIV/0!				#DIV/0!				#DIV/0!				#DIV/0!				#DIV/0!				#DIV/0!
		0	0	#DIV/0!	0	0	#DIV/0!		0	0	#DIV/0!				#DIV/0!				#DIV/0!				#DIV/0!				#DIV/0!				#DIV/0!				#DIV/0!
		0	0	#DIV/0!	0	0	#DIV/0!		0	0	#DIV/0!				#DIV/0!				#DIV/0!				#DIV/0!				#DIV/0!				#DIV/0!				#DIV/0!
		0	0	#DIV/0!	0	0	#DIV/0!		0	0	#DIV/0!				#DIV/0!				#DIV/0!				#DIV/0!				#DIV/0!				#DIV/0!				#DIV/0!
		0	0	#DIV/0!	0	0	#DIV/0!		0	0	#DIV/0!				#DIV/0!				#DIV/0!				#DIV/0!				#DIV/0!				#DIV/0!				#DIV/0!
		0	0	#DIV/0!	0	0	#DIV/0!		0	0	#DIV/0!				#DIV/0!				#DIV/0!				#DIV/0!				#DIV/0!				#DIV/0!				#DIV/0!
		0	0	#DIV/0!	0	0	#DIV/0!		0	0	#DIV/0!				#DIV/0!				#DIV/0!				#DIV/0!				#DIV/0!				#DIV/0!				#DIV/0!
		0	0	#DIV/0!	0	0	#DIV/0!		0	0	#DIV/0!				#DIV/0!				#DIV/0!				#DIV/0!				#DIV/0!				#DIV/0!				#DIV/0!
		0	0	#DIV/0!	0	0	#DIV/0!		0	0	#DIV/0!				#DIV/0!				#DIV/0!				#DIV/0!				#DIV/0!				#DIV/0!				#DIV/0!
		0	0	#DIV/0!	0	0	#DIV/0!		0	0	#DIV/0!				#DIV/0!				#DIV/0!				#DIV/0!				#DIV/0!				#DIV/0!				#DIV/0!
		0	0	#DIV/0!	0	0	#DIV/0!		0	0	#DIV/0!				#DIV/0!				#DIV/0!				#DIV/0!				#DIV/0!				#DIV/0!				#DIV/0!
		0	0	#DIV/0!	0	0	#DIV/0!		0	0	#DIV/0!				#DIV/0!				#DIV/0!				#DIV/0!				#DIV/0!				#DIV/0!				#DIV/0!
		0	0	#DIV/0!	0	0	#DIV/0!		0	0	#DIV/0!				#DIV/0!				#DIV/0!				#DIV/0!				#DIV/0!				#DIV/0!				#DIV/0!
		0	0	#DIV/0!	0	0	#DIV/0!		0	0	#DIV/0!				#DIV/0!				#DIV/0!				#DIV/0!				#DIV/0!				#DIV/0!				#DIV/0!
		0	0	#DIV/0!	0	0	#DIV/0!		0	0	#DIV/0!				#DIV/0!				#DIV/0!				#DIV/0!				#DIV/0!				#DIV/0!				#DIV/0!
		0	0	#DIV/0!	0	0	#DIV/0!		0	0	#DIV/0!				#DIV/0!				#DIV/0!				#DIV/0!				#DIV/0!				#DIV/0!				#DIV/0!
		0	0	#DIV/0!	0	0	#DIV/0!		0	0	#DIV/0!				#DIV/0!				#DIV/0!				#DIV/0!				#DIV/0!				#DIV/0!				#DIV/0!
		0	0	#DIV/0!	0	0	#DIV/0!		0	0	#DIV/0!				#DIV/0!				#DIV/0!				#DIV/0!				#DIV/0!				#DIV/0!				#DIV/0!
		0	0	#DIV/0!	0	0	#DIV/0!		0	0	#DIV/0!				#DIV/0!				#DIV/0!				#DIV/0!				#DIV/0!				#DIV/0!				#DIV/0!
		0	0	#DIV/0!	0	0	#DIV/0!		0	0	#DIV/0!				#DIV/0!				#DIV/0!				#DIV/0!				#DIV/0!				#DIV/0!				#DIV/0!
		0	0	#DIV/0!	0	0	#DIV/0!		0	0	#DIV/0!				#DIV/0!				#DIV/0!				#DIV/0!				#DIV/0!				#DIV/0!				#DIV/0!
		0	0	#DIV/0!	0	0	#DIV/0!		0	0	#DIV/0!				#DIV/0!				#DIV/0!				#DIV/0!				#DIV/0!				#DIV/0!				#DIV/0!
		0	0	#DIV/0!	0	0	#DIV/0!		0	0	#DIV/0!				#DIV/0!				#DIV/0!				#DIV/0!				#DIV/0!				#DIV/0!				#DIV/0!
		0	0	#DIV/0!	0	0	#DIV/0!		0	0	#DIV/0!				#DIV/0!				#DIV/0!				#DIV/0!				#DIV/0!				#DIV/0!				#DIV/0!
		0	0	#DIV/0!	0	0	#DIV/0!		0	0	#DIV/0!				#DIV/0!				#DIV/0!				#DIV/0!				#DIV/0!				#DIV/0!				#DIV/0!
		0	0	#DIV/0!	0	0	#DIV/0!		0	0	#DIV/0!				#DIV/0!				#DIV/0!				#DIV/0!				#DIV/0!				#DIV/0!				#DIV/0!
		0	0	#DIV/0!	0	0	#DIV/0!		0	0	#DIV/0!				#DIV/0!				#DIV/0!				#DIV/0!				#DIV/0!				#DIV/0!				#DIV/0!
		0	0	#DIV/0!	0	0	#DIV/0!		0	0	#DIV/0!				#DIV/0!				#DIV/0!				#DIV/0!				#DIV/0!				#DIV/0!				#DIV/0!
		0	0	#DIV/0!	0	0	#DIV/0!		0	0	#DIV/0!				#DIV/0!				#DIV/0!				#DIV/0!				#DIV/0!				#DIV/0!				#DIV/0!
		0	0	#DIV/0!	0	0	#DIV/0!		0	0	#DIV/0!				#DIV/0!				#DIV/0!				#DIV/0!				#DIV/0!				#DIV/0!				#DIV/0!
		0	0	#DIV/0!	0	0	#DIV/0!		0	0	#DIV/0!				#DIV/0!				#DIV/0!				#DIV/0!				#DIV/0!				#DIV/0!				#DIV/0!
		0	0	#DIV/0!	0	0	#DIV/0!		0	0	#DIV/0!				#DIV/0!				#DIV/0!				#DIV/0!				#DIV/0!				#DIV/0!				#DIV/0!
		0	0	#DIV/0!	0	0	#DIV/0!		0	0	#DIV/0!				#DIV/0!				#DIV/0!				#DIV/0!				#DIV/0!				#DIV/0!				#DIV/0!
		0	0	#DIV/0!	0	0	#DIV/0!		0	0	#DIV/0!				#DIV/0!				#DIV/0!				#DIV/0!				#DIV/0!				#DIV/0!				#DIV/0!
		0	0	#DIV/0!	0	0	#DIV/0!		0	0	#DIV/0!				#DIV/0!				#DIV/0!				#DIV/0!				#DIV/0!				#DIV/0!				#DIV/0!
		0	0	#DIV/0!	0	0	#DIV/0!		0	0	#DIV/0!				#DIV/0!				#DIV/0!				#DIV/0!				#DIV/0!				#DIV/0!				#DIV/0!
		0	0	#DIV/0!	0	0	#DIV/0!		0	0	#DIV/0!				#DIV/0!				#DIV/0!				#DIV/0!				#DIV/0!				#DIV/0!				#DIV/0!
		0	0	#DIV/0!	0	0	#DIV/0!		0	0	#DIV/0!				#DIV/0!				#DIV/0!				#DIV/0!				#DIV/0!				#DIV/0!				#DIV/0!
		0	0	#DIV/0!	0	0	#DIV/0!		0	0	#DIV/0!				#DIV/0!				#DIV/0!				#DIV/0!				#DIV/0!				#DIV/0!				#DIV/0!
		0	0	#DIV/0!	0	0	#DIV/0!		0	0	#DIV/0!				#DIV/0!				#DIV/0!				#DIV/0!				#DIV/0!				#DIV/0!				#DIV/0!
		0	0	#DIV/0!	0	0	#DIV/0!		0	0	#DIV/0!				#DIV/0!				#DIV/0!				#DIV/0!				#DIV/0!				#DIV/0!				#DIV/0!
		0	0	#DIV/0!	0	0	#DIV/0!		0	0	#DIV/0!				#DIV/0!				#DIV/0!				#DIV/0!				#DIV/0!				#DIV/0!				#DIV/0!
		0	0	#DIV/0!	0	0	#DIV/0!		0	0	#DIV/0!				#DIV/0!				#DIV/0!				#DIV/0!				#DIV/0!				#DIV/0!				#DIV/0!
		0	0	#DIV/0!	0	0	#DIV/0!		0	0	#DIV/0!				#DIV/0!				#DIV/0!				#DIV/0!				#DIV/0!				#DIV/0!				#DIV/0!
		0	0	#DIV/0!	0	0	#DIV/0!		0	0	#DIV/0!				#DIV/0!				#DIV/0!				#DIV/0!				#DIV/0!				#DIV/0!				#DIV/0!
		0	0	#DIV/0!	0	0	#DIV/0!		0	0	#DIV/0!				#DIV/0!				#DIV/0!				#DIV/0!				#DIV/0!				#DIV/0!				#DIV/0!
		0	0	#DIV/0!	0	0	#DIV/0!		0	0	#DIV/0!				#DIV/0!				#DIV/0!				#DIV/0!				#DIV/0!				#DIV/0!				#DIV/0!
		0	0	#DIV/0!	0	0	#DIV/0!		0	0	#DIV/0!				#DIV/0!				#DIV/0!				#DIV/0!				#DIV/0!				#DIV/0!				#DIV/0!
		0	0	#DIV/0!	0	0	#DIV/0!		0	0	#DIV/0!				#DIV/0!				#DIV/0!				#DIV/0!				#DIV/0!				#DIV/0!				#DIV/0!
		0	0	#DIV/0!	0	0	#DIV/0!		0	0	#DIV/0!				#DIV/0!				#DIV/0!				#DIV/0!				#DIV/0!				#DIV/0!				#DIV/0!
		0	0	#DIV/0!	0	0	#DIV/0!		0	0	#DIV/0!				#DIV/0!				#DIV/0!				#DIV/0!				#DIV/0!				#DIV/0!				#DIV/0!
		0	0	#DIV/0!	0	0	#DIV/0!		0	0	#DIV/0!				#DIV/0!				#DIV/0!				#DIV/0!				#DIV/0!				#DIV/0!				#DIV/0!
		0	0	#DIV/0!	0	0	#DIV/0!		0	0	#DIV/0!				#DIV/0!				#DIV/0!				#DIV/0!				#DIV/0!				#DIV/0!				#DIV/0!
		0	0	#DIV/0!	0	0	#DIV/0!		0	0	#DIV/0!				#DIV/0!				#DIV/0!				#DIV/0!				#DIV/0!				#DIV/0!				#DIV/0!
		0	0	#DIV/0!	0	0	#DIV/0!		0	0	#DIV/0!				#DIV/0!				#DIV/0!				#DIV/0!				#DIV/0!				#DIV/0!				#DIV/0!
		0	0	#DIV/0!	0	0	#DIV/0!		0	0	#DIV/0!				#DIV/0!				#DIV/0!				#DIV/0!				#DIV/0!				#DIV/0!				#DIV/0!
		0	0	#DIV/0!	0	0	#DIV/0!		0	0	#DIV/0!				#DIV/0!				#DIV/0!				#DIV/0!				#DIV/0!				#DIV/0!				#DIV/0!
		0	0	#DIV/0!	0	0	#DIV/0!		0	0	#DIV/0!				#DIV/0!				#DIV/0!				#DIV/0!				#DIV/0!				#DIV/0!				#DIV/0!
		0	0	#DIV/0!	0	0	#DIV/0!		0	0	#DIV/0!				#DIV/0!				#DIV/0!				#DIV/0!				#DIV/0!				#DIV/0!				#DIV/0!
		0	0	#DIV/0!	0	0	#DIV/0!		0	0	#DIV/0!				#DIV/0!				#DIV/0!				#DIV/0!				#DIV/0!				#DIV/0!				#DIV/0!
		0	0	#DIV/0!	0	0	#DIV/0!		0	0	#DIV/0!				#DIV/0!				#DIV/0!				#DIV/0!				#DIV/0!				#DIV/0!				#DIV/0!
		0	0	#DIV/0!	0	0	#DIV/0!		0	0	#DIV/0!				#DIV/0!				#DIV/0!				#DIV/0!				#DIV/0!				#DIV/0!				#DIV/0!
		0	0	#DIV/0!	0	0	#DIV/0!		0	0	#DIV/0!				#DIV/0!				#DIV/0!				#DIV/0!				#DIV/0!				#DIV/0!				#DIV/0!
		0	0	#DIV/0!	0	0	#DIV/0!		0	0	#DIV/0!				#DIV/0!				#DIV/0!				#DIV/0!				#DIV/0!				#DIV/0!				#DIV/0!
		0	0	#DIV/0!	0	0	#DIV/0!		0	0	#DIV/0!				#DIV/0!				#DIV/0!				#DIV/0!				#DIV/0!				#DIV/0!				#DIV/0!
		0	0	#DIV/0!	0	0	#DIV/0!		0	0	#DIV/0!				#DIV/0!				#DIV/0!				#DIV/0!				#DIV/0!				#DIV/0!				#DIV/0!
		0	0	#DIV/0!	0	0	#DIV/0!		0	0	#DIV/0!				#DIV/0!				#DIV/0!				#DIV/0!				#DIV/0!				#DIV/0!				#DIV/0!
		0	0	#DIV/0!	0	0	#DIV/0!		0	0	#DIV/0!				#DIV/0!				#DIV/0!				#DIV/0!				#DIV/0!				#DIV/0!				#DIV/0!
		0	0	#DIV/0!	0	0	#DIV/0!		0	0	#DIV/0!				#DIV/0!				#DIV/0!				#DIV/0!				#DIV/0!				#DIV/0!				#DIV/0!
		0	0	#DIV/0!	0	0	#DIV/0!		0	0	#DIV/0!				#DIV/0!				#DIV/0!				#DIV/0!				#DIV/0!				#DIV/0!				#DIV/0!
		0	0	#DIV/0!	0	0	#DIV/0!		0	0	#DIV/0!				#DIV/0!				#DIV/0!				#DIV/0!				#DIV/0!				#DIV/0!				#DIV/0!
		0	0	#DIV/0!	0	0	#DIV/0!		0	0	#DIV/0!				#DIV/0!				#DIV/0!				#DIV/0!				#DIV/0!				#DIV/0!				#DIV/0!
		0	0	#DIV/0!	0	0	#DIV/0!		0	0	#DIV/0!				#DIV/0!				#DIV/0!				#DIV/0!				#DIV/0!				#DIV/0!				#DIV/0!
		0	0	#DIV/0!	0	0	#DIV/0!		0	0	#DIV/0!				#DIV/0!				#DIV/0!				#DIV/0!				#DIV/0!				#DIV/0!				#DIV/0!
		0	0	#DIV/0!	0	0	#DIV/0!		0	0	#DIV/0!				#DIV/0!				#DIV/0!				#DIV/0!				#DIV/0!				#DIV/0!				#DIV/0!
		0	0	#DIV/0!	0	0	#DIV/0!		0	0	#DIV/0!				#DIV/0!				#DIV/0!				#DIV/0!				#DIV/0!				#DIV/0!				#DIV/0!
		0	0	#DIV/0!	0	0	#DIV/0!		0	0	#DIV/0!				#DIV/0!				#DIV/0!				#DIV/0!				#DIV/0!				#DIV/0!				#DIV/0!
		0	0	#DIV/0!	0	0	#DIV/0!		0	0	#DIV/0!				#DIV/0!				#DIV/0!				#DIV/0!				#DIV/0!				#DIV/0!				#DIV/0!
		0	0	#DIV/0!	0	0	#DIV/0!		0	0	#DIV/0!				#DIV/0!				#DIV/0!				#DIV/0!				#DIV/0!				#DIV/0!				#DIV/0!
		0	0	#DIV/0!	0	0	#DIV/0!		0	0	#DIV/0!				#DIV/0!				#DIV/0!				#DIV/0!				#DIV/0!				#DIV/0!				#DIV/0!
		0	0	#DIV/0!	0	0	#DIV/0!		0	0	#DIV/0!				#DIV/0!				#DIV/0!				#DIV/0!				#DIV/0!				#DIV/0!				#DIV/0!
		0	0	#DIV/0!	0	0	#DIV/0!		0	0	#DIV/0!				#DIV/0!				#DIV/0!				#DIV/0!				#DIV/0!				#DIV/0!				#DIV/0!
		0	0	#DIV/0!	0	0	#DIV/0!		0	0	#DIV/0!				#DIV/0!				#DIV/0!				#DIV/0!				#DIV/0!				#DIV/0!				#DIV/0!
		0	0	#DIV/0!	0	0	#DIV/0!		0	0	#DIV/0!				#DIV/0!				#DIV/0!				#DIV/0!				#DIV/0!				#DIV/0!				#DIV/0!
		0	0	#DIV/0!	0	0	#DIV/0!		0	0	#DIV/0!				#DIV/0!				#DIV/0!				#DIV/0!				#DIV/0!				#DIV/0!				#DIV/0!
		0	0	#DIV/0!	0	0	#DIV/0!		0	0	#DIV/0!				#DIV/0!				#DIV/0!				#DIV/0!				#DIV/0!				#DIV/0!				#DIV/0!
		0	0	#DIV/0!	0	0	#DIV/0!		0	0	#DIV/0!				#DIV/0!				#DIV/0!				#DIV/0!				#DIV/0!				#DIV/0!				#DIV/0!
		0	0	#DIV/0!	0	0	#DIV/0!		0	0	#DIV/0!				#DIV/0!				#DIV/0!				#DIV/0!				#DIV/0!				#DIV/0!				#DIV/0!
		0	0	#DIV/0!	0	0	#DIV/0!		0	0	#DIV/0!				#DIV/0!				#DIV/0!				#DIV/0!				#DIV/0!				#DIV/0!				#DIV/0!
		0	0	#DIV/0!	0	0	#DIV/0!		0	0	#DIV/0!				#DIV/0!				#DIV/0!				#DIV/0!				#DIV/0!				#DIV/0!				#DIV/0!
		0	0	#DIV/0!	0	0	#DIV/0!		0	0	#DIV/0!				#DIV/0!				#DIV/0!				#DIV/0!				#DIV/0!				#DIV/0!				#DIV/0!
		0	0	#DIV/0!	0	0	#DIV/0!		0	0	#DIV/0!				#DIV/0!				#DIV/0!				#DIV/0!				#DIV/0!				#DIV/0!				#DIV/0!
		0	0	#DIV/0!	0	0	#DIV/0!		0	0	#DIV/0!				#DIV/0!				#DIV/0!				#DIV/0!				#DIV/0!				#DIV/0!				#DIV/0!
		0	0	#DIV/0!	0	0	#DIV/0!		0	0	#DIV/0!				#DIV/0!				#DIV/0!				#DIV/0!				#DIV/0!				#DIV/0!				#DIV/0!
		0	0	#DIV/0!	0	0	#DIV/0!		0	0	#DIV/0!				#DIV/0!				#DIV/0!				#DIV/0!				#DIV/0!				#DIV/0!				#DIV/0!
		0	0	#DIV/0!	0	0	#DIV/0!		0	0	#DIV/0!				#DIV/0!				#DIV/0!				#DIV/0!				#DIV/0!				#DIV/0!				#DIV/0!
		0	0	#DIV/0!	0	0	#DIV/0!		0	0	#DIV/0!				#DIV/0!				#DIV/0!				#DIV/0!				#DIV/0!				#DIV/0!				#DIV/0!
		0	0	#DIV/0!	0	0	#DIV/0!		0	0	#DIV/0!				#DIV/0!				#DIV/0!				#DIV/0!				#DIV/0!				#DIV/0!				#DIV/0!
		0	0	#DIV/0!	0	0	#DIV/0!		0	0	#DIV/0!				#DIV/0!				#DIV/0!				#DIV/0!				#DIV/0!				#DIV/0!				#DIV/0!
		0	0	#DIV/0!	0	0	#DIV/0!		0	0	#DIV/0!				#DIV/0!				#DIV/0!				#DIV/0!				#DIV/0!				#DIV/0!				#DIV/0!
		0	0	#DIV/0!	0	0	#DIV/0!		0	0	#DIV/0!				#DIV/0!				#DIV/0!				#DIV/0!				#DIV/0!				#DIV/0!				#DIV/0!
		0	0	#DIV/0!	0	0	#DIV/0!		0	0	#DIV/0!				#DIV/0!				#DIV/0!				#DIV/0!				#DIV/0!				#DIV/0!				#DIV/0!
		0	0	#DIV/0!	0	0	#DIV/0!		0	0	#DIV/0!				#DIV/0!				#DIV/0!				#DIV/0!				#DIV/0!				#DIV/0!				#DIV/0!
		0	0	#DIV/0!	0	0	#DIV/0!		0	0	#DIV/0!				#DIV/0!				#DIV/0!				#DIV/0!				#DIV/0!				#DIV/0!				#DIV/0!
		0	0	#DIV/0!	0	0	#DIV/0!		0	0	#DIV/0!				#DIV/0!				#DIV/0!				#DIV/0!				#DIV/0!				#DIV/0!				#DIV/0!
		0	0	#DIV/0!	0	0	#DIV/0!		0	0	#DIV/0!				#DIV/0!				#DIV/0!				#DIV/0!				#DIV/0!				#DIV/0!				#DIV/0!
		0	0	#DIV/0!	0	0	#DIV/0!		0	0	#DIV/0!				#DIV/0!				#DIV/0!				#DIV/0!				#DIV/0!				#DIV/0!				#DIV/0!
		0	0	#DIV/0!	0	0	#DIV/0!		0	0	#DIV/0!				#DIV/0!				#DIV/0!				#DIV/0!				#DIV/0!				#DIV/0!				#DIV/0!
		0	0	#DIV/0!	0	0	#DIV/0!		0	0	#DIV/0!				#DIV/0!				#DIV/0!				#DIV/0!				#DIV/0!				#DIV/0!				#DIV/0!
		0	0	#DIV/0!	0	0	#DIV/0!		0	0	#DIV/0!				#DIV/0!				#DIV/0!				#DIV/0!				#DIV/0!				#DIV/0!				#DIV/0!
		0	0	#DIV/0!	0	0	#DIV/0!		0	0	#DIV/0!				#DIV/0!				#DIV/0!				#DIV/0!				#DIV/0!				#DIV/0!				#DIV/0!
		0	0	#DIV/0!	0	0	#DIV/0!		0	0	#DIV/0!				#DIV/0!				#DIV/0!				#DIV/0!				#DIV/0!				#DIV/0!				#DIV/0!
		0	0	#DIV/0!	0	0	#DIV/0!		0	0	#DIV/0!				#DIV/0!				#DIV/0!				#DIV/0!				#DIV/0!				#DIV/0!				#DIV/0!
		0	0	#DIV/0!	0	0	#DIV/0!		0	0	#DIV/0!				#DIV/0!				#DIV/0!				#DIV/0!				#DIV/0!				#DIV/0!				#DIV/0!
		0	0	#DIV/0!	0	0	#DIV/0!		0	0	#DIV/0!				#DIV/0!				#DIV/0!				#DIV/0!				#DIV/0!				#DIV/0!				#DIV/0!
		0	0	#DIV/0!	0	0	#DIV/0!		0	0	#DIV/0!				#DIV/0!				#DIV/0!				#DIV/0!				#DIV/0!				#DIV/0!				#DIV/0!
		0	0	#DIV/0!	0	0	#DIV/0!		0	0	#DIV/0!				#DIV/0!				#DIV/0!				#DIV/0!				#DIV/0!				#DIV/0!				#DIV/0!
		0	0	#DIV/0!	0	0	#DIV/0!		0	0	#DIV/0!				#DIV/0!				#DIV/0!				#DIV/0!				#DIV/0!				#DIV/0!				#DIV/0!
		0	0	#DIV/0!	0	0	#DIV/0!		0	0	#DIV/0!				#DIV/0!				#DIV/0!				#DIV/0!				#DIV/0!				#DIV/0!				#DIV/0!
		0	0	#DIV/0!	0	0	#DIV/0!		0	0	#DIV/0!				#DIV/0!				#DIV/0!				#DIV/0!				#DIV/0!				#DIV/0!				#DIV/0!
		0	0	#DIV/0!	0	0	#DIV/0!		0	0	#DIV/0!				#DIV/0!				#DIV/0!				#DIV/0!				#DIV/0!				#DIV/0!				#DIV/0!
		0	0	#DIV/0!	0	0	#DIV/0!		0	0	#DIV/0!				#DIV/0!				#DIV/0!				#DIV/0!				#DIV/0!				#DIV/0!				#DIV/0!
		0	0	#DIV/0!	0	0	#DIV/0!		0	0	#DIV/0!				#DIV/0!				#DIV/0!				#DIV/0!				#DIV/0!				#DIV/0!				#DIV/0!
		0	0	#DIV/0!	0	0	#DIV/0!		0	0	#DIV/0!				#DIV/0!				#DIV/0!				#DIV/0!				#DIV/0!				#DIV/0!				#DIV/0!
		0	0	#DIV/0!	0	0	#DIV/0!		0	0	#DIV/0!				#DIV/0!				#DIV/0!				#DIV/0!				#DIV/0!				#DIV/0!				#DIV/0!
		0	0	#DIV/0!	0	0	#DIV/0!		0	0	#DIV/0!				#DIV/0!				#DIV/0!				#DIV/0!				#DIV/0!				#DIV/0!				#DIV/0!
		0	0	#DIV/0!	0	0	#DIV/0!		0	0	#DIV/0!				#DIV/0!				#DIV/0!				#DIV/0!				#DIV/0!				#DIV/0!				#DIV/0!
		0	0	#DIV/0!	0	0	#DIV/0!		0	0	#DIV/0!				#DIV/0!				#DIV/0!				#DIV/0!				#DIV/0!				#DIV/0!				#DIV/0!
		0	0	#DIV/0!	0	0	#DIV/0!		0	0	#DIV/0!				#DIV/0!				#DIV/0!				#DIV/0!				#DIV/0!				#DIV/0!				#DIV/0!
		0	0	#DIV/0!	0	0	#DIV/0!		0	0	#DIV/0!				#DIV/0!				#DIV/0!				#DIV/0!				#DIV/0!				#DIV/0!				#DIV/0!
		0	0	#DIV/0!	0	0	#DIV/0!		0	0	#DIV/0!				#DIV/0!				#DIV/0!				#DIV/0!				#DIV/0!				#DIV/0!				#DIV/0!
		0	0	#DIV/0!	0	0	#DIV/0!		0	0	#DIV/0!				#DIV/0!				#DIV/0!				#DIV/0!				#DIV/0!				#DIV/0!				#DIV/0!
		0	0	#DIV/0!	0	0	#DIV/0!		0	0	#DIV/0!				#DIV/0!				#DIV/0!				#DIV/0!				#DIV/0!				#DIV/0!				#DIV/0!
		0	0	#DIV/0!	0	0	#DIV/0!		0	0	#DIV/0!				#DIV/0!				#DIV/0!				#DIV/0!				#DIV/0!				#DIV/0!				#DIV/0!
		0	0	#DIV/0!	0	0	#DIV/0!		0	0	#DIV/0!				#DIV/0!				#DIV/0!				#DIV/0!				#DIV/0!				#DIV/0!				#DIV/0!
		0	0	#DIV/0!	0	0	#DIV/0!		0	0	#DIV/0!				#DIV/0!				#DIV/0!				#DIV/0!				#DIV/0!				#DIV/0!				#DIV/0!
		0	0	#DIV/0!	0	0	#DIV/0!		0	0	#DIV/0!				#DIV/0!				#DIV/0!				#DIV/0!				#DIV/0!				#DIV/0!				#DIV/0!
		0	0	#DIV/0!	0	0	#DIV/0!		0	0	#DIV/0!				#DIV/0!				#DIV/0!				#DIV/0!				#DIV/0!				#DIV/0!				#DIV/0!
		0	0	#DIV/0!	0	0	#DIV/0!		0	0	#DIV/0!				#DIV/0!				#DIV/0!				#DIV/0!				#DIV/0!				#DIV/0!				#DIV/0!
		0	0	#DIV/0!	0	0	#DIV/0!		0	0	#DIV/0!				#DIV/0!				#DIV/0!				#DIV/0!				#DIV/0!				#DIV/0!				#DIV/0!
		0	0	#DIV/0!	0	0	#DIV/0!		0	0	#DIV/0!				#DIV/0!				#DIV/0!				#DIV/0!				#DIV/0!				#DIV/0!				#DIV/0!
		0	0	#DIV/0!	0	0	#DIV/0!		0	0	#DIV/0!				#DIV/0!				#DIV/0!				#DIV/0!				#DIV/0!				#DIV/0!				#DIV/0!
		0	0	#DIV/0!	0	0	#DIV/0!		0	0	#DIV/0!				#DIV/0!				#DIV/0!				#DIV/0!				#DIV/0!				#DIV/0!				#DIV/0!
		0	0	#DIV/0!	0	0	#DIV/0!		0	0	#DIV/0!				#DIV/0!				#DIV/0!				#DIV/0!				#DIV/0!				#DIV/0!				#DIV/0!
		0	0	#DIV/0!	0	0	#DIV/0!		0	0	#DIV/0!				#DIV/0!				#DIV/0!				#DIV/0!				#DIV/0!				#DIV/0!				#DIV/0!
		0	0	#DIV/0!	0	0	#DIV/0!		0	0	#DIV/0!				#DIV/0!				#DIV/0!				#DIV/0!				#DIV/0!				#DIV/0!				#DIV/0!
		0	0	#DIV/0!	0	0	#DIV/0!		0	0	#DIV/0!				#DIV/0!				#DIV/0!				#DIV/0!				#DIV/0!				#DIV/0!				#DIV/0!
		0	0	#DIV/0!	0	0	#DIV/0!		0	0	#DIV/0!				#DIV/0!				#DIV/0!				#DIV/0!				#DIV/0!				#DIV/0!				#DIV/0!
		0	0	#DIV/0!	0	0	#DIV/0!		0	0	#DIV/0!				#DIV/0!				#DIV/0!				#DIV/0!				#DIV/0!				#DIV/0!				#DIV/0!
		0	0	#DIV/0!	0	0	#DIV/0!		0	0	#DIV/0!				#DIV/0!				#DIV/0!				#DIV/0!				#DIV/0!				#DIV/0!				#DIV/0!
		0	0	#DIV/0!	0	0	#DIV/0!		0	0	#DIV/0!				#DIV/0!				#DIV/0!				#DIV/0!				#DIV/0!				#DIV/0!				#DIV/0!
		0	0	#DIV/0!	0	0	#DIV/0!		0	0	#DIV/0!				#DIV/0!				#DIV/0!				#DIV/0!				#DIV/0!				#DIV/0!				#DIV/0!
		0	0	#DIV/0!	0	0	#DIV/0!		0	0	#DIV/0!				#DIV/0!				#DIV/0!				#DIV/0!				#DIV/0!				#DIV/0!				#DIV/0!
		0	0	#DIV/0!	0	0	#DIV/0!		0	0	#DIV/0!				#DIV/0!				#DIV/0!				#DIV/0!				#DIV/0!				#DIV/0!				#DIV/0!
		0	0	#DIV/0!	0	0	#DIV/0!		0	0	#DIV/0!				#DIV/0!				#DIV/0!				#DIV/0!				#DIV/0!				#DIV/0!				#DIV/0!
		0	0	#DIV/0!	0	0	#DIV/0!		0	0	#DIV/0!				#DIV/0!				#DIV/0!				#DIV/0!				#DIV/0!				#DIV/0!				#DIV/0!
		0	0	#DIV/0!	0	0	#DIV/0!		0	0	#DIV/0!				#DIV/0!				#DIV/0!				#DIV/0!				#DIV/0!				#DIV/0!				#DIV/0!
		0	0	#DIV/0!	0	0	#DIV/0!		0	0	#DIV/0!				#DIV/0!				#DIV/0!				#DIV/0!				#DIV/0!				#DIV/0!				#DIV/0!
		0	0	#DIV/0!	0	0	#DIV/0!		0	0	#DIV/0!				#DIV/0!				#DIV/0!				#DIV/0!				#DIV/0!				#DIV/0!				#DIV/0!
		0	0	#DIV/0!	0	0	#DIV/0!		0	0	#DIV/0!				#DIV/0!				#DIV/0!				#DIV/0!				#DIV/0!				#DIV/0!				#DIV/0!
		0	0	#DIV/0!	0	0	#DIV/0!		0	0	#DIV/0!				#DIV/0!				#DIV/0!				#DIV/0!				#DIV/0!				#DIV/0!				#DIV/0!
		0	0	#DIV/0!	0	0	#DIV/0!		0	0	#DIV/0!				#DIV/0!				#DIV/0!				#DIV/0!				#DIV/0!				#DIV/0!				#DIV/0!
		0	0	#DIV/0!	0	0	#DIV/0!		0	0	#DIV/0!				#DIV/0!				#DIV/0!				#DIV/0!				#DIV/0!				#DIV/0!				#DIV/0!
		0	0	#DIV/0!	0	0	#DIV/0!		0	0	#DIV/0!				#DIV/0!				#DIV/0!				#DIV/0!				#DIV/0!				#DIV/0!				#DIV/0!
		0	0	#DIV/0!	0	0	#DIV/0!		0	0	#DIV/0!				#DIV/0!				#DIV/0!				#DIV/0!				#DIV/0!				#DIV/0!				#DIV/0!
		0	0	#DIV/0!	0	0	#DIV/0!		0	0	#DIV/0!				#DIV/0!				#DIV/0!				#DIV/0!				#DIV/0!				#DIV/0!				#DIV/0!
		0	0	#DIV/0!	0	0	#DIV/0!		0	0	#DIV/0!				#DIV/0!				#DIV/0!				#DIV/0!				#DIV/0!				#DIV/0!				#DIV/0!
		0	0	#DIV/0!	0	0	#DIV/0!		0	0	#DIV/0!				#DIV/0!				#DIV/0!				#DIV/0!				#DIV/0!				#DIV/0!				#DIV/0!
		0	0	#DIV/0!	0	0	#DIV/0!		0	0	#DIV/0!				#DIV/0!				#DIV/0!				#DIV/0!				#DIV/0!				#DIV/0!				#DIV/0!
		0	0	#DIV/0!	0	0	#DIV/0!		0	0	#DIV/0!				#DIV/0!				#DIV/0!				#DIV/0!				#DIV/0!				#DIV/0!				#DIV/0!
		0	0	#DIV/0!	0	0	#DIV/0!		0	0	#DIV/0!				#DIV/0!				#DIV/0!				#DIV/0!				#DIV/0!				#DIV/0!				#DIV/0!
		0	0	#DIV/0!	0	0	#DIV/0!		0	0	#DIV/0!				#DIV/0!				#DIV/0!				#DIV/0!				#DIV/0!				#DIV/0!				#DIV/0!
		0	0	#DIV/0!	0	0	#DIV/0!		0	0	#DIV/0!				#DIV/0!				#DIV/0!				#DIV/0!				#DIV/0!				#DIV/0!				#DIV/0!
		0	0	#DIV/0!	0	0	#DIV/0!		0	0	#DIV/0!				#DIV/0!				#DIV/0!				#DIV/0!				#DIV/0!				#DIV/0!				#DIV/0!
		0	0	#DIV/0!	0	0	#DIV/0!		0	0	#DIV/0!				#DIV/0!				#DIV/0!				#DIV/0!				#DIV/0!				#DIV/0!				#DIV/0!
		0	0	#DIV/0!	0	0	#DIV/0!		0	0	#DIV/0!				#DIV/0!				#DIV/0!				#DIV/0!				#DIV/0!				#DIV/0!				#DIV/0!
		0	0	#DIV/0!	0	0	#DIV/0!		0	0	#DIV/0!				#DIV/0!				#DIV/0!				#DIV/0!				#DIV/0!				#DIV/0!				#DIV/0!
		0	0	#DIV/0!	0	0	#DIV/0!		0	0	#DIV/0!				#DIV/0!				#DIV/0!				#DIV/0!				#DIV/0!				#DIV/0!				#DIV/0!
		0	0	#DIV/0!	0	0	#DIV/0!		0	0	#DIV/0!				#DIV/0!				#DIV/0!				#DIV/0!				#DIV/0!				#DIV/0!				#DIV/0!
		0	0	#DIV/0!	0	0	#DIV/0!		0	0	#DIV/0!				#DIV/0!				#DIV/0!				#DIV/0!				#DIV/0!				#DIV/0!				#DIV/0!
		0	0	#DIV/0!	0	0	#DIV/0!		0	0	#DIV/0!				#DIV/0!				#DIV/0!				#DIV/0!				#DIV/0!				#DIV/0!				#DIV/0!
		0	0	#DIV/0!	0	0	#DIV/0!		0	0	#DIV/0!				#DIV/0!				#DIV/0!				#DIV/0!				#DIV/0!				#DIV/0!				#DIV/0!
		0	0	#DIV/0!	0	0	#DIV/0!		0	0	#DIV/0!				#DIV/0!				#DIV/0!				#DIV/0!				#DIV/0!				#DIV/0!				#DIV/0!
		0	0	#DIV/0!	0	0	#DIV/0!		0	0	#DIV/0!				#DIV/0!				#DIV/0!				#DIV/0!				#DIV/0!				#DIV/0!				#DIV/0!
		0	0	#DIV/0!	0	0	#DIV/0!		0	0	#DIV/0!				#DIV/0!				#DIV/0!				#DIV/0!				#DIV/0!				#DIV/0!				#DIV/0!
		0	0	#DIV/0!	0	0	#DIV/0!		0	0	#DIV/0!				#DIV/0!				#DIV/0!				#DIV/0!				#DIV/0!				#DIV/0!				#DIV/0!
		0	0	#DIV/0!	0	0	#DIV/0!		0	0	#DIV/0!				#DIV/0!				#DIV/0!				#DIV/0!				#DIV/0!				#DIV/0!				#DIV/0!
		0	0	#DIV/0!	0	0	#DIV/0!		0	0	#DIV/0!				#DIV/0!				#DIV/0!				#DIV/0!				#DIV/0!				#DIV/0!				#DIV/0!
		0	0	#DIV/0!	0	0	#DIV/0!		0	0	#DIV/0!				#DIV/0!				#DIV/0!				#DIV/0!				#DIV/0!				#DIV/0!				#DIV/0!
		0	0	#DIV/0!	0	0	#DIV/0!		0	0	#DIV/0!				#DIV/0!				#DIV/0!				#DIV/0!				#DIV/0!				#DIV/0!				#DIV/0!
		0	0	#DIV/0!	0	0	#DIV/0!		0	0	#DIV/0!				#DIV/0!				#DIV/0!				#DIV/0!				#DIV/0!				#DIV/0!				#DIV/0!
		0	0	#DIV/0!	0	0	#DIV/0!		0	0	#DIV/0!				#DIV/0!				#DIV/0!				#DIV/0!				#DIV/0!				#DIV/0!				#DIV/0!
		0	0	#DIV/0!	0	0	#DIV/0!		0	0	#DIV/0!				#DIV/0!				#DIV/0!				#DIV/0!				#DIV/0!				#DIV/0!				#DIV/0!
		0	0	#DIV/0!	0	0	#DIV/0!		0	0	#DIV/0!				#DIV/0!				#DIV/0!				#DIV/0!				#DIV/0!				#DIV/0!				#DIV/0!
		0	0	#DIV/0!	0	0	#DIV/0!		0	0	#DIV/0!				#DIV/0!				#DIV/0!				#DIV/0!				#DIV/0!				#DIV/0!				#DIV/0!
		0	0	#DIV/0!	0	0	#DIV/0!		0	0	#DIV/0!				#DIV/0!				#DIV/0!				#DIV/0!				#DIV/0!				#DIV/0!				#DIV/0!
		0	0	#DIV/0!	0	0	#DIV/0!		0	0	#DIV/0!				#DIV/0!				#DIV/0!				#DIV/0!				#DIV/0!				#DIV/0!				#DIV/0!
		0	0	#DIV/0!	0	0	#DIV/0!		0	0	#DIV/0!				#DIV/0!				#DIV/0!				#DIV/0!				#DIV/0!				#DIV/0!				#DIV/0!
		0	0	#DIV/0!	0	0	#DIV/0!		0	0	#DIV/0!				#DIV/0!				#DIV/0!				#DIV/0!				#DIV/0!				#DIV/0!				#DIV/0!
		0	0	#DIV/0!	0	0	#DIV/0!		0	0	#DIV/0!				#DIV/0!				#DIV/0!				#DIV/0!				#DIV/0!				#DIV/0!				#DIV/0!
		0	0	#DIV/0!	0	0	#DIV/0!		0	0	#DIV/0!				#DIV/0!				#DIV/0!				#DIV/0!				#DIV/0!				#DIV/0!				#DIV/0!
		0	0	#DIV/0!	0	0	#DIV/0!		0	0	#DIV/0!				#DIV/0!				#DIV/0!				#DIV/0!				#DIV/0!				#DIV/0!				#DIV/0!
		0	0	#DIV/0!	0	0	#DIV/0!		0	0	#DIV/0!				#DIV/0!				#DIV/0!				#DIV/0!				#DIV/0!				#DIV/0!				#DIV/0!
		0	0	#DIV/0!	0	0	#DIV/0!		0	0	#DIV/0!				#DIV/0!				#DIV/0!				#DIV/0!				#DIV/0!				#DIV/0!				#DIV/0!
		0	0	#DIV/0!	0	0	#DIV/0!		0	0	#DIV/0!				#DIV/0!				#DIV/0!				#DIV/0!				#DIV/0!				#DIV/0!				#DIV/0!
		0	0	#DIV/0!	0	0	#DIV/0!		0	0	#DIV/0!				#DIV/0!				#DIV/0!				#DIV/0!				#DIV/0!				#DIV/0!				#DIV/0!
		0	0	#DIV/0!	0	0	#DIV/0!		0	0	#DIV/0!				#DIV/0!				#DIV/0!				#DIV/0!				#DIV/0!				#DIV/0!				#DIV/0!
		0	0	#DIV/0!	0	0	#DIV/0!		0	0	#DIV/0!				#DIV/0!				#DIV/0!				#DIV/0!				#DIV/0!				#DIV/0!				#DIV/0!
		0	0	#DIV/0!	0	0	#DIV/0!		0	0	#DIV/0!				#DIV/0!				#DIV/0!				#DIV/0!				#DIV/0!				#DIV/0!				#DIV/0!
		0	0	#DIV/0!	0	0	#DIV/0!		0	0	#DIV/0!				#DIV/0!				#DIV/0!				#DIV/0!				#DIV/0!				#DIV/0!				#DIV/0!
		0	0	#DIV/0!	0	0	#DIV/0!		0	0	#DIV/0!				#DIV/0!				#DIV/0!				#DIV/0!				#DIV/0!				#DIV/0!				#DIV/0!
		0	0	#DIV/0!	0	0	#DIV/0!		0	0	#DIV/0!				#DIV/0!				#DIV/0!				#DIV/0!				#DIV/0!				#DIV/0!				#DIV/0!
		0	0	#DIV/0!	0	0	#DIV/0!		0	0	#DIV/0!				#DIV/0!				#DIV/0!				#DIV/0!				#DIV/0!				#DIV/0!				#DIV/0!
		0	0	#DIV/0!	0	0	#DIV/0!		0	0	#DIV/0!				#DIV/0!				#DIV/0!				#DIV/0!				#DIV/0!				#DIV/0!				#DIV/0!
		0	0	#DIV/0!	0	0	#DIV/0!		0	0	#DIV/0!				#DIV/0!				#DIV/0!				#DIV/0!				#DIV/0!				#DIV/0!				#DIV/0!
		0	0	#DIV/0!	0	0	#DIV/0!		0	0	#DIV/0!				#DIV/0!				#DIV/0!				#DIV/0!				#DIV/0!				#DIV/0!				#DIV/0!
		0	0	#DIV/0!	0	0	#DIV/0!		0	0	#DIV/0!				#DIV/0!				#DIV/0!				#DIV/0!				#DIV/0!				#DIV/0!				#DIV/0!
		0	0	#DIV/0!	0	0	#DIV/0!		0	0	#DIV/0!				#DIV/0!				#DIV/0!				#DIV/0!				#DIV/0!				#DIV/0!				#DIV/0!
		0	0	#DIV/0!	0	0	#DIV/0!		0	0	#DIV/0!				#DIV/0!				#DIV/0!				#DIV/0!				#DIV/0!				#DIV/0!				#DIV/0!
		0	0	#DIV/0!	0	0	#DIV/0!		0	0	#DIV/0!				#DIV/0!				#DIV/0!				#DIV/0!				#DIV/0!				#DIV/0!				#DIV/0!
		0	0	#DIV/0!	0	0	#DIV/0!		0	0	#DIV/0!				#DIV/0!				#DIV/0!				#DIV/0!				#DIV/0!				#DIV/0!				#DIV/0!
		0	0	#DIV/0!	0	0	#DIV/0!		0	0	#DIV/0!				#DIV/0!				#DIV/0!				#DIV/0!				#DIV/0!				#DIV/0!				#DIV/0!
		0	0	#DIV/0!	0	0	#DIV/0!		0	0	#DIV/0!				#DIV/0!				#DIV/0!				#DIV/0!				#DIV/0!				#DIV/0!				#DIV/0!
		0	0	#DIV/0!	0	0	#DIV/0!		0	0	#DIV/0!				#DIV/0!				#DIV/0!				#DIV/0!				#DIV/0!				#DIV/0!				#DIV/0!
		0	0	#DIV/0!	0	0	#DIV/0!		0	0	#DIV/0!				#DIV/0!				#DIV/0!				#DIV/0!				#DIV/0!				#DIV/0!				#DIV/0!
		0	0	#DIV/0!	0	0	#DIV/0!		0	0	#DIV/0!				#DIV/0!				#DIV/0!				#DIV/0!				#DIV/0!				#DIV/0!				#DIV/0!
		0	0	#DIV/0!	0	0	#DIV/0!		0	0	#DIV/0!				#DIV/0!				#DIV/0!				#DIV/0!				#DIV/0!				#DIV/0!				#DIV/0!
		0	0	#DIV/0!	0	0	#DIV/0!		0	0	#DIV/0!				#DIV/0!				#DIV/0!				#DIV/0!				#DIV/0!				#DIV/0!				#DIV/0!
		0	0	#DIV/0!	0	0	#DIV/0!		0	0	#DIV/0!				#DIV/0!				#DIV/0!				#DIV/0!				#DIV/0!				#DIV/0!				#DIV/0!
		0	0	#DIV/0!	0	0	#DIV/0!		0	0	#DIV/0!				#DIV/0!				#DIV/0!				#DIV/0!				#DIV/0!				#DIV/0!				#DIV/0!
		0	0	#DIV/0!	0	0	#DIV/0!		0	0	#DIV/0!				#DIV/0!				#DIV/0!				#DIV/0!				#DIV/0!				#DIV/0!				#DIV/0!
		0	0	#DIV/0!	0	0	#DIV/0!		0	0	#DIV/0!				#DIV/0!				#DIV/0!				#DIV/0!				#DIV/0!				#DIV/0!				#DIV/0!
		0	0	#DIV/0!	0	0	#DIV/0!		0	0	#DIV/0!				#DIV/0!				#DIV/0!				#DIV/0!				#DIV/0!				#DIV/0!				#DIV/0!
		0	0	#DIV/0!	0	0	#DIV/0!		0	0	#DIV/0!				#DIV/0!				#DIV/0!				#DIV/0!				#DIV/0!				#DIV/0!				#DIV/0!
		0	0	#DIV/0!	0	0	#DIV/0!		0	0	#DIV/0!				#DIV/0!				#DIV/0!				#DIV/0!				#DIV/0!				#DIV/0!				#DIV/0!
		0	0	#DIV/0!	0	0	#DIV/0!		0	0	#DIV/0!				#DIV/0!				#DIV/0!				#DIV/0!				#DIV/0!				#DIV/0!				#DIV/0!
		0	0	#DIV/0!	0	0	#DIV/0!		0	0	#DIV/0!				#DIV/0!				#DIV/0!				#DIV/0!				#DIV/0!				#DIV/0!				#DIV/0!
		0	0	#DIV/0!	0	0	#DIV/0!		0	0	#DIV/0!				#DIV/0!				#DIV/0!				#DIV/0!				#DIV/0!				#DIV/0!				#DIV/0!
		0	0	#DIV/0!	0	0	#DIV/0!		0	0	#DIV/0!				#DIV/0!				#DIV/0!				#DIV/0!				#DIV/0!				#DIV/0!				#DIV/0!
		0	0	#DIV/0!	0	0	#DIV/0!		0	0	#DIV/0!				#DIV/0!				#DIV/0!				#DIV/0!				#DIV/0!				#DIV/0!				#DIV/0!
		0	0	#DIV/0!	0	0	#DIV/0!		0	0	#DIV/0!				#DIV/0!				#DIV/0!				#DIV/0!				#DIV/0!				#DIV/0!				#DIV/0!
		0	0	#DIV/0!	0	0	#DIV/0!		0	0	#DIV/0!				#DIV/0!				#DIV/0!				#DIV/0!				#DIV/0!				#DIV/0!				#DIV/0!
		0	0	#DIV/0!	0	0	#DIV/0!		0	0	#DIV/0!				#DIV/0!				#DIV/0!				#DIV/0!				#DIV/0!				#DIV/0!				#DIV/0!
		0	0	#DIV/0!	0	0	#DIV/0!		0	0	#DIV/0!				#DIV/0!				#DIV/0!				#DIV/0!				#DIV/0!				#DIV/0!				#DIV/0!
		0	0	#DIV/0!	0	0	#DIV/0!		0	0	#DIV/0!				#DIV/0!				#DIV/0!				#DIV/0!				#DIV/0!				#DIV/0!				#DIV/0!
		0	0	#DIV/0!	0	0	#DIV/0!		0	0	#DIV/0!				#DIV/0!				#DIV/0!				#DIV/0!				#DIV/0!				#DIV/0!				#DIV/0!
		0	0	#DIV/0!	0	0	#DIV/0!		0	0	#DIV/0!				#DIV/0!				#DIV/0!				#DIV/0!				#DIV/0!				#DIV/0!				#DIV/0!
		0	0	#DIV/0!	0	0	#DIV/0!		0	0	#DIV/0!				#DIV/0!				#DIV/0!				#DIV/0!				#DIV/0!				#DIV/0!				#DIV/0!
		0	0	#DIV/0!	0	0	#DIV/0!		0	0	#DIV/0!				#DIV/0!				#DIV/0!				#DIV/0!				#DIV/0!				#DIV/0!				#DIV/0!
		0	0	#DIV/0!	0	0	#DIV/0!		0	0	#DIV/0!				#DIV/0!				#DIV/0!				#DIV/0!				#DIV/0!				#DIV/0!				#DIV/0!
		0	0	#DIV/0!	0	0	#DIV/0!		0	0	#DIV/0!				#DIV/0!				#DIV/0!				#DIV/0!				#DIV/0!				#DIV/0!				#DIV/0!
		0	0	#DIV/0!	0	0	#DIV/0!		0	0	#DIV/0!				#DIV/0!				#DIV/0!				#DIV/0!				#DIV/0!				#DIV/0!				#DIV/0!
		0	0	#DIV/0!	0	0	#DIV/0!		0	0	#DIV/0!				#DIV/0!				#DIV/0!				#DIV/0!				#DIV/0!				#DIV/0!				#DIV/0!
		0	0	#DIV/0!	0	0	#DIV/0!		0	0	#DIV/0!				#DIV/0!				#DIV/0!				#DIV/0!				#DIV/0!				#DIV/0!				#DIV/0!
		0	0	#DIV/0!	0	0	#DIV/0!		0	0	#DIV/0!				#DIV/0!				#DIV/0!				#DIV/0!				#DIV/0!				#DIV/0!				#DIV/0!
		0	0	#DIV/0!	0	0	#DIV/0!		0	0	#DIV/0!				#DIV/0!				#DIV/0!				#DIV/0!				#DIV/0!				#DIV/0!				#DIV/0!
		0	0	#DIV/0!	0	0	#DIV/0!		0	0	#DIV/0!				#DIV/0!				#DIV/0!				#DIV/0!				#DIV/0!				#DIV/0!				#DIV/0!
		0	0	#DIV/0!	0	0	#DIV/0!		0	0	#DIV/0!				#DIV/0!				#DIV/0!				#DIV/0!				#DIV/0!				#DIV/0!				#DIV/0!
		0	0	#DIV/0!	0	0	#DIV/0!		0	0	#DIV/0!				#DIV/0!				#DIV/0!				#DIV/0!				#DIV/0!				#DIV/0!				#DIV/0!
		0	0	#DIV/0!	0	0	#DIV/0!		0	0	#DIV/0!				#DIV/0!				#DIV/0!				#DIV/0!				#DIV/0!				#DIV/0!				#DIV/0!
		0	0	#DIV/0!	0	0	#DIV/0!		0	0	#DIV/0!				#DIV/0!				#DIV/0!				#DIV/0!				#DIV/0!				#DIV/0!				#DIV/0!
[truncated: 115 more columns]

## Sheet: 6-female rep
Tumours of the female reproductive organs
TABLE 3 - Prevalence of TERT promoter mutations		Prev(n)	Total(n)	Total(%)	p1	t1	%	ref1	p2	t2	%	ref2	p3	t3	%	ref3	p4	t4	%	ref4					p6	t6	%	ref6	p7	t7	%	ref7	p8	t8	%	ref8	p9	t9	%	ref9	p10	t10	%	ref10	p11	t11	%	ref11	p12
Tumours of the ovary	Ovarian low-grade serous carcinoma	2	41	0.0487805	1	8	0.125	Killela2013	1	33	0.030303	Wu2014																			#DIV/0!				#DIV/0!				#DIV/0!				#DIV/0!				#DIV/0!
Tumours of the ovary	Ovarian clear cell carcinoma	48	301	0.159468	2	12	0.166667	Killela2013	9	56	0.160714	Huang2015	37	233	0.158798	Wu2014															#DIV/0!				#DIV/0!				#DIV/0!				#DIV/0!				#DIV/0!
Tumours of the uterine corpus	Uterine endometrial carcinoma, NOS	2	19	0.105263	2	19	0.105263	Killela2013																							#DIV/0!				#DIV/0!				#DIV/0!				#DIV/0!				#DIV/0!
Tumours of the uterine corpus	Uterine clear cell carcinoma, NOS	3	14	0.214286	3	14	0.214286	Huang2015																							#DIV/0!				#DIV/0!				#DIV/0!				#DIV/0!				#DIV/0!
Tumours of the uterine cervix	Cervical squamous cell carcinoma	33	225	0.146667	1	22	0.0454545	Killela2013	2	53	0.0377358	Wu2014	0	10	0	Cheng2014	30	140	0.214286	Vinothkumar2015											#DIV/0!				#DIV/0!				#DIV/0!				#DIV/0!				#DIV/0!
Tumours of the vulva	Vulvar melanoma	2	23	0.0869565	2	23	0.0869565	Dias-Santagata2017																							#DIV/0!				#DIV/0!				#DIV/0!				#DIV/0!				#DIV/0!
Tumours of the ovary	High-grade ovarian serous carcinoma	0	80	0	0	80	0	Wu2014																							#DIV/0!				#DIV/0!				#DIV/0!				#DIV/0!				#DIV/0!
Tumours of the ovary	Ovarian endometrioid carcinoma	0	43	0	0	43	0	Wu2014																							#DIV/0!				#DIV/0!				#DIV/0!				#DIV/0!				#DIV/0!
Tumours of the uterine corpus	Uterine endometrioid carcinoma	0	24	0	0	24	0	Wu2014																							#DIV/0!				#DIV/0!				#DIV/0!				#DIV/0!				#DIV/0!
Tumours of the uterine corpus	Uterine leiomyosarcoma	0	22	0	0	22	0	Wu2014																							#DIV/0!				#DIV/0!				#DIV/0!				#DIV/0!				#DIV/0!
Tumours of the uterine corpus	Uterine serous carcinoma	0	12	0	0	12	0	Wu2014																							#DIV/0!				#DIV/0!				#DIV/0!				#DIV/0!				#DIV/0!
Tumours of the uterine cervix	Cervical adenocarcinoma, NOS	0	25	0	0	25	0	Wu2014																							#DIV/0!				#DIV/0!				#DIV/0!				#DIV/0!				#DIV/0!
			829
TABLE 4A - Prevalence of TERT amplifications		Prev(n)	Total(n)	Total(%)	p1	t1	%	ref1	p2	t2	%	ref2	p3	t3	%	ref3	p4	t4	%	ref4											#DIV/0!				#DIV/0!				#DIV/0!				#DIV/0!				#DIV/0!
Tumours of the ovary	Ovarian serous cystadenocarcinoma	6	27	0.222222	6	27	0.222222	Barthel2017																							#DIV/0!				#DIV/0!				#DIV/0!				#DIV/0!				#DIV/0!
Tumours of the uterine cervix	Cervical intraepithelial neoplasia (CIN) 2	6	10	0.6	6	10	0.6	Visnovsky2014																							#DIV/0!				#DIV/0!				#DIV/0!				#DIV/0!				#DIV/0!
Tumours of the uterine cervix	Cervical intraepithelial neoplasia (CIN) 3	7	8	0.875	7	8	0.875	Visnovsky2014																							#DIV/0!				#DIV/0!				#DIV/0!				#DIV/0!				#DIV/0!
Tumours of the uterine cervix	Cervical carcinoma, NOS	7	14	0.5	3	10	0.3	Zhang2000	4	4	1	Visnovsky2014																			#DIV/0!				#DIV/0!				#DIV/0!				#DIV/0!				#DIV/0!
Tumours of the uterine cervix	Cervical intraepithelial neoplasia (CIN) 1	0	5	0	0	5	0	Visnovsky2014																							#DIV/0!				#DIV/0!				#DIV/0!				#DIV/0!				#DIV/0!
			64
TABLE 4B - Prevalence of TERC amplifications		Prev(n)	Total(n)	Total(%)	p1	t1	%	ref1	p2	t2	%	ref2	p3	t3	%	ref3	p4	t4	%	ref4	p5	t5	%	ref5							#DIV/0!				#DIV/0!				#DIV/0!				#DIV/0!				#DIV/0!
Tumours of the ovary	Ovarian carcinoma	13	35	0.371429	7	8	0.875	Sugita2000	6	27	0.222222	Barthel2017																			#DIV/0!				#DIV/0!				#DIV/0!				#DIV/0!				#DIV/0!
Tumours of the uterine cervix	Cervical intraepithelial neoplasia (CIN) 1	10	41	0.243902	4	17	0.235294	Andersson2009	4	19	0.210526	Liu2012	2	5	0.4	Visnovsky2014															#DIV/0!				#DIV/0!				#DIV/0!				#DIV/0!				#DIV/0!
Tumours of the uterine cervix	Cervical intraepithelial neoplasia (CIN) 2	29	44	0.659091	14	22	0.636364	Andersson2009	6	12	0.5	Liu2012	9	10	0.9	Visnovsky2014															#DIV/0!				#DIV/0!				#DIV/0!				#DIV/0!				#DIV/0!
Tumours of the uterine cervix	Cervical intraepithelial neoplasia (CIN) 3	51	58	0.87931	21	23	0.913043	Andersson2009	22	27	0.814815	Liu2012	8	8	1	Visnovsky2014															#DIV/0!				#DIV/0!				#DIV/0!				#DIV/0!				#DIV/0!
Tumours of the uterine cervix	Cervical carcinoma, NOS	53	90	0.588889	2	33	0.0606061	Soder1997	14	20	0.7	Yang2001	12	12	1	Andersson2006	2	2	1	Andersson2009	19	19	1	Liu2012	4	4	1	Visnovsky2014			#DIV/0!				#DIV/0!				#DIV/0!				#DIV/0!				#DIV/0!
			268
TABLE 6 - Prevalence of ALT		Prev(n)	Total(n)	Total(%)	p1	t1	%	ref1																							#DIV/0!				#DIV/0!				#DIV/0!				#DIV/0!				#DIV/0!
Tumours of the peritoneum	Diffuse malignant peritoneu mesothelioma	10	38	0.263158	10	38	0.263158	Villa2008																							#DIV/0!				#DIV/0!				#DIV/0!				#DIV/0!				#DIV/0!
Tumours of the uterine corpus	Uterine carcinosarcoma	8	16	0.5	8	16	0.5	Lee2011																							#DIV/0!				#DIV/0!				#DIV/0!				#DIV/0!				#DIV/0!
Tumours of the uterine corpus	Uterine leiomyosarcoma	7	8	0.875	7	8	0.875	Lee2011																							#DIV/0!				#DIV/0!				#DIV/0!				#DIV/0!				#DIV/0!
Tumours of the uterine corpus	Uterin serous carcinoma	3	41	0.0731707	3	41	0.0731707	Heaphy2011																							#DIV/0!				#DIV/0!				#DIV/0!				#DIV/0!				#DIV/0!
Tumours of the uterine corpus	Uterine stromal sarcoma	4	17	0.235294	4	17	0.235294	Lee2011																							#DIV/0!				#DIV/0!				#DIV/0!				#DIV/0!				#DIV/0!
Tumours of the ovary	Ovarian serous carcinoma, NOS	0	205	0	0	205	0	Heaphy2011																							#DIV/0!				#DIV/0!				#DIV/0!				#DIV/0!				#DIV/0!
Tumours of the ovary	Ovarian mucinous carcinoma	0	21	0	0	21	0	Heaphy2011																							#DIV/0!				#DIV/0!				#DIV/0!				#DIV/0!				#DIV/0!
Tumours of the ovary	Ovarian endometrioid carcinoma	0	72	0	0	72	0	Heaphy2011																							#DIV/0!				#DIV/0!				#DIV/0!				#DIV/0!				#DIV/0!
Tumours of the ovary	Ovarian clear cell carcinoma	0	56	0	0	56	0	Heaphy2011																							#DIV/0!				#DIV/0!				#DIV/0!				#DIV/0!				#DIV/0!
Tumours of the uterine corpus	Uterine endometrioid carcinoma	0	64	0	0	64	0	Heaphy2011																							#DIV/0!				#DIV/0!				#DIV/0!				#DIV/0!				#DIV/0!
Tumours of the uterine corpus	Uterine clear cell carcinoma	0	3	0	0	3	0	Heaphy2011																							#DIV/0!				#DIV/0!				#DIV/0!				#DIV/0!				#DIV/0!
Tumours of the uterine corpus	Uterine mixed mesodermal tumour	0	4	0	0	4	0	Heaphy2011																							#DIV/0!				#DIV/0!				#DIV/0!				#DIV/0!				#DIV/0!
Tumours of the uterine cervix	Cervical squamous cell carcinoma	0	152	0	0	152	0	Heaphy2011																							#DIV/0!				#DIV/0!				#DIV/0!				#DIV/0!				#DIV/0!
Tumours of the uterine cervix	Cervical adenocarcinoma, NOS	0	19	0	0	19	0	Heaphy2011																							#DIV/0!				#DIV/0!				#DIV/0!				#DIV/0!				#DIV/0!
			716
NOS non otherwise specified
		0	0	#DIV/0!	0	0	#DIV/0!		0	0	#DIV/0!				#DIV/0!				#DIV/0!				#DIV/0!				#DIV/0!				#DIV/0!				#DIV/0!				#DIV/0!				#DIV/0!				#DIV/0!
		0	0	#DIV/0!	0	0	#DIV/0!		0	0	#DIV/0!				#DIV/0!				#DIV/0!				#DIV/0!				#DIV/0!				#DIV/0!				#DIV/0!				#DIV/0!				#DIV/0!				#DIV/0!
		0	0	#DIV/0!	0	0	#DIV/0!		0	0	#DIV/0!				#DIV/0!				#DIV/0!				#DIV/0!				#DIV/0!				#DIV/0!				#DIV/0!				#DIV/0!				#DIV/0!				#DIV/0!
		0	0	#DIV/0!	0	0	#DIV/0!		0	0	#DIV/0!				#DIV/0!				#DIV/0!				#DIV/0!				#DIV/0!				#DIV/0!				#DIV/0!				#DIV/0!				#DIV/0!				#DIV/0!
		0	0	#DIV/0!	0	0	#DIV/0!		0	0	#DIV/0!				#DIV/0!				#DIV/0!				#DIV/0!				#DIV/0!				#DIV/0!				#DIV/0!				#DIV/0!				#DIV/0!				#DIV/0!
		0	0	#DIV/0!	0	0	#DIV/0!		0	0	#DIV/0!				#DIV/0!				#DIV/0!				#DIV/0!				#DIV/0!				#DIV/0!				#DIV/0!				#DIV/0!				#DIV/0!				#DIV/0!
		0	0	#DIV/0!	0	0	#DIV/0!		0	0	#DIV/0!				#DIV/0!				#DIV/0!				#DIV/0!				#DIV/0!				#DIV/0!				#DIV/0!				#DIV/0!				#DIV/0!				#DIV/0!
		0	0	#DIV/0!	0	0	#DIV/0!		0	0	#DIV/0!				#DIV/0!				#DIV/0!				#DIV/0!				#DIV/0!				#DIV/0!				#DIV/0!				#DIV/0!				#DIV/0!				#DIV/0!
		0	0	#DIV/0!	0	0	#DIV/0!		0	0	#DIV/0!				#DIV/0!				#DIV/0!				#DIV/0!				#DIV/0!				#DIV/0!				#DIV/0!				#DIV/0!				#DIV/0!				#DIV/0!
		0	0	#DIV/0!	0	0	#DIV/0!		0	0	#DIV/0!				#DIV/0!				#DIV/0!				#DIV/0!				#DIV/0!				#DIV/0!				#DIV/0!				#DIV/0!				#DIV/0!				#DIV/0!
		0	0	#DIV/0!	0	0	#DIV/0!		0	0	#DIV/0!				#DIV/0!				#DIV/0!				#DIV/0!				#DIV/0!				#DIV/0!				#DIV/0!				#DIV/0!				#DIV/0!				#DIV/0!
		0	0	#DIV/0!	0	0	#DIV/0!		0	0	#DIV/0!				#DIV/0!				#DIV/0!				#DIV/0!				#DIV/0!				#DIV/0!				#DIV/0!				#DIV/0!				#DIV/0!				#DIV/0!
		0	0	#DIV/0!	0	0	#DIV/0!		0	0	#DIV/0!				#DIV/0!				#DIV/0!				#DIV/0!				#DIV/0!				#DIV/0!				#DIV/0!				#DIV/0!				#DIV/0!				#DIV/0!
		0	0	#DIV/0!	0	0	#DIV/0!		0	0	#DIV/0!				#DIV/0!				#DIV/0!				#DIV/0!				#DIV/0!				#DIV/0!				#DIV/0!				#DIV/0!				#DIV/0!				#DIV/0!
		0	0	#DIV/0!	0	0	#DIV/0!		0	0	#DIV/0!				#DIV/0!				#DIV/0!				#DIV/0!				#DIV/0!				#DIV/0!				#DIV/0!				#DIV/0!				#DIV/0!				#DIV/0!
		0	0	#DIV/0!	0	0	#DIV/0!		0	0	#DIV/0!				#DIV/0!				#DIV/0!				#DIV/0!				#DIV/0!				#DIV/0!				#DIV/0!				#DIV/0!				#DIV/0!				#DIV/0!
		0	0	#DIV/0!	0	0	#DIV/0!		0	0	#DIV/0!				#DIV/0!				#DIV/0!				#DIV/0!				#DIV/0!				#DIV/0!				#DIV/0!				#DIV/0!				#DIV/0!				#DIV/0!
		0	0	#DIV/0!	0	0	#DIV/0!		0	0	#DIV/0!				#DIV/0!				#DIV/0!				#DIV/0!				#DIV/0!				#DIV/0!				#DIV/0!				#DIV/0!				#DIV/0!				#DIV/0!
		0	0	#DIV/0!	0	0	#DIV/0!		0	0	#DIV/0!				#DIV/0!				#DIV/0!				#DIV/0!				#DIV/0!				#DIV/0!				#DIV/0!				#DIV/0!				#DIV/0!				#DIV/0!
		0	0	#DIV/0!	0	0	#DIV/0!		0	0	#DIV/0!				#DIV/0!				#DIV/0!				#DIV/0!				#DIV/0!				#DIV/0!				#DIV/0!				#DIV/0!				#DIV/0!				#DIV/0!
		0	0	#DIV/0!	0	0	#DIV/0!		0	0	#DIV/0!				#DIV/0!				#DIV/0!				#DIV/0!				#DIV/0!				#DIV/0!				#DIV/0!				#DIV/0!				#DIV/0!				#DIV/0!
		0	0	#DIV/0!	0	0	#DIV/0!		0	0	#DIV/0!				#DIV/0!				#DIV/0!				#DIV/0!				#DIV/0!				#DIV/0!				#DIV/0!				#DIV/0!				#DIV/0!				#DIV/0!
		0	0	#DIV/0!	0	0	#DIV/0!		0	0	#DIV/0!				#DIV/0!				#DIV/0!				#DIV/0!				#DIV/0!				#DIV/0!				#DIV/0!				#DIV/0!				#DIV/0!				#DIV/0!
		0	0	#DIV/0!	0	0	#DIV/0!		0	0	#DIV/0!				#DIV/0!				#DIV/0!				#DIV/0!				#DIV/0!				#DIV/0!				#DIV/0!				#DIV/0!				#DIV/0!				#DIV/0!
		0	0	#DIV/0!	0	0	#DIV/0!		0	0	#DIV/0!				#DIV/0!				#DIV/0!				#DIV/0!				#DIV/0!				#DIV/0!				#DIV/0!				#DIV/0!				#DIV/0!				#DIV/0!
		0	0	#DIV/0!	0	0	#DIV/0!		0	0	#DIV/0!				#DIV/0!				#DIV/0!				#DIV/0!				#DIV/0!				#DIV/0!				#DIV/0!				#DIV/0!				#DIV/0!				#DIV/0!
		0	0	#DIV/0!	0	0	#DIV/0!		0	0	#DIV/0!				#DIV/0!				#DIV/0!				#DIV/0!				#DIV/0!				#DIV/0!				#DIV/0!				#DIV/0!				#DIV/0!				#DIV/0!
		0	0	#DIV/0!	0	0	#DIV/0!		0	0	#DIV/0!				#DIV/0!				#DIV/0!				#DIV/0!				#DIV/0!				#DIV/0!				#DIV/0!				#DIV/0!				#DIV/0!				#DIV/0!
		0	0	#DIV/0!	0	0	#DIV/0!		0	0	#DIV/0!				#DIV/0!				#DIV/0!				#DIV/0!				#DIV/0!				#DIV/0!				#DIV/0!				#DIV/0!				#DIV/0!				#DIV/0!
		0	0	#DIV/0!	0	0	#DIV/0!		0	0	#DIV/0!				#DIV/0!				#DIV/0!				#DIV/0!				#DIV/0!				#DIV/0!				#DIV/0!				#DIV/0!				#DIV/0!				#DIV/0!
		0	0	#DIV/0!	0	0	#DIV/0!		0	0	#DIV/0!				#DIV/0!				#DIV/0!				#DIV/0!				#DIV/0!				#DIV/0!				#DIV/0!				#DIV/0!				#DIV/0!				#DIV/0!
		0	0	#DIV/0!	0	0	#DIV/0!		0	0	#DIV/0!				#DIV/0!				#DIV/0!				#DIV/0!				#DIV/0!				#DIV/0!				#DIV/0!				#DIV/0!				#DIV/0!				#DIV/0!
		0	0	#DIV/0!	0	0	#DIV/0!		0	0	#DIV/0!				#DIV/0!				#DIV/0!				#DIV/0!				#DIV/0!				#DIV/0!				#DIV/0!				#DIV/0!				#DIV/0!				#DIV/0!
		0	0	#DIV/0!	0	0	#DIV/0!		0	0	#DIV/0!				#DIV/0!				#DIV/0!				#DIV/0!				#DIV/0!				#DIV/0!				#DIV/0!				#DIV/0!				#DIV/0!				#DIV/0!
		0	0	#DIV/0!	0	0	#DIV/0!		0	0	#DIV/0!				#DIV/0!				#DIV/0!				#DIV/0!				#DIV/0!				#DIV/0!				#DIV/0!				#DIV/0!				#DIV/0!				#DIV/0!
		0	0	#DIV/0!	0	0	#DIV/0!		0	0	#DIV/0!				#DIV/0!				#DIV/0!				#DIV/0!				#DIV/0!				#DIV/0!				#DIV/0!				#DIV/0!				#DIV/0!				#DIV/0!
		0	0	#DIV/0!	0	0	#DIV/0!		0	0	#DIV/0!				#DIV/0!				#DIV/0!				#DIV/0!				#DIV/0!				#DIV/0!				#DIV/0!				#DIV/0!				#DIV/0!				#DIV/0!
		0	0	#DIV/0!	0	0	#DIV/0!		0	0	#DIV/0!				#DIV/0!				#DIV/0!				#DIV/0!				#DIV/0!				#DIV/0!				#DIV/0!				#DIV/0!				#DIV/0!				#DIV/0!
		0	0	#DIV/0!	0	0	#DIV/0!		0	0	#DIV/0!				#DIV/0!				#DIV/0!				#DIV/0!				#DIV/0!				#DIV/0!				#DIV/0!				#DIV/0!				#DIV/0!				#DIV/0!
		0	0	#DIV/0!	0	0	#DIV/0!		0	0	#DIV/0!				#DIV/0!				#DIV/0!				#DIV/0!				#DIV/0!				#DIV/0!				#DIV/0!				#DIV/0!				#DIV/0!				#DIV/0!
		0	0	#DIV/0!	0	0	#DIV/0!		0	0	#DIV/0!				#DIV/0!				#DIV/0!				#DIV/0!				#DIV/0!				#DIV/0!				#DIV/0!				#DIV/0!				#DIV/0!				#DIV/0!
		0	0	#DIV/0!	0	0	#DIV/0!		0	0	#DIV/0!				#DIV/0!				#DIV/0!				#DIV/0!				#DIV/0!				#DIV/0!				#DIV/0!				#DIV/0!				#DIV/0!				#DIV/0!
		0	0	#DIV/0!	0	0	#DIV/0!		0	0	#DIV/0!				#DIV/0!				#DIV/0!				#DIV/0!				#DIV/0!				#DIV/0!				#DIV/0!				#DIV/0!				#DIV/0!				#DIV/0!
		0	0	#DIV/0!	0	0	#DIV/0!		0	0	#DIV/0!				#DIV/0!				#DIV/0!				#DIV/0!				#DIV/0!				#DIV/0!				#DIV/0!				#DIV/0!				#DIV/0!				#DIV/0!
		0	0	#DIV/0!	0	0	#DIV/0!		0	0	#DIV/0!				#DIV/0!				#DIV/0!				#DIV/0!				#DIV/0!				#DIV/0!				#DIV/0!				#DIV/0!				#DIV/0!				#DIV/0!
		0	0	#DIV/0!	0	0	#DIV/0!		0	0	#DIV/0!				#DIV/0!				#DIV/0!				#DIV/0!				#DIV/0!				#DIV/0!				#DIV/0!				#DIV/0!				#DIV/0!				#DIV/0!
		0	0	#DIV/0!	0	0	#DIV/0!		0	0	#DIV/0!				#DIV/0!				#DIV/0!				#DIV/0!				#DIV/0!				#DIV/0!				#DIV/0!				#DIV/0!				#DIV/0!				#DIV/0!
		0	0	#DIV/0!	0	0	#DIV/0!		0	0	#DIV/0!				#DIV/0!				#DIV/0!				#DIV/0!				#DIV/0!				#DIV/0!				#DIV/0!				#DIV/0!				#DIV/0!				#DIV/0!
		0	0	#DIV/0!	0	0	#DIV/0!		0	0	#DIV/0!				#DIV/0!				#DIV/0!				#DIV/0!				#DIV/0!				#DIV/0!				#DIV/0!				#DIV/0!				#DIV/0!				#DIV/0!
		0	0	#DIV/0!	0	0	#DIV/0!		0	0	#DIV/0!				#DIV/0!				#DIV/0!				#DIV/0!				#DIV/0!				#DIV/0!				#DIV/0!				#DIV/0!				#DIV/0!				#DIV/0!
		0	0	#DIV/0!	0	0	#DIV/0!		0	0	#DIV/0!				#DIV/0!				#DIV/0!				#DIV/0!				#DIV/0!				#DIV/0!				#DIV/0!				#DIV/0!				#DIV/0!				#DIV/0!
		0	0	#DIV/0!	0	0	#DIV/0!		0	0	#DIV/0!				#DIV/0!				#DIV/0!				#DIV/0!				#DIV/0!				#DIV/0!				#DIV/0!				#DIV/0!				#DIV/0!				#DIV/0!
		0	0	#DIV/0!	0	0	#DIV/0!		0	0	#DIV/0!				#DIV/0!				#DIV/0!				#DIV/0!				#DIV/0!				#DIV/0!				#DIV/0!				#DIV/0!				#DIV/0!				#DIV/0!
		0	0	#DIV/0!	0	0	#DIV/0!		0	0	#DIV/0!				#DIV/0!				#DIV/0!				#DIV/0!				#DIV/0!				#DIV/0!				#DIV/0!				#DIV/0!				#DIV/0!				#DIV/0!
		0	0	#DIV/0!	0	0	#DIV/0!		0	0	#DIV/0!				#DIV/0!				#DIV/0!				#DIV/0!				#DIV/0!				#DIV/0!				#DIV/0!				#DIV/0!				#DIV/0!				#DIV/0!
		0	0	#DIV/0!	0	0	#DIV/0!		0	0	#DIV/0!				#DIV/0!				#DIV/0!				#DIV/0!				#DIV/0!				#DIV/0!				#DIV/0!				#DIV/0!				#DIV/0!				#DIV/0!
		0	0	#DIV/0!	0	0	#DIV/0!		0	0	#DIV/0!				#DIV/0!				#DIV/0!				#DIV/0!				#DIV/0!				#DIV/0!				#DIV/0!				#DIV/0!				#DIV/0!				#DIV/0!
		0	0	#DIV/0!	0	0	#DIV/0!		0	0	#DIV/0!				#DIV/0!				#DIV/0!				#DIV/0!				#DIV/0!				#DIV/0!				#DIV/0!				#DIV/0!				#DIV/0!				#DIV/0!
		0	0	#DIV/0!	0	0	#DIV/0!		0	0	#DIV/0!				#DIV/0!				#DIV/0!				#DIV/0!				#DIV/0!				#DIV/0!				#DIV/0!				#DIV/0!				#DIV/0!				#DIV/0!
		0	0	#DIV/0!	0	0	#DIV/0!		0	0	#DIV/0!				#DIV/0!				#DIV/0!				#DIV/0!				#DIV/0!				#DIV/0!				#DIV/0!				#DIV/0!				#DIV/0!				#DIV/0!
		0	0	#DIV/0!	0	0	#DIV/0!		0	0	#DIV/0!				#DIV/0!				#DIV/0!				#DIV/0!				#DIV/0!				#DIV/0!				#DIV/0!				#DIV/0!				#DIV/0!				#DIV/0!
		0	0	#DIV/0!	0	0	#DIV/0!		0	0	#DIV/0!				#DIV/0!				#DIV/0!				#DIV/0!				#DIV/0!				#DIV/0!				#DIV/0!				#DIV/0!				#DIV/0!				#DIV/0!
		0	0	#DIV/0!	0	0	#DIV/0!		0	0	#DIV/0!				#DIV/0!				#DIV/0!				#DIV/0!				#DIV/0!				#DIV/0!				#DIV/0!				#DIV/0!				#DIV/0!				#DIV/0!
		0	0	#DIV/0!	0	0	#DIV/0!		0	0	#DIV/0!				#DIV/0!				#DIV/0!				#DIV/0!				#DIV/0!				#DIV/0!				#DIV/0!				#DIV/0!				#DIV/0!				#DIV/0!
		0	0	#DIV/0!	0	0	#DIV/0!		0	0	#DIV/0!				#DIV/0!				#DIV/0!				#DIV/0!				#DIV/0!				#DIV/0!				#DIV/0!				#DIV/0!				#DIV/0!				#DIV/0!
		0	0	#DIV/0!	0	0	#DIV/0!		0	0	#DIV/0!				#DIV/0!				#DIV/0!				#DIV/0!				#DIV/0!				#DIV/0!				#DIV/0!				#DIV/0!				#DIV/0!				#DIV/0!
		0	0	#DIV/0!	0	0	#DIV/0!		0	0	#DIV/0!				#DIV/0!				#DIV/0!				#DIV/0!				#DIV/0!				#DIV/0!				#DIV/0!				#DIV/0!				#DIV/0!				#DIV/0!
		0	0	#DIV/0!	0	0	#DIV/0!		0	0	#DIV/0!				#DIV/0!				#DIV/0!				#DIV/0!				#DIV/0!				#DIV/0!				#DIV/0!				#DIV/0!				#DIV/0!				#DIV/0!
		0	0	#DIV/0!	0	0	#DIV/0!		0	0	#DIV/0!				#DIV/0!				#DIV/0!				#DIV/0!				#DIV/0!				#DIV/0!				#DIV/0!				#DIV/0!				#DIV/0!				#DIV/0!
		0	0	#DIV/0!	0	0	#DIV/0!		0	0	#DIV/0!				#DIV/0!				#DIV/0!				#DIV/0!				#DIV/0!				#DIV/0!				#DIV/0!				#DIV/0!				#DIV/0!				#DIV/0!
		0	0	#DIV/0!	0	0	#DIV/0!		0	0	#DIV/0!				#DIV/0!				#DIV/0!				#DIV/0!				#DIV/0!				#DIV/0!				#DIV/0!				#DIV/0!				#DIV/0!				#DIV/0!
		0	0	#DIV/0!	0	0	#DIV/0!		0	0	#DIV/0!				#DIV/0!				#DIV/0!				#DIV/0!				#DIV/0!				#DIV/0!				#DIV/0!				#DIV/0!				#DIV/0!				#DIV/0!
		0	0	#DIV/0!	0	0	#DIV/0!		0	0	#DIV/0!				#DIV/0!				#DIV/0!				#DIV/0!				#DIV/0!				#DIV/0!				#DIV/0!				#DIV/0!				#DIV/0!				#DIV/0!
		0	0	#DIV/0!	0	0	#DIV/0!		0	0	#DIV/0!				#DIV/0!				#DIV/0!				#DIV/0!				#DIV/0!				#DIV/0!				#DIV/0!				#DIV/0!				#DIV/0!				#DIV/0!
		0	0	#DIV/0!	0	0	#DIV/0!		0	0	#DIV/0!				#DIV/0!				#DIV/0!				#DIV/0!				#DIV/0!				#DIV/0!				#DIV/0!				#DIV/0!				#DIV/0!				#DIV/0!
		0	0	#DIV/0!	0	0	#DIV/0!		0	0	#DIV/0!				#DIV/0!				#DIV/0!				#DIV/0!				#DIV/0!				#DIV/0!				#DIV/0!				#DIV/0!				#DIV/0!				#DIV/0!
		0	0	#DIV/0!	0	0	#DIV/0!		0	0	#DIV/0!				#DIV/0!				#DIV/0!				#DIV/0!				#DIV/0!				#DIV/0!				#DIV/0!				#DIV/0!				#DIV/0!				#DIV/0!
		0	0	#DIV/0!	0	0	#DIV/0!		0	0	#DIV/0!				#DIV/0!				#DIV/0!				#DIV/0!				#DIV/0!				#DIV/0!				#DIV/0!				#DIV/0!				#DIV/0!				#DIV/0!
		0	0	#DIV/0!	0	0	#DIV/0!		0	0	#DIV/0!				#DIV/0!				#DIV/0!				#DIV/0!				#DIV/0!				#DIV/0!				#DIV/0!				#DIV/0!				#DIV/0!				#DIV/0!
		0	0	#DIV/0!	0	0	#DIV/0!		0	0	#DIV/0!				#DIV/0!				#DIV/0!				#DIV/0!				#DIV/0!				#DIV/0!				#DIV/0!				#DIV/0!				#DIV/0!				#DIV/0!
		0	0	#DIV/0!	0	0	#DIV/0!		0	0	#DIV/0!				#DIV/0!				#DIV/0!				#DIV/0!				#DIV/0!				#DIV/0!				#DIV/0!				#DIV/0!				#DIV/0!				#DIV/0!
		0	0	#DIV/0!	0	0	#DIV/0!		0	0	#DIV/0!				#DIV/0!				#DIV/0!				#DIV/0!				#DIV/0!				#DIV/0!				#DIV/0!				#DIV/0!				#DIV/0!				#DIV/0!
		0	0	#DIV/0!	0	0	#DIV/0!		0	0	#DIV/0!				#DIV/0!				#DIV/0!				#DIV/0!				#DIV/0!				#DIV/0!				#DIV/0!				#DIV/0!				#DIV/0!				#DIV/0!
		0	0	#DIV/0!	0	0	#DIV/0!		0	0	#DIV/0!				#DIV/0!				#DIV/0!				#DIV/0!				#DIV/0!				#DIV/0!				#DIV/0!				#DIV/0!				#DIV/0!				#DIV/0!
		0	0	#DIV/0!	0	0	#DIV/0!		0	0	#DIV/0!				#DIV/0!				#DIV/0!				#DIV/0!				#DIV/0!				#DIV/0!				#DIV/0!				#DIV/0!				#DIV/0!				#DIV/0!
		0	0	#DIV/0!	0	0	#DIV/0!		0	0	#DIV/0!				#DIV/0!				#DIV/0!				#DIV/0!				#DIV/0!				#DIV/0!				#DIV/0!				#DIV/0!				#DIV/0!				#DIV/0!
		0	0	#DIV/0!	0	0	#DIV/0!		0	0	#DIV/0!				#DIV/0!				#DIV/0!				#DIV/0!				#DIV/0!				#DIV/0!				#DIV/0!				#DIV/0!				#DIV/0!				#DIV/0!
		0	0	#DIV/0!	0	0	#DIV/0!		0	0	#DIV/0!				#DIV/0!				#DIV/0!				#DIV/0!				#DIV/0!				#DIV/0!				#DIV/0!				#DIV/0!				#DIV/0!				#DIV/0!
		0	0	#DIV/0!	0	0	#DIV/0!		0	0	#DIV/0!				#DIV/0!				#DIV/0!				#DIV/0!				#DIV/0!				#DIV/0!				#DIV/0!				#DIV/0!				#DIV/0!				#DIV/0!
		0	0	#DIV/0!	0	0	#DIV/0!		0	0	#DIV/0!				#DIV/0!				#DIV/0!				#DIV/0!				#DIV/0!				#DIV/0!				#DIV/0!				#DIV/0!				#DIV/0!				#DIV/0!
		0	0	#DIV/0!	0	0	#DIV/0!		0	0	#DIV/0!				#DIV/0!				#DIV/0!				#DIV/0!				#DIV/0!				#DIV/0!				#DIV/0!				#DIV/0!				#DIV/0!				#DIV/0!
		0	0	#DIV/0!	0	0	#DIV/0!		0	0	#DIV/0!				#DIV/0!				#DIV/0!				#DIV/0!				#DIV/0!				#DIV/0!				#DIV/0!				#DIV/0!				#DIV/0!				#DIV/0!
		0	0	#DIV/0!	0	0	#DIV/0!		0	0	#DIV/0!				#DIV/0!				#DIV/0!				#DIV/0!				#DIV/0!				#DIV/0!				#DIV/0!				#DIV/0!				#DIV/0!				#DIV/0!
		0	0	#DIV/0!	0	0	#DIV/0!		0	0	#DIV/0!				#DIV/0!				#DIV/0!				#DIV/0!				#DIV/0!				#DIV/0!				#DIV/0!				#DIV/0!				#DIV/0!				#DIV/0!
		0	0	#DIV/0!	0	0	#DIV/0!		0	0	#DIV/0!				#DIV/0!				#DIV/0!				#DIV/0!				#DIV/0!				#DIV/0!				#DIV/0!				#DIV/0!				#DIV/0!				#DIV/0!
		0	0	#DIV/0!	0	0	#DIV/0!		0	0	#DIV/0!				#DIV/0!				#DIV/0!				#DIV/0!				#DIV/0!				#DIV/0!				#DIV/0!				#DIV/0!				#DIV/0!				#DIV/0!
		0	0	#DIV/0!	0	0	#DIV/0!		0	0	#DIV/0!				#DIV/0!				#DIV/0!				#DIV/0!				#DIV/0!				#DIV/0!				#DIV/0!				#DIV/0!				#DIV/0!				#DIV/0!
		0	0	#DIV/0!	0	0	#DIV/0!		0	0	#DIV/0!				#DIV/0!				#DIV/0!				#DIV/0!				#DIV/0!				#DIV/0!				#DIV/0!				#DIV/0!				#DIV/0!				#DIV/0!
		0	0	#DIV/0!	0	0	#DIV/0!		0	0	#DIV/0!				#DIV/0!				#DIV/0!				#DIV/0!				#DIV/0!				#DIV/0!				#DIV/0!				#DIV/0!				#DIV/0!				#DIV/0!
		0	0	#DIV/0!	0	0	#DIV/0!		0	0	#DIV/0!				#DIV/0!				#DIV/0!				#DIV/0!				#DIV/0!				#DIV/0!				#DIV/0!				#DIV/0!				#DIV/0!				#DIV/0!
		0	0	#DIV/0!	0	0	#DIV/0!		0	0	#DIV/0!				#DIV/0!				#DIV/0!				#DIV/0!				#DIV/0!				#DIV/0!				#DIV/0!				#DIV/0!				#DIV/0!				#DIV/0!
		0	0	#DIV/0!	0	0	#DIV/0!		0	0	#DIV/0!				#DIV/0!				#DIV/0!				#DIV/0!				#DIV/0!				#DIV/0!				#DIV/0!				#DIV/0!				#DIV/0!				#DIV/0!
		0	0	#DIV/0!	0	0	#DIV/0!		0	0	#DIV/0!				#DIV/0!				#DIV/0!				#DIV/0!				#DIV/0!				#DIV/0!				#DIV/0!				#DIV/0!				#DIV/0!				#DIV/0!
		0	0	#DIV/0!	0	0	#DIV/0!		0	0	#DIV/0!				#DIV/0!				#DIV/0!				#DIV/0!				#DIV/0!				#DIV/0!				#DIV/0!				#DIV/0!				#DIV/0!				#DIV/0!
		0	0	#DIV/0!	0	0	#DIV/0!		0	0	#DIV/0!				#DIV/0!				#DIV/0!				#DIV/0!				#DIV/0!				#DIV/0!				#DIV/0!				#DIV/0!				#DIV/0!				#DIV/0!
		0	0	#DIV/0!	0	0	#DIV/0!		0	0	#DIV/0!				#DIV/0!				#DIV/0!				#DIV/0!				#DIV/0!				#DIV/0!				#DIV/0!				#DIV/0!				#DIV/0!				#DIV/0!
		0	0	#DIV/0!	0	0	#DIV/0!		0	0	#DIV/0!				#DIV/0!				#DIV/0!				#DIV/0!				#DIV/0!				#DIV/0!				#DIV/0!				#DIV/0!				#DIV/0!				#DIV/0!
		0	0	#DIV/0!	0	0	#DIV/0!		0	0	#DIV/0!				#DIV/0!				#DIV/0!				#DIV/0!				#DIV/0!				#DIV/0!				#DIV/0!				#DIV/0!				#DIV/0!				#DIV/0!
		0	0	#DIV/0!	0	0	#DIV/0!		0	0	#DIV/0!				#DIV/0!				#DIV/0!				#DIV/0!				#DIV/0!				#DIV/0!				#DIV/0!				#DIV/0!				#DIV/0!				#DIV/0!
		0	0	#DIV/0!	0	0	#DIV/0!		0	0	#DIV/0!				#DIV/0!				#DIV/0!				#DIV/0!				#DIV/0!				#DIV/0!				#DIV/0!				#DIV/0!				#DIV/0!				#DIV/0!
		0	0	#DIV/0!	0	0	#DIV/0!		0	0	#DIV/0!				#DIV/0!				#DIV/0!				#DIV/0!				#DIV/0!				#DIV/0!				#DIV/0!				#DIV/0!				#DIV/0!				#DIV/0!
		0	0	#DIV/0!	0	0	#DIV/0!		0	0	#DIV/0!				#DIV/0!				#DIV/0!				#DIV/0!				#DIV/0!				#DIV/0!				#DIV/0!				#DIV/0!				#DIV/0!				#DIV/0!
		0	0	#DIV/0!	0	0	#DIV/0!		0	0	#DIV/0!				#DIV/0!				#DIV/0!				#DIV/0!				#DIV/0!				#DIV/0!				#DIV/0!				#DIV/0!				#DIV/0!				#DIV/0!
		0	0	#DIV/0!	0	0	#DIV/0!		0	0	#DIV/0!				#DIV/0!				#DIV/0!				#DIV/0!				#DIV/0!				#DIV/0!				#DIV/0!				#DIV/0!				#DIV/0!				#DIV/0!
		0	0	#DIV/0!	0	0	#DIV/0!		0	0	#DIV/0!				#DIV/0!				#DIV/0!				#DIV/0!				#DIV/0!				#DIV/0!				#DIV/0!				#DIV/0!				#DIV/0!				#DIV/0!
		0	0	#DIV/0!	0	0	#DIV/0!		0	0	#DIV/0!				#DIV/0!				#DIV/0!				#DIV/0!				#DIV/0!				#DIV/0!				#DIV/0!				#DIV/0!				#DIV/0!				#DIV/0!
		0	0	#DIV/0!	0	0	#DIV/0!		0	0	#DIV/0!				#DIV/0!				#DIV/0!				#DIV/0!				#DIV/0!				#DIV/0!				#DIV/0!				#DIV/0!				#DIV/0!				#DIV/0!
		0	0	#DIV/0!	0	0	#DIV/0!		0	0	#DIV/0!				#DIV/0!				#DIV/0!				#DIV/0!				#DIV/0!				#DIV/0!				#DIV/0!				#DIV/0!				#DIV/0!				#DIV/0!
		0	0	#DIV/0!	0	0	#DIV/0!		0	0	#DIV/0!				#DIV/0!				#DIV/0!				#DIV/0!				#DIV/0!				#DIV/0!				#DIV/0!				#DIV/0!				#DIV/0!				#DIV/0!
		0	0	#DIV/0!	0	0	#DIV/0!		0	0	#DIV/0!				#DIV/0!				#DIV/0!				#DIV/0!				#DIV/0!				#DIV/0!				#DIV/0!				#DIV/0!				#DIV/0!				#DIV/0!
		0	0	#DIV/0!	0	0	#DIV/0!		0	0	#DIV/0!				#DIV/0!				#DIV/0!				#DIV/0!				#DIV/0!				#DIV/0!				#DIV/0!				#DIV/0!				#DIV/0!				#DIV/0!
		0	0	#DIV/0!	0	0	#DIV/0!		0	0	#DIV/0!				#DIV/0!				#DIV/0!				#DIV/0!				#DIV/0!				#DIV/0!				#DIV/0!				#DIV/0!				#DIV/0!				#DIV/0!
		0	0	#DIV/0!	0	0	#DIV/0!		0	0	#DIV/0!				#DIV/0!				#DIV/0!				#DIV/0!				#DIV/0!				#DIV/0!				#DIV/0!				#DIV/0!				#DIV/0!				#DIV/0!
		0	0	#DIV/0!	0	0	#DIV/0!		0	0	#DIV/0!				#DIV/0!				#DIV/0!				#DIV/0!				#DIV/0!				#DIV/0!				#DIV/0!				#DIV/0!				#DIV/0!				#DIV/0!
		0	0	#DIV/0!	0	0	#DIV/0!		0	0	#DIV/0!				#DIV/0!				#DIV/0!				#DIV/0!				#DIV/0!				#DIV/0!				#DIV/0!				#DIV/0!				#DIV/0!				#DIV/0!
		0	0	#DIV/0!	0	0	#DIV/0!		0	0	#DIV/0!				#DIV/0!				#DIV/0!				#DIV/0!				#DIV/0!				#DIV/0!				#DIV/0!				#DIV/0!				#DIV/0!				#DIV/0!
		0	0	#DIV/0!	0	0	#DIV/0!		0	0	#DIV/0!				#DIV/0!				#DIV/0!				#DIV/0!				#DIV/0!				#DIV/0!				#DIV/0!				#DIV/0!				#DIV/0!				#DIV/0!
		0	0	#DIV/0!	0	0	#DIV/0!		0	0	#DIV/0!				#DIV/0!				#DIV/0!				#DIV/0!				#DIV/0!				#DIV/0!				#DIV/0!				#DIV/0!				#DIV/0!				#DIV/0!
		0	0	#DIV/0!	0	0	#DIV/0!		0	0	#DIV/0!				#DIV/0!				#DIV/0!				#DIV/0!				#DIV/0!				#DIV/0!				#DIV/0!				#DIV/0!				#DIV/0!				#DIV/0!
		0	0	#DIV/0!	0	0	#DIV/0!		0	0	#DIV/0!				#DIV/0!				#DIV/0!				#DIV/0!				#DIV/0!				#DIV/0!				#DIV/0!				#DIV/0!				#DIV/0!				#DIV/0!
		0	0	#DIV/0!	0	0	#DIV/0!		0	0	#DIV/0!				#DIV/0!				#DIV/0!				#DIV/0!				#DIV/0!				#DIV/0!				#DIV/0!				#DIV/0!				#DIV/0!				#DIV/0!
		0	0	#DIV/0!	0	0	#DIV/0!		0	0	#DIV/0!				#DIV/0!				#DIV/0!				#DIV/0!				#DIV/0!				#DIV/0!				#DIV/0!				#DIV/0!				#DIV/0!				#DIV/0!
		0	0	#DIV/0!	0	0	#DIV/0!		0	0	#DIV/0!				#DIV/0!				#DIV/0!				#DIV/0!				#DIV/0!				#DIV/0!				#DIV/0!				#DIV/0!				#DIV/0!				#DIV/0!
		0	0	#DIV/0!	0	0	#DIV/0!		0	0	#DIV/0!				#DIV/0!				#DIV/0!				#DIV/0!				#DIV/0!				#DIV/0!				#DIV/0!				#DIV/0!				#DIV/0!				#DIV/0!
		0	0	#DIV/0!	0	0	#DIV/0!		0	0	#DIV/0!				#DIV/0!				#DIV/0!				#DIV/0!				#DIV/0!				#DIV/0!				#DIV/0!				#DIV/0!				#DIV/0!				#DIV/0!
		0	0	#DIV/0!	0	0	#DIV/0!		0	0	#DIV/0!				#DIV/0!				#DIV/0!				#DIV/0!				#DIV/0!				#DIV/0!				#DIV/0!				#DIV/0!				#DIV/0!				#DIV/0!
		0	0	#DIV/0!	0	0	#DIV/0!		0	0	#DIV/0!				#DIV/0!				#DIV/0!				#DIV/0!				#DIV/0!				#DIV/0!				#DIV/0!				#DIV/0!				#DIV/0!				#DIV/0!
		0	0	#DIV/0!	0	0	#DIV/0!		0	0	#DIV/0!				#DIV/0!				#DIV/0!				#DIV/0!				#DIV/0!				#DIV/0!				#DIV/0!				#DIV/0!				#DIV/0!				#DIV/0!
		0	0	#DIV/0!	0	0	#DIV/0!		0	0	#DIV/0!				#DIV/0!				#DIV/0!				#DIV/0!				#DIV/0!				#DIV/0!				#DIV/0!				#DIV/0!				#DIV/0!				#DIV/0!
		0	0	#DIV/0!	0	0	#DIV/0!		0	0	#DIV/0!				#DIV/0!				#DIV/0!				#DIV/0!				#DIV/0!				#DIV/0!				#DIV/0!				#DIV/0!				#DIV/0!				#DIV/0!
		0	0	#DIV/0!	0	0	#DIV/0!		0	0	#DIV/0!				#DIV/0!				#DIV/0!				#DIV/0!				#DIV/0!				#DIV/0!				#DIV/0!				#DIV/0!				#DIV/0!				#DIV/0!
		0	0	#DIV/0!	0	0	#DIV/0!		0	0	#DIV/0!				#DIV/0!				#DIV/0!				#DIV/0!				#DIV/0!				#DIV/0!				#DIV/0!				#DIV/0!				#DIV/0!				#DIV/0!
		0	0	#DIV/0!	0	0	#DIV/0!		0	0	#DIV/0!				#DIV/0!				#DIV/0!				#DIV/0!				#DIV/0!				#DIV/0!				#DIV/0!				#DIV/0!				#DIV/0!				#DIV/0!
		0	0	#DIV/0!	0	0	#DIV/0!		0	0	#DIV/0!				#DIV/0!				#DIV/0!				#DIV/0!				#DIV/0!				#DIV/0!				#DIV/0!				#DIV/0!				#DIV/0!				#DIV/0!
		0	0	#DIV/0!	0	0	#DIV/0!		0	0	#DIV/0!				#DIV/0!				#DIV/0!				#DIV/0!				#DIV/0!				#DIV/0!				#DIV/0!				#DIV/0!				#DIV/0!				#DIV/0!
		0	0	#DIV/0!	0	0	#DIV/0!		0	0	#DIV/0!				#DIV/0!				#DIV/0!				#DIV/0!				#DIV/0!				#DIV/0!				#DIV/0!				#DIV/0!				#DIV/0!				#DIV/0!
		0	0	#DIV/0!	0	0	#DIV/0!		0	0	#DIV/0!				#DIV/0!				#DIV/0!				#DIV/0!				#DIV/0!				#DIV/0!				#DIV/0!				#DIV/0!				#DIV/0!				#DIV/0!
		0	0	#DIV/0!	0	0	#DIV/0!		0	0	#DIV/0!				#DIV/0!				#DIV/0!				#DIV/0!				#DIV/0!				#DIV/0!				#DIV/0!				#DIV/0!				#DIV/0!				#DIV/0!
		0	0	#DIV/0!	0	0	#DIV/0!		0	0	#DIV/0!				#DIV/0!				#DIV/0!				#DIV/0!				#DIV/0!				#DIV/0!				#DIV/0!				#DIV/0!				#DIV/0!				#DIV/0!
		0	0	#DIV/0!	0	0	#DIV/0!		0	0	#DIV/0!				#DIV/0!				#DIV/0!				#DIV/0!				#DIV/0!				#DIV/0!				#DIV/0!				#DIV/0!				#DIV/0!				#DIV/0!
		0	0	#DIV/0!	0	0	#DIV/0!		0	0	#DIV/0!				#DIV/0!				#DIV/0!				#DIV/0!				#DIV/0!				#DIV/0!				#DIV/0!				#DIV/0!				#DIV/0!				#DIV/0!
		0	0	#DIV/0!	0	0	#DIV/0!		0	0	#DIV/0!				#DIV/0!				#DIV/0!				#DIV/0!				#DIV/0!				#DIV/0!				#DIV/0!				#DIV/0!				#DIV/0!				#DIV/0!
		0	0	#DIV/0!	0	0	#DIV/0!		0	0	#DIV/0!				#DIV/0!				#DIV/0!				#DIV/0!				#DIV/0!				#DIV/0!				#DIV/0!				#DIV/0!				#DIV/0!				#DIV/0!
		0	0	#DIV/0!	0	0	#DIV/0!		0	0	#DIV/0!				#DIV/0!				#DIV/0!				#DIV/0!				#DIV/0!				#DIV/0!				#DIV/0!				#DIV/0!				#DIV/0!				#DIV/0!
		0	0	#DIV/0!	0	0	#DIV/0!		0	0	#DIV/0!				#DIV/0!				#DIV/0!				#DIV/0!				#DIV/0!				#DIV/0!				#DIV/0!				#DIV/0!				#DIV/0!				#DIV/0!
		0	0	#DIV/0!	0	0	#DIV/0!		0	0	#DIV/0!				#DIV/0!				#DIV/0!				#DIV/0!				#DIV/0!				#DIV/0!				#DIV/0!				#DIV/0!				#DIV/0!				#DIV/0!
		0	0	#DIV/0!	0	0	#DIV/0!		0	0	#DIV/0!				#DIV/0!				#DIV/0!				#DIV/0!				#DIV/0!				#DIV/0!				#DIV/0!				#DIV/0!				#DIV/0!				#DIV/0!
		0	0	#DIV/0!	0	0	#DIV/0!		0	0	#DIV/0!				#DIV/0!				#DIV/0!				#DIV/0!				#DIV/0!				#DIV/0!				#DIV/0!				#DIV/0!				#DIV/0!				#DIV/0!
		0	0	#DIV/0!	0	0	#DIV/0!		0	0	#DIV/0!				#DIV/0!				#DIV/0!				#DIV/0!				#DIV/0!				#DIV/0!				#DIV/0!				#DIV/0!				#DIV/0!				#DIV/0!
		0	0	#DIV/0!	0	0	#DIV/0!		0	0	#DIV/0!				#DIV/0!				#DIV/0!				#DIV/0!				#DIV/0!				#DIV/0!				#DIV/0!				#DIV/0!				#DIV/0!				#DIV/0!
		0	0	#DIV/0!	0	0	#DIV/0!		0	0	#DIV/0!				#DIV/0!				#DIV/0!				#DIV/0!				#DIV/0!				#DIV/0!				#DIV/0!				#DIV/0!				#DIV/0!				#DIV/0!
		0	0	#DIV/0!	0	0	#DIV/0!		0	0	#DIV/0!				#DIV/0!				#DIV/0!				#DIV/0!				#DIV/0!				#DIV/0!				#DIV/0!				#DIV/0!				#DIV/0!				#DIV/0!
		0	0	#DIV/0!	0	0	#DIV/0!		0	0	#DIV/0!				#DIV/0!				#DIV/0!				#DIV/0!				#DIV/0!				#DIV/0!				#DIV/0!				#DIV/0!				#DIV/0!				#DIV/0!
		0	0	#DIV/0!	0	0	#DIV/0!		0	0	#DIV/0!				#DIV/0!				#DIV/0!				#DIV/0!				#DIV/0!				#DIV/0!				#DIV/0!				#DIV/0!				#DIV/0!				#DIV/0!
		0	0	#DIV/0!	0	0	#DIV/0!		0	0	#DIV/0!				#DIV/0!				#DIV/0!				#DIV/0!				#DIV/0!				#DIV/0!				#DIV/0!				#DIV/0!				#DIV/0!				#DIV/0!
		0	0	#DIV/0!	0	0	#DIV/0!		0	0	#DIV/0!				#DIV/0!				#DIV/0!				#DIV/0!				#DIV/0!				#DIV/0!				#DIV/0!				#DIV/0!				#DIV/0!				#DIV/0!
		0	0	#DIV/0!	0	0	#DIV/0!		0	0	#DIV/0!				#DIV/0!				#DIV/0!				#DIV/0!				#DIV/0!				#DIV/0!				#DIV/0!				#DIV/0!				#DIV/0!				#DIV/0!
		0	0	#DIV/0!	0	0	#DIV/0!		0	0	#DIV/0!				#DIV/0!				#DIV/0!				#DIV/0!				#DIV/0!				#DIV/0!				#DIV/0!				#DIV/0!				#DIV/0!				#DIV/0!
		0	0	#DIV/0!	0	0	#DIV/0!		0	0	#DIV/0!				#DIV/0!				#DIV/0!				#DIV/0!				#DIV/0!				#DIV/0!				#DIV/0!				#DIV/0!				#DIV/0!				#DIV/0!
		0	0	#DIV/0!	0	0	#DIV/0!		0	0	#DIV/0!				#DIV/0!				#DIV/0!				#DIV/0!				#DIV/0!				#DIV/0!				#DIV/0!				#DIV/0!				#DIV/0!				#DIV/0!
		0	0	#DIV/0!	0	0	#DIV/0!		0	0	#DIV/0!				#DIV/0!				#DIV/0!				#DIV/0!				#DIV/0!				#DIV/0!				#DIV/0!				#DIV/0!				#DIV/0!				#DIV/0!
		0	0	#DIV/0!	0	0	#DIV/0!		0	0	#DIV/0!				#DIV/0!				#DIV/0!				#DIV/0!				#DIV/0!				#DIV/0!				#DIV/0!				#DIV/0!				#DIV/0!				#DIV/0!
		0	0	#DIV/0!	0	0	#DIV/0!		0	0	#DIV/0!				#DIV/0!				#DIV/0!				#DIV/0!				#DIV/0!				#DIV/0!				#DIV/0!				#DIV/0!				#DIV/0!				#DIV/0!
		0	0	#DIV/0!	0	0	#DIV/0!		0	0	#DIV/0!				#DIV/0!				#DIV/0!				#DIV/0!				#DIV/0!				#DIV/0!				#DIV/0!				#DIV/0!				#DIV/0!				#DIV/0!
		0	0	#DIV/0!	0	0	#DIV/0!		0	0	#DIV/0!				#DIV/0!				#DIV/0!				#DIV/0!				#DIV/0!				#DIV/0!				#DIV/0!				#DIV/0!				#DIV/0!				#DIV/0!
		0	0	#DIV/0!	0	0	#DIV/0!		0	0	#DIV/0!				#DIV/0!				#DIV/0!				#DIV/0!				#DIV/0!				#DIV/0!				#DIV/0!				#DIV/0!				#DIV/0!				#DIV/0!
		0	0	#DIV/0!	0	0	#DIV/0!		0	0	#DIV/0!				#DIV/0!				#DIV/0!				#DIV/0!				#DIV/0!				#DIV/0!				#DIV/0!				#DIV/0!				#DIV/0!				#DIV/0!
		0	0	#DIV/0!	0	0	#DIV/0!		0	0	#DIV/0!				#DIV/0!				#DIV/0!				#DIV/0!				#DIV/0!				#DIV/0!				#DIV/0!				#DIV/0!				#DIV/0!				#DIV/0!
		0	0	#DIV/0!	0	0	#DIV/0!		0	0	#DIV/0!				#DIV/0!				#DIV/0!				#DIV/0!				#DIV/0!				#DIV/0!				#DIV/0!				#DIV/0!				#DIV/0!				#DIV/0!
		0	0	#DIV/0!	0	0	#DIV/0!		0	0	#DIV/0!				#DIV/0!				#DIV/0!				#DIV/0!				#DIV/0!				#DIV/0!				#DIV/0!				#DIV/0!				#DIV/0!				#DIV/0!
		0	0	#DIV/0!	0	0	#DIV/0!		0	0	#DIV/0!				#DIV/0!				#DIV/0!				#DIV/0!				#DIV/0!				#DIV/0!				#DIV/0!				#DIV/0!				#DIV/0!				#DIV/0!
		0	0	#DIV/0!	0	0	#DIV/0!		0	0	#DIV/0!				#DIV/0!				#DIV/0!				#DIV/0!				#DIV/0!				#DIV/0!				#DIV/0!				#DIV/0!				#DIV/0!				#DIV/0!
		0	0	#DIV/0!	0	0	#DIV/0!		0	0	#DIV/0!				#DIV/0!				#DIV/0!				#DIV/0!				#DIV/0!				#DIV/0!				#DIV/0!				#DIV/0!				#DIV/0!				#DIV/0!
		0	0	#DIV/0!	0	0	#DIV/0!		0	0	#DIV/0!				#DIV/0!				#DIV/0!				#DIV/0!				#DIV/0!				#DIV/0!				#DIV/0!				#DIV/0!				#DIV/0!				#DIV/0!
		0	0	#DIV/0!	0	0	#DIV/0!		0	0	#DIV/0!				#DIV/0!				#DIV/0!				#DIV/0!				#DIV/0!				#DIV/0!				#DIV/0!				#DIV/0!				#DIV/0!				#DIV/0!
		0	0	#DIV/0!	0	0	#DIV/0!		0	0	#DIV/0!				#DIV/0!				#DIV/0!				#DIV/0!				#DIV/0!				#DIV/0!				#DIV/0!				#DIV/0!				#DIV/0!				#DIV/0!
		0	0	#DIV/0!	0	0	#DIV/0!		0	0	#DIV/0!				#DIV/0!				#DIV/0!				#DIV/0!				#DIV/0!				#DIV/0!				#DIV/0!				#DIV/0!				#DIV/0!				#DIV/0!
		0	0	#DIV/0!	0	0	#DIV/0!		0	0	#DIV/0!				#DIV/0!				#DIV/0!				#DIV/0!				#DIV/0!				#DIV/0!				#DIV/0!				#DIV/0!				#DIV/0!				#DIV/0!
		0	0	#DIV/0!	0	0	#DIV/0!		0	0	#DIV/0!				#DIV/0!				#DIV/0!				#DIV/0!				#DIV/0!				#DIV/0!				#DIV/0!				#DIV/0!				#DIV/0!				#DIV/0!
		0	0	#DIV/0!	0	0	#DIV/0!		0	0	#DIV/0!				#DIV/0!				#DIV/0!				#DIV/0!				#DIV/0!				#DIV/0!				#DIV/0!				#DIV/0!				#DIV/0!				#DIV/0!
		0	0	#DIV/0!	0	0	#DIV/0!		0	0	#DIV/0!				#DIV/0!				#DIV/0!				#DIV/0!				#DIV/0!				#DIV/0!				#DIV/0!				#DIV/0!				#DIV/0!				#DIV/0!
		0	0	#DIV/0!	0	0	#DIV/0!		0	0	#DIV/0!				#DIV/0!				#DIV/0!				#DIV/0!				#DIV/0!				#DIV/0!				#DIV/0!				#DIV/0!				#DIV/0!				#DIV/0!
		0	0	#DIV/0!	0	0	#DIV/0!		0	0	#DIV/0!				#DIV/0!				#DIV/0!				#DIV/0!				#DIV/0!				#DIV/0!				#DIV/0!				#DIV/0!				#DIV/0!				#DIV/0!
		0	0	#DIV/0!	0	0	#DIV/0!		0	0	#DIV/0!				#DIV/0!				#DIV/0!				#DIV/0!				#DIV/0!				#DIV/0!				#DIV/0!				#DIV/0!				#DIV/0!				#DIV/0!
		0	0	#DIV/0!	0	0	#DIV/0!		0	0	#DIV/0!				#DIV/0!				#DIV/0!				#DIV/0!				#DIV/0!				#DIV/0!				#DIV/0!				#DIV/0!				#DIV/0!				#DIV/0!
		0	0	#DIV/0!	0	0	#DIV/0!		0	0	#DIV/0!				#DIV/0!				#DIV/0!				#DIV/0!				#DIV/0!				#DIV/0!				#DIV/0!				#DIV/0!				#DIV/0!				#DIV/0!
		0	0	#DIV/0!	0	0	#DIV/0!		0	0	#DIV/0!				#DIV/0!				#DIV/0!				#DIV/0!				#DIV/0!				#DIV/0!				#DIV/0!				#DIV/0!				#DIV/0!				#DIV/0!
		0	0	#DIV/0!	0	0	#DIV/0!		0	0	#DIV/0!				#DIV/0!				#DIV/0!				#DIV/0!				#DIV/0!				#DIV/0!				#DIV/0!				#DIV/0!				#DIV/0!				#DIV/0!
		0	0	#DIV/0!	0	0	#DIV/0!		0	0	#DIV/0!				#DIV/0!				#DIV/0!				#DIV/0!				#DIV/0!				#DIV/0!				#DIV/0!				#DIV/0!				#DIV/0!				#DIV/0!
		0	0	#DIV/0!	0	0	#DIV/0!		0	0	#DIV/0!				#DIV/0!				#DIV/0!				#DIV/0!				#DIV/0!				#DIV/0!				#DIV/0!				#DIV/0!				#DIV/0!				#DIV/0!
		0	0	#DIV/0!	0	0	#DIV/0!		0	0	#DIV/0!				#DIV/0!				#DIV/0!				#DIV/0!				#DIV/0!				#DIV/0!				#DIV/0!				#DIV/0!				#DIV/0!				#DIV/0!
		0	0	#DIV/0!	0	0	#DIV/0!		0	0	#DIV/0!				#DIV/0!				#DIV/0!				#DIV/0!				#DIV/0!				#DIV/0!				#DIV/0!				#DIV/0!				#DIV/0!				#DIV/0!
		0	0	#DIV/0!	0	0	#DIV/0!		0	0	#DIV/0!				#DIV/0!				#DIV/0!				#DIV/0!				#DIV/0!				#DIV/0!				#DIV/0!				#DIV/0!				#DIV/0!				#DIV/0!
		0	0	#DIV/0!	0	0	#DIV/0!		0	0	#DIV/0!				#DIV/0!				#DIV/0!				#DIV/0!				#DIV/0!				#DIV/0!				#DIV/0!				#DIV/0!				#DIV/0!				#DIV/0!
		0	0	#DIV/0!	0	0	#DIV/0!		0	0	#DIV/0!				#DIV/0!				#DIV/0!				#DIV/0!				#DIV/0!				#DIV/0!				#DIV/0!				#DIV/0!				#DIV/0!				#DIV/0!
		0	0	#DIV/0!	0	0	#DIV/0!		0	0	#DIV/0!				#DIV/0!				#DIV/0!				#DIV/0!				#DIV/0!				#DIV/0!				#DIV/0!				#DIV/0!				#DIV/0!				#DIV/0!
		0	0	#DIV/0!	0	0	#DIV/0!		0	0	#DIV/0!				#DIV/0!				#DIV/0!				#DIV/0!				#DIV/0!				#DIV/0!				#DIV/0!				#DIV/0!				#DIV/0!				#DIV/0!
		0	0	#DIV/0!	0	0	#DIV/0!		0	0	#DIV/0!				#DIV/0!				#DIV/0!				#DIV/0!				#DIV/0!				#DIV/0!				#DIV/0!				#DIV/0!				#DIV/0!				#DIV/0!
		0	0	#DIV/0!	0	0	#DIV/0!		0	0	#DIV/0!				#DIV/0!				#DIV/0!				#DIV/0!				#DIV/0!				#DIV/0!				#DIV/0!				#DIV/0!				#DIV/0!				#DIV/0!
		0	0	#DIV/0!	0	0	#DIV/0!		0	0	#DIV/0!				#DIV/0!				#DIV/0!				#DIV/0!				#DIV/0!				#DIV/0!				#DIV/0!				#DIV/0!				#DIV/0!				#DIV/0!
		0	0	#DIV/0!	0	0	#DIV/0!		0	0	#DIV/0!				#DIV/0!				#DIV/0!				#DIV/0!				#DIV/0!				#DIV/0!				#DIV/0!				#DIV/0!				#DIV/0!				#DIV/0!
		0	0	#DIV/0!	0	0	#DIV/0!		0	0	#DIV/0!				#DIV/0!				#DIV/0!				#DIV/0!				#DIV/0!				#DIV/0!				#DIV/0!				#DIV/0!				#DIV/0!				#DIV/0!
		0	0	#DIV/0!	0	0	#DIV/0!		0	0	#DIV/0!				#DIV/0!				#DIV/0!				#DIV/0!				#DIV/0!				#DIV/0!				#DIV/0!				#DIV/0!				#DIV/0!				#DIV/0!
		0	0	#DIV/0!	0	0	#DIV/0!		0	0	#DIV/0!				#DIV/0!				#DIV/0!				#DIV/0!				#DIV/0!				#DIV/0!				#DIV/0!				#DIV/0!				#DIV/0!				#DIV/0!
		0	0	#DIV/0!	0	0	#DIV/0!		0	0	#DIV/0!				#DIV/0!				#DIV/0!				#DIV/0!				#DIV/0!				#DIV/0!				#DIV/0!				#DIV/0!				#DIV/0!				#DIV/0!
		0	0	#DIV/0!	0	0	#DIV/0!		0	0	#DIV/0!				#DIV/0!				#DIV/0!				#DIV/0!				#DIV/0!				#DIV/0!				#DIV/0!				#DIV/0!				#DIV/0!				#DIV/0!
		0	0	#DIV/0!	0	0	#DIV/0!		0	0	#DIV/0!				#DIV/0!				#DIV/0!				#DIV/0!				#DIV/0!				#DIV/0!				#DIV/0!				#DIV/0!				#DIV/0!				#DIV/0!
		0	0	#DIV/0!	0	0	#DIV/0!		0	0	#DIV/0!				#DIV/0!				#DIV/0!				#DIV/0!				#DIV/0!				#DIV/0!				#DIV/0!				#DIV/0!				#DIV/0!				#DIV/0!
		0	0	#DIV/0!	0	0	#DIV/0!		0	0	#DIV/0!				#DIV/0!				#DIV/0!				#DIV/0!				#DIV/0!				#DIV/0!				#DIV/0!				#DIV/0!				#DIV/0!				#DIV/0!
		0	0	#DIV/0!	0	0	#DIV/0!		0	0	#DIV/0!				#DIV/0!				#DIV/0!				#DIV/0!				#DIV/0!				#DIV/0!				#DIV/0!				#DIV/0!				#DIV/0!				#DIV/0!
		0	0	#DIV/0!	0	0	#DIV/0!		0	0	#DIV/0!				#DIV/0!				#DIV/0!				#DIV/0!				#DIV/0!				#DIV/0!				#DIV/0!				#DIV/0!				#DIV/0!				#DIV/0!
		0	0	#DIV/0!	0	0	#DIV/0!		0	0	#DIV/0!				#DIV/0!				#DIV/0!				#DIV/0!				#DIV/0!				#DIV/0!				#DIV/0!				#DIV/0!				#DIV/0!				#DIV/0!
		0	0	#DIV/0!	0	0	#DIV/0!		0	0	#DIV/0!				#DIV/0!				#DIV/0!				#DIV/0!				#DIV/0!				#DIV/0!				#DIV/0!				#DIV/0!				#DIV/0!				#DIV/0!
		0	0	#DIV/0!	0	0	#DIV/0!		0	0	#DIV/0!				#DIV/0!				#DIV/0!				#DIV/0!				#DIV/0!				#DIV/0!				#DIV/0!				#DIV/0!				#DIV/0!				#DIV/0!
		0	0	#DIV/0!	0	0	#DIV/0!		0	0	#DIV/0!				#DIV/0!				#DIV/0!				#DIV/0!				#DIV/0!				#DIV/0!				#DIV/0!				#DIV/0!				#DIV/0!				#DIV/0!
		0	0	#DIV/0!	0	0	#DIV/0!		0	0	#DIV/0!				#DIV/0!				#DIV/0!				#DIV/0!				#DIV/0!				#DIV/0!				#DIV/0!				#DIV/0!				#DIV/0!				#DIV/0!
		0	0	#DIV/0!	0	0	#DIV/0!		0	0	#DIV/0!				#DIV/0!				#DIV/0!				#DIV/0!				#DIV/0!				#DIV/0!				#DIV/0!				#DIV/0!				#DIV/0!				#DIV/0!
		0	0	#DIV/0!	0	0	#DIV/0!		0	0	#DIV/0!				#DIV/0!				#DIV/0!				#DIV/0!				#DIV/0!				#DIV/0!				#DIV/0!				#DIV/0!				#DIV/0!				#DIV/0!
		0	0	#DIV/0!	0	0	#DIV/0!		0	0	#DIV/0!				#DIV/0!				#DIV/0!				#DIV/0!				#DIV/0!				#DIV/0!				#DIV/0!				#DIV/0!				#DIV/0!				#DIV/0!
		0	0	#DIV/0!	0	0	#DIV/0!		0	0	#DIV/0!				#DIV/0!				#DIV/0!				#DIV/0!				#DIV/0!				#DIV/0!				#DIV/0!				#DIV/0!				#DIV/0!				#DIV/0!
		0	0	#DIV/0!	0	0	#DIV/0!		0	0	#DIV/0!				#DIV/0!				#DIV/0!				#DIV/0!				#DIV/0!				#DIV/0!				#DIV/0!				#DIV/0!				#DIV/0!				#DIV/0!
		0	0	#DIV/0!	0	0	#DIV/0!		0	0	#DIV/0!				#DIV/0!				#DIV/0!				#DIV/0!				#DIV/0!				#DIV/0!				#DIV/0!				#DIV/0!				#DIV/0!				#DIV/0!
		0	0	#DIV/0!	0	0	#DIV/0!		0	0	#DIV/0!				#DIV/0!				#DIV/0!				#DIV/0!				#DIV/0!				#DIV/0!				#DIV/0!				#DIV/0!				#DIV/0!				#DIV/0!
		0	0	#DIV/0!	0	0	#DIV/0!		0	0	#DIV/0!				#DIV/0!				#DIV/0!				#DIV/0!				#DIV/0!				#DIV/0!				#DIV/0!				#DIV/0!				#DIV/0!				#DIV/0!
		0	0	#DIV/0!	0	0	#DIV/0!		0	0	#DIV/0!				#DIV/0!				#DIV/0!				#DIV/0!				#DIV/0!				#DIV/0!				#DIV/0!				#DIV/0!				#DIV/0!				#DIV/0!
		0	0	#DIV/0!	0	0	#DIV/0!		0	0	#DIV/0!				#DIV/0!				#DIV/0!				#DIV/0!				#DIV/0!				#DIV/0!				#DIV/0!				#DIV/0!				#DIV/0!				#DIV/0!
		0	0	#DIV/0!	0	0	#DIV/0!		0	0	#DIV/0!				#DIV/0!				#DIV/0!				#DIV/0!				#DIV/0!				#DIV/0!				#DIV/0!				#DIV/0!				#DIV/0!				#DIV/0!
		0	0	#DIV/0!	0	0	#DIV/0!		0	0	#DIV/0!				#DIV/0!				#DIV/0!				#DIV/0!				#DIV/0!				#DIV/0!				#DIV/0!				#DIV/0!				#DIV/0!				#DIV/0!
		0	0	#DIV/0!	0	0	#DIV/0!		0	0	#DIV/0!				#DIV/0!				#DIV/0!				#DIV/0!				#DIV/0!				#DIV/0!				#DIV/0!				#DIV/0!				#DIV/0!				#DIV/0!
		0	0	#DIV/0!	0	0	#DIV/0!		0	0	#DIV/0!				#DIV/0!				#DIV/0!				#DIV/0!				#DIV/0!				#DIV/0!				#DIV/0!				#DIV/0!				#DIV/0!				#DIV/0!
		0	0	#DIV/0!	0	0	#DIV/0!		0	0	#DIV/0!				#DIV/0!				#DIV/0!				#DIV/0!				#DIV/0!				#DIV/0!				#DIV/0!				#DIV/0!				#DIV/0!				#DIV/0!
		0	0	#DIV/0!	0	0	#DIV/0!		0	0	#DIV/0!				#DIV/0!				#DIV/0!				#DIV/0!				#DIV/0!				#DIV/0!				#DIV/0!				#DIV/0!				#DIV/0!				#DIV/0!
		0	0	#DIV/0!	0	0	#DIV/0!		0	0	#DIV/0!				#DIV/0!				#DIV/0!				#DIV/0!				#DIV/0!				#DIV/0!				#DIV/0!				#DIV/0!				#DIV/0!				#DIV/0!
		0	0	#DIV/0!	0	0	#DIV/0!		0	0	#DIV/0!				#DIV/0!				#DIV/0!				#DIV/0!				#DIV/0!				#DIV/0!				#DIV/0!				#DIV/0!				#DIV/0!				#DIV/0!
		0	0	#DIV/0!	0	0	#DIV/0!		0	0	#DIV/0!				#DIV/0!				#DIV/0!				#DIV/0!				#DIV/0!				#DIV/0!				#DIV/0!				#DIV/0!				#DIV/0!				#DIV/0!
		0	0	#DIV/0!	0	0	#DIV/0!		0	0	#DIV/0!				#DIV/0!				#DIV/0!				#DIV/0!				#DIV/0!				#DIV/0!				#DIV/0!				#DIV/0!				#DIV/0!				#DIV/0!
		0	0	#DIV/0!	0	0	#DIV/0!		0	0	#DIV/0!				#DIV/0!				#DIV/0!				#DIV/0!				#DIV/0!				#DIV/0!				#DIV/0!				#DIV/0!				#DIV/0!				#DIV/0!
		0	0	#DIV/0!	0	0	#DIV/0!		0	0	#DIV/0!				#DIV/0!				#DIV/0!				#DIV/0!				#DIV/0!				#DIV/0!				#DIV/0!				#DIV/0!				#DIV/0!				#DIV/0!
		0	0	#DIV/0!	0	0	#DIV/0!		0	0	#DIV/0!				#DIV/0!				#DIV/0!				#DIV/0!				#DIV/0!				#DIV/0!				#DIV/0!				#DIV/0!				#DIV/0!				#DIV/0!
		0	0	#DIV/0!	0	0	#DIV/0!		0	0	#DIV/0!				#DIV/0!				#DIV/0!				#DIV/0!				#DIV/0!				#DIV/0!				#DIV/0!				#DIV/0!				#DIV/0!				#DIV/0!
		0	0	#DIV/0!	0	0	#DIV/0!		0	0	#DIV/0!				#DIV/0!				#DIV/0!				#DIV/0!				#DIV/0!				#DIV/0!				#DIV/0!				#DIV/0!				#DIV/0!				#DIV/0!
		0	0	#DIV/0!	0	0	#DIV/0!		0	0	#DIV/0!				#DIV/0!				#DIV/0!				#DIV/0!				#DIV/0!				#DIV/0!				#DIV/0!				#DIV/0!				#DIV/0!				#DIV/0!
		0	0	#DIV/0!	0	0	#DIV/0!		0	0	#DIV/0!				#DIV/0!				#DIV/0!				#DIV/0!				#DIV/0!				#DIV/0!				#DIV/0!				#DIV/0!				#DIV/0!				#DIV/0!
		0	0	#DIV/0!	0	0	#DIV/0!		0	0	#DIV/0!				#DIV/0!				#DIV/0!				#DIV/0!				#DIV/0!				#DIV/0!				#DIV/0!				#DIV/0!				#DIV/0!				#DIV/0!
		0	0	#DIV/0!	0	0	#DIV/0!		0	0	#DIV/0!				#DIV/0!				#DIV/0!				#DIV/0!				#DIV/0!				#DIV/0!				#DIV/0!				#DIV/0!				#DIV/0!				#DIV/0!
		0	0	#DIV/0!	0	0	#DIV/0!		0	0	#DIV/0!				#DIV/0!				#DIV/0!				#DIV/0!				#DIV/0!				#DIV/0!				#DIV/0!				#DIV/0!				#DIV/0!				#DIV/0!
		0	0	#DIV/0!	0	0	#DIV/0!		0	0	#DIV/0!				#DIV/0!				#DIV/0!				#DIV/0!				#DIV/0!				#DIV/0!				#DIV/0!				#DIV/0!				#DIV/0!				#DIV/0!
		0	0	#DIV/0!	0	0	#DIV/0!		0	0	#DIV/0!				#DIV/0!				#DIV/0!				#DIV/0!				#DIV/0!				#DIV/0!				#DIV/0!				#DIV/0!				#DIV/0!				#DIV/0!
		0	0	#DIV/0!	0	0	#DIV/0!		0	0	#DIV/0!				#DIV/0!				#DIV/0!				#DIV/0!				#DIV/0!				#DIV/0!				#DIV/0!				#DIV/0!				#DIV/0!				#DIV/0!
		0	0	#DIV/0!	0	0	#DIV/0!		0	0	#DIV/0!				#DIV/0!				#DIV/0!				#DIV/0!				#DIV/0!				#DIV/0!				#DIV/0!				#DIV/0!				#DIV/0!				#DIV/0!
		0	0	#DIV/0!	0	0	#DIV/0!		0	0	#DIV/0!				#DIV/0!				#DIV/0!				#DIV/0!				#DIV/0!				#DIV/0!				#DIV/0!				#DIV/0!				#DIV/0!				#DIV/0!
		0	0	#DIV/0!	0	0	#DIV/0!		0	0	#DIV/0!				#DIV/0!				#DIV/0!				#DIV/0!				#DIV/0!				#DIV/0!				#DIV/0!				#DIV/0!				#DIV/0!				#DIV/0!
		0	0	#DIV/0!	0	0	#DIV/0!		0	0	#DIV/0!				#DIV/0!				#DIV/0!				#DIV/0!				#DIV/0!				#DIV/0!				#DIV/0!				#DIV/0!				#DIV/0!				#DIV/0!
		0	0	#DIV/0!	0	0	#DIV/0!		0	0	#DIV/0!				#DIV/0!				#DIV/0!				#DIV/0!				#DIV/0!				#DIV/0!				#DIV/0!				#DIV/0!				#DIV/0!				#DIV/0!
		0	0	#DIV/0!	0	0	#DIV/0!		0	0	#DIV/0!				#DIV/0!				#DIV/0!				#DIV/0!				#DIV/0!				#DIV/0!				#DIV/0!				#DIV/0!				#DIV/0!				#DIV/0!
		0	0	#DIV/0!	0	0	#DIV/0!		0	0	#DIV/0!				#DIV/0!				#DIV/0!				#DIV/0!				#DIV/0!				#DIV/0!				#DIV/0!				#DIV/0!				#DIV/0!				#DIV/0!
		0	0	#DIV/0!	0	0	#DIV/0!		0	0	#DIV/0!				#DIV/0!				#DIV/0!				#DIV/0!				#DIV/0!				#DIV/0!				#DIV/0!				#DIV/0!				#DIV/0!				#DIV/0!
		0	0	#DIV/0!	0	0	#DIV/0!		0	0	#DIV/0!				#DIV/0!				#DIV/0!				#DIV/0!				#DIV/0!				#DIV/0!				#DIV/0!				#DIV/0!				#DIV/0!				#DIV/0!
		0	0	#DIV/0!	0	0	#DIV/0!		0	0	#DIV/0!				#DIV/0!				#DIV/0!				#DIV/0!				#DIV/0!				#DIV/0!				#DIV/0!				#DIV/0!				#DIV/0!				#DIV/0!
		0	0	#DIV/0!	0	0	#DIV/0!		0	0	#DIV/0!				#DIV/0!				#DIV/0!				#DIV/0!				#DIV/0!				#DIV/0!				#DIV/0!				#DIV/0!				#DIV/0!				#DIV/0!
		0	0	#DIV/0!	0	0	#DIV/0!		0	0	#DIV/0!				#DIV/0!				#DIV/0!				#DIV/0!				#DIV/0!				#DIV/0!				#DIV/0!				#DIV/0!				#DIV/0!				#DIV/0!
		0	0	#DIV/0!	0	0	#DIV/0!		0	0	#DIV/0!				#DIV/0!				#DIV/0!				#DIV/0!				#DIV/0!				#DIV/0!				#DIV/0!				#DIV/0!				#DIV/0!				#DIV/0!
		0	0	#DIV/0!	0	0	#DIV/0!		0	0	#DIV/0!				#DIV/0!				#DIV/0!				#DIV/0!				#DIV/0!				#DIV/0!				#DIV/0!				#DIV/0!				#DIV/0!				#DIV/0!
		0	0	#DIV/0!	0	0	#DIV/0!		0	0	#DIV/0!				#DIV/0!				#DIV/0!				#DIV/0!				#DIV/0!				#DIV/0!				#DIV/0!				#DIV/0!				#DIV/0!				#DIV/0!
		0	0	#DIV/0!	0	0	#DIV/0!		0	0	#DIV/0!				#DIV/0!				#DIV/0!				#DIV/0!				#DIV/0!				#DIV/0!				#DIV/0!				#DIV/0!				#DIV/0!				#DIV/0!
		0	0	#DIV/0!	0	0	#DIV/0!		0	0	#DIV/0!				#DIV/0!				#DIV/0!				#DIV/0!				#DIV/0!				#DIV/0!				#DIV/0!				#DIV/0!				#DIV/0!				#DIV/0!
		0	0	#DIV/0!	0	0	#DIV/0!		0	0	#DIV/0!				#DIV/0!				#DIV/0!				#DIV/0!				#DIV/0!				#DIV/0!				#DIV/0!				#DIV/0!				#DIV/0!				#DIV/0!
		0	0	#DIV/0!	0	0	#DIV/0!		0	0	#DIV/0!				#DIV/0!				#DIV/0!				#DIV/0!				#DIV/0!				#DIV/0!				#DIV/0!				#DIV/0!				#DIV/0!				#DIV/0!
		0	0	#DIV/0!	0	0	#DIV/0!		0	0	#DIV/0!				#DIV/0!				#DIV/0!				#DIV/0!				#DIV/0!				#DIV/0!				#DIV/0!				#DIV/0!				#DIV/0!				#DIV/0!
		0	0	#DIV/0!	0	0	#DIV/0!		0	0	#DIV/0!				#DIV/0!				#DIV/0!				#DIV/0!				#DIV/0!				#DIV/0!				#DIV/0!				#DIV/0!				#DIV/0!				#DIV/0!
		0	0	#DIV/0!	0	0	#DIV/0!		0	0	#DIV/0!				#DIV/0!				#DIV/0!				#DIV/0!				#DIV/0!				#DIV/0!				#DIV/0!				#DIV/0!				#DIV/0!				#DIV/0!
		0	0	#DIV/0!	0	0	#DIV/0!		0	0	#DIV/0!				#DIV/0!				#DIV/0!				#DIV/0!				#DIV/0!				#DIV/0!				#DIV/0!				#DIV/0!				#DIV/0!				#DIV/0!
		0	0	#DIV/0!	0	0	#DIV/0!		0	0	#DIV/0!				#DIV/0!				#DIV/0!				#DIV/0!				#DIV/0!				#DIV/0!				#DIV/0!				#DIV/0!				#DIV/0!				#DIV/0!
		0	0	#DIV/0!	0	0	#DIV/0!		0	0	#DIV/0!				#DIV/0!				#DIV/0!				#DIV/0!				#DIV/0!				#DIV/0!				#DIV/0!				#DIV/0!				#DIV/0!				#DIV/0!
		0	0	#DIV/0!	0	0	#DIV/0!		0	0	#DIV/0!				#DIV/0!				#DIV/0!				#DIV/0!				#DIV/0!				#DIV/0!				#DIV/0!				#DIV/0!				#DIV/0!				#DIV/0!
		0	0	#DIV/0!	0	0	#DIV/0!		0	0	#DIV/0!				#DIV/0!				#DIV/0!				#DIV/0!				#DIV/0!				#DIV/0!				#DIV/0!				#DIV/0!				#DIV/0!				#DIV/0!
		0	0	#DIV/0!	0	0	#DIV/0!		0	0	#DIV/0!				#DIV/0!				#DIV/0!				#DIV/0!				#DIV/0!				#DIV/0!				#DIV/0!				#DIV/0!				#DIV/0!				#DIV/0!
		0	0	#DIV/0!	0	0	#DIV/0!		0	0	#DIV/0!				#DIV/0!				#DIV/0!				#DIV/0!				#DIV/0!				#DIV/0!				#DIV/0!				#DIV/0!				#DIV/0!				#DIV/0!
		0	0	#DIV/0!	0	0	#DIV/0!		0	0	#DIV/0!				#DIV/0!				#DIV/0!				#DIV/0!				#DIV/0!				#DIV/0!				#DIV/0!				#DIV/0!				#DIV/0!				#DIV/0!
		0	0	#DIV/0!	0	0	#DIV/0!		0	0	#DIV/0!				#DIV/0!				#DIV/0!				#DIV/0!				#DIV/0!				#DIV/0!				#DIV/0!				#DIV/0!				#DIV/0!				#DIV/0!
		0	0	#DIV/0!	0	0	#DIV/0!		0	0	#DIV/0!				#DIV/0!				#DIV/0!				#DIV/0!				#DIV/0!				#DIV/0!				#DIV/0!				#DIV/0!				#DIV/0!				#DIV/0!
		0	0	#DIV/0!	0	0	#DIV/0!		0	0	#DIV/0!				#DIV/0!				#DIV/0!				#DIV/0!				#DIV/0!				#DIV/0!				#DIV/0!				#DIV/0!				#DIV/0!				#DIV/0!
		0	0	#DIV/0!	0	0	#DIV/0!		0	0	#DIV/0!				#DIV/0!				#DIV/0!				#DIV/0!				#DIV/0!				#DIV/0!				#DIV/0!				#DIV/0!				#DIV/0!				#DIV/0!
		0	0	#DIV/0!	0	0	#DIV/0!		0	0	#DIV/0!				#DIV/0!				#DIV/0!				#DIV/0!				#DIV/0!				#DIV/0!				#DIV/0!				#DIV/0!				#DIV/0!				#DIV/0!
		0	0	#DIV/0!	0	0	#DIV/0!		0	0	#DIV/0!				#DIV/0!				#DIV/0!				#DIV/0!				#DIV/0!				#DIV/0!				#DIV/0!				#DIV/0!				#DIV/0!				#DIV/0!
		0	0	#DIV/0!	0	0	#DIV/0!		0	0	#DIV/0!				#DIV/0!				#DIV/0!				#DIV/0!				#DIV/0!				#DIV/0!				#DIV/0!				#DIV/0!				#DIV/0!				#DIV/0!
		0	0	#DIV/0!	0	0	#DIV/0!		0	0	#DIV/0!				#DIV/0!				#DIV/0!				#DIV/0!				#DIV/0!				#DIV/0!				#DIV/0!				#DIV/0!				#DIV/0!				#DIV/0!
		0	0	#DIV/0!	0	0	#DIV/0!		0	0	#DIV/0!				#DIV/0!				#DIV/0!				#DIV/0!				#DIV/0!				#DIV/0!				#DIV/0!				#DIV/0!				#DIV/0!				#DIV/0!
		0	0	#DIV/0!	0	0	#DIV/0!		0	0	#DIV/0!				#DIV/0!				#DIV/0!				#DIV/0!				#DIV/0!				#DIV/0!				#DIV/0!				#DIV/0!				#DIV/0!				#DIV/0!
		0	0	#DIV/0!	0	0	#DIV/0!		0	0	#DIV/0!				#DIV/0!				#DIV/0!				#DIV/0!				#DIV/0!				#DIV/0!				#DIV/0!				#DIV/0!				#DIV/0!				#DIV/0!
		0	0	#DIV/0!	0	0	#DIV/0!		0	0	#DIV/0!				#DIV/0!				#DIV/0!				#DIV/0!				#DIV/0!				#DIV/0!				#DIV/0!				#DIV/0!				#DIV/0!				#DIV/0!
		0	0	#DIV/0!	0	0	#DIV/0!		0	0	#DIV/0!				#DIV/0!				#DIV/0!				#DIV/0!				#DIV/0!				#DIV/0!				#DIV/0!				#DIV/0!				#DIV/0!				#DIV/0!
		0	0	#DIV/0!	0	0	#DIV/0!		0	0	#DIV/0!				#DIV/0!				#DIV/0!				#DIV/0!				#DIV/0!				#DIV/0!				#DIV/0!				#DIV/0!				#DIV/0!				#DIV/0!
		0	0	#DIV/0!	0	0	#DIV/0!		0	0	#DIV/0!				#DIV/0!				#DIV/0!				#DIV/0!				#DIV/0!				#DIV/0!				#DIV/0!				#DIV/0!				#DIV/0!				#DIV/0!
		0	0	#DIV/0!	0	0	#DIV/0!		0	0	#DIV/0!				#DIV/0!				#DIV/0!				#DIV/0!				#DIV/0!				#DIV/0!				#DIV/0!				#DIV/0!				#DIV/0!				#DIV/0!
		0	0	#DIV/0!	0	0	#DIV/0!		0	0	#DIV/0!				#DIV/0!				#DIV/0!				#DIV/0!				#DIV/0!				#DIV/0!				#DIV/0!				#DIV/0!				#DIV/0!				#DIV/0!
		0	0	#DIV/0!	0	0	#DIV/0!		0	0	#DIV/0!				#DIV/0!				#DIV/0!				#DIV/0!				#DIV/0!				#DIV/0!				#DIV/0!				#DIV/0!				#DIV/0!				#DIV/0!
		0	0	#DIV/0!	0	0	#DIV/0!		0	0	#DIV/0!				#DIV/0!				#DIV/0!				#DIV/0!				#DIV/0!				#DIV/0!				#DIV/0!				#DIV/0!				#DIV/0!				#DIV/0!
		0	0	#DIV/0!	0	0	#DIV/0!		0	0	#DIV/0!				#DIV/0!				#DIV/0!				#DIV/0!				#DIV/0!				#DIV/0!				#DIV/0!				#DIV/0!				#DIV/0!				#DIV/0!
		0	0	#DIV/0!	0	0	#DIV/0!		0	0	#DIV/0!				#DIV/0!				#DIV/0!				#DIV/0!				#DIV/0!				#DIV/0!				#DIV/0!				#DIV/0!				#DIV/0!				#DIV/0!
		0	0	#DIV/0!	0	0	#DIV/0!		0	0	#DIV/0!				#DIV/0!				#DIV/0!				#DIV/0!				#DIV/0!				#DIV/0!				#DIV/0!				#DIV/0!				#DIV/0!				#DIV/0!
		0	0	#DIV/0!	0	0	#DIV/0!		0	0	#DIV/0!				#DIV/0!				#DIV/0!				#DIV/0!				#DIV/0!				#DIV/0!				#DIV/0!				#DIV/0!				#DIV/0!				#DIV/0!
		0	0	#DIV/0!	0	0	#DIV/0!		0	0	#DIV/0!				#DIV/0!				#DIV/0!				#DIV/0!				#DIV/0!				#DIV/0!				#DIV/0!				#DIV/0!				#DIV/0!				#DIV/0!
		0	0	#DIV/0!	0	0	#DIV/0!		0	0	#DIV/0!				#DIV/0!				#DIV/0!				#DIV/0!				#DIV/0!				#DIV/0!				#DIV/0!				#DIV/0!				#DIV/0!				#DIV/0!
		0	0	#DIV/0!	0	0	#DIV/0!		0	0	#DIV/0!				#DIV/0!				#DIV/0!				#DIV/0!				#DIV/0!				#DIV/0!				#DIV/0!				#DIV/0!				#DIV/0!				#DIV/0!
		0	0	#DIV/0!	0	0	#DIV/0!		0	0	#DIV/0!				#DIV/0!				#DIV/0!				#DIV/0!				#DIV/0!				#DIV/0!				#DIV/0!				#DIV/0!				#DIV/0!				#DIV/0!
		0	0	#DIV/0!	0	0	#DIV/0!		0	0	#DIV/0!				#DIV/0!				#DIV/0!				#DIV/0!				#DIV/0!				#DIV/0!				#DIV/0!				#DIV/0!				#DIV/0!				#DIV/0!
		0	0	#DIV/0!	0	0	#DIV/0!		0	0	#DIV/0!				#DIV/0!				#DIV/0!				#DIV/0!				#DIV/0!				#DIV/0!				#DIV/0!				#DIV/0!				#DIV/0!				#DIV/0!
		0	0	#DIV/0!	0	0	#DIV/0!		0	0	#DIV/0!				#DIV/0!				#DIV/0!				#DIV/0!				#DIV/0!				#DIV/0!				#DIV/0!				#DIV/0!				#DIV/0!				#DIV/0!
		0	0	#DIV/0!	0	0	#DIV/0!		0	0	#DIV/0!				#DIV/0!				#DIV/0!				#DIV/0!				#DIV/0!				#DIV/0!				#DIV/0!				#DIV/0!				#DIV/0!				#DIV/0!
		0	0	#DIV/0!	0	0	#DIV/0!		0	0	#DIV/0!				#DIV/0!				#DIV/0!				#DIV/0!				#DIV/0!				#DIV/0!				#DIV/0!				#DIV/0!				#DIV/0!				#DIV/0!
		0	0	#DIV/0!	0	0	#DIV/0!		0	0	#DIV/0!				#DIV/0!				#DIV/0!				#DIV/0!				#DIV/0!				#DIV/0!				#DIV/0!				#DIV/0!				#DIV/0!				#DIV/0!
		0	0	#DIV/0!	0	0	#DIV/0!		0	0	#DIV/0!				#DIV/0!				#DIV/0!				#DIV/0!				#DIV/0!				#DIV/0!				#DIV/0!				#DIV/0!				#DIV/0!				#DIV/0!
		0	0	#DIV/0!	0	0	#DIV/0!		0	0	#DIV/0!				#DIV/0!				#DIV/0!				#DIV/0!				#DIV/0!				#DIV/0!				#DIV/0!				#DIV/0!				#DIV/0!				#DIV/0!
		0	0	#DIV/0!	0	0	#DIV/0!		0	0	#DIV/0!				#DIV/0!				#DIV/0!				#DIV/0!				#DIV/0!				#DIV/0!				#DIV/0!				#DIV/0!				#DIV/0!				#DIV/0!
		0	0	#DIV/0!	0	0	#DIV/0!		0	0	#DIV/0!				#DIV/0!				#DIV/0!				#DIV/0!				#DIV/0!				#DIV/0!				#DIV/0!				#DIV/0!				#DIV/0!				#DIV/0!
		0	0	#DIV/0!	0	0	#DIV/0!		0	0	#DIV/0!				#DIV/0!				#DIV/0!				#DIV/0!				#DIV/0!				#DIV/0!				#DIV/0!				#DIV/0!				#DIV/0!				#DIV/0!
		0	0	#DIV/0!	0	0	#DIV/0!		0	0	#DIV/0!				#DIV/0!				#DIV/0!				#DIV/0!				#DIV/0!				#DIV/0!				#DIV/0!				#DIV/0!				#DIV/0!				#DIV/0!
		0	0	#DIV/0!	0	0	#DIV/0!		0	0	#DIV/0!				#DIV/0!				#DIV/0!				#DIV/0!				#DIV/0!				#DIV/0!				#DIV/0!				#DIV/0!				#DIV/0!				#DIV/0!
		0	0	#DIV/0!	0	0	#DIV/0!		0	0	#DIV/0!				#DIV/0!				#DIV/0!				#DIV/0!				#DIV/0!				#DIV/0!				#DIV/0!				#DIV/0!				#DIV/0!				#DIV/0!
		0	0	#DIV/0!	0	0	#DIV/0!		0	0	#DIV/0!				#DIV/0!				#DIV/0!				#DIV/0!				#DIV/0!				#DIV/0!				#DIV/0!				#DIV/0!				#DIV/0!				#DIV/0!
		0	0	#DIV/0!	0	0	#DIV/0!		0	0	#DIV/0!				#DIV/0!				#DIV/0!				#DIV/0!				#DIV/0!				#DIV/0!				#DIV/0!				#DIV/0!				#DIV/0!				#DIV/0!
		0	0	#DIV/0!	0	0	#DIV/0!		0	0	#DIV/0!				#DIV/0!				#DIV/0!				#DIV/0!				#DIV/0!				#DIV/0!				#DIV/0!				#DIV/0!				#DIV/0!				#DIV/0!
		0	0	#DIV/0!	0	0	#DIV/0!		0	0	#DIV/0!				#DIV/0!				#DIV/0!				#DIV/0!				#DIV/0!				#DIV/0!				#DIV/0!				#DIV/0!				#DIV/0!				#DIV/0!
		0	0	#DIV/0!	0	0	#DIV/0!		0	0	#DIV/0!				#DIV/0!				#DIV/0!				#DIV/0!				#DIV/0!				#DIV/0!				#DIV/0!				#DIV/0!				#DIV/0!				#DIV/0!
		0	0	#DIV/0!	0	0	#DIV/0!		0	0	#DIV/0!				#DIV/0!				#DIV/0!				#DIV/0!				#DIV/0!				#DIV/0!				#DIV/0!				#DIV/0!				#DIV/0!				#DIV/0!
		0	0	#DIV/0!	0	0	#DIV/0!		0	0	#DIV/0!				#DIV/0!				#DIV/0!				#DIV/0!				#DIV/0!				#DIV/0!				#DIV/0!				#DIV/0!				#DIV/0!				#DIV/0!
		0	0	#DIV/0!	0	0	#DIV/0!		0	0	#DIV/0!				#DIV/0!				#DIV/0!				#DIV/0!				#DIV/0!				#DIV/0!				#DIV/0!				#DIV/0!				#DIV/0!				#DIV/0!
		0	0	#DIV/0!	0	0	#DIV/0!		0	0	#DIV/0!				#DIV/0!				#DIV/0!				#DIV/0!				#DIV/0!				#DIV/0!				#DIV/0!				#DIV/0!				#DIV/0!				#DIV/0!
		0	0	#DIV/0!	0	0	#DIV/0!		0	0	#DIV/0!				#DIV/0!				#DIV/0!				#DIV/0!				#DIV/0!				#DIV/0!				#DIV/0!				#DIV/0!				#DIV/0!				#DIV/0!
		0	0	#DIV/0!	0	0	#DIV/0!		0	0	#DIV/0!				#DIV/0!				#DIV/0!				#DIV/0!				#DIV/0!				#DIV/0!				#DIV/0!				#DIV/0!				#DIV/0!				#DIV/0!
		0	0	#DIV/0!	0	0	#DIV/0!		0	0	#DIV/0!				#DIV/0!				#DIV/0!				#DIV/0!				#DIV/0!				#DIV/0!				#DIV/0!				#DIV/0!				#DIV/0!				#DIV/0!
		0	0	#DIV/0!	0	0	#DIV/0!		0	0	#DIV/0!				#DIV/0!				#DIV/0!				#DIV/0!				#DIV/0!				#DIV/0!				#DIV/0!				#DIV/0!				#DIV/0!				#DIV/0!
		0	0	#DIV/0!	0	0	#DIV/0!		0	0	#DIV/0!				#DIV/0!				#DIV/0!				#DIV/0!				#DIV/0!				#DIV/0!				#DIV/0!				#DIV/0!				#DIV/0!				#DIV/0!
		0	0	#DIV/0!	0	0	#DIV/0!		0	0	#DIV/0!				#DIV/0!				#DIV/0!				#DIV/0!				#DIV/0!				#DIV/0!				#DIV/0!				#DIV/0!				#DIV/0!				#DIV/0!
		0	0	#DIV/0!	0	0	#DIV/0!		0	0	#DIV/0!				#DIV/0!				#DIV/0!				#DIV/0!				#DIV/0!				#DIV/0!				#DIV/0!				#DIV/0!				#DIV/0!				#DIV/0!
		0	0	#DIV/0!	0	0	#DIV/0!		0	0	#DIV/0!				#DIV/0!				#DIV/0!				#DIV/0!				#DIV/0!				#DIV/0!				#DIV/0!				#DIV/0!				#DIV/0!				#DIV/0!
		0	0	#DIV/0!	0	0	#DIV/0!		0	0	#DIV/0!				#DIV/0!				#DIV/0!				#DIV/0!				#DIV/0!				#DIV/0!				#DIV/0!				#DIV/0!				#DIV/0!				#DIV/0!
		0	0	#DIV/0!	0	0	#DIV/0!		0	0	#DIV/0!				#DIV/0!				#DIV/0!				#DIV/0!				#DIV/0!				#DIV/0!				#DIV/0!				#DIV/0!				#DIV/0!				#DIV/0!
		0	0	#DIV/0!	0	0	#DIV/0!		0	0	#DIV/0!				#DIV/0!				#DIV/0!				#DIV/0!				#DIV/0!				#DIV/0!				#DIV/0!				#DIV/0!				#DIV/0!				#DIV/0!
		0	0	#DIV/0!	0	0	#DIV/0!		0	0	#DIV/0!				#DIV/0!				#DIV/0!				#DIV/0!				#DIV/0!				#DIV/0!				#DIV/0!				#DIV/0!				#DIV/0!				#DIV/0!
		0	0	#DIV/0!	0	0	#DIV/0!		0	0	#DIV/0!				#DIV/0!				#DIV/0!				#DIV/0!				#DIV/0!				#DIV/0!				#DIV/0!				#DIV/0!				#DIV/0!				#DIV/0!
		0	0	#DIV/0!	0	0	#DIV/0!		0	0	#DIV/0!				#DIV/0!				#DIV/0!				#DIV/0!				#DIV/0!				#DIV/0!				#DIV/0!				#DIV/0!				#DIV/0!				#DIV/0!
		0	0	#DIV/0!	0	0	#DIV/0!		0	0	#DIV/0!				#DIV/0!				#DIV/0!				#DIV/0!				#DIV/0!				#DIV/0!				#DIV/0!				#DIV/0!				#DIV/0!				#DIV/0!
		0	0	#DIV/0!	0	0	#DIV/0!		0	0	#DIV/0!				#DIV/0!				#DIV/0!				#DIV/0!				#DIV/0!				#DIV/0!				#DIV/0!				#DIV/0!				#DIV/0!				#DIV/0!
		0	0	#DIV/0!	0	0	#DIV/0!		0	0	#DIV/0!				#DIV/0!				#DIV/0!				#DIV/0!				#DIV/0!				#DIV/0!				#DIV/0!				#DIV/0!				#DIV/0!				#DIV/0!
		0	0	#DIV/0!	0	0	#DIV/0!		0	0	#DIV/0!				#DIV/0!				#DIV/0!				#DIV/0!				#DIV/0!				#DIV/0!				#DIV/0!				#DIV/0!				#DIV/0!				#DIV/0!
		0	0	#DIV/0!	0	0	#DIV/0!		0	0	#DIV/0!				#DIV/0!				#DIV/0!				#DIV/0!				#DIV/0!				#DIV/0!				#DIV/0!				#DIV/0!				#DIV/0!				#DIV/0!
		0	0	#DIV/0!	0	0	#DIV/0!		0	0	#DIV/0!				#DIV/0!				#DIV/0!				#DIV/0!				#DIV/0!				#DIV/0!				#DIV/0!				#DIV/0!				#DIV/0!				#DIV/0!
		0	0	#DIV/0!	0	0	#DIV/0!		0	0	#DIV/0!				#DIV/0!				#DIV/0!				#DIV/0!				#DIV/0!				#DIV/0!				#DIV/0!				#DIV/0!				#DIV/0!				#DIV/0!
		0	0	#DIV/0!	0	0	#DIV/0!		0	0	#DIV/0!				#DIV/0!				#DIV/0!				#DIV/0!				#DIV/0!				#DIV/0!				#DIV/0!				#DIV/0!				#DIV/0!				#DIV/0!
		0	0	#DIV/0!	0	0	#DIV/0!		0	0	#DIV/0!				#DIV/0!				#DIV/0!				#DIV/0!				#DIV/0!				#DIV/0!				#DIV/0!				#DIV/0!				#DIV/0!				#DIV/0!
		0	0	#DIV/0!	0	0	#DIV/0!		0	0	#DIV/0!				#DIV/0!				#DIV/0!				#DIV/0!				#DIV/0!				#DIV/0!				#DIV/0!				#DIV/0!				#DIV/0!				#DIV/0!
		0	0	#DIV/0!	0	0	#DIV/0!		0	0	#DIV/0!				#DIV/0!				#DIV/0!				#DIV/0!				#DIV/0!				#DIV/0!				#DIV/0!				#DIV/0!				#DIV/0!				#DIV/0!
		0	0	#DIV/0!	0	0	#DIV/0!		0	0	#DIV/0!				#DIV/0!				#DIV/0!				#DIV/0!				#DIV/0!				#DIV/0!				#DIV/0!				#DIV/0!				#DIV/0!				#DIV/0!
		0	0	#DIV/0!	0	0	#DIV/0!		0	0	#DIV/0!				#DIV/0!				#DIV/0!				#DIV/0!				#DIV/0!				#DIV/0!				#DIV/0!				#DIV/0!				#DIV/0!				#DIV/0!
		0	0	#DIV/0!	0	0	#DIV/0!		0	0	#DIV/0!				#DIV/0!				#DIV/0!				#DIV/0!				#DIV/0!				#DIV/0!				#DIV/0!				#DIV/0!				#DIV/0!				#DIV/0!
		0	0	#DIV/0!	0	0	#DIV/0!		0	0	#DIV/0!				#DIV/0!				#DIV/0!				#DIV/0!				#DIV/0!				#DIV/0!				#DIV/0!				#DIV/0!				#DIV/0!				#DIV/0!
		0	0	#DIV/0!	0	0	#DIV/0!		0	0	#DIV/0!				#DIV/0!				#DIV/0!				#DIV/0!				#DIV/0!				#DIV/0!				#DIV/0!				#DIV/0!				#DIV/0!				#DIV/0!
		0	0	#DIV/0!	0	0	#DIV/0!		0	0	#DIV/0!				#DIV/0!				#DIV/0!				#DIV/0!				#DIV/0!				#DIV/0!				#DIV/0!				#DIV/0!				#DIV/0!				#DIV/0!
		0	0	#DIV/0!	0	0	#DIV/0!		0	0	#DIV/0!				#DIV/0!				#DIV/0!				#DIV/0!				#DIV/0!				#DIV/0!				#DIV/0!				#DIV/0!				#DIV/0!				#DIV/0!
		0	0	#DIV/0!	0	0	#DIV/0!		0	0	#DIV/0!				#DIV/0!				#DIV/0!				#DIV/0!				#DIV/0!				#DIV/0!				#DIV/0!				#DIV/0!				#DIV/0!				#DIV/0!
		0	0	#DIV/0!	0	0	#DIV/0!		0	0	#DIV/0!				#DIV/0!				#DIV/0!				#DIV/0!				#DIV/0!				#DIV/0!				#DIV/0!				#DIV/0!				#DIV/0!				#DIV/0!
		0	0	#DIV/0!	0	0	#DIV/0!		0	0	#DIV/0!				#DIV/0!				#DIV/0!				#DIV/0!				#DIV/0!				#DIV/0!				#DIV/0!				#DIV/0!				#DIV/0!				#DIV/0!
		0	0	#DIV/0!	0	0	#DIV/0!		0	0	#DIV/0!				#DIV/0!				#DIV/0!				#DIV/0!				#DIV/0!				#DIV/0!				#DIV/0!				#DIV/0!				#DIV/0!				#DIV/0!
		0	0	#DIV/0!	0	0	#DIV/0!		0	0	#DIV/0!				#DIV/0!				#DIV/0!				#DIV/0!				#DIV/0!				#DIV/0!				#DIV/0!				#DIV/0!				#DIV/0!				#DIV/0!
		0	0	#DIV/0!	0	0	#DIV/0!		0	0	#DIV/0!				#DIV/0!				#DIV/0!				#DIV/0!				#DIV/0!				#DIV/0!				#DIV/0!				#DIV/0!				#DIV/0!				#DIV/0!
		0	0	#DIV/0!	0	0	#DIV/0!		0	0	#DIV/0!				#DIV/0!				#DIV/0!				#DIV/0!				#DIV/0!				#DIV/0!				#DIV/0!				#DIV/0!				#DIV/0!				#DIV/0!
		0	0	#DIV/0!	0	0	#DIV/0!		0	0	#DIV/0!				#DIV/0!				#DIV/0!				#DIV/0!				#DIV/0!				#DIV/0!				#DIV/0!				#DIV/0!				#DIV/0!				#DIV/0!
		0	0	#DIV/0!	0	0	#DIV/0!		0	0	#DIV/0!				#DIV/0!				#DIV/0!				#DIV/0!				#DIV/0!				#DIV/0!				#DIV/0!				#DIV/0!				#DIV/0!				#DIV/0!
		0	0	#DIV/0!	0	0	#DIV/0!		0	0	#DIV/0!				#DIV/0!				#DIV/0!				#DIV/0!				#DIV/0!				#DIV/0!				#DIV/0!				#DIV/0!				#DIV/0!				#DIV/0!
		0	0	#DIV/0!	0	0	#DIV/0!		0	0	#DIV/0!				#DIV/0!				#DIV/0!				#DIV/0!				#DIV/0!				#DIV/0!				#DIV/0!				#DIV/0!				#DIV/0!				#DIV/0!
		0	0	#DIV/0!	0	0	#DIV/0!		0	0	#DIV/0!				#DIV/0!				#DIV/0!				#DIV/0!				#DIV/0!				#DIV/0!				#DIV/0!				#DIV/0!				#DIV/0!				#DIV/0!
		0	0	#DIV/0!	0	0	#DIV/0!		0	0	#DIV/0!				#DIV/0!				#DIV/0!				#DIV/0!				#DIV/0!				#DIV/0!				#DIV/0!				#DIV/0!				#DIV/0!				#DIV/0!
		0	0	#DIV/0!	0	0	#DIV/0!		0	0	#DIV/0!				#DIV/0!				#DIV/0!				#DIV/0!				#DIV/0!				#DIV/0!				#DIV/0!				#DIV/0!				#DIV/0!				#DIV/0!
		0	0	#DIV/0!	0	0	#DIV/0!		0	0	#DIV/0!				#DIV/0!				#DIV/0!				#DIV/0!				#DIV/0!				#DIV/0!				#DIV/0!				#DIV/0!				#DIV/0!				#DIV/0!
		0	0	#DIV/0!	0	0	#DIV/0!		0	0	#DIV/0!				#DIV/0!				#DIV/0!				#DIV/0!				#DIV/0!				#DIV/0!				#DIV/0!				#DIV/0!				#DIV/0!				#DIV/0!
		0	0	#DIV/0!	0	0	#DIV/0!		0	0	#DIV/0!				#DIV/0!				#DIV/0!				#DIV/0!				#DIV/0!				#DIV/0!				#DIV/0!				#DIV/0!				#DIV/0!				#DIV/0!
		0	0	#DIV/0!	0	0	#DIV/0!		0	0	#DIV/0!				#DIV/0!				#DIV/0!				#DIV/0!				#DIV/0!				#DIV/0!				#DIV/0!				#DIV/0!				#DIV/0!				#DIV/0!
		0	0	#DIV/0!	0	0	#DIV/0!		0	0	#DIV/0!				#DIV/0!				#DIV/0!				#DIV/0!				#DIV/0!				#DIV/0!				#DIV/0!				#DIV/0!				#DIV/0!				#DIV/0!
		0	0	#DIV/0!	0	0	#DIV/0!		0	0	#DIV/0!				#DIV/0!				#DIV/0!				#DIV/0!				#DIV/0!				#DIV/0!				#DIV/0!				#DIV/0!				#DIV/0!				#DIV/0!
		0	0	#DIV/0!	0	0	#DIV/0!		0	0	#DIV/0!				#DIV/0!				#DIV/0!				#DIV/0!				#DIV/0!				#DIV/0!				#DIV/0!				#DIV/0!				#DIV/0!				#DIV/0!
		0	0	#DIV/0!	0	0	#DIV/0!		0	0	#DIV/0!				#DIV/0!				#DIV/0!				#DIV/0!				#DIV/0!				#DIV/0!				#DIV/0!				#DIV/0!				#DIV/0!				#DIV/0!
		0	0	#DIV/0!	0	0	#DIV/0!		0	0	#DIV/0!				#DIV/0!				#DIV/0!				#DIV/0!				#DIV/0!				#DIV/0!				#DIV/0!				#DIV/0!				#DIV/0!				#DIV/0!
		0	0	#DIV/0!	0	0	#DIV/0!		0	0	#DIV/0!				#DIV/0!				#DIV/0!				#DIV/0!				#DIV/0!				#DIV/0!				#DIV/0!				#DIV/0!				#DIV/0!				#DIV/0!
		0	0	#DIV/0!	0	0	#DIV/0!		0	0	#DIV/0!				#DIV/0!				#DIV/0!				#DIV/0!				#DIV/0!				#DIV/0!				#DIV/0!				#DIV/0!				#DIV/0!				#DIV/0!
		0	0	#DIV/0!	0	0	#DIV/0!		0	0	#DIV/0!				#DIV/0!				#DIV/0!				#DIV/0!				#DIV/0!				#DIV/0!				#DIV/0!				#DIV/0!				#DIV/0!				#DIV/0!
		0	0	#DIV/0!	0	0	#DIV/0!		0	0	#DIV/0!				#DIV/0!				#DIV/0!				#DIV/0!				#DIV/0!				#DIV/0!				#DIV/0!				#DIV/0!				#DIV/0!				#DIV/0!
		0	0	#DIV/0!	0	0	#DIV/0!		0	0	#DIV/0!				#DIV/0!				#DIV/0!				#DIV/0!				#DIV/0!				#DIV/0!				#DIV/0!				#DIV/0!				#DIV/0!				#DIV/0!
		0	0	#DIV/0!	0	0	#DIV/0!		0	0	#DIV/0!				#DIV/0!				#DIV/0!				#DIV/0!				#DIV/0!				#DIV/0!				#DIV/0!				#DIV/0!				#DIV/0!				#DIV/0!
		0	0	#DIV/0!	0	0	#DIV/0!		0	0	#DIV/0!				#DIV/0!				#DIV/0!				#DIV/0!				#DIV/0!				#DIV/0!				#DIV/0!				#DIV/0!				#DIV/0!				#DIV/0!
		0	0	#DIV/0!	0	0	#DIV/0!		0	0	#DIV/0!				#DIV/0!				#DIV/0!				#DIV/0!				#DIV/0!				#DIV/0!				#DIV/0!				#DIV/0!				#DIV/0!				#DIV/0!
		0	0	#DIV/0!	0	0	#DIV/0!		0	0	#DIV/0!				#DIV/0!				#DIV/0!				#DIV/0!				#DIV/0!				#DIV/0!				#DIV/0!				#DIV/0!				#DIV/0!				#DIV/0!
		0	0	#DIV/0!	0	0	#DIV/0!		0	0	#DIV/0!				#DIV/0!				#DIV/0!				#DIV/0!				#DIV/0!				#DIV/0!				#DIV/0!				#DIV/0!				#DIV/0!				#DIV/0!
		0	0	#DIV/0!	0	0	#DIV/0!		0	0	#DIV/0!				#DIV/0!				#DIV/0!				#DIV/0!				#DIV/0!				#DIV/0!				#DIV/0!				#DIV/0!				#DIV/0!				#DIV/0!
		0	0	#DIV/0!	0	0	#DIV/0!		0	0	#DIV/0!				#DIV/0!				#DIV/0!				#DIV/0!				#DIV/0!				#DIV/0!				#DIV/0!				#DIV/0!				#DIV/0!				#DIV/0!
		0	0	#DIV/0!	0	0	#DIV/0!		0	0	#DIV/0!				#DIV/0!				#DIV/0!				#DIV/0!				#DIV/0!				#DIV/0!				#DIV/0!				#DIV/0!				#DIV/0!				#DIV/0!
		0	0	#DIV/0!	0	0	#DIV/0!		0	0	#DIV/0!				#DIV/0!				#DIV/0!				#DIV/0!				#DIV/0!				#DIV/0!				#DIV/0!				#DIV/0!				#DIV/0!				#DIV/0!
		0	0	#DIV/0!	0	0	#DIV/0!		0	0	#DIV/0!				#DIV/0!				#DIV/0!				#DIV/0!				#DIV/0!				#DIV/0!				#DIV/0!				#DIV/0!				#DIV/0!				#DIV/0!
		0	0	#DIV/0!	0	0	#DIV/0!		0	0	#DIV/0!				#DIV/0!				#DIV/0!				#DIV/0!				#DIV/0!				#DIV/0!				#DIV/0!				#DIV/0!				#DIV/0!				#DIV/0!
		0	0	#DIV/0!	0	0	#DIV/0!		0	0	#DIV/0!				#DIV/0!				#DIV/0!				#DIV/0!				#DIV/0!				#DIV/0!				#DIV/0!				#DIV/0!				#DIV/0!				#DIV/0!
		0	0	#DIV/0!	0	0	#DIV/0!		0	0	#DIV/0!				#DIV/0!				#DIV/0!				#DIV/0!				#DIV/0!				#DIV/0!				#DIV/0!				#DIV/0!				#DIV/0!				#DIV/0!
		0	0	#DIV/0!	0	0	#DIV/0!		0	0	#DIV/0!				#DIV/0!				#DIV/0!				#DIV/0!				#DIV/0!				#DIV/0!				#DIV/0!				#DIV/0!				#DIV/0!				#DIV/0!
		0	0	#DIV/0!	0	0	#DIV/0!		0	0	#DIV/0!				#DIV/0!				#DIV/0!				#DIV/0!				#DIV/0!				#DIV/0!				#DIV/0!				#DIV/0!				#DIV/0!				#DIV/0!
		0	0	#DIV/0!	0	0	#DIV/0!		0	0	#DIV/0!				#DIV/0!				#DIV/0!				#DIV/0!				#DIV/0!				#DIV/0!				#DIV/0!				#DIV/0!				#DIV/0!				#DIV/0!
		0	0	#DIV/0!	0	0	#DIV/0!		0	0	#DIV/0!				#DIV/0!				#DIV/0!				#DIV/0!				#DIV/0!				#DIV/0!				#DIV/0!				#DIV/0!				#DIV/0!				#DIV/0!
		0	0	#DIV/0!	0	0	#DIV/0!		0	0	#DIV/0!				#DIV/0!				#DIV/0!				#DIV/0!				#DIV/0!				#DIV/0!				#DIV/0!				#DIV/0!				#DIV/0!				#DIV/0!
		0	0	#DIV/0!	0	0	#DIV/0!		0	0	#DIV/0!				#DIV/0!				#DIV/0!				#DIV/0!				#DIV/0!				#DIV/0!				#DIV/0!				#DIV/0!				#DIV/0!				#DIV/0!
		0	0	#DIV/0!	0	0	#DIV/0!		0	0	#DIV/0!				#DIV/0!				#DIV/0!				#DIV/0!				#DIV/0!				#DIV/0!				#DIV/0!				#DIV/0!				#DIV/0!				#DIV/0!
		0	0	#DIV/0!	0	0	#DIV/0!		0	0	#DIV/0!				#DIV/0!				#DIV/0!				#DIV/0!				#DIV/0!				#DIV/0!				#DIV/0!				#DIV/0!				#DIV/0!				#DIV/0!
		0	0	#DIV/0!	0	0	#DIV/0!		0	0	#DIV/0!				#DIV/0!				#DIV/0!				#DIV/0!				#DIV/0!				#DIV/0!				#DIV/0!				#DIV/0!				#DIV/0!				#DIV/0!
		0	0	#DIV/0!	0	0	#DIV/0!		0	0	#DIV/0!				#DIV/0!				#DIV/0!				#DIV/0!				#DIV/0!				#DIV/0!				#DIV/0!				#DIV/0!				#DIV/0!				#DIV/0!
		0	0	#DIV/0!	0	0	#DIV/0!		0	0	#DIV/0!				#DIV/0!				#DIV/0!				#DIV/0!				#DIV/0!				#DIV/0!				#DIV/0!				#DIV/0!				#DIV/0!				#DIV/0!
		0	0	#DIV/0!	0	0	#DIV/0!		0	0	#DIV/0!				#DIV/0!				#DIV/0!				#DIV/0!				#DIV/0!				#DIV/0!				#DIV/0!				#DIV/0!				#DIV/0!				#DIV/0!
		0	0	#DIV/0!	0	0	#DIV/0!		0	0	#DIV/0!				#DIV/0!				#DIV/0!				#DIV/0!				#DIV/0!				#DIV/0!				#DIV/0!				#DIV/0!				#DIV/0!				#DIV/0!
		0	0	#DIV/0!	0	0	#DIV/0!		0	0	#DIV/0!				#DIV/0!				#DIV/0!				#DIV/0!				#DIV/0!				#DIV/0!				#DIV/0!				#DIV/0!				#DIV/0!				#DIV/0!
		0	0	#DIV/0!	0	0	#DIV/0!		0	0	#DIV/0!				#DIV/0!				#DIV/0!				#DIV/0!				#DIV/0!				#DIV/0!				#DIV/0!				#DIV/0!				#DIV/0!				#DIV/0!
		0	0	#DIV/0!	0	0	#DIV/0!		0	0	#DIV/0!				#DIV/0!				#DIV/0!				#DIV/0!				#DIV/0!				#DIV/0!				#DIV/0!				#DIV/0!				#DIV/0!				#DIV/0!
		0	0	#DIV/0!	0	0	#DIV/0!		0	0	#DIV/0!				#DIV/0!				#DIV/0!				#DIV/0!				#DIV/0!				#DIV/0!				#DIV/0!				#DIV/0!				#DIV/0!				#DIV/0!
		0	0	#DIV/0!	0	0	#DIV/0!		0	0	#DIV/0!				#DIV/0!				#DIV/0!				#DIV/0!				#DIV/0!				#DIV/0!				#DIV/0!				#DIV/0!				#DIV/0!				#DIV/0!
		0	0	#DIV/0!	0	0	#DIV/0!		0	0	#DIV/0!				#DIV/0!				#DIV/0!				#DIV/0!				#DIV/0!				#DIV/0!				#DIV/0!				#DIV/0!				#DIV/0!				#DIV/0!
		0	0	#DIV/0!	0	0	#DIV/0!		0	0	#DIV/0!				#DIV/0!				#DIV/0!				#DIV/0!				#DIV/0!				#DIV/0!				#DIV/0!				#DIV/0!				#DIV/0!				#DIV/0!
		0	0	#DIV/0!	0	0	#DIV/0!		0	0	#DIV/0!				#DIV/0!				#DIV/0!				#DIV/0!				#DIV/0!				#DIV/0!				#DIV/0!				#DIV/0!				#DIV/0!				#DIV/0!
		0	0	#DIV/0!	0	0	#DIV/0!		0	0	#DIV/0!				#DIV/0!				#DIV/0!				#DIV/0!				#DIV/0!				#DIV/0!				#DIV/0!				#DIV/0!				#DIV/0!				#DIV/0!
		0	0	#DIV/0!	0	0	#DIV/0!		0	0	#DIV/0!				#DIV/0!				#DIV/0!				#DIV/0!				#DIV/0!				#DIV/0!				#DIV/0!				#DIV/0!				#DIV/0!				#DIV/0!
		0	0	#DIV/0!	0	0	#DIV/0!		0	0	#DIV/0!				#DIV/0!				#DIV/0!				#DIV/0!				#DIV/0!				#DIV/0!				#DIV/0!				#DIV/0!				#DIV/0!				#DIV/0!
		0	0	#DIV/0!	0	0	#DIV/0!		0	0	#DIV/0!				#DIV/0!				#DIV/0!				#DIV/0!				#DIV/0!				#DIV/0!				#DIV/0!				#DIV/0!				#DIV/0!				#DIV/0!
		0	0	#DIV/0!	0	0	#DIV/0!		0	0	#DIV/0!				#DIV/0!				#DIV/0!				#DIV/0!				#DIV/0!				#DIV/0!				#DIV/0!				#DIV/0!				#DIV/0!				#DIV/0!
		0	0	#DIV/0!	0	0	#DIV/0!		0	0	#DIV/0!				#DIV/0!				#DIV/0!				#DIV/0!				#DIV/0!				#DIV/0!				#DIV/0!				#DIV/0!				#DIV/0!				#DIV/0!
		0	0	#DIV/0!	0	0	#DIV/0!		0	0	#DIV/0!				#DIV/0!				#DIV/0!				#DIV/0!				#DIV/0!				#DIV/0!				#DIV/0!				#DIV/0!				#DIV/0!				#DIV/0!
		0	0	#DIV/0!	0	0	#DIV/0!		0	0	#DIV/0!				#DIV/0!				#DIV/0!				#DIV/0!				#DIV/0!				#DIV/0!				#DIV/0!				#DIV/0!				#DIV/0!				#DIV/0!
		0	0	#DIV/0!	0	0	#DIV/0!		0	0	#DIV/0!				#DIV/0!				#DIV/0!				#DIV/0!				#DIV/0!				#DIV/0!				#DIV/0!				#DIV/0!				#DIV/0!				#DIV/0!
		0	0	#DIV/0!	0	0	#DIV/0!		0	0	#DIV/0!				#DIV/0!				#DIV/0!				#DIV/0!				#DIV/0!				#DIV/0!				#DIV/0!				#DIV/0!				#DIV/0!				#DIV/0!
		0	0	#DIV/0!	0	0	#DIV/0!		0	0	#DIV/0!				#DIV/0!				#DIV/0!				#DIV/0!				#DIV/0!				#DIV/0!				#DIV/0!				#DIV/0!				#DIV/0!				#DIV/0!
		0	0	#DIV/0!	0	0	#DIV/0!		0	0	#DIV/0!				#DIV/0!				#DIV/0!				#DIV/0!				#DIV/0!				#DIV/0!				#DIV/0!				#DIV/0!				#DIV/0!				#DIV/0!
		0	0	#DIV/0!	0	0	#DIV/0!		0	0	#DIV/0!				#DIV/0!				#DIV/0!				#DIV/0!				#DIV/0!				#DIV/0!				#DIV/0!				#DIV/0!				#DIV/0!				#DIV/0!
		0	0	#DIV/0!	0	0	#DIV/0!		0	0	#DIV/0!				#DIV/0!				#DIV/0!				#DIV/0!				#DIV/0!				#DIV/0!				#DIV/0!				#DIV/0!				#DIV/0!				#DIV/0!
		0	0	#DIV/0!	0	0	#DIV/0!		0	0	#DIV/0!				#DIV/0!				#DIV/0!				#DIV/0!				#DIV/0!				#DIV/0!				#DIV/0!				#DIV/0!				#DIV/0!				#DIV/0!
		0	0	#DIV/0!	0	0	#DIV/0!		0	0	#DIV/0!				#DIV/0!				#DIV/0!				#DIV/0!				#DIV/0!				#DIV/0!				#DIV/0!				#DIV/0!				#DIV/0!				#DIV/0!
		0	0	#DIV/0!	0	0	#DIV/0!		0	0	#DIV/0!				#DIV/0!				#DIV/0!				#DIV/0!				#DIV/0!				#DIV/0!				#DIV/0!				#DIV/0!				#DIV/0!				#DIV/0!
		0	0	#DIV/0!	0	0	#DIV/0!		0	0	#DIV/0!				#DIV/0!				#DIV/0!				#DIV/0!				#DIV/0!				#DIV/0!				#DIV/0!				#DIV/0!				#DIV/0!				#DIV/0!
		0	0	#DIV/0!	0	0	#DIV/0!		0	0	#DIV/0!				#DIV/0!				#DIV/0!				#DIV/0!				#DIV/0!				#DIV/0!				#DIV/0!				#DIV/0!				#DIV/0!				#DIV/0!
		0	0	#DIV/0!	0	0	#DIV/0!		0	0	#DIV/0!				#DIV/0!				#DIV/0!				#DIV/0!				#DIV/0!				#DIV/0!				#DIV/0!				#DIV/0!				#DIV/0!				#DIV/0!
		0	0	#DIV/0!	0	0	#DIV/0!		0	0	#DIV/0!				#DIV/0!				#DIV/0!				#DIV/0!				#DIV/0!				#DIV/0!				#DIV/0!				#DIV/0!				#DIV/0!				#DIV/0!
		0	0	#DIV/0!	0	0	#DIV/0!		0	0	#DIV/0!				#DIV/0!				#DIV/0!				#DIV/0!				#DIV/0!				#DIV/0!				#DIV/0!				#DIV/0!				#DIV/0!				#DIV/0!
		0	0	#DIV/0!	0	0	#DIV/0!		0	0	#DIV/0!				#DIV/0!				#DIV/0!				#DIV/0!				#DIV/0!				#DIV/0!				#DIV/0!				#DIV/0!				#DIV/0!				#DIV/0!
		0	0	#DIV/0!	0	0	#DIV/0!		0	0	#DIV/0!				#DIV/0!				#DIV/0!				#DIV/0!				#DIV/0!				#DIV/0!				#DIV/0!				#DIV/0!				#DIV/0!				#DIV/0!
		0	0	#DIV/0!	0	0	#DIV/0!		0	0	#DIV/0!				#DIV/0!				#DIV/0!				#DIV/0!				#DIV/0!				#DIV/0!				#DIV/0!				#DIV/0!				#DIV/0!				#DIV/0!
		0	0	#DIV/0!	0	0	#DIV/0!		0	0	#DIV/0!				#DIV/0!				#DIV/0!				#DIV/0!				#DIV/0!				#DIV/0!				#DIV/0!				#DIV/0!				#DIV/0!				#DIV/0!
		0	0	#DIV/0!	0	0	#DIV/0!		0	0	#DIV/0!				#DIV/0!				#DIV/0!				#DIV/0!				#DIV/0!				#DIV/0!				#DIV/0!				#DIV/0!				#DIV/0!				#DIV/0!
		0	0	#DIV/0!	0	0	#DIV/0!		0	0	#DIV/0!				#DIV/0!				#DIV/0!				#DIV/0!				#DIV/0!				#DIV/0!				#DIV/0!				#DIV/0!				#DIV/0!				#DIV/0!
		0	0	#DIV/0!	0	0	#DIV/0!		0	0	#DIV/0!				#DIV/0!				#DIV/0!				#DIV/0!				#DIV/0!				#DIV/0!				#DIV/0!				#DIV/0!				#DIV/0!				#DIV/0!
		0	0	#DIV/0!	0	0	#DIV/0!		0	0	#DIV/0!				#DIV/0!				#DIV/0!				#DIV/0!				#DIV/0!				#DIV/0!				#DIV/0!				#DIV/0!				#DIV/0!				#DIV/0!
		0	0	#DIV/0!	0	0	#DIV/0!		0	0	#DIV/0!				#DIV/0!				#DIV/0!				#DIV/0!				#DIV/0!				#DIV/0!				#DIV/0!				#DIV/0!				#DIV/0!				#DIV/0!
		0	0	#DIV/0!	0	0	#DIV/0!		0	0	#DIV/0!				#DIV/0!				#DIV/0!				#DIV/0!				#DIV/0!				#DIV/0!				#DIV/0!				#DIV/0!				#DIV/0!				#DIV/0!
		0	0	#DIV/0!	0	0	#DIV/0!		0	0	#DIV/0!				#DIV/0!				#DIV/0!				#DIV/0!				#DIV/0!				#DIV/0!				#DIV/0!				#DIV/0!				#DIV/0!				#DIV/0!
		0	0	#DIV/0!	0	0	#DIV/0!		0	0	#DIV/0!				#DIV/0!				#DIV/0!				#DIV/0!				#DIV/0!				#DIV/0!				#DIV/0!				#DIV/0!				#DIV/0!				#DIV/0!
		0	0	#DIV/0!	0	0	#DIV/0!		0	0	#DIV/0!				#DIV/0!				#DIV/0!				#DIV/0!				#DIV/0!				#DIV/0!				#DIV/0!				#DIV/0!				#DIV/0!				#DIV/0!
		0	0	#DIV/0!	0	0	#DIV/0!		0	0	#DIV/0!				#DIV/0!				#DIV/0!				#DIV/0!				#DIV/0!				#DIV/0!				#DIV/0!				#DIV/0!				#DIV/0!				#DIV/0!
		0	0	#DIV/0!	0	0	#DIV/0!		0	0	#DIV/0!				#DIV/0!				#DIV/0!				#DIV/0!				#DIV/0!				#DIV/0!				#DIV/0!				#DIV/0!				#DIV/0!				#DIV/0!
		0	0	#DIV/0!	0	0	#DIV/0!		0	0	#DIV/0!				#DIV/0!				#DIV/0!				#DIV/0!				#DIV/0!				#DIV/0!				#DIV/0!				#DIV/0!				#DIV/0!				#DIV/0!
		0	0	#DIV/0!	0	0	#DIV/0!		0	0	#DIV/0!				#DIV/0!				#DIV/0!				#DIV/0!				#DIV/0!				#DIV/0!				#DIV/0!				#DIV/0!				#DIV/0!				#DIV/0!
		0	0	#DIV/0!	0	0	#DIV/0!		0	0	#DIV/0!				#DIV/0!				#DIV/0!				#DIV/0!				#DIV/0!				#DIV/0!				#DIV/0!				#DIV/0!				#DIV/0!				#DIV/0!
		0	0	#DIV/0!	0	0	#DIV/0!		0	0	#DIV/0!				#DIV/0!				#DIV/0!				#DIV/0!				#DIV/0!				#DIV/0!				#DIV/0!				#DIV/0!				#DIV/0!				#DIV/0!
		0	0	#DIV/0!	0	0	#DIV/0!		0	0	#DIV/0!				#DIV/0!				#DIV/0!				#DIV/0!				#DIV/0!				#DIV/0!				#DIV/0!				#DIV/0!				#DIV/0!				#DIV/0!
		0	0	#DIV/0!	0	0	#DIV/0!		0	0	#DIV/0!				#DIV/0!				#DIV/0!				#DIV/0!				#DIV/0!				#DIV/0!				#DIV/0!				#DIV/0!				#DIV/0!				#DIV/0!
		0	0	#DIV/0!	0	0	#DIV/0!		0	0	#DIV/0!				#DIV/0!				#DIV/0!				#DIV/0!				#DIV/0!				#DIV/0!				#DIV/0!				#DIV/0!				#DIV/0!				#DIV/0!
		0	0	#DIV/0!	0	0	#DIV/0!		0	0	#DIV/0!				#DIV/0!				#DIV/0!				#DIV/0!				#DIV/0!				#DIV/0!				#DIV/0!				#DIV/0!				#DIV/0!				#DIV/0!
		0	0	#DIV/0!	0	0	#DIV/0!		0	0	#DIV/0!				#DIV/0!				#DIV/0!				#DIV/0!				#DIV/0!				#DIV/0!				#DIV/0!				#DIV/0!				#DIV/0!				#DIV/0!
		0	0	#DIV/0!	0	0	#DIV/0!		0	0	#DIV/0!				#DIV/0!				#DIV/0!				#DIV/0!				#DIV/0!				#DIV/0!				#DIV/0!				#DIV/0!				#DIV/0!				#DIV/0!
		0	0	#DIV/0!	0	0	#DIV/0!		0	0	#DIV/0!				#DIV/0!				#DIV/0!				#DIV/0!				#DIV/0!				#DIV/0!				#DIV/0!				#DIV/0!				#DIV/0!				#DIV/0!
		0	0	#DIV/0!	0	0	#DIV/0!		0	0	#DIV/0!				#DIV/0!				#DIV/0!				#DIV/0!				#DIV/0!				#DIV/0!				#DIV/0!				#DIV/0!				#DIV/0!				#DIV/0!
		0	0	#DIV/0!	0	0	#DIV/0!		0	0	#DIV/0!				#DIV/0!				#DIV/0!				#DIV/0!				#DIV/0!				#DIV/0!				#DIV/0!				#DIV/0!				#DIV/0!				#DIV/0!
		0	0	#DIV/0!	0	0	#DIV/0!		0	0	#DIV/0!				#DIV/0!				#DIV/0!				#DIV/0!				#DIV/0!				#DIV/0!				#DIV/0!				#DIV/0!				#DIV/0!				#DIV/0!
		0	0	#DIV/0!	0	0	#DIV/0!		0	0	#DIV/0!				#DIV/0!				#DIV/0!				#DIV/0!				#DIV/0!				#DIV/0!				#DIV/0!				#DIV/0!				#DIV/0!				#DIV/0!
		0	0	#DIV/0!	0	0	#DIV/0!		0	0	#DIV/0!				#DIV/0!				#DIV/0!				#DIV/0!				#DIV/0!				#DIV/0!				#DIV/0!				#DIV/0!				#DIV/0!				#DIV/0!
		0	0	#DIV/0!	0	0	#DIV/0!		0	0	#DIV/0!				#DIV/0!				#DIV/0!				#DIV/0!				#DIV/0!				#DIV/0!				#DIV/0!				#DIV/0!				#DIV/0!				#DIV/0!
		0	0	#DIV/0!	0	0	#DIV/0!		0	0	#DIV/0!				#DIV/0!				#DIV/0!				#DIV/0!				#DIV/0!				#DIV/0!				#DIV/0!				#DIV/0!				#DIV/0!				#DIV/0!
		0	0	#DIV/0!	0	0	#DIV/0!		0	0	#DIV/0!				#DIV/0!				#DIV/0!				#DIV/0!				#DIV/0!				#DIV/0!				#DIV/0!				#DIV/0!				#DIV/0!				#DIV/0!
		0	0	#DIV/0!	0	0	#DIV/0!		0	0	#DIV/0!				#DIV/0!				#DIV/0!				#DIV/0!				#DIV/0!				#DIV/0!				#DIV/0!				#DIV/0!				#DIV/0!				#DIV/0!
		0	0	#DIV/0!	0	0	#DIV/0!		0	0	#DIV/0!				#DIV/0!				#DIV/0!				#DIV/0!				#DIV/0!				#DIV/0!				#DIV/0!				#DIV/0!				#DIV/0!				#DIV/0!
		0	0	#DIV/0!	0	0	#DIV/0!		0	0	#DIV/0!				#DIV/0!				#DIV/0!				#DIV/0!				#DIV/0!				#DIV/0!				#DIV/0!				#DIV/0!				#DIV/0!				#DIV/0!
		0	0	#DIV/0!	0	0	#DIV/0!		0	0	#DIV/0!				#DIV/0!				#DIV/0!				#DIV/0!				#DIV/0!				#DIV/0!				#DIV/0!				#DIV/0!				#DIV/0!				#DIV/0!
		0	0	#DIV/0!	0	0	#DIV/0!		0	0	#DIV/0!				#DIV/0!				#DIV/0!				#DIV/0!				#DIV/0!				#DIV/0!				#DIV/0!				#DIV/0!				#DIV/0!				#DIV/0!
		0	0	#DIV/0!	0	0	#DIV/0!		0	0	#DIV/0!				#DIV/0!				#DIV/0!				#DIV/0!				#DIV/0!				#DIV/0!				#DIV/0!				#DIV/0!				#DIV/0!				#DIV/0!
		0	0	#DIV/0!	0	0	#DIV/0!		0	0	#DIV/0!				#DIV/0!				#DIV/0!				#DIV/0!				#DIV/0!				#DIV/0!				#DIV/0!				#DIV/0!				#DIV/0!				#DIV/0!
		0	0	#DIV/0!	0	0	#DIV/0!		0	0	#DIV/0!				#DIV/0!				#DIV/0!				#DIV/0!				#DIV/0!				#DIV/0!				#DIV/0!				#DIV/0!				#DIV/0!				#DIV/0!
		0	0	#DIV/0!	0	0	#DIV/0!		0	0	#DIV/0!				#DIV/0!				#DIV/0!				#DIV/0!				#DIV/0!				#DIV/0!				#DIV/0!				#DIV/0!				#DIV/0!				#DIV/0!
		0	0	#DIV/0!	0	0	#DIV/0!		0	0	#DIV/0!				#DIV/0!				#DIV/0!				#DIV/0!				#DIV/0!				#DIV/0!				#DIV/0!				#DIV/0!				#DIV/0!				#DIV/0!
		0	0	#DIV/0!	0	0	#DIV/0!		0	0	#DIV/0!				#DIV/0!				#DIV/0!				#DIV/0!				#DIV/0!				#DIV/0!				#DIV/0!				#DIV/0!				#DIV/0!				#DIV/0!
		0	0	#DIV/0!	0	0	#DIV/0!		0	0	#DIV/0!				#DIV/0!				#DIV/0!				#DIV/0!				#DIV/0!				#DIV/0!				#DIV/0!				#DIV/0!				#DIV/0!				#DIV/0!
		0	0	#DIV/0!	0	0	#DIV/0!		0	0	#DIV/0!				#DIV/0!				#DIV/0!				#DIV/0!				#DIV/0!				#DIV/0!				#DIV/0!				#DIV/0!				#DIV/0!				#DIV/0!
		0	0	#DIV/0!	0	0	#DIV/0!		0	0	#DIV/0!				#DIV/0!				#DIV/0!				#DIV/0!				#DIV/0!				#DIV/0!				#DIV/0!				#DIV/0!				#DIV/0!				#DIV/0!
		0	0	#DIV/0!	0	0	#DIV/0!		0	0	#DIV/0!				#DIV/0!				#DIV/0!				#DIV/0!				#DIV/0!				#DIV/0!				#DIV/0!				#DIV/0!				#DIV/0!				#DIV/0!
		0	0	#DIV/0!	0	0	#DIV/0!		0	0	#DIV/0!				#DIV/0!				#DIV/0!				#DIV/0!				#DIV/0!				#DIV/0!				#DIV/0!				#DIV/0!				#DIV/0!				#DIV/0!
		0	0	#DIV/0!	0	0	#DIV/0!		0	0	#DIV/0!				#DIV/0!				#DIV/0!				#DIV/0!				#DIV/0!				#DIV/0!				#DIV/0!				#DIV/0!				#DIV/0!				#DIV/0!
		0	0	#DIV/0!	0	0	#DIV/0!		0	0	#DIV/0!				#DIV/0!				#DIV/0!				#DIV/0!				#DIV/0!				#DIV/0!				#DIV/0!				#DIV/0!				#DIV/0!				#DIV/0!
		0	0	#DIV/0!	0	0	#DIV/0!		0	0	#DIV/0!				#DIV/0!				#DIV/0!				#DIV/0!				#DIV/0!				#DIV/0!				#DIV/0!				#DIV/0!				#DIV/0!				#DIV/0!
		0	0	#DIV/0!	0	0	#DIV/0!		0	0	#DIV/0!				#DIV/0!				#DIV/0!				#DIV/0!				#DIV/0!				#DIV/0!				#DIV/0!				#DIV/0!				#DIV/0!				#DIV/0!
		0	0	#DIV/0!	0	0	#DIV/0!		0	0	#DIV/0!				#DIV/0!				#DIV/0!				#DIV/0!				#DIV/0!				#DIV/0!				#DIV/0!				#DIV/0!				#DIV/0!				#DIV/0!
		0	0	#DIV/0!	0	0	#DIV/0!		0	0	#DIV/0!				#DIV/0!				#DIV/0!				#DIV/0!				#DIV/0!				#DIV/0!				#DIV/0!				#DIV/0!				#DIV/0!				#DIV/0!
		0	0	#DIV/0!	0	0	#DIV/0!		0	0	#DIV/0!				#DIV/0!				#DIV/0!				#DIV/0!				#DIV/0!				#DIV/0!				#DIV/0!				#DIV/0!				#DIV/0!				#DIV/0!
		0	0	#DIV/0!	0	0	#DIV/0!		0	0	#DIV/0!				#DIV/0!				#DIV/0!				#DIV/0!				#DIV/0!				#DIV/0!				#DIV/0!				#DIV/0!				#DIV/0!				#DIV/0!
		0	0	#DIV/0!	0	0	#DIV/0!		0	0	#DIV/0!				#DIV/0!				#DIV/0!				#DIV/0!				#DIV/0!				#DIV/0!				#DIV/0!				#DIV/0!				#DIV/0!				#DIV/0!
		0	0	#DIV/0!	0	0	#DIV/0!		0	0	#DIV/0!				#DIV/0!				#DIV/0!				#DIV/0!				#DIV/0!				#DIV/0!				#DIV/0!				#DIV/0!				#DIV/0!				#DIV/0!
		0	0	#DIV/0!	0	0	#DIV/0!		0	0	#DIV/0!				#DIV/0!				#DIV/0!				#DIV/0!				#DIV/0!				#DIV/0!				#DIV/0!				#DIV/0!				#DIV/0!				#DIV/0!
		0	0	#DIV/0!	0	0	#DIV/0!		0	0	#DIV/0!				#DIV/0!				#DIV/0!				#DIV/0!				#DIV/0!				#DIV/0!				#DIV/0!				#DIV/0!				#DIV/0!				#DIV/0!
		0	0	#DIV/0!	0	0	#DIV/0!		0	0	#DIV/0!				#DIV/0!				#DIV/0!				#DIV/0!				#DIV/0!				#DIV/0!				#DIV/0!				#DIV/0!				#DIV/0!				#DIV/0!
		0	0	#DIV/0!	0	0	#DIV/0!		0	0	#DIV/0!				#DIV/0!				#DIV/0!				#DIV/0!				#DIV/0!				#DIV/0!				#DIV/0!				#DIV/0!				#DIV/0!				#DIV/0!
		0	0	#DIV/0!	0	0	#DIV/0!		0	0	#DIV/0!				#DIV/0!				#DIV/0!				#DIV/0!				#DIV/0!				#DIV/0!				#DIV/0!				#DIV/0!				#DIV/0!				#DIV/0!
		0	0	#DIV/0!	0	0	#DIV/0!		0	0	#DIV/0!				#DIV/0!				#DIV/0!				#DIV/0!				#DIV/0!				#DIV/0!				#DIV/0!				#DIV/0!				#DIV/0!				#DIV/0!
		0	0	#DIV/0!	0	0	#DIV/0!		0	0	#DIV/0!				#DIV/0!				#DIV/0!				#DIV/0!				#DIV/0!				#DIV/0!				#DIV/0!				#DIV/0!				#DIV/0!				#DIV/0!
		0	0	#DIV/0!	0	0	#DIV/0!		0	0	#DIV/0!				#DIV/0!				#DIV/0!				#DIV/0!				#DIV/0!				#DIV/0!				#DIV/0!				#DIV/0!				#DIV/0!				#DIV/0!
		0	0	#DIV/0!	0	0	#DIV/0!		0	0	#DIV/0!				#DIV/0!				#DIV/0!				#DIV/0!				#DIV/0!				#DIV/0!				#DIV/0!				#DIV/0!				#DIV/0!				#DIV/0!
		0	0	#DIV/0!	0	0	#DIV/0!		0	0	#DIV/0!				#DIV/0!				#DIV/0!				#DIV/0!				#DIV/0!				#DIV/0!				#DIV/0!				#DIV/0!				#DIV/0!				#DIV/0!
		0	0	#DIV/0!	0	0	#DIV/0!		0	0	#DIV/0!				#DIV/0!				#DIV/0!				#DIV/0!				#DIV/0!				#DIV/0!				#DIV/0!				#DIV/0!				#DIV/0!				#DIV/0!
		0	0	#DIV/0!	0	0	#DIV/0!		0	0	#DIV/0!				#DIV/0!				#DIV/0!				#DIV/0!				#DIV/0!				#DIV/0!				#DIV/0!				#DIV/0!				#DIV/0!				#DIV/0!
		0	0	#DIV/0!	0	0	#DIV/0!		0	0	#DIV/0!				#DIV/0!				#DIV/0!				#DIV/0!				#DIV/0!				#DIV/0!				#DIV/0!				#DIV/0!				#DIV/0!				#DIV/0!
		0	0	#DIV/0!	0	0	#DIV/0!		0	0	#DIV/0!				#DIV/0!				#DIV/0!				#DIV/0!				#DIV/0!				#DIV/0!				#DIV/0!				#DIV/0!				#DIV/0!				#DIV/0!
		0	0	#DIV/0!	0	0	#DIV/0!		0	0	#DIV/0!				#DIV/0!				#DIV/0!				#DIV/0!				#DIV/0!				#DIV/0!				#DIV/0!				#DIV/0!				#DIV/0!				#DIV/0!
		0	0	#DIV/0!	0	0	#DIV/0!		0	0	#DIV/0!				#DIV/0!				#DIV/0!				#DIV/0!				#DIV/0!				#DIV/0!				#DIV/0!				#DIV/0!				#DIV/0!				#DIV/0!
		0	0	#DIV/0!	0	0	#DIV/0!		0	0	#DIV/0!				#DIV/0!				#DIV/0!				#DIV/0!				#DIV/0!				#DIV/0!				#DIV/0!				#DIV/0!				#DIV/0!				#DIV/0!
		0	0	#DIV/0!	0	0	#DIV/0!		0	0	#DIV/0!				#DIV/0!				#DIV/0!				#DIV/0!				#DIV/0!				#DIV/0!				#DIV/0!				#DIV/0!				#DIV/0!				#DIV/0!
		0	0	#DIV/0!	0	0	#DIV/0!		0	0	#DIV/0!				#DIV/0!				#DIV/0!				#DIV/0!				#DIV/0!				#DIV/0!				#DIV/0!				#DIV/0!				#DIV/0!				#DIV/0!
		0	0	#DIV/0!	0	0	#DIV/0!		0	0	#DIV/0!				#DIV/0!				#DIV/0!				#DIV/0!				#DIV/0!				#DIV/0!				#DIV/0!				#DIV/0!				#DIV/0!				#DIV/0!
		0	0	#DIV/0!	0	0	#DIV/0!		0	0	#DIV/0!				#DIV/0!				#DIV/0!				#DIV/0!				#DIV/0!				#DIV/0!				#DIV/0!				#DIV/0!				#DIV/0!				#DIV/0!
		0	0	#DIV/0!	0	0	#DIV/0!		0	0	#DIV/0!				#DIV/0!				#DIV/0!				#DIV/0!				#DIV/0!				#DIV/0!				#DIV/0!				#DIV/0!				#DIV/0!				#DIV/0!
		0	0	#DIV/0!	0	0	#DIV/0!		0	0	#DIV/0!				#DIV/0!				#DIV/0!				#DIV/0!				#DIV/0!				#DIV/0!				#DIV/0!				#DIV/0!				#DIV/0!				#DIV/0!
		0	0	#DIV/0!	0	0	#DIV/0!		0	0	#DIV/0!				#DIV/0!				#DIV/0!				#DIV/0!				#DIV/0!				#DIV/0!				#DIV/0!				#DIV/0!				#DIV/0!				#DIV/0!
		0	0	#DIV/0!	0	0	#DIV/0!		0	0	#DIV/0!				#DIV/0!				#DIV/0!				#DIV/0!				#DIV/0!				#DIV/0!				#DIV/0!				#DIV/0!				#DIV/0!				#DIV/0!
		0	0	#DIV/0!	0	0	#DIV/0!		0	0	#DIV/0!				#DIV/0!				#DIV/0!				#DIV/0!				#DIV/0!				#DIV/0!				#DIV/0!				#DIV/0!				#DIV/0!				#DIV/0!
		0	0	#DIV/0!	0	0	#DIV/0!		0	0	#DIV/0!				#DIV/0!				#DIV/0!				#DIV/0!				#DIV/0!				#DIV/0!				#DIV/0!				#DIV/0!				#DIV/0!				#DIV/0!
		0	0	#DIV/0!	0	0	#DIV/0!		0	0	#DIV/0!				#DIV/0!				#DIV/0!				#DIV/0!				#DIV/0!				#DIV/0!				#DIV/0!				#DIV/0!				#DIV/0!				#DIV/0!
		0	0	#DIV/0!	0	0	#DIV/0!		0	0	#DIV/0!				#DIV/0!				#DIV/0!				#DIV/0!				#DIV/0!				#DIV/0!				#DIV/0!				#DIV/0!				#DIV/0!				#DIV/0!
		0	0	#DIV/0!	0	0	#DIV/0!		0	0	#DIV/0!				#DIV/0!				#DIV/0!				#DIV/0!				#DIV/0!				#DIV/0!				#DIV/0!				#DIV/0!				#DIV/0!				#DIV/0!
		0	0	#DIV/0!	0	0	#DIV/0!		0	0	#DIV/0!				#DIV/0!				#DIV/0!				#DIV/0!				#DIV/0!				#DIV/0!				#DIV/0!				#DIV/0!				#DIV/0!				#DIV/0!
		0	0	#DIV/0!	0	0	#DIV/0!		0	0	#DIV/0!				#DIV/0!				#DIV/0!				#DIV/0!				#DIV/0!				#DIV/0!				#DIV/0!				#DIV/0!				#DIV/0!				#DIV/0!
		0	0	#DIV/0!	0	0	#DIV/0!		0	0	#DIV/0!				#DIV/0!				#DIV/0!				#DIV/0!				#DIV/0!				#DIV/0!				#DIV/0!				#DIV/0!				#DIV/0!				#DIV/0!
		0	0	#DIV/0!	0	0	#DIV/0!		0	0	#DIV/0!				#DIV/0!				#DIV/0!				#DIV/0!				#DIV/0!				#DIV/0!				#DIV/0!				#DIV/0!				#DIV/0!				#DIV/0!
		0	0	#DIV/0!	0	0	#DIV/0!		0	0	#DIV/0!				#DIV/0!				#DIV/0!				#DIV/0!				#DIV/0!				#DIV/0!				#DIV/0!				#DIV/0!				#DIV/0!				#DIV/0!
		0	0	#DIV/0!	0	0	#DIV/0!		0	0	#DIV/0!				#DIV/0!				#DIV/0!				#DIV/0!				#DIV/0!				#DIV/0!				#DIV/0!				#DIV/0!				#DIV/0!				#DIV/0!
		0	0	#DIV/0!	0	0	#DIV/0!		0	0	#DIV/0!				#DIV/0!				#DIV/0!				#DIV/0!				#DIV/0!				#DIV/0!				#DIV/0!				#DIV/0!				#DIV/0!				#DIV/0!
		0	0	#DIV/0!	0	0	#DIV/0!		0	0	#DIV/0!				#DIV/0!				#DIV/0!				#DIV/0!				#DIV/0!				#DIV/0!				#DIV/0!				#DIV/0!				#DIV/0!				#DIV/0!
		0	0	#DIV/0!	0	0	#DIV/0!		0	0	#DIV/0!				#DIV/0!				#DIV/0!				#DIV/0!				#DIV/0!				#DIV/0!				#DIV/0!				#DIV/0!				#DIV/0!				#DIV/0!
		0	0	#DIV/0!	0	0	#DIV/0!		0	0	#DIV/0!				#DIV/0!				#DIV/0!				#DIV/0!				#DIV/0!				#DIV/0!				#DIV/0!				#DIV/0!				#DIV/0!				#DIV/0!
		0	0	#DIV/0!	0	0	#DIV/0!		0	0	#DIV/0!				#DIV/0!				#DIV/0!				#DIV/0!				#DIV/0!				#DIV/0!				#DIV/0!				#DIV/0!				#DIV/0!				#DIV/0!
		0	0	#DIV/0!	0	0	#DIV/0!		0	0	#DIV/0!				#DIV/0!				#DIV/0!				#DIV/0!				#DIV/0!				#DIV/0!				#DIV/0!				#DIV/0!				#DIV/0!				#DIV/0!
		0	0	#DIV/0!	0	0	#DIV/0!		0	0	#DIV/0!				#DIV/0!				#DIV/0!				#DIV/0!				#DIV/0!				#DIV/0!				#DIV/0!				#DIV/0!				#DIV/0!				#DIV/0!
		0	0	#DIV/0!	0	0	#DIV/0!		0	0	#DIV/0!				#DIV/0!				#DIV/0!				#DIV/0!				#DIV/0!				#DIV/0!				#DIV/0!				#DIV/0!				#DIV/0!				#DIV/0!
		0	0	#DIV/0!	0	0	#DIV/0!		0	0	#DIV/0!				#DIV/0!				#DIV/0!				#DIV/0!				#DIV/0!				#DIV/0!				#DIV/0!				#DIV/0!				#DIV/0!				#DIV/0!
		0	0	#DIV/0!	0	0	#DIV/0!		0	0	#DIV/0!				#DIV/0!				#DIV/0!				#DIV/0!				#DIV/0!				#DIV/0!				#DIV/0!				#DIV/0!				#DIV/0!				#DIV/0!
		0	0	#DIV/0!	0	0	#DIV/0!		0	0	#DIV/0!				#DIV/0!				#DIV/0!				#DIV/0!				#DIV/0!				#DIV/0!				#DIV/0!				#DIV/0!				#DIV/0!				#DIV/0!
		0	0	#DIV/0!	0	0	#DIV/0!		0	0	#DIV/0!				#DIV/0!				#DIV/0!				#DIV/0!				#DIV/0!				#DIV/0!				#DIV/0!				#DIV/0!				#DIV/0!				#DIV/0!
		0	0	#DIV/0!	0	0	#DIV/0!		0	0	#DIV/0!				#DIV/0!				#DIV/0!				#DIV/0!				#DIV/0!				#DIV/0!				#DIV/0!				#DIV/0!				#DIV/0!				#DIV/0!
		0	0	#DIV/0!	0	0	#DIV/0!		0	0	#DIV/0!				#DIV/0!				#DIV/0!				#DIV/0!				#DIV/0!				#DIV/0!				#DIV/0!				#DIV/0!				#DIV/0!				#DIV/0!
		0	0	#DIV/0!	0	0	#DIV/0!		0	0	#DIV/0!				#DIV/0!				#DIV/0!				#DIV/0!				#DIV/0!				#DIV/0!				#DIV/0!				#DIV/0!				#DIV/0!				#DIV/0!
		0	0	#DIV/0!	0	0	#DIV/0!		0	0	#DIV/0!				#DIV/0!				#DIV/0!				#DIV/0!				#DIV/0!				#DIV/0!				#DIV/0!				#DIV/0!				#DIV/0!				#DIV/0!
		0	0	#DIV/0!	0	0	#DIV/0!		0	0	#DIV/0!				#DIV/0!				#DIV/0!				#DIV/0!				#DIV/0!				#DIV/0!				#DIV/0!				#DIV/0!				#DIV/0!				#DIV/0!
		0	0	#DIV/0!	0	0	#DIV/0!		0	0	#DIV/0!				#DIV/0!				#DIV/0!				#DIV/0!				#DIV/0!				#DIV/0!				#DIV/0!				#DIV/0!				#DIV/0!				#DIV/0!
		0	0	#DIV/0!	0	0	#DIV/0!		0	0	#DIV/0!				#DIV/0!				#DIV/0!				#DIV/0!				#DIV/0!				#DIV/0!				#DIV/0!				#DIV/0!				#DIV/0!				#DIV/0!
		0	0	#DIV/0!	0	0	#DIV/0!		0	0	#DIV/0!				#DIV/0!				#DIV/0!				#DIV/0!				#DIV/0!				#DIV/0!				#DIV/0!				#DIV/0!				#DIV/0!				#DIV/0!
		0	0	#DIV/0!	0	0	#DIV/0!		0	0	#DIV/0!				#DIV/0!				#DIV/0!				#DIV/0!				#DIV/0!				#DIV/0!				#DIV/0!				#DIV/0!				#DIV/0!				#DIV/0!
		0	0	#DIV/0!	0	0	#DIV/0!		0	0	#DIV/0!				#DIV/0!				#DIV/0!				#DIV/0!				#DIV/0!				#DIV/0!				#DIV/0!				#DIV/0!				#DIV/0!				#DIV/0!
		0	0	#DIV/0!	0	0	#DIV/0!		0	0	#DIV/0!				#DIV/0!				#DIV/0!				#DIV/0!				#DIV/0!				#DIV/0!				#DIV/0!				#DIV/0!				#DIV/0!				#DIV/0!
		0	0	#DIV/0!	0	0	#DIV/0!		0	0	#DIV/0!				#DIV/0!				#DIV/0!				#DIV/0!				#DIV/0!				#DIV/0!				#DIV/0!				#DIV/0!				#DIV/0!				#DIV/0!
		0	0	#DIV/0!	0	0	#DIV/0!		0	0	#DIV/0!				#DIV/0!				#DIV/0!				#DIV/0!				#DIV/0!				#DIV/0!				#DIV/0!				#DIV/0!				#DIV/0!				#DIV/0!
		0	0	#DIV/0!	0	0	#DIV/0!		0	0	#DIV/0!				#DIV/0!				#DIV/0!				#DIV/0!				#DIV/0!				#DIV/0!				#DIV/0!				#DIV/0!				#DIV/0!				#DIV/0!
		0	0	#DIV/0!	0	0	#DIV/0!		0	0	#DIV/0!				#DIV/0!				#DIV/0!				#DIV/0!				#DIV/0!				#DIV/0!				#DIV/0!				#DIV/0!				#DIV/0!				#DIV/0!
		0	0	#DIV/0!	0	0	#DIV/0!		0	0	#DIV/0!				#DIV/0!				#DIV/0!				#DIV/0!				#DIV/0!				#DIV/0!				#DIV/0!				#DIV/0!				#DIV/0!				#DIV/0!
		0	0	#DIV/0!	0	0	#DIV/0!		0	0	#DIV/0!				#DIV/0!				#DIV/0!				#DIV/0!				#DIV/0!				#DIV/0!				#DIV/0!				#DIV/0!				#DIV/0!				#DIV/0!
		0	0	#DIV/0!	0	0	#DIV/0!		0	0	#DIV/0!				#DIV/0!				#DIV/0!				#DIV/0!				#DIV/0!				#DIV/0!				#DIV/0!				#DIV/0!				#DIV/0!				#DIV/0!
		0	0	#DIV/0!	0	0	#DIV/0!		0	0	#DIV/0!				#DIV/0!				#DIV/0!				#DIV/0!				#DIV/0!				#DIV/0!				#DIV/0!				#DIV/0!				#DIV/0!				#DIV/0!
		0	0	#DIV/0!	0	0	#DIV/0!		0	0	#DIV/0!				#DIV/0!				#DIV/0!				#DIV/0!				#DIV/0!				#DIV/0!				#DIV/0!				#DIV/0!				#DIV/0!				#DIV/0!
		0	0	#DIV/0!	0	0	#DIV/0!		0	0	#DIV/0!				#DIV/0!				#DIV/0!				#DIV/0!				#DIV/0!				#DIV/0!				#DIV/0!				#DIV/0!				#DIV/0!				#DIV/0!
		0	0	#DIV/0!	0	0	#DIV/0!		0	0	#DIV/0!				#DIV/0!				#DIV/0!				#DIV/0!				#DIV/0!				#DIV/0!				#DIV/0!				#DIV/0!				#DIV/0!				#DIV/0!
		0	0	#DIV/0!	0	0	#DIV/0!		0	0	#DIV/0!				#DIV/0!				#DIV/0!				#DIV/0!				#DIV/0!				#DIV/0!				#DIV/0!				#DIV/0!				#DIV/0!				#DIV/0!
		0	0	#DIV/0!	0	0	#DIV/0!		0	0	#DIV/0!				#DIV/0!				#DIV/0!				#DIV/0!				#DIV/0!				#DIV/0!				#DIV/0!				#DIV/0!				#DIV/0!				#DIV/0!
		0	0	#DIV/0!	0	0	#DIV/0!		0	0	#DIV/0!				#DIV/0!				#DIV/0!				#DIV/0!				#DIV/0!				#DIV/0!				#DIV/0!				#DIV/0!				#DIV/0!				#DIV/0!
		0	0	#DIV/0!	0	0	#DIV/0!		0	0	#DIV/0!				#DIV/0!				#DIV/0!				#DIV/0!				#DIV/0!				#DIV/0!				#DIV/0!				#DIV/0!				#DIV/0!				#DIV/0!
		0	0	#DIV/0!	0	0	#DIV/0!		0	0	#DIV/0!				#DIV/0!				#DIV/0!				#DIV/0!				#DIV/0!				#DIV/0!				#DIV/0!				#DIV/0!				#DIV/0!				#DIV/0!
		0	0	#DIV/0!	0	0	#DIV/0!		0	0	#DIV/0!				#DIV/0!				#DIV/0!				#DIV/0!				#DIV/0!				#DIV/0!				#DIV/0!				#DIV/0!				#DIV/0!				#DIV/0!
		0	0	#DIV/0!	0	0	#DIV/0!		0	0	#DIV/0!				#DIV/0!				#DIV/0!				#DIV/0!				#DIV/0!				#DIV/0!				#DIV/0!				#DIV/0!				#DIV/0!				#DIV/0!
		0	0	#DIV/0!	0	0	#DIV/0!		0	0	#DIV/0!				#DIV/0!				#DIV/0!				#DIV/0!				#DIV/0!				#DIV/0!				#DIV/0!				#DIV/0!				#DIV/0!				#DIV/0!
		0	0	#DIV/0!	0	0	#DIV/0!		0	0	#DIV/0!				#DIV/0!				#DIV/0!				#DIV/0!				#DIV/0!				#DIV/0!				#DIV/0!				#DIV/0!				#DIV/0!				#DIV/0!
		0	0	#DIV/0!	0	0	#DIV/0!		0	0	#DIV/0!				#DIV/0!				#DIV/0!				#DIV/0!				#DIV/0!				#DIV/0!				#DIV/0!				#DIV/0!				#DIV/0!				#DIV/0!
		0	0	#DIV/0!	0	0	#DIV/0!		0	0	#DIV/0!				#DIV/0!				#DIV/0!				#DIV/0!				#DIV/0!				#DIV/0!				#DIV/0!				#DIV/0!				#DIV/0!				#DIV/0!
		0	0	#DIV/0!	0	0	#DIV/0!		0	0	#DIV/0!				#DIV/0!				#DIV/0!				#DIV/0!				#DIV/0!				#DIV/0!				#DIV/0!				#DIV/0!				#DIV/0!				#DIV/0!
		0	0	#DIV/0!	0	0	#DIV/0!		0	0	#DIV/0!				#DIV/0!				#DIV/0!				#DIV/0!				#DIV/0!				#DIV/0!				#DIV/0!				#DIV/0!				#DIV/0!				#DIV/0!
		0	0	#DIV/0!	0	0	#DIV/0!		0	0	#DIV/0!				#DIV/0!				#DIV/0!				#DIV/0!				#DIV/0!				#DIV/0!				#DIV/0!				#DIV/0!				#DIV/0!				#DIV/0!
		0	0	#DIV/0!	0	0	#DIV/0!		0	0	#DIV/0!				#DIV/0!				#DIV/0!				#DIV/0!				#DIV/0!				#DIV/0!				#DIV/0!				#DIV/0!				#DIV/0!				#DIV/0!
		0	0	#DIV/0!	0	0	#DIV/0!		0	0	#DIV/0!				#DIV/0!				#DIV/0!				#DIV/0!				#DIV/0!				#DIV/0!				#DIV/0!				#DIV/0!				#DIV/0!				#DIV/0!
		0	0	#DIV/0!	0	0	#DIV/0!		0	0	#DIV/0!				#DIV/0!				#DIV/0!				#DIV/0!				#DIV/0!				#DIV/0!				#DIV/0!				#DIV/0!				#DIV/0!				#DIV/0!
		0	0	#DIV/0!	0	0	#DIV/0!		0	0	#DIV/0!				#DIV/0!				#DIV/0!				#DIV/0!				#DIV/0!				#DIV/0!				#DIV/0!				#DIV/0!				#DIV/0!				#DIV/0!
		0	0	#DIV/0!	0	0	#DIV/0!		0	0	#DIV/0!				#DIV/0!				#DIV/0!				#DIV/0!				#DIV/0!				#DIV/0!				#DIV/0!				#DIV/0!				#DIV/0!				#DIV/0!
		0	0	#DIV/0!	0	0	#DIV/0!		0	0	#DIV/0!				#DIV/0!				#DIV/0!				#DIV/0!				#DIV/0!				#DIV/0!				#DIV/0!				#DIV/0!				#DIV/0!				#DIV/0!
		0	0	#DIV/0!	0	0	#DIV/0!		0	0	#DIV/0!				#DIV/0!				#DIV/0!				#DIV/0!				#DIV/0!				#DIV/0!				#DIV/0!				#DIV/0!				#DIV/0!				#DIV/0!
		0	0	#DIV/0!	0	0	#DIV/0!		0	0	#DIV/0!				#DIV/0!				#DIV/0!				#DIV/0!				#DIV/0!				#DIV/0!				#DIV/0!				#DIV/0!				#DIV/0!				#DIV/0!
		0	0	#DIV/0!	0	0	#DIV/0!		0	0	#DIV/0!				#DIV/0!				#DIV/0!				#DIV/0!				#DIV/0!				#DIV/0!				#DIV/0!				#DIV/0!				#DIV/0!				#DIV/0!
		0	0	#DIV/0!	0	0	#DIV/0!		0	0	#DIV/0!				#DIV/0!				#DIV/0!				#DIV/0!				#DIV/0!				#DIV/0!				#DIV/0!				#DIV/0!				#DIV/0!				#DIV/0!
		0	0	#DIV/0!	0	0	#DIV/0!		0	0	#DIV/0!				#DIV/0!				#DIV/0!				#DIV/0!				#DIV/0!				#DIV/0!				#DIV/0!				#DIV/0!				#DIV/0!				#DIV/0!
		0	0	#DIV/0!	0	0	#DIV/0!		0	0	#DIV/0!				#DIV/0!				#DIV/0!				#DIV/0!				#DIV/0!				#DIV/0!				#DIV/0!				#DIV/0!				#DIV/0!				#DIV/0!
		0	0	#DIV/0!	0	0	#DIV/0!		0	0	#DIV/0!				#DIV/0!				#DIV/0!				#DIV/0!				#DIV/0!				#DIV/0!				#DIV/0!				#DIV/0!				#DIV/0!				#DIV/0!
		0	0	#DIV/0!	0	0	#DIV/0!		0	0	#DIV/0!				#DIV/0!				#DIV/0!				#DIV/0!				#DIV/0!				#DIV/0!				#DIV/0!				#DIV/0!				#DIV/0!				#DIV/0!
		0	0	#DIV/0!	0	0	#DIV/0!		0	0	#DIV/0!				#DIV/0!				#DIV/0!				#DIV/0!				#DIV/0!				#DIV/0!				#DIV/0!				#DIV/0!				#DIV/0!				#DIV/0!
		0	0	#DIV/0!	0	0	#DIV/0!		0	0	#DIV/0!				#DIV/0!				#DIV/0!				#DIV/0!				#DIV/0!				#DIV/0!				#DIV/0!				#DIV/0!				#DIV/0!				#DIV/0!
		0	0	#DIV/0!	0	0	#DIV/0!		0	0	#DIV/0!				#DIV/0!				#DIV/0!				#DIV/0!				#DIV/0!				#DIV/0!				#DIV/0!				#DIV/0!				#DIV/0!				#DIV/0!
		0	0	#DIV/0!	0	0	#DIV/0!		0	0	#DIV/0!				#DIV/0!				#DIV/0!				#DIV/0!				#DIV/0!				#DIV/0!				#DIV/0!				#DIV/0!				#DIV/0!				#DIV/0!
[truncated: 34 more rows]
[truncated: 115 more columns]

## Sheet: 7-h&n
Tumours of the head and neck
[truncated: 693 more rows]
[truncated: 115 more columns]

## Sheet: 8-hemato
Tumours of the hematopoietic and lymphoid tissues
[truncated: 697 more rows]
[truncated: 115 more columns]

[truncated: 6 more sheets: 9-lung,p,thy,h, 10-PNS, 11-skin, 12-ST&bone, 13-urinary&male rep, Sheet1]
